# Supplementary material for: Comparative single-cell transcriptional atlases of Babesia species reveal conserved and species-specific expression profiles
Source: PLoS Biol. 2022 Sep 22;20(9):e3001816. doi: 10.1371/journal.pbio.3001816 (PMC9531838; doi:10.1371/journal.pbio.3001816)
Supplement: S3 Table — Tabs 1–5 contain the list of differentially expressed genes (DEGs) of the inferred cell cycle phases (FC > 2, adjusted p-value < 0.01). Tabs 5 and 6 contain the list of conserved and species-specific DEGs. Tabs 7 and 8 contain the list of B. divergens and species-independent DEGs in the human versus bovine comparison. (XLSX) [file pbio.3001816.s003.xlsx]

## Sheet: Bbig cell cycle markers
GeneID	p_val	avg_log2FC	pct.1	pct.2	p_val_adj	cluster	gene	spp
Bdiv_003870c	0	4.40706	0.951	0.273	0	C	Bdiv-003870c	Bbig
Bdiv_010240c	0	4.34685	0.653	0.042	0	C	Bdiv-010240c	Bbig
Bdiv_023990c	0	4.21452	0.775	0.086	0	C	Bdiv-023990c	Bbig
Bdiv_013580c	1.17624e-306	3.13852	0.863	0.26	2.47481e-303	C	Bdiv-013580c	Bbig
Bdiv_009230c	4.8072e-266	2.17598	0.944	0.555	1.01143e-262	C	Bdiv-009230c	Bbig
Bdiv_007890	2.90183e-251	1.31856	0.997	0.918	6.10545e-248	C	Bdiv-007890	Bbig
Bdiv_001120c	3.07296e-243	1.89586	0.943	0.669	6.46551e-240	C	Bdiv-001120c	Bbig
Bdiv_028030	5.6579e-236	5.04276	0.53	0.047	1.19042e-232	C	Bdiv-028030	Bbig
Bdiv_036430	2.97213e-224	2.1787	0.877	0.441	6.25336e-221	C	Bdiv-036430	Bbig
Bdiv_034350c	3.5172e-221	2.70395	0.626	0.109	7.4002e-218	C	Bdiv-034350c	Bbig
Bdiv_040540	8.78016e-214	1.97618	0.868	0.411	1.84734e-210	C	Bdiv-040540	Bbig
Bdiv_038310	8.00787e-213	1.61286	0.936	0.723	1.68486e-209	C	Bdiv-038310	Bbig
Bdiv_039280c	3.3012e-207	3.37096	0.508	0.056	6.94573e-204	C	Bdiv-039280c	Bbig
Bdiv_006490c	8.01672e-189	3.12502	0.569	0.111	1.68672e-185	C	Bdiv-006490c	Bbig
Bdiv_037320c	2.29881e-181	3.36622	0.443	0.043	4.83669e-178	C	Bdiv-037320c	Bbig
Bdiv_001970c	5.03251e-176	1.93474	0.852	0.428	1.05884e-172	C	Bdiv-001970c	Bbig
Bdiv_013880c	4.58057e-161	3.35859	0.4	0.038	9.63751e-158	C	Bdiv-013880c	Bbig
Bdiv_000690c	2.56283e-159	2.51716	0.513	0.101	5.39219e-156	C	Bdiv-000690c	Bbig
Bdiv_034310c	1.12425e-156	2.48972	0.623	0.183	2.36541e-153	C	Bdiv-034310c	Bbig
Bdiv_001770c	2.33091e-139	1.71173	0.763	0.37	4.90424e-136	C	Bdiv-001770c	Bbig
Bdiv_028330	2.82493e-133	1.92783	0.746	0.353	5.94366e-130	C	Bdiv-028330	Bbig
Bdiv_035640	1.88943e-117	1.54765	0.735	0.361	3.97536e-114	C	Bdiv-035640	Bbig
Bdiv_033990c	9.52914e-109	1.87214	0.443	0.106	2.00493e-105	C	Bdiv-033990c	Bbig
Bdiv_036790c	1.62787e-108	2.11044	0.348	0.056	3.42504e-105	C	Bdiv-036790c	Bbig
Bdiv_011610c	1.24081e-106	1.63803	0.631	0.274	2.61067e-103	C	Bdiv-011610c	Bbig
Bdiv_025260c	2.16344e-101	1.51262	0.653	0.3	4.55187e-98	C	Bdiv-025260c	Bbig
Bdiv_005540	1.46001e-98	2.08749	0.282	0.032	3.07185e-95	C	Bdiv-005540	Bbig
Bdiv_021270c	9.75033e-97	1.98896	0.436	0.122	2.05147e-93	C	Bdiv-021270c	Bbig
Bdiv_037350c	1.17916e-96	1.2984	0.776	0.499	2.48096e-93	C	Bdiv-037350c	Bbig
Bdiv_014710	5.18831e-96	1.31698	0.725	0.404	1.09162e-92	C	Bdiv-014710	Bbig
Bdiv_001930c	2.14658e-85	1.73448	0.425	0.129	4.5164e-82	C	Bdiv-001930c	Bbig
Bdiv_015750	2.6381e-85	1.51486	0.566	0.242	5.55056e-82	C	Bdiv-015750	Bbig
Bdiv_037020c	5.4862e-80	1.6698	0.433	0.144	1.1543e-76	C	Bdiv-037020c	Bbig
Bdiv_040570	1.68019e-76	1.02642	0.821	0.584	3.53512e-73	C	Bdiv-040570	Bbig
Bdiv_024410	6.69668e-72	1.39535	0.654	0.364	1.40898e-68	C	Bdiv-024410	Bbig
Bdiv_016930	2.23683e-66	1.07841	0.736	0.507	4.70628e-63	C	Bdiv-016930	Bbig
Bdiv_023470	1.44266e-64	1.63841	0.325	0.092	3.03535e-61	C	Bdiv-023470	Bbig
Bdiv_005200	1.03596e-61	1.54534	0.387	0.14	2.17967e-58	C	Bdiv-005200	Bbig
Bdiv_024360	2.3027e-59	1.57292	0.503	0.248	4.84487e-56	C	Bdiv-024360	Bbig
Bdiv_024660c	7.31482e-57	1.32327	0.453	0.2	1.53904e-53	C	Bdiv-024660c	Bbig
Bdiv_030860	1.19713e-56	1.45454	0.351	0.117	2.51875e-53	C	Bdiv-030860	Bbig
Bdiv_032880	1.00196e-55	1.21217	0.56	0.309	2.10812e-52	C	Bdiv-032880	Bbig
Bdiv_020210c	1.32218e-55	1.26376	0.506	0.244	2.78186e-52	C	Bdiv-020210c	Bbig
Bdiv_002460	3.4897e-54	1.11895	0.634	0.386	7.34234e-51	C	Bdiv-002460	Bbig
Bdiv_033400	1.01735e-52	1.13174	0.577	0.334	2.1405e-49	C	Bdiv-033400	Bbig
Bdiv_020050c	3.28699e-49	1.01331	0.631	0.402	6.91582e-46	C	Bdiv-020050c	Bbig
Bdiv_025340c	3.86219e-49	1.38149	0.389	0.159	8.12604e-46	C	Bdiv-025340c	Bbig
Bdiv_037800c	1.77564e-47	1.24551	0.427	0.192	3.73595e-44	C	Bdiv-037800c	Bbig
Bdiv_002840c	9.24892e-47	1.1184	0.52	0.286	1.94597e-43	C	Bdiv-002840c	Bbig
Bdiv_034460	5.97647e-45	1.18821	0.413	0.196	1.25745e-41	C	Bdiv-034460	Bbig
Bdiv_036750c	9.01212e-44	1.35452	0.233	0.065	1.89615e-40	C	Bdiv-036750c	Bbig
Bdiv_009180	1.07951e-39	1.26179	0.63	0.507	2.27129e-36	C	Bdiv-009180	Bbig
Bdiv_001800c	6.018e-38	1.0559	0.438	0.236	1.26619e-34	C	Bdiv-001800c	Bbig
Bdiv_015850c	3.27657e-37	1.19079	0.367	0.177	6.8939e-34	C	Bdiv-015850c	Bbig
Bdiv_012930	7.51178e-37	1.41905	0.206	0.061	1.58048e-33	C	Bdiv-012930	Bbig
Bdiv_005830c	1.02543e-36	1.00331	0.571	0.385	2.15751e-33	C	Bdiv-005830c	Bbig
Bdiv_016880c	1.3058e-36	1.09411	0.396	0.201	2.7474e-33	C	Bdiv-016880c	Bbig
Bdiv_031210	9.08573e-36	1.17929	0.318	0.138	1.91164e-32	C	Bdiv-031210	Bbig
Bdiv_027550	1.60054e-34	1.33126	0.25	0.093	3.36754e-31	C	Bdiv-027550	Bbig
Bdiv_033310c	1.23489e-33	1.02295	0.411	0.221	2.5982e-30	C	Bdiv-033310c	Bbig
Bdiv_029390	1.8288e-32	1.11091	0.348	0.172	3.84779e-29	C	Bdiv-029390	Bbig
Bdiv_028410c	6.84641e-28	1.13154	0.196	0.067	1.44049e-24	C	Bdiv-028410c	Bbig
Bdiv_038640	1.15549e-23	1.03829	0.283	0.144	2.43116e-20	C	Bdiv-038640	Bbig
Bdiv_024520	0	3.04483	0.888	0.165	0	G	Bdiv-024520	Bbig
Bdiv_028150c	6.28313e-259	1.3318	0.995	0.768	1.32197e-255	G	Bdiv-028150c	Bbig
Bdiv_030940	1.69014e-253	2.47507	0.704	0.127	3.55606e-250	G	Bdiv-030940	Bbig
Bdiv_023320c	6.82985e-232	2.47325	0.614	0.083	1.437e-228	G	Bdiv-023320c	Bbig
Bdiv_013230	1.8053e-201	1.41094	0.943	0.51	3.79835e-198	G	Bdiv-013230	Bbig
Bdiv_029570	2.12843e-201	2.0904	0.681	0.161	4.47821e-198	G	Bdiv-029570	Bbig
Bdiv_027200	1.63496e-186	1.57623	0.867	0.39	3.43995e-183	G	Bdiv-027200	Bbig
Bdiv_005620c	8.79288e-173	2.48378	0.4	0.022	1.85002e-169	G	Bdiv-005620c	Bbig
Bdiv_035250	1.71827e-159	1.67458	0.713	0.249	3.61523e-156	G	Bdiv-035250	Bbig
Bdiv_022900	7.36753e-157	1.83309	0.641	0.194	1.55013e-153	G	Bdiv-022900	Bbig
Bdiv_015420c	4.80983e-152	2.09642	0.493	0.089	1.01199e-148	G	Bdiv-015420c	Bbig
Bdiv_034270c	7.5796e-152	1.88743	0.586	0.147	1.59475e-148	G	Bdiv-034270c	Bbig
Bdiv_039290c	4.95007e-147	1.29174	0.838	0.378	1.0415e-143	G	Bdiv-039290c	Bbig
Bdiv_027330	2.26837e-146	2.12761	0.458	0.073	4.77265e-143	G	Bdiv-027330	Bbig
Bdiv_028680c	5.91083e-139	1.51891	0.729	0.313	1.24364e-135	G	Bdiv-028680c	Bbig
Bdiv_037120c	6.7192e-139	1.2721	0.844	0.447	1.41372e-135	G	Bdiv-037120c	Bbig
Bdiv_036190	8.82254e-130	2.10977	0.35	0.033	1.85626e-126	G	Bdiv-036190	Bbig
Bdiv_036680c	1.42739e-124	2.09609	0.357	0.041	3.00324e-121	G	Bdiv-036680c	Bbig
Bdiv_029700c	2.18164e-124	1.94502	0.436	0.082	4.59017e-121	G	Bdiv-029700c	Bbig
Bdiv_016260	3.76328e-122	1.37364	0.678	0.257	7.91794e-119	G	Bdiv-016260	Bbig
Bdiv_012630c	1.25827e-119	1.57833	0.604	0.208	2.64741e-116	G	Bdiv-012630c	Bbig
Bdiv_001420c	2.96741e-116	1.69144	0.472	0.11	6.24342e-113	G	Bdiv-001420c	Bbig
Bdiv_001610c	4.77428e-116	1.48925	0.594	0.196	1.00451e-112	G	Bdiv-001610c	Bbig
Bdiv_032710	3.48483e-115	1.56057	0.612	0.218	7.33209e-112	G	Bdiv-032710	Bbig
Bdiv_036490c	6.59893e-115	1.41891	0.606	0.208	1.38841e-111	G	Bdiv-036490c	Bbig
Bdiv_001400c	1.93963e-110	1.44767	0.621	0.223	4.08097e-107	G	Bdiv-001400c	Bbig
Bdiv_032440	6.0322e-107	2.04243	0.25	0.01	1.26917e-103	G	Bdiv-032440	Bbig
Bdiv_037090c	2.05309e-103	1.52971	0.572	0.206	4.3197e-100	G	Bdiv-037090c	Bbig
Bdiv_014120c	1.04952e-100	1.75615	0.344	0.056	2.2082e-97	G	Bdiv-014120c	Bbig
Bdiv_022740	3.85637e-100	1.98413	0.255	0.017	8.1138e-97	G	Bdiv-022740	Bbig
Bdiv_034130c	1.07512e-98	1.50719	0.496	0.148	2.26205e-95	G	Bdiv-034130c	Bbig
Bdiv_022810c	7.17482e-98	1.90245	0.275	0.027	1.50958e-94	G	Bdiv-022810c	Bbig
Bdiv_017920	1.98406e-94	1.68062	0.338	0.058	4.17447e-91	G	Bdiv-017920	Bbig
Bdiv_038460	7.91382e-93	1.41794	0.507	0.167	1.66507e-89	G	Bdiv-038460	Bbig
Bdiv_020900c	1.34809e-89	1.26916	0.57	0.217	2.83638e-86	G	Bdiv-020900c	Bbig
Bdiv_036320c	9.91798e-89	1.21969	0.629	0.272	2.08674e-85	G	Bdiv-036320c	Bbig
Bdiv_028430	2.19126e-88	1.77243	0.266	0.031	4.6104e-85	G	Bdiv-028430	Bbig
Bdiv_024140c	3.67526e-87	1.45734	0.467	0.146	7.73275e-84	G	Bdiv-024140c	Bbig
Bdiv_025460	4.56572e-87	1.88408	0.223	0.014	9.60627e-84	G	Bdiv-025460	Bbig
Bdiv_024280c	1.89678e-85	1.59701	0.357	0.08	3.99083e-82	G	Bdiv-024280c	Bbig
Bdiv_030000	8.23095e-85	1.73304	0.256	0.029	1.73179e-81	G	Bdiv-030000	Bbig
Bdiv_008680c	8.4908e-85	1.44524	0.442	0.132	1.78646e-81	G	Bdiv-008680c	Bbig
Bdiv_004240	2.71019e-83	1.3698	0.498	0.175	5.70224e-80	G	Bdiv-004240	Bbig
Bdiv_029750	4.72469e-83	1.22948	0.537	0.197	9.94075e-80	G	Bdiv-029750	Bbig
Bdiv_024860c	4.91939e-83	1.72197	0.23	0.02	1.03504e-79	G	Bdiv-024860c	Bbig
Bdiv_002370	1.13313e-82	1.50979	0.403	0.112	2.38411e-79	G	Bdiv-002370	Bbig
Bdiv_021860c	6.60582e-82	1.36738	0.485	0.17	1.38986e-78	G	Bdiv-021860c	Bbig
Bdiv_027870	5.61893e-81	1.58281	0.322	0.064	1.18222e-77	G	Bdiv-027870	Bbig
Bdiv_010500	9.79209e-81	1.68473	0.255	0.032	2.06026e-77	G	Bdiv-010500	Bbig
Bdiv_014260c	1.13347e-80	1.46119	0.374	0.096	2.38483e-77	G	Bdiv-014260c	Bbig
Bdiv_016320	4.77458e-80	1.00194	0.752	0.419	1.00457e-76	G	Bdiv-016320	Bbig
Bdiv_011040	1.99954e-79	1.46563	0.34	0.077	4.20704e-76	G	Bdiv-011040	Bbig
Bdiv_035870	9.72894e-79	1.04287	0.698	0.38	2.04697e-75	G	Bdiv-035870	Bbig
Bdiv_005160c	3.31815e-77	1.37642	0.379	0.1	6.98139e-74	G	Bdiv-005160c	Bbig
Bdiv_010750	9.53293e-77	1.51493	0.307	0.062	2.00573e-73	G	Bdiv-010750	Bbig
Bdiv_027290c	3.5027e-75	1.58658	0.251	0.036	7.36968e-72	G	Bdiv-027290c	Bbig
Bdiv_027800	3.52196e-75	1.40688	0.393	0.117	7.4102e-72	G	Bdiv-027800	Bbig
Bdiv_028340c	1.08837e-73	1.52218	0.301	0.063	2.28994e-70	G	Bdiv-028340c	Bbig
Bdiv_013920c	1.3889e-73	1.66809	0.243	0.034	2.92224e-70	G	Bdiv-013920c	Bbig
Bdiv_028120c	2.38963e-73	1.28802	0.467	0.171	5.02779e-70	G	Bdiv-028120c	Bbig
Bdiv_030820c	4.85122e-73	1.5453	0.27	0.047	1.0207e-69	G	Bdiv-030820c	Bbig
Bdiv_004360	3.66536e-72	1.55005	0.26	0.043	7.71191e-69	G	Bdiv-004360	Bbig
Bdiv_040000	1.74241e-70	1.19461	0.598	0.3	3.66604e-67	G	Bdiv-040000	Bbig
Bdiv_019130	4.44594e-68	1.33379	0.386	0.122	9.35426e-65	G	Bdiv-019130	Bbig
Bdiv_023480	5.90978e-66	1.18711	0.397	0.125	1.24342e-62	G	Bdiv-023480	Bbig
Bdiv_000600	9.91045e-65	1.27165	0.374	0.115	2.08516e-61	G	Bdiv-000600	Bbig
Bdiv_007910	9.94462e-64	1.38933	0.263	0.054	2.09235e-60	G	Bdiv-007910	Bbig
Bdiv_005120	3.27743e-62	1.45799	0.214	0.031	6.89572e-59	G	Bdiv-005120	Bbig
Bdiv_015050	5.5951e-62	1.47601	0.19	0.022	1.17721e-58	G	Bdiv-015050	Bbig
Bdiv_004440	2.95314e-61	1.41832	0.27	0.061	6.2134e-58	G	Bdiv-004440	Bbig
Bdiv_005870	7.39529e-61	1.43503	0.224	0.038	1.55597e-57	G	Bdiv-005870	Bbig
Bdiv_032840	4.00646e-60	1.46596	0.169	0.014	8.4296e-57	G	Bdiv-032840	Bbig
Bdiv_037940	7.85667e-60	1.33091	0.265	0.059	1.65304e-56	G	Bdiv-037940	Bbig
Bdiv_012860	1.5491e-59	1.32894	0.367	0.121	3.2593e-56	G	Bdiv-012860	Bbig
Bdiv_036910c	1.80668e-59	1.10092	0.507	0.23	3.80126e-56	G	Bdiv-036910c	Bbig
Bdiv_030410c	4.39737e-59	1.49071	0.195	0.026	9.25206e-56	G	Bdiv-030410c	Bbig
Bdiv_019100c	9.10464e-59	1.33179	0.311	0.087	1.91562e-55	G	Bdiv-019100c	Bbig
Bdiv_005820	2.28875e-58	1.16746	0.343	0.104	4.81554e-55	G	Bdiv-005820	Bbig
Bdiv_030980c	2.53059e-58	1.19736	0.386	0.137	5.32437e-55	G	Bdiv-030980c	Bbig
Bdiv_014220	3.20868e-58	1.54836	0.181	0.022	6.75105e-55	G	Bdiv-014220	Bbig
Bdiv_032310	1.47396e-57	1.21385	0.344	0.111	3.10121e-54	G	Bdiv-032310	Bbig
Bdiv_027840	4.04835e-57	1.46229	0.206	0.034	8.51773e-54	G	Bdiv-027840	Bbig
Bdiv_029130	5.14515e-57	1.3752	0.167	0.016	1.08254e-53	G	Bdiv-029130	Bbig
Bdiv_036330	3.03066e-56	1.22487	0.326	0.099	6.37652e-53	G	Bdiv-036330	Bbig
Bdiv_005570	9.24289e-56	1.15191	0.407	0.154	1.9447e-52	G	Bdiv-005570	Bbig
Bdiv_031550	1.03423e-55	1.01936	0.517	0.241	2.17602e-52	G	Bdiv-031550	Bbig
Bdiv_003700	1.37744e-55	1.16128	0.417	0.164	2.89813e-52	G	Bdiv-003700	Bbig
Bdiv_018770c	2.46875e-55	1.30332	0.264	0.065	5.19426e-52	G	Bdiv-018770c	Bbig
Bdiv_024080	3.92559e-55	1.46304	0.209	0.037	8.25945e-52	G	Bdiv-024080	Bbig
Bdiv_022460c	1.66029e-54	1.37647	0.17	0.02	3.49324e-51	G	Bdiv-022460c	Bbig
Bdiv_021410	8.0965e-54	1.36449	0.235	0.052	1.7035e-50	G	Bdiv-021410	Bbig
Bdiv_036440	9.3969e-54	1.26201	0.282	0.078	1.97711e-50	G	Bdiv-036440	Bbig
Bdiv_018750c	4.19968e-53	1.06996	0.498	0.23	8.83613e-50	G	Bdiv-018750c	Bbig
Bdiv_025000c	1.0144e-52	1.3311	0.151	0.014	2.13429e-49	G	Bdiv-025000c	Bbig
Bdiv_016360c	1.24992e-52	1.05759	0.437	0.184	2.62982e-49	G	Bdiv-016360c	Bbig
Bdiv_029940	1.55089e-52	1.2074	0.359	0.131	3.26306e-49	G	Bdiv-029940	Bbig
Bdiv_000240c	2.11999e-52	1.27021	0.252	0.062	4.46046e-49	G	Bdiv-000240c	Bbig
Bdiv_014090c	5.41076e-52	1.04368	0.398	0.152	1.13842e-48	G	Bdiv-014090c	Bbig
Bdiv_004830	2.49536e-51	1.18835	0.319	0.103	5.25023e-48	G	Bdiv-004830	Bbig
Bdiv_009710c	5.19171e-51	1.22982	0.275	0.078	1.09233e-47	G	Bdiv-009710c	Bbig
Bdiv_005420	1.23197e-50	1.21749	0.303	0.094	2.59206e-47	G	Bdiv-005420	Bbig
Bdiv_036040c	2.58303e-50	1.21926	0.228	0.052	5.4347e-47	G	Bdiv-036040c	Bbig
Bdiv_014130	4.00919e-50	1.3099	0.201	0.038	8.43534e-47	G	Bdiv-014130	Bbig
Bdiv_033570	4.97095e-50	1.20077	0.315	0.103	1.04589e-46	G	Bdiv-033570	Bbig
Bdiv_023040	2.05136e-49	1.15414	0.241	0.059	4.31605e-46	G	Bdiv-023040	Bbig
Bdiv_024640	3.02296e-49	1.16619	0.33	0.118	6.36031e-46	G	Bdiv-024640	Bbig
Bdiv_027620	3.05112e-49	1.31505	0.145	0.014	6.41956e-46	G	Bdiv-027620	Bbig
Bdiv_036080c	1.28159e-48	1.19789	0.267	0.076	2.69646e-45	G	Bdiv-036080c	Bbig
Bdiv_004630	1.76743e-48	1.20639	0.24	0.06	3.71867e-45	G	Bdiv-004630	Bbig
Bdiv_036920c	2.24883e-48	1.26183	0.195	0.037	4.73154e-45	G	Bdiv-036920c	Bbig
Bdiv_036410	1.81406e-47	1.13507	0.315	0.108	3.81679e-44	G	Bdiv-036410	Bbig
Bdiv_009200c	2.22759e-47	1.10643	0.351	0.133	4.68685e-44	G	Bdiv-009200c	Bbig
Bdiv_009140c	6.93262e-47	1.32591	0.141	0.015	1.45862e-43	G	Bdiv-009140c	Bbig
Bdiv_032690	9.5008e-47	1.26805	0.252	0.072	1.99897e-43	G	Bdiv-032690	Bbig
Bdiv_036840c	2.0899e-46	1.30271	0.232	0.061	4.39715e-43	G	Bdiv-036840c	Bbig
Bdiv_004510c	2.77941e-46	1.06438	0.351	0.136	5.84788e-43	G	Bdiv-004510c	Bbig
Bdiv_000430	4.00576e-46	1.18626	0.134	0.012	8.42812e-43	G	Bdiv-000430	Bbig
Bdiv_002800c	6.33264e-46	1.19571	0.257	0.075	1.33239e-42	G	Bdiv-002800c	Bbig
Bdiv_040490c	1.00141e-45	1.17171	0.27	0.082	2.10697e-42	G	Bdiv-040490c	Bbig
Bdiv_028440c	1.7415e-45	1.24121	0.164	0.026	3.66413e-42	G	Bdiv-028440c	Bbig
Bdiv_040100c	1.94268e-45	1.06914	0.382	0.161	4.08739e-42	G	Bdiv-040100c	Bbig
Bdiv_023410	2.1068e-45	1.23638	0.25	0.072	4.4327e-42	G	Bdiv-023410	Bbig
Bdiv_034080c	3.1796e-45	1.35398	0.129	0.012	6.68989e-42	G	Bdiv-034080c	Bbig
Bdiv_023690c	7.23369e-45	1.13519	0.299	0.101	1.52197e-41	G	Bdiv-023690c	Bbig
Bdiv_022880c	9.44424e-45	1.16094	0.232	0.061	1.98707e-41	G	Bdiv-022880c	Bbig
Bdiv_016030c	1.27368e-44	1.20217	0.215	0.052	2.67982e-41	G	Bdiv-016030c	Bbig
Bdiv_011330	1.42455e-44	1.09829	0.221	0.055	2.99726e-41	G	Bdiv-011330	Bbig
Bdiv_020250c	2.21099e-44	1.22656	0.146	0.019	4.65193e-41	G	Bdiv-020250c	Bbig
Bdiv_031830	3.50195e-44	1.23804	0.227	0.06	7.36811e-41	G	Bdiv-031830	Bbig
Bdiv_013120c	6.49718e-44	1.11147	0.215	0.052	1.36701e-40	G	Bdiv-013120c	Bbig
Bdiv_005470	7.97225e-44	1.10545	0.307	0.108	1.67736e-40	G	Bdiv-005470	Bbig
Bdiv_017360c	1.04206e-43	1.14494	0.256	0.077	2.1925e-40	G	Bdiv-017360c	Bbig
Bdiv_036890c	1.53095e-43	1.22237	0.135	0.015	3.22111e-40	G	Bdiv-036890c	Bbig
Bdiv_003760c	2.78185e-43	1.30054	0.121	0.01	5.85302e-40	G	Bdiv-003760c	Bbig
Bdiv_034880	5.36322e-43	1.22047	0.15	0.022	1.12842e-39	G	Bdiv-034880	Bbig
Bdiv_040140c	9.88161e-43	1.13859	0.208	0.05	2.07909e-39	G	Bdiv-040140c	Bbig
Bdiv_036860c	2.25462e-42	1.05254	0.272	0.087	4.74372e-39	G	Bdiv-036860c	Bbig
Bdiv_018800	7.555e-42	1.08748	0.304	0.112	1.58957e-38	G	Bdiv-018800	Bbig
Bdiv_027460	7.85352e-42	1.05677	0.303	0.11	1.65238e-38	G	Bdiv-027460	Bbig
Bdiv_010300	9.16928e-42	1.15968	0.22	0.059	1.92922e-38	G	Bdiv-010300	Bbig
Bdiv_021150c	1.17324e-41	1.12421	0.234	0.066	2.4685e-38	G	Bdiv-021150c	Bbig
Bdiv_014020c	1.48425e-41	1.1039	0.28	0.096	3.12286e-38	G	Bdiv-014020c	Bbig
Bdiv_025450c	1.98144e-41	1.09771	0.114	0.009	4.16896e-38	G	Bdiv-025450c	Bbig
Bdiv_022060	1.00784e-40	1.18062	0.153	0.026	2.12049e-37	G	Bdiv-022060	Bbig
Bdiv_017980	1.42692e-40	1.16103	0.217	0.06	3.00224e-37	G	Bdiv-017980	Bbig
Bdiv_033870	2.54631e-40	1.06782	0.274	0.094	5.35744e-37	G	Bdiv-033870	Bbig
Bdiv_023060	5.04874e-40	1.06122	0.257	0.082	1.06225e-36	G	Bdiv-023060	Bbig
Bdiv_019800	5.90517e-40	1.09871	0.129	0.016	1.24245e-36	G	Bdiv-019800	Bbig
Bdiv_020880	8.89622e-40	1.11448	0.13	0.016	1.87176e-36	G	Bdiv-020880	Bbig
Bdiv_021990c	1.48248e-39	1.1104	0.101	0.006	3.11913e-36	G	Bdiv-021990c	Bbig
Bdiv_033580c	2.15582e-39	1.10869	0.151	0.026	4.53585e-36	G	Bdiv-033580c	Bbig
Bdiv_022250c	9.88443e-39	1.17652	0.175	0.039	2.07968e-35	G	Bdiv-022250c	Bbig
Bdiv_003820	1.13737e-38	1.1348	0.13	0.017	2.39302e-35	G	Bdiv-003820	Bbig
Bdiv_039540c	1.19742e-38	1.01656	0.239	0.074	2.51937e-35	G	Bdiv-039540c	Bbig
Bdiv_004590	1.54059e-38	1.18451	0.136	0.021	3.2414e-35	G	Bdiv-004590	Bbig
Bdiv_027750	2.97161e-38	1.09542	0.237	0.074	6.25227e-35	G	Bdiv-027750	Bbig
Bdiv_028830c	9.2261e-38	1.03449	0.25	0.082	1.94117e-34	G	Bdiv-028830c	Bbig
Bdiv_004130c	1.16746e-37	1.10768	0.131	0.019	2.45633e-34	G	Bdiv-004130c	Bbig
Bdiv_009210	1.26517e-37	1.12002	0.156	0.031	2.66191e-34	G	Bdiv-009210	Bbig
Bdiv_021200c	2.25004e-37	1.04514	0.087	0.003	4.73408e-34	G	Bdiv-021200c	Bbig
Bdiv_033680c	1.19662e-36	1.18539	0.141	0.025	2.51769e-33	G	Bdiv-033680c	Bbig
Bdiv_014010	1.5621e-36	1.19537	0.147	0.028	3.28665e-33	G	Bdiv-014010	Bbig
Bdiv_016490c	2.3477e-36	1.12755	0.188	0.049	4.93955e-33	G	Bdiv-016490c	Bbig
Bdiv_009380	3.72757e-36	1.07541	0.179	0.044	7.84281e-33	G	Bdiv-009380	Bbig
Bdiv_027540	6.42437e-36	1.03251	0.108	0.011	1.35169e-32	G	Bdiv-027540	Bbig
Bdiv_004990	1.21502e-35	1.0036	0.274	0.103	2.55641e-32	G	Bdiv-004990	Bbig
Bdiv_018000	1.38167e-35	1.08585	0.169	0.04	2.90702e-32	G	Bdiv-018000	Bbig
Bdiv_032050c	2.08286e-35	1.09399	0.166	0.038	4.38234e-32	G	Bdiv-032050c	Bbig
Bdiv_038450c	2.52924e-35	1.04975	0.257	0.093	5.32151e-32	G	Bdiv-038450c	Bbig
Bdiv_005590c	3.442e-35	1.10092	0.171	0.041	7.24196e-32	G	Bdiv-005590c	Bbig
Bdiv_007650	4.72445e-35	1.07869	0.084	0.003	9.94024e-32	G	Bdiv-007650	Bbig
Bdiv_005290c	4.88389e-35	1.01396	0.192	0.053	1.02757e-31	G	Bdiv-005290c	Bbig
Bdiv_005630	5.94788e-35	1.03063	0.079	0.002	1.25143e-31	G	Bdiv-005630	Bbig
Bdiv_035130	6.00347e-35	1.01154	0.172	0.042	1.26313e-31	G	Bdiv-035130	Bbig
Bdiv_008850	1.4239e-34	1.07093	0.112	0.014	2.99589e-31	G	Bdiv-008850	Bbig
Bdiv_021680	1.73409e-34	1.0761	0.161	0.037	3.64853e-31	G	Bdiv-021680	Bbig
Bdiv_012730c	3.54848e-34	1.01365	0.232	0.078	7.466e-31	G	Bdiv-012730c	Bbig
Bdiv_038650c	3.58409e-34	1.0622	0.156	0.035	7.54093e-31	G	Bdiv-038650c	Bbig
Bdiv_022170c	3.61496e-34	1.0419	0.22	0.072	7.60587e-31	G	Bdiv-022170c	Bbig
Bdiv_039000c	9.13764e-34	1.01707	0.163	0.039	1.92256e-30	G	Bdiv-039000c	Bbig
Bdiv_016980c	1.97311e-33	1.01083	0.187	0.052	4.15142e-30	G	Bdiv-016980c	Bbig
Bdiv_005560c	2.16152e-33	1.05784	0.184	0.051	4.54785e-30	G	Bdiv-005560c	Bbig
Bdiv_038790c	2.28339e-33	1.02877	0.101	0.011	4.80426e-30	G	Bdiv-038790c	Bbig
Bdiv_015300	5.66881e-33	1.02815	0.195	0.058	1.19272e-29	G	Bdiv-015300	Bbig
Bdiv_006400c	1.08781e-32	1.04685	0.179	0.05	2.28876e-29	G	Bdiv-006400c	Bbig
Bdiv_016080	1.52511e-32	1.0222	0.191	0.056	3.20882e-29	G	Bdiv-016080	Bbig
Bdiv_013240	2.22945e-32	1.02272	0.164	0.041	4.69076e-29	G	Bdiv-013240	Bbig
Bdiv_005960c	2.76406e-32	1.07555	0.17	0.045	5.81559e-29	G	Bdiv-005960c	Bbig
Bdiv_030080	5.083e-32	1.03749	0.129	0.024	1.06946e-28	G	Bdiv-030080	Bbig
Bdiv_008200c	7.36678e-32	1.00074	0.139	0.029	1.54997e-28	G	Bdiv-008200c	Bbig
Bdiv_005230c	8.38556e-32	1.00423	0.126	0.023	1.76432e-28	G	Bdiv-005230c	Bbig
Bdiv_015260c	1.9397e-31	1.04695	0.141	0.031	4.08113e-28	G	Bdiv-015260c	Bbig
Bdiv_027490	4.18711e-31	1.0192	0.166	0.044	8.80967e-28	G	Bdiv-027490	Bbig
Bdiv_034870c	8.73723e-31	1.01732	0.214	0.074	1.83831e-27	G	Bdiv-034870c	Bbig
Bdiv_031510	1.95508e-30	1.00897	0.148	0.036	4.11349e-27	G	Bdiv-031510	Bbig
Bdiv_029350c	2.73979e-30	1.03334	0.162	0.044	5.76452e-27	G	Bdiv-029350c	Bbig
Bdiv_036360c	3.0078e-30	1.01556	0.201	0.067	6.32841e-27	G	Bdiv-036360c	Bbig
Bdiv_009460	6.35584e-30	1.04712	0.144	0.035	1.33727e-26	G	Bdiv-009460	Bbig
Bdiv_027500c	1.41709e-29	1.03881	0.095	0.012	2.98156e-26	G	Bdiv-027500c	Bbig
Bdiv_013490	4.55328e-29	1.04392	0.108	0.018	9.58009e-26	G	Bdiv-013490	Bbig
Bdiv_016060	0	3.43554	0.731	0.05	0	SM	Bdiv-016060	Bbig
Bdiv_015190	0	2.5471	0.907	0.228	0	SM	Bdiv-015190	Bbig
Bdiv_010140c	0	2.44721	0.964	0.314	0	SM	Bdiv-010140c	Bbig
Bdiv_034020c	0	2.41592	0.973	0.349	0	SM	Bdiv-034020c	Bbig
Bdiv_017140	0	2.3573	0.96	0.333	0	SM	Bdiv-017140	Bbig
Bdiv_019030	2.49657e-306	2.0599	0.973	0.476	5.25279e-303	SM	Bdiv-019030	Bbig
Bdiv_005010c	5.8205e-292	1.81488	0.979	0.462	1.22463e-288	SM	Bdiv-005010c	Bbig
Bdiv_012980	3.94042e-286	2.14877	0.904	0.238	8.29064e-283	SM	Bdiv-012980	Bbig
Bdiv_033720	5.31686e-286	1.75334	0.987	0.536	1.11867e-282	SM	Bdiv-033720	Bbig
Bdiv_031730c	1.37674e-280	2.11376	0.928	0.259	2.89666e-277	SM	Bdiv-031730c	Bbig
Bdiv_002900c	1.74674e-244	1.44298	0.98	0.667	3.67513e-241	SM	Bdiv-002900c	Bbig
Bdiv_020490	3.05985e-233	2.04983	0.818	0.243	6.43793e-230	SM	Bdiv-020490	Bbig
Bdiv_016310c	9.69647e-233	1.75028	0.907	0.396	2.04014e-229	SM	Bdiv-016310c	Bbig
Bdiv_016230c	7.80085e-223	2.49116	0.609	0.094	1.6413e-219	SM	Bdiv-016230c	Bbig
Bdiv_037570c	1.41499e-219	1.67127	0.905	0.394	2.97714e-216	SM	Bdiv-037570c	Bbig
Bdiv_017540	3.89163e-218	2.67872	0.528	0.05	8.188e-215	SM	Bdiv-017540	Bbig
Bdiv_006100	7.84992e-212	1.92263	0.8	0.223	1.65162e-208	SM	Bdiv-006100	Bbig
Bdiv_037960	3.41925e-208	3.0362	0.469	0.031	7.1941e-205	SM	Bdiv-037960	Bbig
Bdiv_038490	1.20256e-206	2.16352	0.681	0.165	2.53019e-203	SM	Bdiv-038490	Bbig
Bdiv_039920	9.42952e-205	2.92208	0.454	0.027	1.98397e-201	SM	Bdiv-039920	Bbig
Bdiv_039980c	1.48523e-203	1.56513	0.918	0.36	3.12493e-200	SM	Bdiv-039980c	Bbig
Bdiv_024000c	1.89511e-199	2.6104	0.492	0.048	3.9873e-196	SM	Bdiv-024000c	Bbig
Bdiv_005720c	3.81546e-199	2.25446	0.63	0.129	8.02773e-196	SM	Bdiv-005720c	Bbig
Bdiv_000940c	2.22539e-198	2.80133	0.513	0.062	4.68223e-195	SM	Bdiv-000940c	Bbig
Bdiv_013520c	2.38412e-197	2.20383	0.637	0.135	5.01618e-194	SM	Bdiv-013520c	Bbig
Bdiv_014780	7.99402e-197	2.6071	0.474	0.041	1.68194e-193	SM	Bdiv-014780	Bbig
Bdiv_027570c	7.42397e-195	2.85863	0.424	0.021	1.562e-191	SM	Bdiv-027570c	Bbig
Bdiv_000370c	1.96542e-190	2.94909	0.44	0.031	4.13524e-187	SM	Bdiv-000370c	Bbig
Bdiv_000760c	2.00358e-188	2.67505	0.435	0.031	4.21553e-185	SM	Bdiv-000760c	Bbig
Bdiv_015820c	7.12827e-187	2.70749	0.43	0.028	1.49979e-183	SM	Bdiv-015820c	Bbig
Bdiv_028420	3.40477e-186	1.17683	0.979	0.686	7.16364e-183	SM	Bdiv-028420	Bbig
Bdiv_002680c	1.33343e-185	2.2369	0.689	0.204	2.80553e-182	SM	Bdiv-002680c	Bbig
Bdiv_004640c	3.75286e-184	1.97176	0.675	0.181	7.89602e-181	SM	Bdiv-004640c	Bbig
Bdiv_014590c	1.31959e-183	1.80604	0.774	0.294	2.77641e-180	SM	Bdiv-014590c	Bbig
Bdiv_032630c	1.63633e-182	1.55542	0.841	0.319	3.44284e-179	SM	Bdiv-032630c	Bbig
Bdiv_009450	4.0097e-180	2.52272	0.443	0.039	8.4364e-177	SM	Bdiv-009450	Bbig
Bdiv_030780	1.387e-179	1.14728	0.98	0.688	2.91824e-176	SM	Bdiv-030780	Bbig
Bdiv_006110	2.11757e-178	1.83935	0.703	0.196	4.45536e-175	SM	Bdiv-006110	Bbig
Bdiv_005690	1.53986e-175	1.61053	0.815	0.359	3.23986e-172	SM	Bdiv-005690	Bbig
Bdiv_023290c	2.60972e-167	2.32929	0.456	0.054	5.49085e-164	SM	Bdiv-023290c	Bbig
Bdiv_004730	4.98442e-167	2.27119	0.479	0.069	1.04872e-163	SM	Bdiv-004730	Bbig
Bdiv_020480	9.96502e-167	1.83767	0.673	0.205	2.09664e-163	SM	Bdiv-020480	Bbig
Bdiv_027890	1.19502e-165	1.78894	0.706	0.233	2.51431e-162	SM	Bdiv-027890	Bbig
Bdiv_013030c	3.16315e-165	2.56777	0.375	0.021	6.65527e-162	SM	Bdiv-013030c	Bbig
Bdiv_028900c	3.73542e-163	1.33298	0.899	0.517	7.85932e-160	SM	Bdiv-028900c	Bbig
Bdiv_013440	4.19557e-162	1.49153	0.843	0.379	8.82749e-159	SM	Bdiv-013440	Bbig
Bdiv_005110	1.69277e-160	2.34689	0.398	0.033	3.56159e-157	SM	Bdiv-005110	Bbig
Bdiv_032480	3.24959e-157	2.21428	0.461	0.066	6.83715e-154	SM	Bdiv-032480	Bbig
Bdiv_034370	2.54899e-154	2.25427	0.441	0.058	5.36307e-151	SM	Bdiv-034370	Bbig
Bdiv_004410c	3.8903e-154	1.07851	0.975	0.817	8.18519e-151	SM	Bdiv-004410c	Bbig
Bdiv_011270c	3.72679e-152	1.90559	0.564	0.13	7.84116e-149	SM	Bdiv-011270c	Bbig
Bdiv_019540c	1.33228e-151	1.6463	0.718	0.258	2.80312e-148	SM	Bdiv-019540c	Bbig
Bdiv_021450	6.86393e-146	1.39362	0.83	0.438	1.44417e-142	SM	Bdiv-021450	Bbig
Bdiv_024560c	3.68036e-144	1.06634	0.957	0.618	7.74348e-141	SM	Bdiv-024560c	Bbig
Bdiv_010000	2.68077e-142	2.24058	0.361	0.03	5.64034e-139	SM	Bdiv-010000	Bbig
Bdiv_029910c	5.99294e-142	1.36409	0.831	0.445	1.26092e-138	SM	Bdiv-029910c	Bbig
Bdiv_037780	4.24805e-141	1.58613	0.699	0.263	8.9379e-138	SM	Bdiv-037780	Bbig
Bdiv_024440c	1.75524e-140	1.71712	0.627	0.203	3.69303e-137	SM	Bdiv-024440c	Bbig
Bdiv_035350c	1.33822e-135	1.6151	0.661	0.239	2.81562e-132	SM	Bdiv-035350c	Bbig
Bdiv_014000	2.03702e-134	1.53883	0.702	0.295	4.28589e-131	SM	Bdiv-014000	Bbig
Bdiv_035010c	4.58303e-128	1.38428	0.75	0.347	9.6427e-125	SM	Bdiv-035010c	Bbig
Bdiv_001920	3.21294e-126	1.86212	0.47	0.103	6.76003e-123	SM	Bdiv-001920	Bbig
Bdiv_038950c	1.6412e-124	2.19911	0.319	0.027	3.45308e-121	SM	Bdiv-038950c	Bbig
Bdiv_032780	2.88386e-124	1.88979	0.441	0.088	6.06764e-121	SM	Bdiv-032780	Bbig
Bdiv_010110c	3.7629e-124	1.88781	0.465	0.1	7.91715e-121	SM	Bdiv-010110c	Bbig
Bdiv_040360	1.2333e-123	2.10224	0.428	0.08	2.59486e-120	SM	Bdiv-040360	Bbig
Bdiv_035650	2.37045e-122	2.17538	0.32	0.029	4.98742e-119	SM	Bdiv-035650	Bbig
Bdiv_032280	4.56619e-122	1.34067	0.757	0.382	9.60726e-119	SM	Bdiv-032280	Bbig
Bdiv_009050c	2.4648e-121	1.84234	0.484	0.12	5.18593e-118	SM	Bdiv-009050c	Bbig
Bdiv_002590	9.99161e-119	2.08554	0.328	0.035	2.10223e-115	SM	Bdiv-002590	Bbig
Bdiv_005170	4.11312e-117	1.38915	0.707	0.333	8.65401e-114	SM	Bdiv-005170	Bbig
Bdiv_030500	9.31681e-117	1.72668	0.513	0.136	1.96026e-113	SM	Bdiv-030500	Bbig
Bdiv_020310	5.2778e-116	2.02901	0.382	0.064	1.11045e-112	SM	Bdiv-020310	Bbig
Bdiv_017300	1.17079e-115	2.10915	0.309	0.03	2.46335e-112	SM	Bdiv-017300	Bbig
Bdiv_000810	6.15584e-115	2.17293	0.269	0.015	1.29519e-111	SM	Bdiv-000810	Bbig
Bdiv_034500	9.76754e-115	1.06585	0.857	0.469	2.05509e-111	SM	Bdiv-034500	Bbig
Bdiv_038990c	1.34431e-114	2.04712	0.279	0.017	2.82843e-111	SM	Bdiv-038990c	Bbig
Bdiv_027900c	3.04013e-114	1.86396	0.387	0.068	6.39643e-111	SM	Bdiv-027900c	Bbig
Bdiv_038960	6.67981e-114	2.02115	0.34	0.044	1.40543e-110	SM	Bdiv-038960	Bbig
Bdiv_017670c	2.50661e-113	1.44444	0.666	0.283	5.27391e-110	SM	Bdiv-017670c	Bbig
Bdiv_037760	1.23299e-112	1.92475	0.359	0.054	2.59421e-109	SM	Bdiv-037760	Bbig
Bdiv_028100	1.26292e-111	1.92578	0.406	0.083	2.65719e-108	SM	Bdiv-028100	Bbig
Bdiv_012900	3.25908e-109	1.17804	0.793	0.432	6.8571e-106	SM	Bdiv-012900	Bbig
Bdiv_024900c	5.9035e-108	2.25002	0.259	0.015	1.2421e-104	SM	Bdiv-024900c	Bbig
Bdiv_016250	4.69889e-106	1.83705	0.413	0.093	9.88647e-103	SM	Bdiv-016250	Bbig
Bdiv_010430c	3.1307e-105	1.64766	0.51	0.156	6.58698e-102	SM	Bdiv-010430c	Bbig
Bdiv_023730	5.00194e-105	1.08347	0.745	0.32	1.05241e-101	SM	Bdiv-023730	Bbig
Bdiv_035040c	1.33285e-101	1.91663	0.298	0.036	2.80431e-98	SM	Bdiv-035040c	Bbig
Bdiv_030120c	1.71559e-100	1.89369	0.326	0.05	3.60959e-97	SM	Bdiv-030120c	Bbig
Bdiv_024470c	9.77548e-100	1.32426	0.66	0.304	2.05676e-96	SM	Bdiv-024470c	Bbig
Bdiv_002320c	5.70383e-99	1.32625	0.639	0.284	1.20009e-95	SM	Bdiv-002320c	Bbig
Bdiv_011310c	1.24368e-98	1.4753	0.673	0.338	2.6167e-95	SM	Bdiv-011310c	Bbig
Bdiv_039470	1.67329e-94	1.8758	0.26	0.025	3.5206e-91	SM	Bdiv-039470	Bbig
Bdiv_025310	1.08957e-93	1.99622	0.24	0.018	2.29246e-90	SM	Bdiv-025310	Bbig
Bdiv_033910c	2.3049e-93	1.4188	0.571	0.228	4.84951e-90	SM	Bdiv-033910c	Bbig
Bdiv_019640c	9.97864e-91	1.81463	0.326	0.06	2.09951e-87	SM	Bdiv-019640c	Bbig
Bdiv_005270	1.49485e-90	1.64529	0.393	0.096	3.14516e-87	SM	Bdiv-005270	Bbig
Bdiv_034990	2.98572e-90	1.86206	0.238	0.02	6.28195e-87	SM	Bdiv-034990	Bbig
Bdiv_024970c	3.51398e-89	1.85086	0.276	0.037	7.39341e-86	SM	Bdiv-024970c	Bbig
Bdiv_033360c	8.19113e-89	1.79931	0.327	0.063	1.72341e-85	SM	Bdiv-033360c	Bbig
Bdiv_009690c	8.19862e-89	1.74654	0.344	0.073	1.72499e-85	SM	Bdiv-009690c	Bbig
Bdiv_020470c	3.55028e-88	1.80494	0.308	0.054	7.46979e-85	SM	Bdiv-020470c	Bbig
Bdiv_000390c	1.20175e-87	1.68817	0.381	0.096	2.52849e-84	SM	Bdiv-000390c	Bbig
Bdiv_020020c	1.60278e-85	1.45765	0.471	0.158	3.37225e-82	SM	Bdiv-020020c	Bbig
Bdiv_023260c	1.28455e-84	1.86052	0.206	0.012	2.70269e-81	SM	Bdiv-023260c	Bbig
Bdiv_031070	4.38985e-84	1.72756	0.239	0.024	9.23625e-81	SM	Bdiv-031070	Bbig
Bdiv_030890	1.10342e-83	1.73408	0.315	0.062	2.32159e-80	SM	Bdiv-030890	Bbig
Bdiv_005000c	6.745e-83	1.57186	0.388	0.104	1.41915e-79	SM	Bdiv-005000c	Bbig
Bdiv_039960	2.52373e-82	1.18823	0.673	0.363	5.30994e-79	SM	Bdiv-039960	Bbig
Bdiv_027250	2.81602e-81	1.74748	0.248	0.031	5.92491e-78	SM	Bdiv-027250	Bbig
Bdiv_018850c	4.96399e-81	1.56821	0.37	0.098	1.04442e-77	SM	Bdiv-018850c	Bbig
Bdiv_016010	4.40271e-77	1.7085	0.268	0.044	9.2633e-74	SM	Bdiv-016010	Bbig
Bdiv_007750c	6.79839e-77	1.35278	0.496	0.197	1.43038e-73	SM	Bdiv-007750c	Bbig
Bdiv_022230c	1.0067e-75	1.23345	0.578	0.258	2.11809e-72	SM	Bdiv-022230c	Bbig
Bdiv_035090	5.58061e-75	1.23821	0.542	0.237	1.17416e-71	SM	Bdiv-035090	Bbig
Bdiv_011800	8.16139e-75	1.75332	0.187	0.012	1.71716e-71	SM	Bdiv-011800	Bbig
Bdiv_024370c	1.14756e-74	1.12589	0.632	0.319	2.41446e-71	SM	Bdiv-024370c	Bbig
Bdiv_022490c	5.63675e-74	1.73326	0.243	0.036	1.18597e-70	SM	Bdiv-022490c	Bbig
Bdiv_016210	9.82154e-74	1.52144	0.356	0.099	2.06645e-70	SM	Bdiv-016210	Bbig
Bdiv_015030	9.48868e-73	1.65582	0.236	0.033	1.99642e-69	SM	Bdiv-015030	Bbig
Bdiv_009990c	5.7326e-72	1.49812	0.362	0.105	1.20614e-68	SM	Bdiv-009990c	Bbig
Bdiv_021230	2.0894e-71	1.48817	0.379	0.116	4.3961e-68	SM	Bdiv-021230	Bbig
Bdiv_024010	2.46055e-69	1.64715	0.241	0.04	5.17699e-66	SM	Bdiv-024010	Bbig
Bdiv_016330	2.29669e-68	1.58732	0.164	0.008	4.83224e-65	SM	Bdiv-016330	Bbig
Bdiv_028580c	3.57367e-68	1.72221	0.157	0.006	7.519e-65	SM	Bdiv-028580c	Bbig
Bdiv_036170c	6.38334e-68	1.56044	0.291	0.066	1.34306e-64	SM	Bdiv-036170c	Bbig
Bdiv_009410	2.91281e-67	1.57333	0.245	0.042	6.12855e-64	SM	Bdiv-009410	Bbig
Bdiv_038170	2.97439e-65	1.31702	0.452	0.188	6.25811e-62	SM	Bdiv-038170	Bbig
Bdiv_038340	3.61444e-64	1.31147	0.401	0.143	7.60478e-61	SM	Bdiv-038340	Bbig
Bdiv_017060c	8.49795e-64	1.4333	0.321	0.089	1.78797e-60	SM	Bdiv-017060c	Bbig
Bdiv_006420	1.04069e-63	1.56797	0.204	0.027	2.18961e-60	SM	Bdiv-006420	Bbig
Bdiv_014500	5.97514e-63	1.43894	0.326	0.094	1.25717e-59	SM	Bdiv-014500	Bbig
Bdiv_033040c	6.57851e-63	1.23152	0.456	0.181	1.38412e-59	SM	Bdiv-033040c	Bbig
Bdiv_000800c	2.00014e-62	1.57322	0.245	0.048	4.20828e-59	SM	Bdiv-000800c	Bbig
Bdiv_004650	6.26388e-62	1.48332	0.252	0.053	1.31792e-58	SM	Bdiv-004650	Bbig
Bdiv_010620	1.27539e-60	1.53209	0.151	0.009	2.68342e-57	SM	Bdiv-010620	Bbig
Bdiv_034910c	1.71116e-60	1.5121	0.291	0.078	3.60029e-57	SM	Bdiv-034910c	Bbig
Bdiv_021060	3.05234e-60	1.37613	0.295	0.077	6.42213e-57	SM	Bdiv-021060	Bbig
Bdiv_006430	3.57451e-60	1.16679	0.464	0.199	7.52078e-57	SM	Bdiv-006430	Bbig
Bdiv_010170c	4.44022e-60	1.67286	0.193	0.026	9.34223e-57	SM	Bdiv-010170c	Bbig
Bdiv_033960	5.62901e-60	1.38788	0.288	0.077	1.18434e-56	SM	Bdiv-033960	Bbig
Bdiv_038330c	5.60927e-58	1.4614	0.265	0.065	1.18019e-54	SM	Bdiv-038330c	Bbig
Bdiv_020650	3.83705e-57	1.41315	0.249	0.056	8.07315e-54	SM	Bdiv-020650	Bbig
Bdiv_022790	1.58859e-56	1.37583	0.315	0.098	3.3424e-53	SM	Bdiv-022790	Bbig
Bdiv_034690	2.46552e-56	1.3281	0.359	0.128	5.18746e-53	SM	Bdiv-034690	Bbig
Bdiv_040240c	3.32022e-56	1.26627	0.392	0.148	6.98575e-53	SM	Bdiv-040240c	Bbig
Bdiv_022710	7.82543e-56	1.25049	0.408	0.167	1.64647e-52	SM	Bdiv-022710	Bbig
Bdiv_030950c	6.44028e-55	1.42758	0.164	0.018	1.35503e-51	SM	Bdiv-030950c	Bbig
Bdiv_032340c	9.1471e-55	1.54205	0.123	0.004	1.92455e-51	SM	Bdiv-032340c	Bbig
Bdiv_039530	2.8993e-54	1.22417	0.394	0.159	6.10012e-51	SM	Bdiv-039530	Bbig
Bdiv_035930	6.20965e-54	1.2846	0.324	0.106	1.30651e-50	SM	Bdiv-035930	Bbig
Bdiv_029920	7.35008e-54	1.44365	0.165	0.019	1.54646e-50	SM	Bdiv-029920	Bbig
Bdiv_036720c	2.51828e-53	1.44275	0.196	0.034	5.29847e-50	SM	Bdiv-036720c	Bbig
Bdiv_021690c	2.83966e-53	1.43279	0.207	0.04	5.97465e-50	SM	Bdiv-021690c	Bbig
Bdiv_020550c	5.00782e-53	1.42282	0.26	0.068	1.05365e-49	SM	Bdiv-020550c	Bbig
Bdiv_012750	2.82611e-52	1.29212	0.27	0.075	5.94614e-49	SM	Bdiv-012750	Bbig
Bdiv_000820	2.93175e-52	1.40371	0.232	0.054	6.1684e-49	SM	Bdiv-000820	Bbig
Bdiv_010340c	7.96303e-52	1.27839	0.326	0.111	1.67542e-48	SM	Bdiv-010340c	Bbig
Bdiv_027100c	8.0992e-52	1.48062	0.193	0.033	1.70407e-48	SM	Bdiv-027100c	Bbig
Bdiv_036340	2.22644e-51	1.28892	0.24	0.057	4.68443e-48	SM	Bdiv-036340	Bbig
Bdiv_023160	3.18536e-50	1.42715	0.123	0.007	6.70201e-47	SM	Bdiv-023160	Bbig
Bdiv_007790	8.68831e-50	1.40009	0.145	0.015	1.82802e-46	SM	Bdiv-007790	Bbig
Bdiv_007600	1.49248e-48	1.16879	0.366	0.146	3.14018e-45	SM	Bdiv-007600	Bbig
Bdiv_016670c	1.62209e-48	1.47873	0.176	0.03	3.41288e-45	SM	Bdiv-016670c	Bbig
Bdiv_039100	1.76497e-48	1.01223	0.427	0.185	3.71349e-45	SM	Bdiv-039100	Bbig
Bdiv_035180	2.90463e-48	1.386	0.29	0.096	6.11133e-45	SM	Bdiv-035180	Bbig
Bdiv_039250c	5.89833e-47	1.26916	0.119	0.008	1.24101e-43	SM	Bdiv-039250c	Bbig
Bdiv_040500	9.05717e-47	1.2826	0.154	0.021	1.90563e-43	SM	Bdiv-040500	Bbig
Bdiv_010080c	2.11395e-46	1.29209	0.223	0.056	4.44776e-43	SM	Bdiv-010080c	Bbig
Bdiv_019890	3.08549e-46	1.17763	0.317	0.114	6.49188e-43	SM	Bdiv-019890	Bbig
Bdiv_033140	5.03094e-46	1.2351	0.104	0.003	1.05851e-42	SM	Bdiv-033140	Bbig
Bdiv_009600c	6.68325e-46	1.22636	0.306	0.109	1.40616e-42	SM	Bdiv-009600c	Bbig
Bdiv_017860	7.20933e-46	1.20465	0.315	0.117	1.51684e-42	SM	Bdiv-017860	Bbig
Bdiv_023590c	1.13441e-45	1.29143	0.237	0.065	2.38679e-42	SM	Bdiv-023590c	Bbig
Bdiv_012330c	2.04233e-45	1.31555	0.143	0.018	4.29707e-42	SM	Bdiv-012330c	Bbig
Bdiv_018340	2.72388e-45	1.24676	0.272	0.087	5.73105e-42	SM	Bdiv-018340	Bbig
Bdiv_028840c	1.22479e-44	1.06642	0.376	0.159	2.57697e-41	SM	Bdiv-028840c	Bbig
Bdiv_032650	1.33405e-44	1.38028	0.13	0.014	2.80685e-41	SM	Bdiv-032650	Bbig
Bdiv_023560c	3.27686e-44	1.30613	0.117	0.009	6.89451e-41	SM	Bdiv-023560c	Bbig
Bdiv_033630	3.6366e-44	1.19207	0.285	0.097	7.6514e-41	SM	Bdiv-033630	Bbig
Bdiv_024680	4.3932e-44	1.24811	0.14	0.018	9.24329e-41	SM	Bdiv-024680	Bbig
Bdiv_030420c	4.58785e-44	1.29897	0.125	0.012	9.65284e-41	SM	Bdiv-030420c	Bbig
Bdiv_026980	5.02743e-44	1.29549	0.147	0.021	1.05777e-40	SM	Bdiv-026980	Bbig
Bdiv_001220	9.43981e-44	1.34839	0.147	0.021	1.98614e-40	SM	Bdiv-001220	Bbig
Bdiv_024580	4.37547e-43	1.23084	0.201	0.047	9.206e-40	SM	Bdiv-024580	Bbig
Bdiv_023090	2.10438e-42	1.17433	0.211	0.055	4.42762e-39	SM	Bdiv-023090	Bbig
Bdiv_026900	6.65392e-42	1.24611	0.178	0.037	1.39998e-38	SM	Bdiv-026900	Bbig
Bdiv_003530	6.15262e-41	1.19255	0.222	0.063	1.29451e-37	SM	Bdiv-003530	Bbig
Bdiv_005210c	6.68822e-41	1.26816	0.184	0.042	1.4072e-37	SM	Bdiv-005210c	Bbig
Bdiv_023540	2.031e-40	1.17843	0.099	0.005	4.27323e-37	SM	Bdiv-023540	Bbig
Bdiv_002380c	2.14972e-40	1.09065	0.107	0.008	4.523e-37	SM	Bdiv-002380c	Bbig
Bdiv_038660	3.02658e-39	1.21666	0.208	0.057	6.36792e-36	SM	Bdiv-038660	Bbig
Bdiv_030690c	3.23253e-39	1.14804	0.11	0.01	6.80125e-36	SM	Bdiv-030690c	Bbig
Bdiv_001880c	2.51686e-38	1.16549	0.113	0.012	5.29547e-35	SM	Bdiv-001880c	Bbig
Bdiv_038210	4.79777e-38	1.04612	0.328	0.138	1.00945e-34	SM	Bdiv-038210	Bbig
Bdiv_002920	8.4379e-38	1.17864	0.201	0.056	1.77534e-34	SM	Bdiv-002920	Bbig
Bdiv_031810c	1.18601e-37	1.16389	0.14	0.024	2.49537e-34	SM	Bdiv-031810c	Bbig
Bdiv_009030	3.47221e-37	1.14628	0.19	0.049	7.30552e-34	SM	Bdiv-009030	Bbig
Bdiv_033380	8.11703e-37	1.13501	0.123	0.017	1.70782e-33	SM	Bdiv-033380	Bbig
Bdiv_013090c	1.3172e-36	1.20692	0.201	0.059	2.77139e-33	SM	Bdiv-013090c	Bbig
Bdiv_017800	2.66303e-36	1.12412	0.207	0.061	5.60302e-33	SM	Bdiv-017800	Bbig
Bdiv_010360	3.18806e-36	1.15356	0.187	0.05	6.70767e-33	SM	Bdiv-010360	Bbig
Bdiv_018820c	5.65921e-36	1.00721	0.227	0.073	1.1907e-32	SM	Bdiv-018820c	Bbig
Bdiv_033440	1.03233e-35	1.11396	0.111	0.013	2.17203e-32	SM	Bdiv-033440	Bbig
Bdiv_008700c	2.51507e-35	1.20504	0.185	0.051	5.2917e-32	SM	Bdiv-008700c	Bbig
Bdiv_015240c	4.4015e-35	1.15893	0.16	0.037	9.26075e-32	SM	Bdiv-015240c	Bbig
Bdiv_004450	5.39631e-35	1.16058	0.198	0.058	1.13538e-31	SM	Bdiv-004450	Bbig
Bdiv_034980c	1.43047e-34	1.07347	0.182	0.048	3.0097e-31	SM	Bdiv-034980c	Bbig
Bdiv_022500	1.59962e-34	1.15037	0.135	0.025	3.3656e-31	SM	Bdiv-022500	Bbig
Bdiv_032350	9.25041e-34	1.0627	0.085	0.005	1.94629e-30	SM	Bdiv-032350	Bbig
Bdiv_031060c	2.08967e-33	1.08044	0.131	0.024	4.39667e-30	SM	Bdiv-031060c	Bbig
Bdiv_030390c	2.4244e-33	1.1061	0.125	0.021	5.10094e-30	SM	Bdiv-030390c	Bbig
Bdiv_030710c	5.72073e-33	1.12764	0.095	0.009	1.20364e-29	SM	Bdiv-030710c	Bbig
Bdiv_035370	7.65147e-33	1.07934	0.183	0.053	1.60987e-29	SM	Bdiv-035370	Bbig
Bdiv_021830	1.32339e-32	1.04858	0.217	0.073	2.78442e-29	SM	Bdiv-021830	Bbig
Bdiv_005150	2.07416e-32	1.02679	0.289	0.124	4.36403e-29	SM	Bdiv-005150	Bbig
Bdiv_009300c	2.38021e-32	1.06879	0.092	0.009	5.00797e-29	SM	Bdiv-009300c	Bbig
Bdiv_004940c	1.55786e-31	1.12608	0.209	0.071	3.27774e-28	SM	Bdiv-004940c	Bbig
Bdiv_023310c	2.39851e-31	1.09211	0.146	0.034	5.04646e-28	SM	Bdiv-023310c	Bbig
Bdiv_015380	3.69316e-31	1.07264	0.128	0.025	7.77041e-28	SM	Bdiv-015380	Bbig
Bdiv_036350	3.73349e-31	1.02858	0.092	0.01	7.85526e-28	SM	Bdiv-036350	Bbig
Bdiv_030570	5.92466e-31	1.08667	0.153	0.039	1.24655e-27	SM	Bdiv-030570	Bbig
Bdiv_032700	8.0735e-31	1.04172	0.115	0.02	1.69866e-27	SM	Bdiv-032700	Bbig
Bdiv_035490	1.08465e-30	1.05838	0.125	0.024	2.28211e-27	SM	Bdiv-035490	Bbig
Bdiv_013740c	1.27568e-30	1.02757	0.149	0.036	2.68403e-27	SM	Bdiv-013740c	Bbig
Bdiv_022420c	2.84933e-30	1.05175	0.101	0.014	5.99499e-27	SM	Bdiv-022420c	Bbig
Bdiv_012830	6.43821e-28	1.08599	0.135	0.033	1.3546e-24	SM	Bdiv-012830	Bbig
Bdiv_011700c	1.49251e-27	1.07006	0.136	0.034	3.14024e-24	SM	Bdiv-011700c	Bbig
Bdiv_015590c	4.62628e-25	1.08151	0.142	0.042	9.73369e-22	SM	Bdiv-015590c	Bbig
Bdiv_038160c	8.6371e-45	2.49339	0.855	0.188	1.81725e-41	MC	Bdiv-038160c	Bbig
Bdiv_031730c	7.99789e-39	2.51795	1	0.474	1.68276e-35	MC	Bdiv-031730c	Bbig
Bdiv_024360	4.07949e-33	2.01621	0.935	0.305	8.58324e-30	MC	Bdiv-024360	Bbig
Bdiv_030500	1.94147e-29	1.9708	0.839	0.251	4.08485e-26	MC	Bdiv-030500	Bbig
Bdiv_040360	4.84555e-29	2.03193	0.726	0.186	1.0195e-25	MC	Bdiv-040360	Bbig
Bdiv_037800c	2.54435e-27	1.9222	0.79	0.245	5.35331e-24	MC	Bdiv-037800c	Bbig
Bdiv_009180	7.14006e-27	1.83335	0.968	0.532	1.50227e-23	MC	Bdiv-009180	Bbig
Bdiv_006100	7.40357e-27	1.74942	0.968	0.406	1.55771e-23	MC	Bdiv-006100	Bbig
Bdiv_012980	2.24323e-26	1.70717	0.968	0.452	4.71976e-23	MC	Bdiv-012980	Bbig
Bdiv_002680c	9.5169e-26	1.77508	0.887	0.357	2.00236e-22	MC	Bdiv-002680c	Bbig
Bdiv_009530c	3.5011e-25	1.93638	0.742	0.213	7.36632e-22	MC	Bdiv-009530c	Bbig
Bdiv_028330	7.84508e-25	1.58698	0.968	0.448	1.6506e-21	MC	Bdiv-028330	Bbig
Bdiv_023730	1.59669e-24	1.67396	0.952	0.453	3.35943e-21	MC	Bdiv-023730	Bbig
Bdiv_039410c	2.06068e-24	1.82734	0.403	0.065	4.33568e-21	MC	Bdiv-039410c	Bbig
Bdiv_033630	4.34785e-21	1.80049	0.581	0.152	9.14788e-18	MC	Bdiv-033630	Bbig
Bdiv_005540	4.39449e-21	1.97726	0.452	0.093	9.24602e-18	MC	Bdiv-005540	Bbig
Bdiv_038320	5.56871e-21	1.7561	0.742	0.254	1.17166e-17	MC	Bdiv-038320	Bbig
Bdiv_006490c	1.09576e-20	1.27243	0.758	0.224	2.30549e-17	MC	Bdiv-006490c	Bbig
Bdiv_010170c	3.49902e-20	1.6899	0.403	0.076	7.36193e-17	MC	Bdiv-010170c	Bbig
Bdiv_034020c	5.58815e-20	1.26933	1	0.55	1.17575e-16	MC	Bdiv-034020c	Bbig
Bdiv_022230c	2.36232e-19	1.52731	0.871	0.355	4.97032e-16	MC	Bdiv-022230c	Bbig
Bdiv_039980c	3.06541e-19	1.34923	0.968	0.539	6.44962e-16	MC	Bdiv-039980c	Bbig
Bdiv_004890c	2.37673e-18	1.36542	0.903	0.604	5.00063e-15	MC	Bdiv-004890c	Bbig
Bdiv_025340c	2.65223e-18	1.66406	0.661	0.213	5.58028e-15	MC	Bdiv-025340c	Bbig
Bdiv_032630c	3.36421e-18	1.41317	0.903	0.486	7.07829e-15	MC	Bdiv-032630c	Bbig
Bdiv_011550	3.05331e-17	1.80671	0.484	0.129	6.42416e-14	MC	Bdiv-011550	Bbig
Bdiv_019460c	7.08539e-17	1.45983	0.855	0.423	1.49077e-13	MC	Bdiv-019460c	Bbig
Bdiv_028840c	3.89917e-16	1.40918	0.661	0.223	8.20386e-13	MC	Bdiv-028840c	Bbig
Bdiv_004940c	5.20295e-16	1.72543	0.435	0.111	1.0947e-12	MC	Bdiv-004940c	Bbig
Bdiv_031200c	1.97571e-15	1.51617	0.532	0.156	4.1569e-12	MC	Bdiv-031200c	Bbig
Bdiv_006110	1.11731e-14	1.40421	0.774	0.358	2.35081e-11	MC	Bdiv-006110	Bbig
Bdiv_025310	2.84342e-14	1.52561	0.371	0.087	5.98256e-11	MC	Bdiv-025310	Bbig
Bdiv_036720c	3.09145e-14	1.80387	0.355	0.083	6.50442e-11	MC	Bdiv-036720c	Bbig
Bdiv_016470c	8.34033e-14	1.71739	0.435	0.122	1.75481e-10	MC	Bdiv-016470c	Bbig
Bdiv_034910c	3.11118e-13	1.42037	0.484	0.143	6.54592e-10	MC	Bdiv-034910c	Bbig
Bdiv_000940c	3.87072e-13	1.40183	0.581	0.206	8.14399e-10	MC	Bdiv-000940c	Bbig
Bdiv_007730c	5.08634e-13	1.06611	0.903	0.61	1.07017e-09	MC	Bdiv-007730c	Bbig
Bdiv_011270c	6.82076e-13	1.49652	0.661	0.268	1.43509e-09	MC	Bdiv-011270c	Bbig
Bdiv_034370	2.40231e-12	1.59626	0.516	0.18	5.05446e-09	MC	Bdiv-034370	Bbig
Bdiv_037320c	1.92673e-11	1.11927	0.468	0.144	4.05385e-08	MC	Bdiv-037320c	Bbig
Bdiv_018790	5.28637e-11	1.3041	0.597	0.246	1.11225e-07	MC	Bdiv-018790	Bbig
Bdiv_013520c	8.24584e-11	1.26551	0.677	0.296	1.73493e-07	MC	Bdiv-013520c	Bbig
Bdiv_020210c	9.68594e-11	1.17848	0.677	0.308	2.03792e-07	MC	Bdiv-020210c	Bbig
Bdiv_020680c	1.83078e-10	1.42145	0.548	0.227	3.85196e-07	MC	Bdiv-020680c	Bbig
Bdiv_017800	2.80183e-10	1.54506	0.355	0.105	5.89504e-07	MC	Bdiv-017800	Bbig
Bdiv_018820c	2.97447e-10	1.31441	0.387	0.12	6.25828e-07	MC	Bdiv-018820c	Bbig
Bdiv_030890	6.24835e-10	1.38342	0.419	0.141	1.31465e-06	MC	Bdiv-030890	Bbig
Bdiv_002520c	1.04474e-09	1.41252	0.403	0.142	2.19814e-06	MC	Bdiv-002520c	Bbig
Bdiv_016480	3.19685e-09	1.17607	0.387	0.127	6.72617e-06	MC	Bdiv-016480	Bbig
Bdiv_037690c	3.84865e-09	1.02428	0.726	0.392	8.09757e-06	MC	Bdiv-037690c	Bbig
Bdiv_002160	3.85257e-09	1.16558	0.613	0.292	8.1058e-06	MC	Bdiv-002160	Bbig
Bdiv_028100	4.09539e-09	1.1238	0.484	0.186	8.6167e-06	MC	Bdiv-028100	Bbig
Bdiv_037760	5.87587e-09	1.31443	0.419	0.151	1.23628e-05	MC	Bdiv-037760	Bbig
Bdiv_023110	8.59888e-09	1.20186	0.355	0.115	1.8092e-05	MC	Bdiv-023110	Bbig
Bdiv_040240c	1.42926e-08	1.23722	0.516	0.224	3.00715e-05	MC	Bdiv-040240c	Bbig
Bdiv_010430c	1.74112e-08	1.13429	0.565	0.269	3.66331e-05	MC	Bdiv-010430c	Bbig
Bdiv_003530	2.11517e-08	1.33645	0.339	0.112	4.45032e-05	MC	Bdiv-003530	Bbig
Bdiv_037060c	4.44365e-08	1.28521	0.565	0.313	9.34945e-05	MC	Bdiv-037060c	Bbig
Bdiv_009050c	7.11705e-08	1.05075	0.532	0.236	0.000149743	MC	Bdiv-009050c	Bbig
Bdiv_011700c	8.50176e-08	1.0278	0.242	0.065	0.000178877	MC	Bdiv-011700c	Bbig
Bdiv_010930c	9.64996e-08	1.19723	0.532	0.256	0.000203035	MC	Bdiv-010930c	Bbig
Bdiv_037960	1.29018e-07	1.04147	0.435	0.173	0.000271454	MC	Bdiv-037960	Bbig
Bdiv_005910c	1.36143e-07	1.47378	0.306	0.101	0.000286446	MC	Bdiv-005910c	Bbig
Bdiv_005000c	2.49391e-07	1.05453	0.468	0.194	0.000524719	MC	Bdiv-005000c	Bbig
Bdiv_033360c	2.52192e-07	1.07792	0.387	0.147	0.000530612	MC	Bdiv-033360c	Bbig
Bdiv_035370	9.05838e-07	1.16219	0.274	0.093	0.00190588	MC	Bdiv-035370	Bbig
Bdiv_003300c	1.17481e-06	1.25497	0.177	0.046	0.00247179	MC	Bdiv-003300c	Bbig
Bdiv_019640c	3.82152e-06	1.06101	0.355	0.145	0.00804048	MC	Bdiv-019640c	Bbig

## Sheet: Bbov cell cycle markers
GeneID	p_val	avg_log2FC	pct.1	pct.2	p_val_adj	cluster	gene	spp
Bdiv_028030	0	5.92794	0.956	0.113	0	C	Bdiv-028030	Bbov
Bdiv_028330	0	4.89937	0.943	0.071	0	C	Bdiv-028330	Bbov
Bdiv_034310c	0	4.66064	0.965	0.128	0	C	Bdiv-034310c	Bbov
Bdiv_013880c	0	4.23614	0.71	0.052	0	C	Bdiv-013880c	Bbov
Bdiv_010240c	0	3.61792	0.597	0.036	0	C	Bdiv-010240c	Bbov
Bdiv_023990c	0	3.26521	0.608	0.051	0	C	Bdiv-023990c	Bbov
Bdiv_013580c	9.12981e-292	2.2186	0.968	0.707	2.07977e-288	C	Bdiv-013580c	Bbov
Bdiv_003870c	2.59179e-282	2.3796	0.894	0.441	5.90409e-279	C	Bdiv-003870c	Bbov
Bdiv_009230c	3.86621e-275	2.14344	0.986	0.828	8.80722e-272	C	Bdiv-009230c	Bbov
Bdiv_024360	5.27487e-262	3.23273	0.727	0.181	1.20162e-258	C	Bdiv-024360	Bbov
Bdiv_009180	3.18065e-224	1.89997	0.992	0.852	7.24552e-221	C	Bdiv-009180	Bbov
Bdiv_012790	2.87188e-205	1.67859	0.926	0.706	6.54213e-202	C	Bdiv-012790	Bbov
Bdiv_004890c	2.36002e-172	1.43963	0.916	0.688	5.37612e-169	C	Bdiv-004890c	Bbov
Bdiv_002320c	3.67886e-137	1.74415	0.692	0.303	8.38044e-134	C	Bdiv-002320c	Bbov
Bdiv_006490c	1.29527e-132	1.75185	0.693	0.323	2.95061e-129	C	Bdiv-006490c	Bbov
Bdiv_037320c	1.0374e-120	2.44348	0.297	0.034	2.36321e-117	C	Bdiv-037320c	Bbov
Bdiv_036750c	4.61845e-118	1.70282	0.622	0.256	1.05208e-114	C	Bdiv-036750c	Bbov
Bdiv_019460c	1.36352e-116	1.63445	0.535	0.153	3.1061e-113	C	Bdiv-019460c	Bbov
Bdiv_010590	2.40851e-112	1.13065	0.899	0.792	5.48658e-109	C	Bdiv-010590	Bbov
Bdiv_035640	1.61692e-90	1.51911	0.619	0.342	3.68335e-87	C	Bdiv-035640	Bbov
Bdiv_011690	6.19089e-85	1.43088	0.643	0.381	1.41029e-81	C	Bdiv-011690	Bbov
Bdiv_035870	2.80763e-81	1.72065	0.504	0.227	6.39577e-78	C	Bdiv-035870	Bbov
Bdiv_033990c	3.25991e-81	1.61891	0.466	0.169	7.42607e-78	C	Bdiv-033990c	Bbov
Bdiv_032180c	1.32741e-72	1.19802	0.631	0.366	3.02384e-69	C	Bdiv-032180c	Bbov
Bdiv_024660c	2.50436e-69	1.73736	0.218	0.037	5.70494e-66	C	Bdiv-024660c	Bbov
Bdiv_008860	1.11766e-67	1.16694	0.662	0.438	2.54602e-64	C	Bdiv-008860	Bbov
Bdiv_002410c	1.09792e-65	1.00994	0.738	0.534	2.50107e-62	C	Bdiv-002410c	Bbov
Bdiv_010580c	1.36793e-65	1.11966	0.655	0.446	3.11615e-62	C	Bdiv-010580c	Bbov
Bdiv_017200	1.52029e-64	1.2213	0.638	0.429	3.46322e-61	C	Bdiv-017200	Bbov
Bdiv_021830	5.12705e-54	1.35386	0.47	0.248	1.16794e-50	C	Bdiv-021830	Bbov
Bdiv_016220	9.18996e-51	1.27399	0.476	0.272	2.09347e-47	C	Bdiv-016220	Bbov
Bdiv_013440	5.86674e-44	1.00914	0.575	0.395	1.33644e-40	C	Bdiv-013440	Bbov
Bdiv_018790	5.19677e-43	1.05672	0.455	0.24	1.18382e-39	C	Bdiv-018790	Bbov
Bdiv_011610c	5.6582e-41	1.24555	0.446	0.269	1.28894e-37	C	Bdiv-011610c	Bbov
Bdiv_001930c	4.97362e-36	1.48233	0.19	0.058	1.13299e-32	C	Bdiv-001930c	Bbov
Bdiv_007600	5.02784e-36	1.07277	0.487	0.328	1.14534e-32	C	Bdiv-007600	Bbov
Bdiv_039740	1.14045e-35	1.42135	0.181	0.053	2.59795e-32	C	Bdiv-039740	Bbov
Bdiv_022850c	2.3105e-31	1.07749	0.469	0.328	5.26331e-28	C	Bdiv-022850c	Bbov
Bdiv_027410	3.25579e-30	1.07324	0.423	0.269	7.41669e-27	C	Bdiv-027410	Bbov
Bdiv_020190c	1.43961e-29	1.07675	0.378	0.228	3.27944e-26	C	Bdiv-020190c	Bbov
Bdiv_033310c	1.41333e-23	1.10348	0.33	0.203	3.21956e-20	C	Bdiv-033310c	Bbov
Bdiv_040540	4.99423e-23	1.199	0.243	0.125	1.13768e-19	C	Bdiv-040540	Bbov
Bdiv_030490c	3.57136e-21	1.17827	0.143	0.052	8.13556e-18	C	Bdiv-030490c	Bbov
Bdiv_005830c	4.8207e-18	1.0352	0.316	0.212	1.09816e-14	C	Bdiv-005830c	Bbov
Bdiv_005280c	8.89529e-18	1.11884	0.234	0.133	2.02635e-14	C	Bdiv-005280c	Bbov
Bdiv_004100c	2.12888e-15	1.09677	0.218	0.126	4.84958e-12	C	Bdiv-004100c	Bbov
Bdiv_036790c	2.58061e-15	1.10627	0.187	0.097	5.87863e-12	C	Bdiv-036790c	Bbov
Bdiv_010370	5.39363e-15	1.09674	0.148	0.069	1.22867e-11	C	Bdiv-010370	Bbov
Bdiv_005540	8.12994e-14	1.28247	0.157	0.078	1.852e-10	C	Bdiv-005540	Bbov
Bdiv_015730c	1.5591e-13	1.01186	0.139	0.065	3.55163e-10	C	Bdiv-015730c	Bbov
Bdiv_025340c	2.51557e-84	3.22837	0.884	0.121	5.73048e-81	MC	Bdiv-025340c	Bbov
Bdiv_031200c	4.26044e-57	2.80315	0.913	0.202	9.70528e-54	MC	Bdiv-031200c	Bbov
Bdiv_019460c	1.91488e-54	2.82509	0.928	0.232	4.3621e-51	MC	Bdiv-019460c	Bbov
Bdiv_037800c	6.03294e-50	2.82943	0.841	0.201	1.3743e-46	MC	Bdiv-037800c	Bbov
Bdiv_038160c	2.28913e-48	2.76002	0.768	0.163	5.21465e-45	MC	Bdiv-038160c	Bbov
Bdiv_040360	9.81775e-48	2.8881	1	0.38	2.23648e-44	MC	Bdiv-040360	Bbov
Bdiv_030890	3.51056e-44	2.64455	0.899	0.26	7.99706e-41	MC	Bdiv-030890	Bbov
Bdiv_028170c	1.53249e-40	2.47454	0.768	0.193	3.49101e-37	MC	Bdiv-028170c	Bbov
Bdiv_005540	1.1203e-39	2.78062	0.536	0.088	2.55205e-36	MC	Bdiv-005540	Bbov
Bdiv_039410c	1.32581e-36	2.48191	0.739	0.19	3.02019e-33	MC	Bdiv-039410c	Bbov
Bdiv_038320	2.64582e-36	2.70669	0.942	0.526	6.02719e-33	MC	Bdiv-038320	Bbov
Bdiv_006100	6.83732e-35	2.00669	0.986	0.52	1.55754e-31	MC	Bdiv-006100	Bbov
Bdiv_033990c	1.10237e-34	2.32824	0.783	0.231	2.51119e-31	MC	Bdiv-033990c	Bbov
Bdiv_015420c	5.29561e-33	2.30771	0.739	0.212	1.20634e-29	MC	Bdiv-015420c	Bbov
Bdiv_009180	6.87557e-32	2.01842	0.986	0.884	1.56625e-28	MC	Bdiv-009180	Bbov
Bdiv_009230c	7.92914e-32	1.7747	1	0.864	1.80626e-28	MC	Bdiv-009230c	Bbov
Bdiv_004410c	8.24524e-31	1.58737	1	0.868	1.87827e-27	MC	Bdiv-004410c	Bbov
Bdiv_024360	1.1033e-30	1.58181	0.928	0.302	2.51332e-27	MC	Bdiv-024360	Bbov
Bdiv_005460c	6.11367e-30	1.68941	0.986	0.838	1.39269e-26	MC	Bdiv-005460c	Bbov
Bdiv_012980	8.2759e-30	1.90468	0.957	0.68	1.88525e-26	MC	Bdiv-012980	Bbov
Bdiv_017800	1.15068e-29	2.22686	0.768	0.265	2.62124e-26	MC	Bdiv-017800	Bbov
Bdiv_025010	1.08585e-26	2.24171	0.797	0.308	2.47356e-23	MC	Bdiv-025010	Bbov
Bdiv_031730c	1.04587e-25	1.52274	1	0.715	2.3825e-22	MC	Bdiv-031730c	Bbov
Bdiv_002520c	3.41074e-25	2.14417	0.826	0.4	7.76967e-22	MC	Bdiv-002520c	Bbov
Bdiv_002160	6.02339e-24	1.28039	0.986	0.956	1.37213e-20	MC	Bdiv-002160	Bbov
Bdiv_013580c	1.97631e-23	1.48238	0.986	0.766	4.50204e-20	MC	Bdiv-013580c	Bbov
Bdiv_023270	2.42318e-23	1.98794	0.754	0.3	5.52001e-20	MC	Bdiv-023270	Bbov
Bdiv_018420c	2.57338e-23	1.96075	0.797	0.372	5.86216e-20	MC	Bdiv-018420c	Bbov
Bdiv_007890	2.62058e-22	1.05906	1	0.967	5.96969e-19	MC	Bdiv-007890	Bbov
Bdiv_002680c	8.97711e-22	1.81899	0.826	0.441	2.04499e-18	MC	Bdiv-002680c	Bbov
Bdiv_002150c	8.418e-21	1.75303	0.826	0.456	1.91762e-17	MC	Bdiv-002150c	Bbov
Bdiv_001220	1.90106e-19	2.12422	0.478	0.132	4.33062e-16	MC	Bdiv-001220	Bbov
Bdiv_002420	6.54693e-18	1.35469	0.942	0.813	1.49139e-14	MC	Bdiv-002420	Bbov
Bdiv_011550	3.91734e-17	1.79729	0.377	0.087	8.9237e-14	MC	Bdiv-011550	Bbov
Bdiv_028100	6.58541e-17	1.58864	0.739	0.337	1.50016e-13	MC	Bdiv-028100	Bbov
Bdiv_001120c	7.38223e-16	1.26467	0.87	0.639	1.68167e-12	MC	Bdiv-001120c	Bbov
Bdiv_020480	4.39935e-15	1.38687	0.812	0.48	1.00217e-11	MC	Bdiv-020480	Bbov
Bdiv_016010	1.14286e-14	1.28769	0.725	0.327	2.60344e-11	MC	Bdiv-016010	Bbov
Bdiv_027250	6.68946e-13	1.59228	0.551	0.231	1.52386e-09	MC	Bdiv-027250	Bbov
Bdiv_009050c	2.25551e-12	1.09328	0.884	0.737	5.13805e-09	MC	Bdiv-009050c	Bbov
Bdiv_004940c	4.8037e-12	1.41732	0.638	0.325	1.09428e-08	MC	Bdiv-004940c	Bbov
Bdiv_018790	8.63093e-12	1.60757	0.565	0.287	1.96613e-08	MC	Bdiv-018790	Bbov
Bdiv_037500	1.41421e-11	1.67776	0.348	0.107	3.22158e-08	MC	Bdiv-037500	Bbov
Bdiv_000950	1.76964e-11	1.1315	0.899	0.751	4.03124e-08	MC	Bdiv-000950	Bbov
Bdiv_006130c	2.41825e-11	1.71742	0.391	0.138	5.50876e-08	MC	Bdiv-006130c	Bbov
Bdiv_032180c	3.85075e-11	1.46858	0.681	0.425	8.77202e-08	MC	Bdiv-032180c	Bbov
Bdiv_034350c	1.10625e-10	1.62073	0.507	0.241	2.52003e-07	MC	Bdiv-034350c	Bbov
Bdiv_036750c	1.11105e-10	1.35195	0.623	0.34	2.53098e-07	MC	Bdiv-036750c	Bbov
Bdiv_022790	6.2343e-10	1.33275	0.667	0.415	1.42017e-06	MC	Bdiv-022790	Bbov
Bdiv_033380	7.33694e-10	2.07351	0.333	0.119	1.67135e-06	MC	Bdiv-033380	Bbov
Bdiv_016990c	7.87894e-10	1.48713	0.493	0.226	1.79482e-06	MC	Bdiv-016990c	Bbov
Bdiv_040350c	1.36358e-09	1.64344	0.174	0.035	3.10624e-06	MC	Bdiv-040350c	Bbov
Bdiv_021000c	9.38456e-09	1.44443	0.478	0.229	2.1378e-05	MC	Bdiv-021000c	Bbov
Bdiv_006490c	1.00826e-08	1.15409	0.667	0.408	2.29682e-05	MC	Bdiv-006490c	Bbov
Bdiv_031680c	2.55571e-08	1.03853	0.696	0.513	5.82192e-05	MC	Bdiv-031680c	Bbov
Bdiv_039910c	8.48855e-07	1.21285	0.565	0.376	0.00193369	MC	Bdiv-039910c	Bbov
Bdiv_022230c	1.44762e-06	1.09536	0.507	0.29	0.00329768	MC	Bdiv-022230c	Bbov
Bdiv_024650c	1.60644e-06	1.18729	0.522	0.348	0.00365947	MC	Bdiv-024650c	Bbov
Bdiv_037960	0	3.53639	0.694	0.065	0	SM	Bdiv-037960	Bbov
Bdiv_016010	0	3.19061	0.731	0.073	0	SM	Bdiv-016010	Bbov
Bdiv_031730c	0	2.82747	0.999	0.537	0	SM	Bdiv-031730c	Bbov
Bdiv_006100	0	2.33395	0.894	0.288	0	SM	Bdiv-006100	Bbov
Bdiv_005460c	0	1.9311	0.997	0.738	0	SM	Bdiv-005460c	Bbov
Bdiv_004410c	0	1.85376	0.998	0.787	0	SM	Bdiv-004410c	Bbov
Bdiv_013030c	8.00419e-297	3.02085	0.592	0.048	1.82335e-293	SM	Bdiv-013030c	Bbov
Bdiv_022790	2.29813e-294	2.43166	0.772	0.187	5.23514e-291	SM	Bdiv-022790	Bbov
Bdiv_034370	3.74441e-288	2.83063	0.607	0.063	8.52977e-285	SM	Bdiv-034370	Bbov
Bdiv_002780c	8.82201e-266	2.10061	0.81	0.285	2.00965e-262	SM	Bdiv-002780c	Bbov
Bdiv_020480	6.3596e-265	2.12839	0.816	0.269	1.44872e-261	SM	Bdiv-020480	Bbov
Bdiv_000290c	1.06169e-264	2.73697	0.565	0.054	2.41852e-261	SM	Bdiv-000290c	Bbov
Bdiv_012980	3.12708e-263	1.55907	0.95	0.51	7.12349e-260	SM	Bdiv-012980	Bbov
Bdiv_015020c	4.9372e-247	2.98528	0.477	0.019	1.12469e-243	SM	Bdiv-015020c	Bbov
Bdiv_000810	8.73744e-244	2.68416	0.538	0.054	1.99039e-240	SM	Bdiv-000810	Bbov
Bdiv_024900c	4.47292e-242	3.10031	0.452	0.011	1.01893e-238	SM	Bdiv-024900c	Bbov
Bdiv_015820c	2.98186e-238	2.37818	0.624	0.116	6.79267e-235	SM	Bdiv-015820c	Bbov
Bdiv_005000c	5.93804e-238	1.89433	0.819	0.324	1.35269e-234	SM	Bdiv-005000c	Bbov
Bdiv_027570c	1.53352e-231	3.04637	0.483	0.037	3.49336e-228	SM	Bdiv-027570c	Bbov
Bdiv_035230	2.45088e-229	2.51478	0.558	0.079	5.58311e-226	SM	Bdiv-035230	Bbov
Bdiv_016330	1.1701e-228	2.65062	0.551	0.077	2.6655e-225	SM	Bdiv-016330	Bbov
Bdiv_033980	6.48336e-226	1.70087	0.946	0.613	1.47691e-222	SM	Bdiv-033980	Bbov
Bdiv_017140	1.23804e-222	1.74387	0.815	0.372	2.82027e-219	SM	Bdiv-017140	Bbov
Bdiv_038990c	1.64295e-222	2.73262	0.44	0.019	3.74264e-219	SM	Bdiv-038990c	Bbov
Bdiv_016060	4.71666e-221	2.65891	0.458	0.028	1.07446e-217	SM	Bdiv-016060	Bbov
Bdiv_035340c	9.82456e-221	2.46334	0.521	0.062	2.23803e-217	SM	Bdiv-035340c	Bbov
Bdiv_021000c	5.86033e-220	2.47841	0.509	0.052	1.33498e-216	SM	Bdiv-021000c	Bbov
Bdiv_023290c	9.97854e-218	2.60238	0.501	0.05	2.27311e-214	SM	Bdiv-023290c	Bbov
Bdiv_039980c	6.37403e-211	1.08911	0.967	0.734	1.452e-207	SM	Bdiv-039980c	Bbov
Bdiv_034020c	2.21953e-201	1.58617	0.842	0.421	5.05608e-198	SM	Bdiv-034020c	Bbov
Bdiv_000940c	7.63788e-199	2.4664	0.624	0.169	1.73991e-195	SM	Bdiv-000940c	Bbov
Bdiv_028420	1.62714e-198	1.22873	0.915	0.618	3.70662e-195	SM	Bdiv-028420	Bbov
Bdiv_000760c	2.12878e-198	2.51354	0.426	0.03	4.84937e-195	SM	Bdiv-000760c	Bbov
Bdiv_032630c	5.08242e-195	1.13336	0.938	0.676	1.15778e-191	SM	Bdiv-032630c	Bbov
Bdiv_036720c	3.16984e-190	2.42506	0.4	0.022	7.2209e-187	SM	Bdiv-036720c	Bbov
Bdiv_023260c	1.87264e-188	2.50899	0.461	0.055	4.26587e-185	SM	Bdiv-023260c	Bbov
Bdiv_011800	2.99636e-185	2.59663	0.451	0.052	6.8257e-182	SM	Bdiv-011800	Bbov
Bdiv_006420	9.80478e-184	2.34623	0.412	0.032	2.23353e-180	SM	Bdiv-006420	Bbov
Bdiv_009780c	8.29993e-183	2.4324	0.416	0.037	1.89072e-179	SM	Bdiv-009780c	Bbov
Bdiv_011270c	7.44978e-182	1.92672	0.619	0.173	1.69706e-178	SM	Bdiv-011270c	Bbov
Bdiv_023730	2.62245e-180	1.07105	0.933	0.692	5.97394e-177	SM	Bdiv-023730	Bbov
Bdiv_016990c	3.98718e-180	2.12951	0.478	0.067	9.0828e-177	SM	Bdiv-016990c	Bbov
Bdiv_016250	1.14124e-178	2.17488	0.514	0.101	2.59975e-175	SM	Bdiv-016250	Bbov
Bdiv_035010c	7.97133e-177	2.0869	0.657	0.213	1.81587e-173	SM	Bdiv-035010c	Bbov
Bdiv_028100	2.89599e-176	1.94516	0.613	0.169	6.59707e-173	SM	Bdiv-028100	Bbov
Bdiv_040500	5.14518e-174	2.51786	0.472	0.074	1.17207e-170	SM	Bdiv-040500	Bbov
Bdiv_034180	1.74167e-171	2.43272	0.478	0.085	3.96752e-168	SM	Bdiv-034180	Bbov
Bdiv_005110	8.18827e-168	2.33927	0.369	0.025	1.86529e-164	SM	Bdiv-005110	Bbov
Bdiv_013310c	5.74525e-167	2.1298	0.485	0.09	1.30877e-163	SM	Bdiv-013310c	Bbov
Bdiv_031070	2.11323e-166	2.25701	0.376	0.029	4.81393e-163	SM	Bdiv-031070	Bbov
Bdiv_000370c	3.4384e-162	2.53855	0.417	0.054	7.83267e-159	SM	Bdiv-000370c	Bbov
Bdiv_039600	3.35827e-160	2.18369	0.385	0.039	7.65013e-157	SM	Bdiv-039600	Bbov
Bdiv_010170c	3.13024e-159	2.48019	0.374	0.034	7.13068e-156	SM	Bdiv-010170c	Bbov
Bdiv_021690c	3.63088e-159	2.15411	0.431	0.063	8.27115e-156	SM	Bdiv-021690c	Bbov
Bdiv_002330	5.20373e-158	1.84722	0.576	0.167	1.18541e-154	SM	Bdiv-002330	Bbov
Bdiv_009740	7.96752e-158	2.28707	0.367	0.031	1.815e-154	SM	Bdiv-009740	Bbov
Bdiv_038490	2.88059e-157	1.343	0.807	0.468	6.56197e-154	SM	Bdiv-038490	Bbov
Bdiv_004730	3.6578e-157	1.77051	0.59	0.177	8.33246e-154	SM	Bdiv-004730	Bbov
Bdiv_027250	6.63021e-157	2.15619	0.467	0.085	1.51036e-153	SM	Bdiv-027250	Bbov
Bdiv_002520c	2.77532e-155	1.54245	0.677	0.232	6.32217e-152	SM	Bdiv-002520c	Bbov
Bdiv_039100	4.7677e-155	1.04718	0.875	0.65	1.08608e-151	SM	Bdiv-039100	Bbov
Bdiv_001620c	7.20867e-155	1.76547	0.618	0.207	1.64214e-151	SM	Bdiv-001620c	Bbov
Bdiv_037780	3.60777e-151	1.03846	0.86	0.592	8.2185e-148	SM	Bdiv-037780	Bbov
Bdiv_011320	1.3072e-148	1.82343	0.567	0.165	2.9778e-145	SM	Bdiv-011320	Bbov
Bdiv_025310	1.88961e-148	2.43347	0.33	0.021	4.30454e-145	SM	Bdiv-025310	Bbov
Bdiv_039530	1.12049e-146	1.68914	0.609	0.205	2.55247e-143	SM	Bdiv-039530	Bbov
Bdiv_011310c	2.41453e-146	1.64921	0.654	0.249	5.5003e-143	SM	Bdiv-011310c	Bbov
Bdiv_035650	1.65477e-145	2.14621	0.319	0.019	3.76957e-142	SM	Bdiv-035650	Bbov
Bdiv_039920	8.91515e-142	2.51692	0.324	0.024	2.03087e-138	SM	Bdiv-039920	Bbov
Bdiv_005380c	1.64599e-141	1.11798	0.879	0.568	3.74957e-138	SM	Bdiv-005380c	Bbov
Bdiv_011580c	1.11559e-138	2.03376	0.46	0.107	2.54131e-135	SM	Bdiv-011580c	Bbov
Bdiv_022230c	1.24082e-138	1.83433	0.521	0.146	2.82658e-135	SM	Bdiv-022230c	Bbov
Bdiv_014590c	4.339e-134	1.39407	0.74	0.36	9.88423e-131	SM	Bdiv-014590c	Bbov
Bdiv_033630	4.84724e-132	2.08462	0.308	0.024	1.1042e-128	SM	Bdiv-033630	Bbov
Bdiv_001720c	1.27452e-130	1.42576	0.697	0.323	2.90336e-127	SM	Bdiv-001720c	Bbov
Bdiv_000300	5.86103e-129	1.77264	0.417	0.083	1.33514e-125	SM	Bdiv-000300	Bbov
Bdiv_023670	3.04022e-127	1.94383	0.291	0.02	6.92562e-124	SM	Bdiv-023670	Bbov
Bdiv_038700c	6.69912e-125	1.09532	0.876	0.625	1.52606e-121	SM	Bdiv-038700c	Bbov
Bdiv_017300	3.83489e-124	1.9338	0.356	0.052	8.73589e-121	SM	Bdiv-017300	Bbov
Bdiv_040320	3.61035e-123	1.40837	0.651	0.278	8.22438e-120	SM	Bdiv-040320	Bbov
Bdiv_036410	2.21271e-122	1.95866	0.392	0.077	5.04055e-119	SM	Bdiv-036410	Bbov
Bdiv_027810c	2.75787e-122	1.33063	0.694	0.335	6.28243e-119	SM	Bdiv-027810c	Bbov
Bdiv_040360	9.83427e-119	1.61141	0.63	0.236	2.24025e-115	SM	Bdiv-040360	Bbov
Bdiv_010660	4.20496e-118	1.64425	0.521	0.167	9.57891e-115	SM	Bdiv-010660	Bbov
Bdiv_025010	2.70474e-116	1.42164	0.539	0.171	6.16141e-113	SM	Bdiv-025010	Bbov
Bdiv_018420c	2.41607e-114	1.27517	0.608	0.229	5.50381e-111	SM	Bdiv-018420c	Bbov
Bdiv_038320	3.59857e-114	1.09036	0.769	0.379	8.19755e-111	SM	Bdiv-038320	Bbov
Bdiv_002680c	1.27679e-109	1.77793	0.648	0.316	2.90853e-106	SM	Bdiv-002680c	Bbov
Bdiv_009300c	1.80739e-109	1.90965	0.296	0.036	4.11724e-106	SM	Bdiv-009300c	Bbov
Bdiv_030890	1.54302e-108	1.56756	0.479	0.135	3.51499e-105	SM	Bdiv-030890	Bbov
Bdiv_022910c	2.54129e-108	1.80291	0.321	0.049	5.78905e-105	SM	Bdiv-022910c	Bbov
Bdiv_009450	7.9094e-107	1.97515	0.233	0.011	1.80176e-103	SM	Bdiv-009450	Bbov
Bdiv_034350c	1.00124e-105	1.43743	0.441	0.118	2.28083e-102	SM	Bdiv-034350c	Bbov
Bdiv_023440	1.08632e-105	1.80288	0.324	0.054	2.47464e-102	SM	Bdiv-023440	Bbov
Bdiv_030010	3.65847e-104	1.70379	0.335	0.06	8.33399e-101	SM	Bdiv-030010	Bbov
Bdiv_028580c	8.40927e-104	2.16441	0.281	0.036	1.91563e-100	SM	Bdiv-028580c	Bbov
Bdiv_023160	3.53283e-103	2.1848	0.234	0.014	8.04779e-100	SM	Bdiv-023160	Bbov
Bdiv_039580c	3.93262e-103	1.76136	0.269	0.028	8.95852e-100	SM	Bdiv-039580c	Bbov
Bdiv_014150	5.01453e-103	1.87155	0.243	0.017	1.14231e-99	SM	Bdiv-014150	Bbov
Bdiv_032670c	6.90664e-101	1.76052	0.263	0.027	1.57333e-97	SM	Bdiv-032670c	Bbov
Bdiv_038880	1.12284e-98	1.75678	0.314	0.055	2.55783e-95	SM	Bdiv-038880	Bbov
Bdiv_010620	1.05363e-95	2.17129	0.259	0.031	2.40018e-92	SM	Bdiv-010620	Bbov
Bdiv_017690c	1.15052e-95	1.41056	0.489	0.176	2.62089e-92	SM	Bdiv-017690c	Bbov
Bdiv_009770	5.50839e-95	1.91452	0.239	0.022	1.25481e-91	SM	Bdiv-009770	Bbov
Bdiv_032350	6.22767e-95	2.08292	0.262	0.033	1.41866e-91	SM	Bdiv-032350	Bbov
Bdiv_005210c	2.25184e-93	1.56525	0.364	0.09	5.1297e-90	SM	Bdiv-005210c	Bbov
Bdiv_037800c	9.71022e-93	1.58572	0.386	0.098	2.21199e-89	SM	Bdiv-037800c	Bbov
Bdiv_022340	7.14405e-92	1.36325	0.501	0.194	1.62742e-88	SM	Bdiv-022340	Bbov
Bdiv_010130	1.22479e-89	1.60519	0.276	0.043	2.79007e-86	SM	Bdiv-010130	Bbov
Bdiv_008470c	1.45262e-89	1.78389	0.267	0.039	3.30908e-86	SM	Bdiv-008470c	Bbov
Bdiv_016020	1.84602e-87	1.23946	0.549	0.238	4.20524e-84	SM	Bdiv-016020	Bbov
Bdiv_007780	1.22974e-86	1.59235	0.312	0.067	2.80135e-83	SM	Bdiv-007780	Bbov
Bdiv_002590	1.87766e-85	1.35885	0.477	0.183	4.27732e-82	SM	Bdiv-002590	Bbov
Bdiv_037760	3.05436e-84	1.42187	0.394	0.12	6.95783e-81	SM	Bdiv-037760	Bbov
Bdiv_021460c	3.19098e-84	1.45363	0.363	0.1	7.26905e-81	SM	Bdiv-021460c	Bbov
Bdiv_008170c	3.20985e-82	1.73798	0.176	0.006	7.31205e-79	SM	Bdiv-008170c	Bbov
Bdiv_020650	4.95343e-81	1.44198	0.443	0.164	1.12839e-77	SM	Bdiv-020650	Bbov
Bdiv_009990c	9.80772e-81	1.65549	0.278	0.054	2.2342e-77	SM	Bdiv-009990c	Bbov
Bdiv_012330c	1.37049e-80	1.48341	0.372	0.113	3.12198e-77	SM	Bdiv-012330c	Bbov
Bdiv_003890	1.80144e-78	1.44666	0.291	0.062	4.10367e-75	SM	Bdiv-003890	Bbov
Bdiv_020700	1.13528e-76	1.12224	0.553	0.263	2.58616e-73	SM	Bdiv-020700	Bbov
Bdiv_034720	5.95438e-76	1.25078	0.458	0.181	1.35641e-72	SM	Bdiv-034720	Bbov
Bdiv_001550	1.80824e-74	1.13701	0.607	0.342	4.11918e-71	SM	Bdiv-001550	Bbov
Bdiv_015590c	1.91493e-74	1.56107	0.26	0.051	4.3622e-71	SM	Bdiv-015590c	Bbov
Bdiv_039910c	1.30598e-73	1.1033	0.553	0.266	2.97502e-70	SM	Bdiv-039910c	Bbov
Bdiv_008440	2.73689e-73	1.44923	0.197	0.021	6.23463e-70	SM	Bdiv-008440	Bbov
Bdiv_015170	1.70425e-72	1.31825	0.393	0.135	3.88228e-69	SM	Bdiv-015170	Bbov
Bdiv_013770c	5.23786e-72	1.39225	0.237	0.039	1.19318e-68	SM	Bdiv-013770c	Bbov
Bdiv_011450c	6.40612e-72	1.20312	0.522	0.244	1.45931e-68	SM	Bdiv-011450c	Bbov
Bdiv_002150c	2.12448e-69	1.00464	0.638	0.348	4.83958e-66	SM	Bdiv-002150c	Bbov
Bdiv_015180c	2.53634e-69	1.4167	0.237	0.044	5.77779e-66	SM	Bdiv-015180c	Bbov
Bdiv_023540	5.91326e-69	1.50198	0.185	0.019	1.34704e-65	SM	Bdiv-023540	Bbov
Bdiv_015990c	1.5557e-68	1.46007	0.233	0.043	3.54389e-65	SM	Bdiv-015990c	Bbov
Bdiv_036520	1.08167e-66	1.71645	0.198	0.027	2.46404e-63	SM	Bdiv-036520	Bbov
Bdiv_015030	2.21938e-66	1.48764	0.197	0.027	5.05576e-63	SM	Bdiv-015030	Bbov
Bdiv_004940c	7.7108e-66	1.29651	0.492	0.225	1.75652e-62	SM	Bdiv-004940c	Bbov
Bdiv_016090	1.14486e-65	1.33179	0.26	0.06	2.608e-62	SM	Bdiv-016090	Bbov
Bdiv_027100c	1.21957e-65	1.47182	0.197	0.028	2.77818e-62	SM	Bdiv-027100c	Bbov
Bdiv_023560c	1.4598e-65	1.42706	0.174	0.017	3.32543e-62	SM	Bdiv-023560c	Bbov
Bdiv_031200c	1.5087e-65	1.63019	0.358	0.122	3.43682e-62	SM	Bdiv-031200c	Bbov
Bdiv_031650c	5.85267e-65	1.15599	0.428	0.174	1.33324e-61	SM	Bdiv-031650c	Bbov
Bdiv_026840c	2.80168e-63	1.73682	0.268	0.07	6.38222e-60	SM	Bdiv-026840c	Bbov
Bdiv_000590	2.82027e-63	1.25686	0.403	0.161	6.42459e-60	SM	Bdiv-000590	Bbov
Bdiv_002580c	5.95981e-61	1.32846	0.22	0.043	1.35765e-57	SM	Bdiv-002580c	Bbov
Bdiv_000390c	7.04654e-61	1.20788	0.409	0.172	1.6052e-57	SM	Bdiv-000390c	Bbov
Bdiv_005930c	2.45532e-60	1.27721	0.209	0.038	5.59323e-57	SM	Bdiv-005930c	Bbov
Bdiv_007750c	4.51388e-60	1.19124	0.403	0.168	1.02826e-56	SM	Bdiv-007750c	Bbov
Bdiv_016150	8.26194e-60	1.35012	0.142	0.009	1.88207e-56	SM	Bdiv-016150	Bbov
Bdiv_035450	3.0945e-59	1.28816	0.251	0.062	7.04926e-56	SM	Bdiv-035450	Bbov
Bdiv_015160c	1.09352e-58	1.25733	0.2	0.035	2.49104e-55	SM	Bdiv-015160c	Bbov
Bdiv_010360	2.81159e-58	1.25603	0.292	0.089	6.40481e-55	SM	Bdiv-010360	Bbov
Bdiv_030710c	9.95544e-58	1.52449	0.187	0.031	2.26785e-54	SM	Bdiv-030710c	Bbov
Bdiv_015260c	1.78157e-57	1.18461	0.32	0.107	4.05842e-54	SM	Bdiv-015260c	Bbov
Bdiv_039410c	1.98405e-56	1.64075	0.328	0.117	4.51967e-53	SM	Bdiv-039410c	Bbov
Bdiv_026900	3.92406e-56	1.29997	0.253	0.068	8.93901e-53	SM	Bdiv-026900	Bbov
Bdiv_029920	5.83619e-55	1.23374	0.278	0.085	1.32948e-51	SM	Bdiv-029920	Bbov
Bdiv_008540	6.58893e-54	1.18771	0.32	0.116	1.50096e-50	SM	Bdiv-008540	Bbov
Bdiv_017750c	1.35895e-52	1.33587	0.229	0.059	3.09568e-49	SM	Bdiv-017750c	Bbov
Bdiv_024110	1.63094e-52	1.15416	0.216	0.05	3.71529e-49	SM	Bdiv-024110	Bbov
Bdiv_014950	1.9764e-52	1.19113	0.159	0.022	4.50223e-49	SM	Bdiv-014950	Bbov
Bdiv_034330c	7.47721e-52	1.38668	0.276	0.09	1.70331e-48	SM	Bdiv-034330c	Bbov
Bdiv_034230c	8.45784e-52	1.13258	0.239	0.064	1.9267e-48	SM	Bdiv-034230c	Bbov
Bdiv_027130c	1.48778e-51	1.12582	0.139	0.014	3.38915e-48	SM	Bdiv-027130c	Bbov
Bdiv_008100	1.17083e-50	1.1769	0.19	0.038	2.66715e-47	SM	Bdiv-008100	Bbov
Bdiv_001920	1.63617e-50	1.13058	0.363	0.151	3.7272e-47	SM	Bdiv-001920	Bbov
Bdiv_011700c	5.59412e-50	1.23359	0.158	0.024	1.27434e-46	SM	Bdiv-011700c	Bbov
Bdiv_000990c	3.64558e-49	1.14123	0.256	0.079	8.30464e-46	SM	Bdiv-000990c	Bbov
Bdiv_021710c	1.2892e-48	1.08603	0.326	0.126	2.9368e-45	SM	Bdiv-021710c	Bbov
Bdiv_008390c	5.13134e-48	1.08292	0.329	0.13	1.16892e-44	SM	Bdiv-008390c	Bbov
Bdiv_003260	5.34075e-48	1.36403	0.216	0.058	1.21662e-44	SM	Bdiv-003260	Bbov
Bdiv_017800	5.62269e-48	1.04593	0.406	0.188	1.28085e-44	SM	Bdiv-017800	Bbov
Bdiv_029930c	5.70754e-48	1.10395	0.145	0.019	1.30018e-44	SM	Bdiv-029930c	Bbov
Bdiv_007630	7.67279e-48	1.22751	0.185	0.04	1.74786e-44	SM	Bdiv-007630	Bbov
Bdiv_019630	1.02917e-47	1.23264	0.294	0.108	2.34445e-44	SM	Bdiv-019630	Bbov
Bdiv_037770	1.95507e-46	1.08642	0.313	0.119	4.45364e-43	SM	Bdiv-037770	Bbov
Bdiv_035040c	2.11055e-46	1.13038	0.297	0.112	4.80783e-43	SM	Bdiv-035040c	Bbov
Bdiv_017910	2.54363e-46	1.17585	0.285	0.103	5.79438e-43	SM	Bdiv-017910	Bbov
Bdiv_001220	1.19119e-45	1.10437	0.24	0.072	2.71352e-42	SM	Bdiv-001220	Bbov
Bdiv_023820c	2.15107e-44	1.14562	0.197	0.05	4.90013e-41	SM	Bdiv-023820c	Bbov
Bdiv_010080c	2.83631e-44	1.04438	0.324	0.135	6.46112e-41	SM	Bdiv-010080c	Bbov
Bdiv_030600c	4.27286e-44	1.01484	0.314	0.125	9.73357e-41	SM	Bdiv-030600c	Bbov
Bdiv_033960	4.96675e-43	1.0081	0.294	0.115	1.13143e-39	SM	Bdiv-033960	Bbov
Bdiv_000580c	2.21879e-39	1.035	0.268	0.103	5.0544e-36	SM	Bdiv-000580c	Bbov
Bdiv_001070c	1.38787e-38	1.02442	0.205	0.062	3.16156e-35	SM	Bdiv-001070c	Bbov
Bdiv_015780c	3.93553e-36	1.02452	0.205	0.066	8.96515e-33	SM	Bdiv-015780c	Bbov
Bdiv_016910	8.42626e-36	1.00407	0.185	0.056	1.9195e-32	SM	Bdiv-016910	Bbov
Bdiv_020470c	1.21636e-35	1.11122	0.251	0.098	2.77087e-32	SM	Bdiv-020470c	Bbov
Bdiv_001530c	1.60491e-35	1.00169	0.183	0.054	3.656e-32	SM	Bdiv-001530c	Bbov
Bdiv_032340c	1.20578e-34	1.23493	0.262	0.114	2.74678e-31	SM	Bdiv-032340c	Bbov
Bdiv_005040c	2.03816e-34	1.16115	0.125	0.024	4.64294e-31	SM	Bdiv-005040c	Bbov
Bdiv_011550	2.95476e-32	1.28154	0.162	0.047	6.73093e-29	SM	Bdiv-011550	Bbov
Bdiv_024520	0	3.40132	0.927	0.153	0	G	Bdiv-024520	Bbov
Bdiv_021840c	0	2.12729	0.962	0.381	0	G	Bdiv-021840c	Bbov
Bdiv_028150c	1.11161e-263	1.5705	0.946	0.464	2.53225e-260	G	Bdiv-028150c	Bbov
Bdiv_038180c	1.36864e-255	1.85607	0.85	0.341	3.11775e-252	G	Bdiv-038180c	Bbov
Bdiv_023320c	8.4096e-237	2.40881	0.546	0.067	1.91571e-233	G	Bdiv-023320c	Bbov
Bdiv_033640c	7.17534e-227	1.59037	0.877	0.441	1.63454e-223	G	Bdiv-033640c	Bbov
Bdiv_020320c	5.36165e-223	2.0649	0.663	0.152	1.22138e-219	G	Bdiv-020320c	Bbov
Bdiv_037120c	1.52659e-222	1.72831	0.812	0.263	3.47757e-219	G	Bdiv-037120c	Bbov
Bdiv_033730	3.88545e-215	1.39154	0.926	0.492	8.85106e-212	G	Bdiv-033730	Bbov
Bdiv_034880	2.36207e-213	2.30522	0.499	0.059	5.38081e-210	G	Bdiv-034880	Bbov
Bdiv_034500	7.04274e-207	1.65374	0.81	0.312	1.60434e-203	G	Bdiv-034500	Bbov
Bdiv_024560c	2.62039e-204	1.27961	0.943	0.577	5.96925e-201	G	Bdiv-024560c	Bbov
Bdiv_017350	2.78317e-202	1.39518	0.912	0.459	6.34005e-199	G	Bdiv-017350	Bbov
Bdiv_014020c	3.57068e-196	2.01709	0.559	0.105	8.134e-193	G	Bdiv-014020c	Bbov
Bdiv_003910c	6.13858e-185	1.13796	0.965	0.753	1.39837e-181	G	Bdiv-003910c	Bbov
Bdiv_039290c	2.19677e-178	1.37644	0.849	0.416	5.00424e-175	G	Bdiv-039290c	Bbov
Bdiv_016320	2.59703e-178	1.59256	0.746	0.278	5.91603e-175	G	Bdiv-016320	Bbov
Bdiv_013230	2.59418e-172	1.35959	0.852	0.472	5.90954e-169	G	Bdiv-013230	Bbov
Bdiv_036490c	9.61724e-172	1.72377	0.656	0.206	2.19081e-168	G	Bdiv-036490c	Bbov
Bdiv_036320c	1.40809e-171	1.75007	0.581	0.135	3.20763e-168	G	Bdiv-036320c	Bbov
Bdiv_038560c	9.26325e-170	1.89403	0.528	0.111	2.11017e-166	G	Bdiv-038560c	Bbov
Bdiv_005180c	8.44198e-164	1.92778	0.437	0.062	1.92308e-160	G	Bdiv-005180c	Bbov
Bdiv_005620c	1.1322e-162	2.1733	0.338	0.021	2.57914e-159	G	Bdiv-005620c	Bbov
Bdiv_002640	2.56894e-159	1.76732	0.563	0.149	5.85204e-156	G	Bdiv-002640	Bbov
Bdiv_008590	2.728e-159	1.98416	0.412	0.054	6.21439e-156	G	Bdiv-008590	Bbov
Bdiv_010450	6.80645e-158	1.77857	0.572	0.155	1.55051e-154	G	Bdiv-010450	Bbov
Bdiv_033760	4.56594e-156	1.58762	0.673	0.242	1.04012e-152	G	Bdiv-033760	Bbov
Bdiv_024470c	2.73069e-153	1.72707	0.532	0.12	6.22051e-150	G	Bdiv-024470c	Bbov
Bdiv_008580c	2.34999e-152	1.9573	0.432	0.071	5.35328e-149	G	Bdiv-008580c	Bbov
Bdiv_040460	4.9122e-151	1.29631	0.783	0.321	1.119e-147	G	Bdiv-040460	Bbov
Bdiv_014040	1.66155e-148	1.77747	0.443	0.077	3.78501e-145	G	Bdiv-014040	Bbov
Bdiv_021260	1.01927e-147	1.18171	0.854	0.443	2.32189e-144	G	Bdiv-021260	Bbov
Bdiv_024130	2.7205e-144	1.03008	0.914	0.634	6.19729e-141	G	Bdiv-024130	Bbov
Bdiv_027330	6.37636e-136	1.45349	0.648	0.249	1.45254e-132	G	Bdiv-027330	Bbov
Bdiv_025470	1.60018e-134	1.07818	0.914	0.528	3.64521e-131	G	Bdiv-025470	Bbov
Bdiv_016310c	7.8333e-134	1.38445	0.67	0.263	1.78442e-130	G	Bdiv-016310c	Bbov
Bdiv_002900c	1.42042e-133	1.14467	0.836	0.477	3.23573e-130	G	Bdiv-002900c	Bbov
Bdiv_025260c	1.05403e-114	1.01173	0.762	0.348	2.40108e-111	G	Bdiv-025260c	Bbov
Bdiv_017290	1.34403e-111	1.75966	0.332	0.054	3.0617e-108	G	Bdiv-017290	Bbov
Bdiv_022650	2.91818e-111	1.14692	0.656	0.26	6.64763e-108	G	Bdiv-022650	Bbov
Bdiv_016410c	3.79481e-109	1.15081	0.683	0.301	8.64457e-106	G	Bdiv-016410c	Bbov
Bdiv_001970c	2.65532e-107	1.6857	0.321	0.053	6.04883e-104	G	Bdiv-001970c	Bbov
Bdiv_020550c	3.31435e-105	1.2076	0.639	0.272	7.55008e-102	G	Bdiv-020550c	Bbov
Bdiv_029570	1.21828e-104	1.25285	0.59	0.217	2.77525e-101	G	Bdiv-029570	Bbov
Bdiv_035350c	1.18671e-103	1.30907	0.527	0.179	2.70332e-100	G	Bdiv-035350c	Bbov
Bdiv_027290c	1.028e-102	1.3967	0.449	0.126	2.34179e-99	G	Bdiv-027290c	Bbov
Bdiv_029020c	5.86301e-100	1.03586	0.738	0.367	1.33559e-96	G	Bdiv-029020c	Bbov
Bdiv_002800c	2.015e-95	1.55116	0.294	0.048	4.59016e-92	G	Bdiv-002800c	Bbov
Bdiv_036680c	5.42143e-95	1.60807	0.323	0.065	1.235e-91	G	Bdiv-036680c	Bbov
Bdiv_025380c	1.19215e-92	1.30505	0.517	0.195	2.71571e-89	G	Bdiv-025380c	Bbov
Bdiv_034130c	7.00253e-92	1.39167	0.44	0.139	1.59518e-88	G	Bdiv-034130c	Bbov
Bdiv_002510c	1.13925e-91	1.25853	0.551	0.223	2.59521e-88	G	Bdiv-002510c	Bbov
Bdiv_036440	6.55255e-91	1.40949	0.369	0.092	1.49267e-87	G	Bdiv-036440	Bbov
Bdiv_015400	6.91272e-89	1.5073	0.295	0.055	1.57472e-85	G	Bdiv-015400	Bbov
Bdiv_004850	1.68936e-88	1.49476	0.287	0.052	3.84835e-85	G	Bdiv-004850	Bbov
Bdiv_014220	9.01324e-88	1.43865	0.344	0.081	2.05322e-84	G	Bdiv-014220	Bbov
Bdiv_032260c	3.17512e-87	1.36421	0.402	0.116	7.23292e-84	G	Bdiv-032260c	Bbov
Bdiv_000800c	4.22818e-87	1.46178	0.327	0.075	9.63179e-84	G	Bdiv-000800c	Bbov
Bdiv_000840c	7.96608e-87	1.15851	0.551	0.227	1.81467e-83	G	Bdiv-000840c	Bbov
Bdiv_030970	2.04298e-86	1.40678	0.387	0.109	4.6539e-83	G	Bdiv-030970	Bbov
Bdiv_006430	1.15228e-85	1.31286	0.402	0.116	2.62488e-82	G	Bdiv-006430	Bbov
Bdiv_014000	1.39775e-85	1.06008	0.671	0.342	3.18408e-82	G	Bdiv-014000	Bbov
Bdiv_005370c	2.33692e-85	1.18126	0.51	0.196	5.32349e-82	G	Bdiv-005370c	Bbov
Bdiv_023170	3.87557e-85	1.4588	0.303	0.063	8.82854e-82	G	Bdiv-023170	Bbov
Bdiv_020990c	9.46781e-85	1.34331	0.35	0.088	2.15677e-81	G	Bdiv-020990c	Bbov
Bdiv_031010c	1.70168e-83	1.01274	0.704	0.368	3.87643e-80	G	Bdiv-031010c	Bbov
Bdiv_037990c	2.30991e-81	1.41131	0.285	0.056	5.26197e-78	G	Bdiv-037990c	Bbov
Bdiv_003390	8.70153e-80	1.27512	0.39	0.118	1.98221e-76	G	Bdiv-003390	Bbov
Bdiv_033520c	2.99995e-79	1.36371	0.384	0.121	6.83388e-76	G	Bdiv-033520c	Bbov
Bdiv_002920	3.10105e-79	1.28665	0.378	0.114	7.06419e-76	G	Bdiv-002920	Bbov
Bdiv_008880c	2.55091e-78	1.37991	0.358	0.106	5.81096e-75	G	Bdiv-008880c	Bbov
Bdiv_037130	1.07784e-76	1.12592	0.449	0.162	2.45531e-73	G	Bdiv-037130	Bbov
Bdiv_012960c	1.59487e-76	1.0932	0.5	0.197	3.63312e-73	G	Bdiv-012960c	Bbov
Bdiv_038000	2.58292e-75	1.0585	0.584	0.275	5.88389e-72	G	Bdiv-038000	Bbov
Bdiv_034270c	6.80259e-75	1.10871	0.525	0.226	1.54963e-71	G	Bdiv-034270c	Bbov
Bdiv_009200c	5.61092e-74	1.44664	0.226	0.035	1.27817e-70	G	Bdiv-009200c	Bbov
Bdiv_034360c	7.743e-72	1.27405	0.335	0.096	1.76385e-68	G	Bdiv-034360c	Bbov
Bdiv_027010c	8.85731e-72	1.54131	0.225	0.036	2.01769e-68	G	Bdiv-027010c	Bbov
Bdiv_009140c	5.71272e-71	1.40314	0.228	0.039	1.30136e-67	G	Bdiv-009140c	Bbov
Bdiv_014260c	9.59624e-70	1.09195	0.374	0.115	2.18602e-66	G	Bdiv-014260c	Bbov
Bdiv_028120c	4.98092e-69	1.2033	0.367	0.12	1.13465e-65	G	Bdiv-028120c	Bbov
Bdiv_008960c	5.46277e-69	1.24048	0.27	0.06	1.24442e-65	G	Bdiv-008960c	Bbov
Bdiv_023690c	7.76356e-69	1.21011	0.237	0.043	1.76854e-65	G	Bdiv-023690c	Bbov
Bdiv_034000c	3.45142e-68	1.23685	0.201	0.028	7.86233e-65	G	Bdiv-034000c	Bbov
Bdiv_031550	4.47504e-68	1.28319	0.226	0.04	1.01941e-64	G	Bdiv-031550	Bbov
Bdiv_008350c	9.95469e-68	1.26994	0.227	0.04	2.26768e-64	G	Bdiv-008350c	Bbov
Bdiv_022740	1.84929e-67	1.27136	0.263	0.059	4.21268e-64	G	Bdiv-022740	Bbov
Bdiv_025210	5.67201e-67	1.0611	0.472	0.199	1.29208e-63	G	Bdiv-025210	Bbov
Bdiv_005240c	1.11729e-65	1.19163	0.28	0.068	2.54518e-62	G	Bdiv-005240c	Bbov
Bdiv_018800	1.26557e-65	1.26327	0.219	0.039	2.88297e-62	G	Bdiv-018800	Bbov
Bdiv_013920c	7.67925e-65	1.2764	0.288	0.076	1.74933e-61	G	Bdiv-013920c	Bbov
Bdiv_028300	3.0952e-64	1.12362	0.386	0.14	7.05086e-61	G	Bdiv-028300	Bbov
Bdiv_006400c	6.38895e-64	1.08335	0.266	0.06	1.4554e-60	G	Bdiv-006400c	Bbov
Bdiv_003360	9.17623e-64	1.33797	0.259	0.063	2.09035e-60	G	Bdiv-003360	Bbov
Bdiv_019010	1.17378e-62	1.03932	0.447	0.18	2.67388e-59	G	Bdiv-019010	Bbov
Bdiv_040330	1.92923e-62	1.39276	0.219	0.043	4.39478e-59	G	Bdiv-040330	Bbov
Bdiv_013970	6.59707e-62	1.30382	0.254	0.062	1.50281e-58	G	Bdiv-013970	Bbov
Bdiv_036920c	3.43799e-59	1.12454	0.334	0.112	7.83174e-56	G	Bdiv-036920c	Bbov
Bdiv_006260c	4.98436e-59	1.00262	0.323	0.101	1.13544e-55	G	Bdiv-006260c	Bbov
Bdiv_010750	1.16985e-58	1.26697	0.239	0.058	2.66493e-55	G	Bdiv-010750	Bbov
Bdiv_016240	1.79763e-58	1.09655	0.24	0.055	4.09501e-55	G	Bdiv-016240	Bbov
Bdiv_013370	2.5893e-58	1.23342	0.272	0.077	5.89843e-55	G	Bdiv-013370	Bbov
Bdiv_036550	3.1341e-58	1.30007	0.209	0.041	7.13949e-55	G	Bdiv-036550	Bbov
Bdiv_003760c	9.59659e-58	1.18253	0.164	0.021	2.1861e-54	G	Bdiv-003760c	Bbov
Bdiv_001420c	2.7286e-57	1.20913	0.249	0.062	6.21574e-54	G	Bdiv-001420c	Bbov
Bdiv_018020	1.01673e-56	1.02602	0.37	0.137	2.3161e-53	G	Bdiv-018020	Bbov
Bdiv_023810	1.36904e-56	1.10554	0.202	0.039	3.11868e-53	G	Bdiv-023810	Bbov
Bdiv_014670	3.58533e-56	1.23944	0.255	0.068	8.16737e-53	G	Bdiv-014670	Bbov
Bdiv_033930c	5.55233e-56	1.15515	0.34	0.122	1.26482e-52	G	Bdiv-033930c	Bbov
Bdiv_038060	8.18971e-55	1.18267	0.136	0.012	1.86562e-51	G	Bdiv-038060	Bbov
Bdiv_012510	9.35775e-55	1.12029	0.221	0.051	2.13169e-51	G	Bdiv-012510	Bbov
Bdiv_014030	1.14748e-54	1.20618	0.141	0.014	2.61397e-51	G	Bdiv-014030	Bbov
Bdiv_034550	1.37872e-54	1.16002	0.152	0.018	3.14073e-51	G	Bdiv-034550	Bbov
Bdiv_013240	1.53967e-54	1.04568	0.313	0.103	3.50737e-51	G	Bdiv-013240	Bbov
Bdiv_012550c	1.57774e-54	1.0993	0.253	0.068	3.59409e-51	G	Bdiv-012550c	Bbov
Bdiv_033600	2.30946e-53	1.12868	0.132	0.011	5.26096e-50	G	Bdiv-033600	Bbov
Bdiv_036500c	2.90745e-53	1.21405	0.146	0.018	6.62318e-50	G	Bdiv-036500c	Bbov
Bdiv_028460	4.76309e-53	1.12358	0.245	0.066	1.08503e-49	G	Bdiv-028460	Bbov
Bdiv_038630	2.8981e-52	1.01727	0.336	0.125	6.60187e-49	G	Bdiv-038630	Bbov
Bdiv_024280c	3.01539e-52	1.14453	0.2	0.043	6.86906e-49	G	Bdiv-024280c	Bbov
Bdiv_005700c	1.67529e-51	1.11265	0.26	0.078	3.81631e-48	G	Bdiv-005700c	Bbov
Bdiv_018860	2.07507e-51	1.06165	0.171	0.028	4.727e-48	G	Bdiv-018860	Bbov
Bdiv_009650	2.61869e-51	1.09852	0.208	0.047	5.96537e-48	G	Bdiv-009650	Bbov
Bdiv_024200c	1.9839e-50	1.21627	0.205	0.047	4.51933e-47	G	Bdiv-024200c	Bbov
Bdiv_027180	7.57873e-50	1.08347	0.163	0.027	1.72643e-46	G	Bdiv-027180	Bbov
Bdiv_038460	1.20854e-49	1.03394	0.287	0.095	2.75305e-46	G	Bdiv-038460	Bbov
Bdiv_003060	3.87684e-49	1.04308	0.148	0.021	8.83143e-46	G	Bdiv-003060	Bbov
Bdiv_021250c	9.41399e-49	1.04777	0.323	0.121	2.14451e-45	G	Bdiv-021250c	Bbov
Bdiv_033940	2.92063e-48	1.14435	0.211	0.054	6.65321e-45	G	Bdiv-033940	Bbov
Bdiv_010210c	2.81345e-47	1.00217	0.114	0.009	6.40903e-44	G	Bdiv-010210c	Bbov
Bdiv_018990c	4.80895e-47	1.08286	0.118	0.011	1.09548e-43	G	Bdiv-018990c	Bbov
Bdiv_035130	9.57664e-47	1.17429	0.211	0.056	2.18156e-43	G	Bdiv-035130	Bbov
Bdiv_018850c	7.51518e-46	1.08067	0.27	0.094	1.71196e-42	G	Bdiv-018850c	Bbov
Bdiv_005940c	3.59406e-45	1.10541	0.15	0.026	8.18727e-42	G	Bdiv-005940c	Bbov
Bdiv_005130c	4.05981e-45	1.05956	0.209	0.055	9.24826e-42	G	Bdiv-005130c	Bbov
Bdiv_002750	4.86811e-45	1.14396	0.136	0.019	1.10896e-41	G	Bdiv-002750	Bbov
Bdiv_027200	2.31136e-44	1.02278	0.342	0.145	5.26529e-41	G	Bdiv-027200	Bbov
Bdiv_024080	5.04497e-44	1.09115	0.136	0.021	1.14925e-40	G	Bdiv-024080	Bbov
Bdiv_029200c	2.19665e-43	1.03823	0.188	0.046	5.00398e-40	G	Bdiv-029200c	Bbov
Bdiv_027360	5.3432e-43	1.02426	0.114	0.012	1.21718e-39	G	Bdiv-027360	Bbov
Bdiv_036890c	7.62071e-43	1.08028	0.166	0.036	1.736e-39	G	Bdiv-036890c	Bbov
Bdiv_005870	1.47916e-42	1.04165	0.144	0.025	3.36953e-39	G	Bdiv-005870	Bbov
Bdiv_034100	8.73364e-42	1.04828	0.172	0.04	1.98952e-38	G	Bdiv-034100	Bbov
Bdiv_029410c	1.08505e-41	1.02219	0.18	0.045	2.47175e-38	G	Bdiv-029410c	Bbov
Bdiv_006080	4.94358e-41	1.00381	0.172	0.041	1.12615e-37	G	Bdiv-006080	Bbov
Bdiv_019130	8.55352e-40	1.06389	0.165	0.039	1.94849e-36	G	Bdiv-019130	Bbov
Bdiv_032440	6.75604e-39	1.02231	0.141	0.028	1.53903e-35	G	Bdiv-032440	Bbov
Bdiv_033680c	1.55859e-37	1.0131	0.12	0.019	3.55046e-34	G	Bdiv-033680c	Bbov
Bdiv_034870c	1.7685e-37	1.01723	0.146	0.031	4.02863e-34	G	Bdiv-034870c	Bbov
Bdiv_030080	1.37695e-36	1.02468	0.154	0.036	3.1367e-33	G	Bdiv-030080	Bbov
Bdiv_029130	7.38677e-36	1.01227	0.138	0.029	1.68271e-32	G	Bdiv-029130	Bbov
Bdiv_013360c	1.12971e-34	1.01568	0.186	0.057	2.57348e-31	G	Bdiv-013360c	Bbov
Bdiv_002550c	7.18181e-33	1.00762	0.122	0.025	1.63602e-29	G	Bdiv-002550c	Bbov

## Sheet: Bdiv_Cow cell cycle markers
GeneID	p_val	avg_log2FC	pct.1	pct.2	p_val_adj	cluster	gene	spp
Bdiv_000760c	0	2.98905	0.829	0.132	0	SM	Bdiv-000760c	Bdiv_cow
Bdiv_030660	0	2.81399	0.771	0.14	0	SM	Bdiv-030660	Bdiv_cow
Bdiv_022340	0	2.52811	0.871	0.218	0	SM	Bdiv-022340	Bdiv_cow
Bdiv_016310c	0	2.46818	0.976	0.427	0	SM	Bdiv-016310c	Bdiv_cow
Bdiv_034020c	0	2.45951	0.925	0.327	0	SM	Bdiv-034020c	Bdiv_cow
Bdiv_039980c	0	2.41329	0.969	0.317	0	SM	Bdiv-039980c	Bdiv_cow
Bdiv_017140	0	2.32799	0.758	0.167	0	SM	Bdiv-017140	Bdiv_cow
Bdiv_019540c	0	2.30964	0.89	0.38	0	SM	Bdiv-019540c	Bdiv_cow
Bdiv_010140c	0	2.27921	0.95	0.379	0	SM	Bdiv-010140c	Bdiv_cow
Bdiv_032630c	0	2.27239	0.974	0.334	0	SM	Bdiv-032630c	Bdiv_cow
Bdiv_020490	0	2.22583	0.928	0.322	0	SM	Bdiv-020490	Bdiv_cow
Bdiv_024370c	0	2.10261	0.845	0.228	0	SM	Bdiv-024370c	Bdiv_cow
Bdiv_023730	0	2.08446	0.944	0.344	0	SM	Bdiv-023730	Bdiv_cow
Bdiv_005010c	0	1.96299	0.985	0.532	0	SM	Bdiv-005010c	Bdiv_cow
Bdiv_012980	0	1.82015	0.961	0.415	0	SM	Bdiv-012980	Bdiv_cow
Bdiv_004410c	0	1.50913	0.997	0.863	0	SM	Bdiv-004410c	Bdiv_cow
Bdiv_015820c	2.73044e-300	2.32985	0.684	0.114	6.16534e-297	SM	Bdiv-015820c	Bdiv_cow
Bdiv_038490	5.85279e-296	2.24338	0.758	0.187	1.32156e-292	SM	Bdiv-038490	Bdiv_cow
Bdiv_039100	6.88827e-282	1.88102	0.875	0.396	1.55537e-278	SM	Bdiv-039100	Bdiv_cow
Bdiv_016930	9.99439e-277	1.98977	0.795	0.251	2.25673e-273	SM	Bdiv-016930	Bdiv_cow
Bdiv_014590c	2.07079e-274	1.5313	0.961	0.587	4.67585e-271	SM	Bdiv-014590c	Bdiv_cow
Bdiv_005460c	2.40832e-255	1.4868	0.965	0.696	5.43799e-252	SM	Bdiv-005460c	Bdiv_cow
Bdiv_021450	1.31071e-254	1.48889	0.937	0.621	2.95957e-251	SM	Bdiv-021450	Bdiv_cow
Bdiv_027330	1.81373e-253	2.40791	0.554	0.078	4.09541e-250	SM	Bdiv-027330	Bdiv_cow
Bdiv_004640c	5.01179e-253	2.34757	0.624	0.127	1.13166e-249	SM	Bdiv-004640c	Bdiv_cow
Bdiv_001620c	3.11062e-245	2.10307	0.663	0.154	7.02377e-242	SM	Bdiv-001620c	Bdiv_cow
Bdiv_033720	4.82562e-242	1.5188	0.929	0.532	1.08962e-238	SM	Bdiv-033720	Bdiv_cow
Bdiv_037780	3.39504e-241	1.79395	0.824	0.308	7.66599e-238	SM	Bdiv-037780	Bdiv_cow
Bdiv_009450	2.36274e-231	2.20361	0.559	0.094	5.33506e-228	SM	Bdiv-009450	Bdiv_cow
Bdiv_013610	3.03376e-231	2.28891	0.643	0.175	6.85022e-228	SM	Bdiv-013610	Bdiv_cow
Bdiv_031650c	6.37203e-230	2.12217	0.631	0.147	1.43881e-226	SM	Bdiv-031650c	Bdiv_cow
Bdiv_022900	5.30701e-226	2.12174	0.589	0.117	1.19832e-222	SM	Bdiv-022900	Bdiv_cow
Bdiv_027570c	5.33267e-216	1.99947	0.681	0.202	1.20412e-212	SM	Bdiv-027570c	Bdiv_cow
Bdiv_016990c	5.44991e-216	1.93335	0.635	0.156	1.23059e-212	SM	Bdiv-016990c	Bdiv_cow
Bdiv_015990c	2.77266e-214	2.2334	0.485	0.067	6.26068e-211	SM	Bdiv-015990c	Bdiv_cow
Bdiv_005110	7.10857e-212	2.22657	0.476	0.061	1.60512e-208	SM	Bdiv-005110	Bdiv_cow
Bdiv_038320	1.74388e-210	1.59069	0.846	0.405	3.93768e-207	SM	Bdiv-038320	Bdiv_cow
Bdiv_024900c	7.23861e-204	2.47417	0.338	0.011	1.63448e-200	SM	Bdiv-024900c	Bdiv_cow
Bdiv_016250	2.02074e-198	1.87072	0.662	0.215	4.56283e-195	SM	Bdiv-016250	Bdiv_cow
Bdiv_000370c	6.24685e-185	2.36664	0.464	0.076	1.41054e-181	SM	Bdiv-000370c	Bdiv_cow
Bdiv_032340c	2.59058e-182	2.42669	0.339	0.022	5.84953e-179	SM	Bdiv-032340c	Bdiv_cow
Bdiv_019030	3.49663e-182	1.75923	0.72	0.299	7.8954e-179	SM	Bdiv-019030	Bdiv_cow
Bdiv_031070	6.71309e-182	2.1264	0.398	0.045	1.51582e-178	SM	Bdiv-031070	Bdiv_cow
Bdiv_013030c	4.21779e-177	1.96646	0.506	0.108	9.52377e-174	SM	Bdiv-013030c	Bdiv_cow
Bdiv_030430c	3.51835e-175	1.73539	0.63	0.196	7.94444e-172	SM	Bdiv-030430c	Bdiv_cow
Bdiv_026840c	3.64827e-172	2.51635	0.347	0.031	8.2378e-169	SM	Bdiv-026840c	Bdiv_cow
Bdiv_020020c	7.25839e-172	1.76607	0.658	0.245	1.63895e-168	SM	Bdiv-020020c	Bdiv_cow
Bdiv_034720	1.22133e-171	1.84019	0.525	0.125	2.75777e-168	SM	Bdiv-034720	Bdiv_cow
Bdiv_009640c	1.96984e-164	1.11706	0.935	0.675	4.4479e-161	SM	Bdiv-009640c	Bdiv_cow
Bdiv_035340c	6.68123e-160	1.89739	0.425	0.075	1.50862e-156	SM	Bdiv-035340c	Bdiv_cow
Bdiv_005000c	6.27859e-159	1.70198	0.593	0.186	1.41771e-155	SM	Bdiv-005000c	Bdiv_cow
Bdiv_025310	1.78264e-158	2.00266	0.432	0.075	4.02519e-155	SM	Bdiv-025310	Bdiv_cow
Bdiv_011450c	1.71512e-157	1.17364	0.84	0.472	3.87273e-154	SM	Bdiv-011450c	Bdiv_cow
Bdiv_037960	5.41693e-157	1.77185	0.556	0.152	1.22314e-153	SM	Bdiv-037960	Bdiv_cow
Bdiv_004320	1.0929e-156	1.07146	0.917	0.587	2.46778e-153	SM	Bdiv-004320	Bdiv_cow
Bdiv_016060	8.92425e-154	1.82961	0.432	0.077	2.0151e-150	SM	Bdiv-016060	Bdiv_cow
Bdiv_019630	1.31116e-152	1.88037	0.442	0.089	2.9606e-149	SM	Bdiv-019630	Bdiv_cow
Bdiv_027890	1.89558e-149	1.22837	0.83	0.481	4.28023e-146	SM	Bdiv-027890	Bdiv_cow
Bdiv_013740c	3.60208e-147	1.98453	0.295	0.023	8.13349e-144	SM	Bdiv-013740c	Bdiv_cow
Bdiv_028580c	5.22714e-147	2.23232	0.292	0.023	1.18029e-143	SM	Bdiv-028580c	Bdiv_cow
Bdiv_030420c	1.01499e-146	1.63808	0.52	0.14	2.29185e-143	SM	Bdiv-030420c	Bdiv_cow
Bdiv_006100	1.30751e-144	1.10236	0.837	0.409	2.95235e-141	SM	Bdiv-006100	Bdiv_cow
Bdiv_035650	2.51495e-142	1.90163	0.302	0.028	5.67876e-139	SM	Bdiv-035650	Bdiv_cow
Bdiv_019910	1.50406e-139	1.49302	0.664	0.286	3.39617e-136	SM	Bdiv-019910	Bdiv_cow
Bdiv_009410	2.20638e-139	2.05723	0.306	0.033	4.98201e-136	SM	Bdiv-009410	Bdiv_cow
Bdiv_032780	1.66275e-138	1.77642	0.433	0.098	3.75448e-135	SM	Bdiv-032780	Bdiv_cow
Bdiv_040360	1.79561e-138	1.66676	0.514	0.14	4.05448e-135	SM	Bdiv-040360	Bdiv_cow
Bdiv_005150	2.48006e-136	1.90022	0.383	0.073	5.59998e-133	SM	Bdiv-005150	Bdiv_cow
Bdiv_011320	6.38122e-136	1.24558	0.768	0.42	1.44088e-132	SM	Bdiv-011320	Bdiv_cow
Bdiv_029480c	4.20518e-135	1.67843	0.441	0.102	9.49531e-132	SM	Bdiv-029480c	Bdiv_cow
Bdiv_039530	1.5739e-134	1.43701	0.651	0.281	3.55387e-131	SM	Bdiv-039530	Bdiv_cow
Bdiv_017670c	4.49186e-134	1.47839	0.64	0.263	1.01426e-130	SM	Bdiv-017670c	Bdiv_cow
Bdiv_037760	8.5971e-134	1.56851	0.482	0.128	1.94123e-130	SM	Bdiv-037760	Bdiv_cow
Bdiv_003130c	1.29647e-131	1.88375	0.273	0.023	2.92744e-128	SM	Bdiv-003130c	Bdiv_cow
Bdiv_000810	3.08776e-131	1.67305	0.481	0.128	6.97216e-128	SM	Bdiv-000810	Bdiv_cow
Bdiv_025230	6.12681e-131	1.59752	0.535	0.182	1.38343e-127	SM	Bdiv-025230	Bdiv_cow
Bdiv_003890	2.19689e-129	1.3454	0.665	0.3	4.96058e-126	SM	Bdiv-003890	Bdiv_cow
Bdiv_017390	3.68119e-129	1.64636	0.519	0.171	8.31213e-126	SM	Bdiv-017390	Bdiv_cow
Bdiv_006110	4.27835e-129	1.16769	0.803	0.474	9.66051e-126	SM	Bdiv-006110	Bdiv_cow
Bdiv_018110c	5.48458e-126	1.8249	0.35	0.063	1.23842e-122	SM	Bdiv-018110c	Bdiv_cow
Bdiv_002670	5.89828e-125	1.57581	0.49	0.152	1.33183e-121	SM	Bdiv-002670	Bdiv_cow
Bdiv_016330	1.67806e-123	1.80109	0.301	0.039	3.78906e-120	SM	Bdiv-016330	Bdiv_cow
Bdiv_001720c	5.25383e-122	1.36376	0.614	0.252	1.18631e-118	SM	Bdiv-001720c	Bdiv_cow
Bdiv_024360	3.28049e-115	1.53508	0.494	0.167	7.40734e-112	SM	Bdiv-024360	Bdiv_cow
Bdiv_040430c	8.20279e-115	1.3344	0.613	0.27	1.85219e-111	SM	Bdiv-040430c	Bdiv_cow
Bdiv_022660c	5.70567e-114	1.30009	0.646	0.315	1.28834e-110	SM	Bdiv-022660c	Bdiv_cow
Bdiv_004760c	9.2256e-114	1.70514	0.346	0.07	2.08314e-110	SM	Bdiv-004760c	Bdiv_cow
Bdiv_014780	1.5918e-113	1.55837	0.365	0.079	3.59429e-110	SM	Bdiv-014780	Bdiv_cow
Bdiv_039600	2.15102e-110	1.63678	0.25	0.026	4.857e-107	SM	Bdiv-039600	Bdiv_cow
Bdiv_028100	2.42082e-110	1.43071	0.407	0.1	5.46621e-107	SM	Bdiv-028100	Bdiv_cow
Bdiv_004730	8.96721e-110	1.5193	0.412	0.111	2.0248e-106	SM	Bdiv-004730	Bdiv_cow
Bdiv_036290	1.17652e-109	1.31429	0.589	0.248	2.65659e-106	SM	Bdiv-036290	Bdiv_cow
Bdiv_013990	1.21274e-109	1.54866	0.518	0.191	2.73836e-106	SM	Bdiv-013990	Bdiv_cow
Bdiv_011490	5.48544e-109	1.69813	0.301	0.051	1.23861e-105	SM	Bdiv-011490	Bdiv_cow
Bdiv_039610c	5.43528e-107	1.63544	0.265	0.034	1.22729e-103	SM	Bdiv-039610c	Bdiv_cow
Bdiv_039780c	1.59977e-105	1.30963	0.682	0.395	3.61227e-102	SM	Bdiv-039780c	Bdiv_cow
Bdiv_025210	7.69791e-104	1.48272	0.444	0.141	1.73819e-100	SM	Bdiv-025210	Bdiv_cow
Bdiv_014150	1.44743e-102	1.60561	0.303	0.055	3.26829e-99	SM	Bdiv-014150	Bdiv_cow
Bdiv_015030	4.97756e-100	1.61285	0.294	0.053	1.12393e-96	SM	Bdiv-015030	Bdiv_cow
Bdiv_017040	5.80872e-100	1.48707	0.43	0.139	1.31161e-96	SM	Bdiv-017040	Bdiv_cow
Bdiv_010620	4.54139e-99	1.85656	0.318	0.071	1.02545e-95	SM	Bdiv-010620	Bdiv_cow
Bdiv_028050c	5.35817e-99	1.57622	0.238	0.028	1.20987e-95	SM	Bdiv-028050c	Bdiv_cow
Bdiv_033660	5.56325e-99	1.44593	0.433	0.141	1.25618e-95	SM	Bdiv-033660	Bdiv_cow
Bdiv_011270c	8.15536e-97	1.47576	0.313	0.064	1.84148e-93	SM	Bdiv-011270c	Bdiv_cow
Bdiv_010660	1.24886e-96	1.61878	0.242	0.032	2.81993e-93	SM	Bdiv-010660	Bdiv_cow
Bdiv_039890c	6.46568e-96	1.35418	0.47	0.17	1.45995e-92	SM	Bdiv-039890c	Bdiv_cow
Bdiv_016010	8.00617e-96	1.56611	0.289	0.055	1.80779e-92	SM	Bdiv-016010	Bdiv_cow
Bdiv_017880	2.61742e-92	1.45105	0.405	0.127	5.91014e-89	SM	Bdiv-017880	Bdiv_cow
Bdiv_023260c	2.76211e-92	1.55417	0.253	0.039	6.23684e-89	SM	Bdiv-023260c	Bdiv_cow
Bdiv_033440	2.37241e-91	1.55005	0.228	0.029	5.35689e-88	SM	Bdiv-033440	Bdiv_cow
Bdiv_037140	3.73043e-91	1.36839	0.436	0.149	8.42332e-88	SM	Bdiv-037140	Bdiv_cow
Bdiv_005270	6.67953e-90	1.40594	0.399	0.126	1.50824e-86	SM	Bdiv-005270	Bdiv_cow
Bdiv_018140c	3.52058e-88	1.34613	0.353	0.096	7.94947e-85	SM	Bdiv-018140c	Bdiv_cow
Bdiv_004650	9.22772e-88	1.34837	0.425	0.146	2.08362e-84	SM	Bdiv-004650	Bdiv_cow
Bdiv_005930c	1.40087e-87	1.54594	0.253	0.044	3.16317e-84	SM	Bdiv-005930c	Bdiv_cow
Bdiv_007750c	1.57121e-87	1.26739	0.557	0.267	3.5478e-84	SM	Bdiv-007750c	Bdiv_cow
Bdiv_039470	4.21989e-87	1.49439	0.192	0.018	9.52852e-84	SM	Bdiv-039470	Bdiv_cow
Bdiv_020650	6.89754e-87	1.46986	0.33	0.086	1.55746e-83	SM	Bdiv-020650	Bdiv_cow
Bdiv_035920	8.19959e-87	1.49219	0.211	0.025	1.85147e-83	SM	Bdiv-035920	Bdiv_cow
Bdiv_000940c	5.02613e-86	1.6254	0.344	0.095	1.1349e-82	SM	Bdiv-000940c	Bdiv_cow
Bdiv_036410	3.36842e-85	1.29864	0.437	0.157	7.6059e-82	SM	Bdiv-036410	Bdiv_cow
Bdiv_016660c	7.34526e-84	1.36593	0.346	0.098	1.65856e-80	SM	Bdiv-016660c	Bdiv_cow
Bdiv_033020	3.01274e-83	1.4042	0.257	0.049	6.80277e-80	SM	Bdiv-033020	Bdiv_cow
Bdiv_037820	5.14697e-82	1.33427	0.277	0.059	1.16219e-78	SM	Bdiv-037820	Bdiv_cow
Bdiv_021000c	4.87111e-81	1.49183	0.242	0.044	1.0999e-77	SM	Bdiv-021000c	Bdiv_cow
Bdiv_023160	1.06086e-77	1.43713	0.176	0.018	2.39542e-74	SM	Bdiv-023160	Bdiv_cow
Bdiv_036720c	2.16068e-77	1.37312	0.324	0.092	4.87881e-74	SM	Bdiv-036720c	Bdiv_cow
Bdiv_009020c	2.38521e-77	1.26202	0.341	0.101	5.38581e-74	SM	Bdiv-009020c	Bdiv_cow
Bdiv_035230	2.40091e-77	1.40057	0.166	0.014	5.42125e-74	SM	Bdiv-035230	Bdiv_cow
Bdiv_009300c	3.5687e-77	1.30848	0.254	0.051	8.05812e-74	SM	Bdiv-009300c	Bdiv_cow
Bdiv_003170c	4.16582e-77	1.03395	0.679	0.406	9.40641e-74	SM	Bdiv-003170c	Bdiv_cow
Bdiv_037690c	9.59796e-77	1.27709	0.402	0.147	2.16722e-73	SM	Bdiv-037690c	Bdiv_cow
Bdiv_028700	6.80111e-76	1.32091	0.289	0.071	1.53569e-72	SM	Bdiv-028700	Bdiv_cow
Bdiv_030820c	1.82524e-75	1.31137	0.281	0.069	4.1214e-72	SM	Bdiv-030820c	Bdiv_cow
Bdiv_010170c	2.11087e-75	1.47915	0.223	0.038	4.76635e-72	SM	Bdiv-010170c	Bdiv_cow
Bdiv_006420	1.10612e-73	1.40864	0.243	0.051	2.49763e-70	SM	Bdiv-006420	Bdiv_cow
Bdiv_018820c	5.49527e-72	1.34505	0.238	0.049	1.24083e-68	SM	Bdiv-018820c	Bdiv_cow
Bdiv_011580c	9.69551e-72	1.30667	0.232	0.047	2.18925e-68	SM	Bdiv-011580c	Bdiv_cow
Bdiv_002330	1.45469e-71	1.22742	0.418	0.163	3.28468e-68	SM	Bdiv-002330	Bdiv_cow
Bdiv_000820	1.60066e-71	1.16951	0.378	0.132	3.61429e-68	SM	Bdiv-000820	Bdiv_cow
Bdiv_000390c	5.94387e-71	1.33994	0.308	0.09	1.34213e-67	SM	Bdiv-000390c	Bdiv_cow
Bdiv_009740	8.79319e-71	1.34153	0.265	0.065	1.9855e-67	SM	Bdiv-009740	Bdiv_cow
Bdiv_031060c	1.31255e-70	1.24374	0.334	0.106	2.96374e-67	SM	Bdiv-031060c	Bdiv_cow
Bdiv_003940	1.5189e-70	1.3194	0.309	0.092	3.42968e-67	SM	Bdiv-003940	Bdiv_cow
Bdiv_037970c	6.37559e-69	1.0687	0.435	0.178	1.43961e-65	SM	Bdiv-037970c	Bdiv_cow
Bdiv_010800c	7.08432e-69	1.33927	0.257	0.063	1.59964e-65	SM	Bdiv-010800c	Bdiv_cow
Bdiv_022910c	7.17037e-69	1.23663	0.288	0.079	1.61907e-65	SM	Bdiv-022910c	Bdiv_cow
Bdiv_015260c	6.5891e-68	1.23295	0.255	0.06	1.48782e-64	SM	Bdiv-015260c	Bdiv_cow
Bdiv_026900	6.81603e-68	1.29825	0.229	0.048	1.53906e-64	SM	Bdiv-026900	Bdiv_cow
Bdiv_039580c	4.85334e-66	1.2688	0.168	0.022	1.09588e-62	SM	Bdiv-039580c	Bdiv_cow
Bdiv_040080	5.08698e-66	1.04405	0.492	0.233	1.14864e-62	SM	Bdiv-040080	Bdiv_cow
Bdiv_000800c	9.59305e-65	1.14366	0.47	0.223	2.16611e-61	SM	Bdiv-000800c	Bdiv_cow
Bdiv_035130	4.65149e-63	1.19502	0.249	0.063	1.05031e-59	SM	Bdiv-035130	Bdiv_cow
Bdiv_002920	9.1127e-63	1.04793	0.468	0.219	2.05765e-59	SM	Bdiv-002920	Bdiv_cow
Bdiv_024970c	4.28708e-61	1.3198	0.2	0.041	9.68024e-58	SM	Bdiv-024970c	Bdiv_cow
Bdiv_015890	1.61487e-60	1.22931	0.198	0.039	3.64637e-57	SM	Bdiv-015890	Bdiv_cow
Bdiv_035860	3.44515e-60	1.05329	0.489	0.247	7.77914e-57	SM	Bdiv-035860	Bdiv_cow
Bdiv_030710c	2.1709e-59	1.27324	0.18	0.033	4.9019e-56	SM	Bdiv-030710c	Bdiv_cow
Bdiv_008910	3.7684e-59	1.25824	0.171	0.028	8.50906e-56	SM	Bdiv-008910	Bdiv_cow
Bdiv_014630	3.88628e-59	1.26478	0.34	0.13	8.77523e-56	SM	Bdiv-014630	Bdiv_cow
Bdiv_031830	5.04717e-59	1.28506	0.26	0.076	1.13965e-55	SM	Bdiv-031830	Bdiv_cow
Bdiv_007630	5.43073e-59	1.3029	0.207	0.046	1.22626e-55	SM	Bdiv-007630	Bdiv_cow
Bdiv_009820c	7.38856e-59	1.17421	0.317	0.113	1.66834e-55	SM	Bdiv-009820c	Bdiv_cow
Bdiv_024680	5.52352e-58	1.22421	0.19	0.038	1.24721e-54	SM	Bdiv-024680	Bdiv_cow
Bdiv_022420c	5.97618e-58	1.09148	0.126	0.011	1.34942e-54	SM	Bdiv-022420c	Bdiv_cow
Bdiv_023560c	1.1127e-57	1.20026	0.163	0.026	2.51248e-54	SM	Bdiv-023560c	Bdiv_cow
Bdiv_030950c	1.15991e-57	1.17423	0.285	0.092	2.61907e-54	SM	Bdiv-030950c	Bdiv_cow
Bdiv_038660	2.3198e-57	1.12991	0.284	0.089	5.2381e-54	SM	Bdiv-038660	Bdiv_cow
Bdiv_013430c	3.3057e-57	1.27834	0.205	0.047	7.46427e-54	SM	Bdiv-013430c	Bdiv_cow
Bdiv_031750	3.49326e-57	1.16172	0.383	0.162	7.88777e-54	SM	Bdiv-031750	Bdiv_cow
Bdiv_016950c	4.07968e-57	1.19065	0.253	0.073	9.21191e-54	SM	Bdiv-016950c	Bdiv_cow
Bdiv_015780c	3.6419e-56	1.73124	0.463	0.272	8.22342e-53	SM	Bdiv-015780c	Bdiv_cow
Bdiv_003610c	3.78308e-56	1.02882	0.454	0.22	8.54218e-53	SM	Bdiv-003610c	Bdiv_cow
Bdiv_015020c	3.86526e-56	1.17697	0.167	0.028	8.72775e-53	SM	Bdiv-015020c	Bdiv_cow
Bdiv_004240	4.82587e-56	1.23897	0.241	0.067	1.08968e-52	SM	Bdiv-004240	Bdiv_cow
Bdiv_005340	1.65735e-55	1.16622	0.265	0.082	3.74229e-52	SM	Bdiv-005340	Bdiv_cow
Bdiv_023430c	2.05291e-55	1.19401	0.236	0.064	4.63546e-52	SM	Bdiv-023430c	Bdiv_cow
Bdiv_022680	2.76839e-55	1.06629	0.366	0.15	6.25102e-52	SM	Bdiv-022680	Bdiv_cow
Bdiv_021830	6.44161e-55	1.19502	0.241	0.069	1.45452e-51	SM	Bdiv-021830	Bdiv_cow
Bdiv_011800	1.23598e-54	1.18088	0.186	0.038	2.79084e-51	SM	Bdiv-011800	Bdiv_cow
Bdiv_023290c	3.26559e-54	1.13009	0.251	0.074	7.37371e-51	SM	Bdiv-023290c	Bdiv_cow
Bdiv_008700c	4.57281e-54	1.28369	0.22	0.059	1.03254e-50	SM	Bdiv-008700c	Bdiv_cow
Bdiv_017300	4.62847e-54	1.15643	0.296	0.105	1.04511e-50	SM	Bdiv-017300	Bdiv_cow
Bdiv_010020c	1.13569e-53	1.12007	0.237	0.066	2.56439e-50	SM	Bdiv-010020c	Bdiv_cow
Bdiv_016150	3.47769e-52	1.13311	0.136	0.018	7.85262e-49	SM	Bdiv-016150	Bdiv_cow
Bdiv_010970	3.03399e-51	1.03809	0.142	0.021	6.85074e-48	SM	Bdiv-010970	Bdiv_cow
Bdiv_018010c	5.76782e-50	1.25676	0.228	0.067	1.30237e-46	SM	Bdiv-018010c	Bdiv_cow
Bdiv_011090c	1.06347e-49	1.03703	0.353	0.153	2.40133e-46	SM	Bdiv-011090c	Bdiv_cow
Bdiv_026980	1.11719e-49	1.13801	0.178	0.04	2.52261e-46	SM	Bdiv-026980	Bdiv_cow
Bdiv_004990	1.61984e-48	1.06733	0.205	0.054	3.65759e-45	SM	Bdiv-004990	Bdiv_cow
Bdiv_025390	9.11383e-48	1.02505	0.348	0.153	2.0579e-44	SM	Bdiv-025390	Bdiv_cow
Bdiv_034910c	1.31526e-47	1.00103	0.224	0.065	2.96986e-44	SM	Bdiv-034910c	Bdiv_cow
Bdiv_027380	2.0477e-47	1.0649	0.266	0.093	4.62371e-44	SM	Bdiv-027380	Bdiv_cow
Bdiv_007790	6.94362e-47	1.2357	0.324	0.141	1.56787e-43	SM	Bdiv-007790	Bdiv_cow
Bdiv_019430	1.45727e-46	1.11961	0.145	0.026	3.29052e-43	SM	Bdiv-019430	Bdiv_cow
Bdiv_001880c	3.16444e-46	1.12007	0.208	0.059	7.14531e-43	SM	Bdiv-001880c	Bdiv_cow
Bdiv_010130	7.58754e-46	1.13625	0.172	0.041	1.71327e-42	SM	Bdiv-010130	Bdiv_cow
Bdiv_014890c	7.81385e-46	1.087	0.171	0.04	1.76437e-42	SM	Bdiv-014890c	Bdiv_cow
Bdiv_016020	1.31184e-45	1.04877	0.289	0.112	2.96213e-42	SM	Bdiv-016020	Bdiv_cow
Bdiv_037330	4.50723e-44	1.10058	0.163	0.038	1.01773e-40	SM	Bdiv-037330	Bdiv_cow
Bdiv_040280	9.62465e-44	1.14189	0.203	0.06	2.17325e-40	SM	Bdiv-040280	Bdiv_cow
Bdiv_034990	1.20042e-43	1.05235	0.209	0.064	2.71056e-40	SM	Bdiv-034990	Bdiv_cow
Bdiv_006220	8.90765e-43	1.08049	0.246	0.088	2.01135e-39	SM	Bdiv-006220	Bdiv_cow
Bdiv_023540	1.09294e-42	1.03268	0.121	0.019	2.46785e-39	SM	Bdiv-023540	Bdiv_cow
Bdiv_040500	1.48394e-42	1.04206	0.324	0.144	3.35075e-39	SM	Bdiv-040500	Bdiv_cow
Bdiv_002620	1.75421e-42	1.0321	0.146	0.03	3.96101e-39	SM	Bdiv-002620	Bdiv_cow
Bdiv_037510c	4.13918e-42	1.0419	0.175	0.046	9.34627e-39	SM	Bdiv-037510c	Bdiv_cow
Bdiv_029690c	1.62082e-40	1.0846	0.179	0.05	3.65982e-37	SM	Bdiv-029690c	Bdiv_cow
Bdiv_003290	4.80144e-40	1.02823	0.203	0.064	1.08416e-36	SM	Bdiv-003290	Bdiv_cow
Bdiv_024550	6.60598e-40	1.03248	0.247	0.093	1.49163e-36	SM	Bdiv-024550	Bdiv_cow
Bdiv_038990c	2.30315e-38	1.05452	0.207	0.07	5.2005e-35	SM	Bdiv-038990c	Bdiv_cow
Bdiv_020310	1.02779e-36	1.06137	0.378	0.207	2.32076e-33	SM	Bdiv-020310	Bdiv_cow
Bdiv_014830c	7.88761e-31	1.06806	0.167	0.056	1.78102e-27	SM	Bdiv-014830c	Bdiv_cow
Bdiv_028030	0	5.3835	0.779	0.044	0	C	Bdiv-028030	Bdiv_cow
Bdiv_013580c	0	3.9856	0.979	0.244	0	C	Bdiv-013580c	Bdiv_cow
Bdiv_023990c	0	3.86325	0.884	0.078	0	C	Bdiv-023990c	Bdiv_cow
Bdiv_010240c	0	3.6485	0.748	0.044	0	C	Bdiv-010240c	Bdiv_cow
Bdiv_009180	0	3.58053	0.999	0.341	0	C	Bdiv-009180	Bdiv_cow
Bdiv_003910c	0	3.30035	0.957	0.446	0	C	Bdiv-003910c	Bdiv_cow
Bdiv_003870c	0	3.23181	0.832	0.13	0	C	Bdiv-003870c	Bdiv_cow
Bdiv_006490c	0	3.21945	0.785	0.11	0	C	Bdiv-006490c	Bdiv_cow
Bdiv_033990c	0	2.99828	0.832	0.155	0	C	Bdiv-033990c	Bdiv_cow
Bdiv_009230c	0	2.92377	0.991	0.629	0	C	Bdiv-009230c	Bdiv_cow
Bdiv_034350c	0	2.90305	0.806	0.158	0	C	Bdiv-034350c	Bdiv_cow
Bdiv_028330	0	2.81587	0.981	0.34	0	C	Bdiv-028330	Bdiv_cow
Bdiv_021160	0	1.83738	0.997	0.866	0	C	Bdiv-021160	Bdiv_cow
Bdiv_007890	8.76384e-306	1.86585	1	0.913	1.97888e-302	C	Bdiv-007890	Bdiv_cow
Bdiv_039280c	2.92573e-305	2.51809	0.936	0.33	6.6063e-302	C	Bdiv-039280c	Bdiv_cow
Bdiv_032880	7.16525e-281	2.704	0.653	0.091	1.61791e-277	C	Bdiv-032880	Bdiv_cow
Bdiv_013880c	1.45814e-273	3.24656	0.427	0.015	3.29249e-270	C	Bdiv-013880c	Bdiv_cow
Bdiv_037320c	1.47754e-247	3.1721	0.447	0.029	3.33629e-244	C	Bdiv-037320c	Bdiv_cow
Bdiv_040540	3.20084e-240	2.76135	0.665	0.13	7.2275e-237	C	Bdiv-040540	Bdiv_cow
Bdiv_038310	1.99142e-230	1.74903	0.978	0.682	4.49663e-227	C	Bdiv-038310	Bdiv_cow
Bdiv_004890c	3.22734e-208	1.37144	0.993	0.875	7.28734e-205	C	Bdiv-004890c	Bdiv_cow
Bdiv_027870	1.39601e-205	2.53849	0.622	0.129	3.15218e-202	C	Bdiv-027870	Bdiv_cow
Bdiv_001770c	4.90465e-204	1.99392	0.902	0.449	1.10747e-200	C	Bdiv-001770c	Bdiv_cow
Bdiv_000690c	2.88105e-179	2.35338	0.588	0.133	6.50542e-176	C	Bdiv-000690c	Bdiv_cow
Bdiv_035640	6.55895e-179	1.70814	0.895	0.493	1.48101e-175	C	Bdiv-035640	Bdiv_cow
Bdiv_002420	1.85955e-170	1.81422	0.859	0.345	4.19887e-167	C	Bdiv-002420	Bdiv_cow
Bdiv_013120c	2.36038e-168	2.20432	0.473	0.076	5.32973e-165	C	Bdiv-013120c	Bdiv_cow
Bdiv_002410c	5.67178e-166	1.10821	0.982	0.867	1.28069e-162	C	Bdiv-002410c	Bdiv_cow
Bdiv_024410	2.48188e-164	2.07547	0.665	0.205	5.6041e-161	C	Bdiv-024410	Bdiv_cow
Bdiv_025340c	1.86224e-160	2.06411	0.574	0.13	4.20494e-157	C	Bdiv-025340c	Bdiv_cow
Bdiv_036750c	2.86611e-157	2.08463	0.396	0.05	6.47168e-154	C	Bdiv-036750c	Bdiv_cow
Bdiv_004710	3.58571e-150	1.43157	0.899	0.541	8.09654e-147	C	Bdiv-004710	Bdiv_cow
Bdiv_028640	5.73377e-121	1.35521	0.911	0.613	1.29469e-117	C	Bdiv-028640	Bdiv_cow
Bdiv_005540	5.66028e-112	1.71465	0.585	0.192	1.27809e-108	C	Bdiv-005540	Bdiv_cow
Bdiv_015420c	2.36217e-105	1.75331	0.579	0.218	5.33377e-102	C	Bdiv-015420c	Bdiv_cow
Bdiv_002520c	9.71874e-99	1.48624	0.684	0.312	2.19449e-95	C	Bdiv-002520c	Bdiv_cow
Bdiv_002460	3.64205e-93	1.24367	0.804	0.486	8.22375e-90	C	Bdiv-002460	Bdiv_cow
Bdiv_032850c	1.14259e-90	1.67246	0.499	0.171	2.57997e-87	C	Bdiv-032850c	Bdiv_cow
Bdiv_028170c	1.9858e-88	1.4873	0.586	0.231	4.48394e-85	C	Bdiv-028170c	Bdiv_cow
Bdiv_004390c	2.62854e-84	1.17081	0.806	0.544	5.93524e-81	C	Bdiv-004390c	Bdiv_cow
Bdiv_005030c	5.54082e-82	1.42692	0.588	0.26	1.25112e-78	C	Bdiv-005030c	Bdiv_cow
Bdiv_022850c	6.39739e-80	1.13691	0.795	0.514	1.44453e-76	C	Bdiv-022850c	Bdiv_cow
Bdiv_032710	2.84915e-79	1.28335	0.711	0.387	6.43338e-76	C	Bdiv-032710	Bdiv_cow
Bdiv_023270	1.25204e-78	1.55862	0.55	0.237	2.8271e-75	C	Bdiv-023270	Bdiv_cow
Bdiv_035020c	3.60957e-78	1.26947	0.693	0.379	8.1504e-75	C	Bdiv-035020c	Bdiv_cow
Bdiv_037800c	5.17759e-67	1.34727	0.525	0.216	1.1691e-63	C	Bdiv-037800c	Bdiv_cow
Bdiv_001550	2.27495e-65	1.20258	0.641	0.348	5.13684e-62	C	Bdiv-001550	Bdiv_cow
Bdiv_013520c	3.6916e-63	1.23948	0.656	0.36	8.33564e-60	C	Bdiv-013520c	Bdiv_cow
Bdiv_013040c	1.94478e-62	1.0156	0.76	0.521	4.39132e-59	C	Bdiv-013040c	Bdiv_cow
Bdiv_019460c	9.98287e-62	1.14821	0.519	0.213	2.25413e-58	C	Bdiv-019460c	Bdiv_cow
Bdiv_010630	3.5031e-60	1.16263	0.602	0.318	7.91e-57	C	Bdiv-010630	Bdiv_cow
Bdiv_005370c	3.67713e-60	1.17608	0.484	0.196	8.30297e-57	C	Bdiv-005370c	Bdiv_cow
Bdiv_014870	7.74364e-58	1.33051	0.411	0.157	1.74851e-54	C	Bdiv-014870	Bdiv_cow
Bdiv_035970	2.59951e-57	1.23133	0.512	0.236	5.8697e-54	C	Bdiv-035970	Bdiv_cow
Bdiv_020210c	7.3932e-55	1.20779	0.513	0.242	1.66938e-51	C	Bdiv-020210c	Bdiv_cow
Bdiv_012610c	6.68e-54	1.2384	0.51	0.241	1.50834e-50	C	Bdiv-012610c	Bdiv_cow
Bdiv_037350c	4.01472e-51	1.15212	0.539	0.282	9.06524e-48	C	Bdiv-037350c	Bdiv_cow
Bdiv_021640	1.80071e-45	1.19295	0.513	0.274	4.06601e-42	C	Bdiv-021640	Bdiv_cow
Bdiv_031190	6.456e-44	1.28274	0.304	0.109	1.45776e-40	C	Bdiv-031190	Bdiv_cow
Bdiv_015750	1.39004e-43	1.02191	0.614	0.381	3.1387e-40	C	Bdiv-015750	Bdiv_cow
Bdiv_034800	2.08545e-40	1.0499	0.479	0.244	4.70894e-37	C	Bdiv-034800	Bdiv_cow
Bdiv_001930c	2.93832e-36	1.14473	0.243	0.083	6.63474e-33	C	Bdiv-001930c	Bdiv_cow
Bdiv_004440	5.97609e-36	1.17662	0.304	0.124	1.3494e-32	C	Bdiv-004440	Bdiv_cow
Bdiv_029730c	1.983e-35	1.01746	0.42	0.208	4.47762e-32	C	Bdiv-029730c	Bdiv_cow
Bdiv_011690	4.18399e-31	1.01371	0.328	0.15	9.44744e-28	C	Bdiv-011690	Bdiv_cow
Bdiv_014510c	1.48238e-29	1.01086	0.261	0.105	3.34721e-26	C	Bdiv-014510c	Bdiv_cow
Bdiv_029460c	1.92192e-29	1.07355	0.184	0.058	4.33969e-26	C	Bdiv-029460c	Bdiv_cow
Bdiv_019380	1.89713e-28	1.00207	0.226	0.085	4.28371e-25	C	Bdiv-019380	Bdiv_cow
Bdiv_024520	0	2.8431	0.827	0.155	0	G	Bdiv-024520	Bdiv_cow
Bdiv_010550	0	1.98731	0.869	0.321	0	G	Bdiv-010550	Bdiv_cow
Bdiv_028150c	0	1.31925	0.982	0.681	0	G	Bdiv-028150c	Bdiv_cow
Bdiv_031540	0	1.25929	0.999	0.898	0	G	Bdiv-031540	Bdiv_cow
Bdiv_037120c	2.24939e-297	1.74995	0.91	0.442	5.07911e-294	G	Bdiv-037120c	Bdiv_cow
Bdiv_030940	4.04186e-285	2.37396	0.675	0.139	9.12653e-282	G	Bdiv-030940	Bdiv_cow
Bdiv_039290c	7.89151e-275	1.67723	0.863	0.366	1.7819e-271	G	Bdiv-039290c	Bdiv_cow
Bdiv_005620c	5.16193e-266	2.4986	0.591	0.089	1.16556e-262	G	Bdiv-005620c	Bdiv_cow
Bdiv_029570	6.36447e-258	1.7372	0.832	0.342	1.4371e-254	G	Bdiv-029570	Bdiv_cow
Bdiv_023320c	2.39444e-252	2.33057	0.617	0.12	5.40665e-249	G	Bdiv-023320c	Bdiv_cow
Bdiv_024560c	2.7275e-218	1.14454	0.933	0.63	6.15869e-215	G	Bdiv-024560c	Bdiv_cow
Bdiv_031930	8.73577e-182	1.00606	0.933	0.63	1.97254e-178	G	Bdiv-031930	Bdiv_cow
Bdiv_029880c	3.29963e-175	1.14866	0.868	0.511	7.45057e-172	G	Bdiv-029880c	Bdiv_cow
Bdiv_010040	3.75115e-174	1.83784	0.593	0.187	8.47009e-171	G	Bdiv-010040	Bdiv_cow
Bdiv_001970c	3.20557e-167	2.04052	0.44	0.073	7.23819e-164	G	Bdiv-001970c	Bdiv_cow
Bdiv_020930c	3.2228e-166	1.7135	0.582	0.177	7.27708e-163	G	Bdiv-020930c	Bdiv_cow
Bdiv_017090c	7.19976e-162	1.44268	0.723	0.34	1.62571e-158	G	Bdiv-017090c	Bdiv_cow
Bdiv_012790	2.46333e-160	1.42884	0.725	0.302	5.5622e-157	G	Bdiv-012790	Bdiv_cow
Bdiv_034880	7.75321e-159	1.81744	0.503	0.124	1.75067e-155	G	Bdiv-034880	Bdiv_cow
Bdiv_030120c	4.19948e-158	1.49297	0.647	0.243	9.48243e-155	G	Bdiv-030120c	Bdiv_cow
Bdiv_036490c	2.38553e-148	1.87254	0.471	0.113	5.38653e-145	G	Bdiv-036490c	Bdiv_cow
Bdiv_040270c	4.16112e-143	1.68477	0.526	0.161	9.39581e-140	G	Bdiv-040270c	Bdiv_cow
Bdiv_014220	6.19572e-143	1.93695	0.392	0.065	1.39899e-139	G	Bdiv-014220	Bdiv_cow
Bdiv_016410c	1.53181e-142	1.36197	0.666	0.286	3.45883e-139	G	Bdiv-016410c	Bdiv_cow
Bdiv_028820c	3.42044e-137	1.78542	0.41	0.082	7.72336e-134	G	Bdiv-028820c	Bdiv_cow
Bdiv_014120c	1.02638e-133	1.57266	0.488	0.14	2.31756e-130	G	Bdiv-014120c	Bdiv_cow
Bdiv_029020c	2.25592e-132	1.29278	0.676	0.314	5.09388e-129	G	Bdiv-029020c	Bdiv_cow
Bdiv_002810c	2.42715e-129	1.53974	0.529	0.184	5.4805e-126	G	Bdiv-002810c	Bdiv_cow
Bdiv_004360	9.01307e-129	1.69231	0.428	0.102	2.03515e-125	G	Bdiv-004360	Bdiv_cow
Bdiv_012780c	1.60501e-120	1.2684	0.583	0.231	3.62411e-117	G	Bdiv-012780c	Bdiv_cow
Bdiv_015660c	4.39783e-115	1.79247	0.359	0.075	9.93029e-112	G	Bdiv-015660c	Bdiv_cow
Bdiv_005060c	1.78535e-114	1.62006	0.399	0.099	4.03133e-111	G	Bdiv-005060c	Bdiv_cow
Bdiv_039850c	2.39838e-114	1.76248	0.295	0.036	5.41554e-111	G	Bdiv-039850c	Bdiv_cow
Bdiv_017520c	2.51021e-109	1.34294	0.496	0.176	5.66806e-106	G	Bdiv-017520c	Bdiv_cow
Bdiv_016220	1.7367e-108	1.40487	0.481	0.165	3.92146e-105	G	Bdiv-016220	Bdiv_cow
Bdiv_010750	1.77634e-108	1.62829	0.319	0.055	4.01098e-105	G	Bdiv-010750	Bdiv_cow
Bdiv_023480	2.56485e-108	1.28216	0.551	0.219	5.79144e-105	G	Bdiv-023480	Bdiv_cow
Bdiv_000900	2.95013e-106	1.35093	0.482	0.162	6.66138e-103	G	Bdiv-000900	Bdiv_cow
Bdiv_010580c	3.69529e-106	1.31078	0.54	0.22	8.34397e-103	G	Bdiv-010580c	Bdiv_cow
Bdiv_024480	5.21523e-105	1.74013	0.292	0.045	1.1776e-101	G	Bdiv-024480	Bdiv_cow
Bdiv_027200	3.30872e-101	1.34981	0.508	0.202	7.47109e-98	G	Bdiv-027200	Bdiv_cow
Bdiv_036320c	1.53269e-100	1.36501	0.485	0.18	3.46082e-97	G	Bdiv-036320c	Bdiv_cow
Bdiv_038560c	1.41545e-99	1.71364	0.283	0.044	3.1961e-96	G	Bdiv-038560c	Bdiv_cow
Bdiv_009150	1.17667e-98	1.67521	0.273	0.039	2.65693e-95	G	Bdiv-009150	Bdiv_cow
Bdiv_025260c	5.53899e-98	1.04904	0.651	0.327	1.2507e-94	G	Bdiv-025260c	Bdiv_cow
Bdiv_036280c	1.44436e-97	1.57565	0.357	0.091	3.26137e-94	G	Bdiv-036280c	Bdiv_cow
Bdiv_031010c	3.89045e-95	1.36608	0.514	0.207	8.78464e-92	G	Bdiv-031010c	Bdiv_cow
Bdiv_010450	1.19466e-93	1.09682	0.598	0.272	2.69754e-90	G	Bdiv-010450	Bdiv_cow
Bdiv_002870	3.63912e-93	1.62569	0.278	0.047	8.21714e-90	G	Bdiv-002870	Bdiv_cow
Bdiv_012740c	1.59719e-91	1.13324	0.555	0.252	3.60645e-88	G	Bdiv-012740c	Bdiv_cow
Bdiv_033760	4.2167e-91	1.151	0.57	0.273	9.52131e-88	G	Bdiv-033760	Bdiv_cow
Bdiv_034270c	1.28178e-90	1.56291	0.281	0.051	2.89427e-87	G	Bdiv-034270c	Bdiv_cow
Bdiv_017100	6.53079e-90	1.355	0.424	0.149	1.47465e-86	G	Bdiv-017100	Bdiv_cow
Bdiv_010500	1.98228e-89	1.66947	0.25	0.035	4.47599e-86	G	Bdiv-010500	Bdiv_cow
Bdiv_024860c	2.2839e-89	1.54465	0.255	0.038	5.15705e-86	G	Bdiv-024860c	Bdiv_cow
Bdiv_015670	4.85739e-89	1.24607	0.481	0.193	1.0968e-85	G	Bdiv-015670	Bdiv_cow
Bdiv_036500c	5.67591e-88	1.49615	0.288	0.059	1.28162e-84	G	Bdiv-036500c	Bdiv_cow
Bdiv_017740	2.14564e-87	1.54194	0.279	0.054	4.84485e-84	G	Bdiv-017740	Bdiv_cow
Bdiv_017260c	3.69604e-85	1.30242	0.404	0.139	8.34567e-82	G	Bdiv-017260c	Bdiv_cow
Bdiv_003820	3.80952e-84	1.53328	0.264	0.048	8.60189e-81	G	Bdiv-003820	Bdiv_cow
Bdiv_002000c	5.25644e-82	1.41876	0.302	0.073	1.1869e-78	G	Bdiv-002000c	Bdiv_cow
Bdiv_015680	5.38203e-82	1.43538	0.312	0.078	1.21526e-78	G	Bdiv-015680	Bdiv_cow
Bdiv_009140c	1.83777e-79	1.4847	0.24	0.04	4.14968e-76	G	Bdiv-009140c	Bdiv_cow
Bdiv_005180c	1.17193e-78	1.35339	0.336	0.099	2.64622e-75	G	Bdiv-005180c	Bdiv_cow
Bdiv_017920	1.7954e-78	1.42869	0.263	0.054	4.054e-75	G	Bdiv-017920	Bdiv_cow
Bdiv_039270	1.799e-77	1.37758	0.306	0.08	4.06214e-74	G	Bdiv-039270	Bdiv_cow
Bdiv_036680c	2.15144e-76	1.43929	0.231	0.038	4.85794e-73	G	Bdiv-036680c	Bdiv_cow
Bdiv_035140	4.59592e-76	1.40025	0.254	0.051	1.03776e-72	G	Bdiv-035140	Bdiv_cow
Bdiv_017200	9.66168e-75	1.43008	0.226	0.036	2.18161e-71	G	Bdiv-017200	Bdiv_cow
Bdiv_014040	2.65846e-73	1.03023	0.527	0.257	6.0028e-70	G	Bdiv-014040	Bdiv_cow
Bdiv_011000	7.47876e-73	1.46547	0.189	0.02	1.6887e-69	G	Bdiv-011000	Bdiv_cow
Bdiv_005510	6.05303e-71	1.10424	0.41	0.16	1.36677e-67	G	Bdiv-005510	Bdiv_cow
Bdiv_032740	1.57786e-70	1.136	0.381	0.138	3.56282e-67	G	Bdiv-032740	Bdiv_cow
Bdiv_032030c	4.35127e-70	1.38624	0.286	0.078	9.82518e-67	G	Bdiv-032030c	Bdiv_cow
Bdiv_006130c	3.83058e-69	1.26151	0.276	0.07	8.64945e-66	G	Bdiv-006130c	Bdiv_cow
Bdiv_002800c	1.59754e-68	1.36173	0.26	0.063	3.60724e-65	G	Bdiv-002800c	Bdiv_cow
Bdiv_033910c	1.64398e-68	1.42362	0.25	0.058	3.7121e-65	G	Bdiv-033910c	Bdiv_cow
Bdiv_039000c	6.78125e-68	1.30396	0.274	0.071	1.53121e-64	G	Bdiv-039000c	Bdiv_cow
Bdiv_002880	1.00242e-67	1.34892	0.248	0.056	2.26346e-64	G	Bdiv-002880	Bdiv_cow
Bdiv_028340c	2.57727e-67	1.21197	0.352	0.126	5.81947e-64	G	Bdiv-028340c	Bdiv_cow
Bdiv_020450	5.19457e-67	1.31055	0.292	0.085	1.17293e-63	G	Bdiv-020450	Bdiv_cow
Bdiv_002570c	1.07681e-66	1.06025	0.444	0.191	2.43143e-63	G	Bdiv-002570c	Bdiv_cow
Bdiv_019100c	4.09342e-66	1.05272	0.447	0.199	9.24294e-63	G	Bdiv-019100c	Bdiv_cow
Bdiv_015190	1.36109e-65	1.31999	0.27	0.072	3.07334e-62	G	Bdiv-015190	Bdiv_cow
Bdiv_004590	1.591e-65	1.3474	0.219	0.043	3.59248e-62	G	Bdiv-004590	Bdiv_cow
Bdiv_033520c	7.56129e-65	1.00374	0.481	0.233	1.70734e-61	G	Bdiv-033520c	Bdiv_cow
Bdiv_019130	9.36971e-65	1.25982	0.28	0.079	2.11568e-61	G	Bdiv-019130	Bdiv_cow
Bdiv_034100	2.01031e-64	1.15218	0.348	0.126	4.53928e-61	G	Bdiv-034100	Bdiv_cow
Bdiv_032440	2.22596e-64	1.40263	0.173	0.019	5.02621e-61	G	Bdiv-032440	Bdiv_cow
Bdiv_014230c	2.2648e-64	1.13912	0.311	0.098	5.11391e-61	G	Bdiv-014230c	Bdiv_cow
Bdiv_026870	1.86558e-63	1.27932	0.228	0.049	4.21247e-60	G	Bdiv-026870	Bdiv_cow
Bdiv_036190	7.47589e-63	1.15845	0.362	0.139	1.68806e-59	G	Bdiv-036190	Bdiv_cow
Bdiv_038790c	1.77933e-62	1.18796	0.268	0.075	4.01774e-59	G	Bdiv-038790c	Bdiv_cow
Bdiv_008590	2.5703e-61	1.26314	0.187	0.03	5.80373e-58	G	Bdiv-008590	Bdiv_cow
Bdiv_017290	3.99271e-61	1.33544	0.206	0.04	9.01554e-58	G	Bdiv-017290	Bdiv_cow
Bdiv_015080c	1.57954e-60	1.2144	0.249	0.065	3.56659e-57	G	Bdiv-015080c	Bdiv_cow
Bdiv_014020c	1.12187e-59	1.01957	0.421	0.189	2.53318e-56	G	Bdiv-014020c	Bdiv_cow
Bdiv_015050	1.317e-59	1.20936	0.26	0.074	2.97378e-56	G	Bdiv-015050	Bdiv_cow
Bdiv_014090c	2.74695e-59	1.1099	0.344	0.131	6.20262e-56	G	Bdiv-014090c	Bdiv_cow
Bdiv_014880c	3.35938e-59	1.06623	0.397	0.17	7.58549e-56	G	Bdiv-014880c	Bdiv_cow
Bdiv_022810c	4.77033e-59	1.35303	0.217	0.049	1.07714e-55	G	Bdiv-022810c	Bdiv_cow
Bdiv_035170c	6.10096e-59	1.04232	0.355	0.138	1.3776e-55	G	Bdiv-035170c	Bdiv_cow
Bdiv_036310	3.32414e-58	1.20253	0.256	0.072	7.5059e-55	G	Bdiv-036310	Bdiv_cow
Bdiv_037340c	3.57946e-58	1.2929	0.189	0.034	8.08243e-55	G	Bdiv-037340c	Bdiv_cow
Bdiv_035660c	8.1653e-58	1.24874	0.172	0.025	1.84373e-54	G	Bdiv-035660c	Bdiv_cow
Bdiv_004600c	2.28509e-57	1.16181	0.265	0.08	5.15973e-54	G	Bdiv-004600c	Bdiv_cow
Bdiv_036620	1.04557e-56	1.15363	0.268	0.082	2.36089e-53	G	Bdiv-036620	Bdiv_cow
Bdiv_030150	1.1855e-56	1.16236	0.174	0.027	2.67687e-53	G	Bdiv-030150	Bdiv_cow
Bdiv_004580	2.40306e-56	1.24829	0.239	0.064	5.4261e-53	G	Bdiv-004580	Bdiv_cow
Bdiv_005420	2.80754e-56	1.13158	0.287	0.095	6.33943e-53	G	Bdiv-005420	Bdiv_cow
Bdiv_040330	3.46671e-56	1.21026	0.274	0.088	7.82783e-53	G	Bdiv-040330	Bdiv_cow
Bdiv_027180	8.38698e-56	1.17756	0.166	0.024	1.89378e-52	G	Bdiv-027180	Bdiv_cow
Bdiv_004070c	5.02081e-55	1.16324	0.223	0.057	1.1337e-51	G	Bdiv-004070c	Bdiv_cow
Bdiv_021680	1.14107e-54	1.16542	0.285	0.097	2.57654e-51	G	Bdiv-021680	Bdiv_cow
Bdiv_023760c	1.40331e-54	1.17244	0.232	0.063	3.16867e-51	G	Bdiv-023760c	Bdiv_cow
Bdiv_040140c	3.55584e-54	1.09927	0.244	0.069	8.0291e-51	G	Bdiv-040140c	Bdiv_cow
Bdiv_036920c	3.69251e-54	1.15635	0.232	0.063	8.33768e-51	G	Bdiv-036920c	Bdiv_cow
Bdiv_009200c	7.03737e-54	1.17669	0.214	0.053	1.58904e-50	G	Bdiv-009200c	Bdiv_cow
Bdiv_005670	1.03583e-53	1.01527	0.327	0.126	2.33891e-50	G	Bdiv-005670	Bdiv_cow
Bdiv_022060	2.27953e-53	1.2015	0.188	0.039	5.14719e-50	G	Bdiv-022060	Bdiv_cow
Bdiv_005160c	2.38614e-53	1.01464	0.32	0.121	5.3879e-50	G	Bdiv-005160c	Bdiv_cow
Bdiv_018000	3.00172e-53	1.05772	0.318	0.121	6.77788e-50	G	Bdiv-018000	Bdiv_cow
Bdiv_033680c	4.27239e-53	1.18168	0.168	0.029	9.64705e-50	G	Bdiv-033680c	Bdiv_cow
Bdiv_005050	9.921e-53	1.16587	0.176	0.033	2.24016e-49	G	Bdiv-005050	Bdiv_cow
Bdiv_015740	1.09887e-52	1.09731	0.301	0.112	2.48124e-49	G	Bdiv-015740	Bdiv_cow
Bdiv_021990c	5.00707e-52	1.21607	0.155	0.023	1.1306e-48	G	Bdiv-021990c	Bdiv_cow
Bdiv_028440c	2.1944e-51	1.08246	0.219	0.058	4.95496e-48	G	Bdiv-028440c	Bdiv_cow
Bdiv_035500	3.2649e-51	1.08049	0.301	0.114	7.37214e-48	G	Bdiv-035500	Bdiv_cow
Bdiv_030960c	6.19407e-51	1.05395	0.294	0.108	1.39862e-47	G	Bdiv-030960c	Bdiv_cow
Bdiv_022460c	2.92348e-50	1.11988	0.14	0.017	6.60123e-47	G	Bdiv-022460c	Bdiv_cow
Bdiv_006080	4.84341e-50	1.11597	0.204	0.051	1.09364e-46	G	Bdiv-006080	Bdiv_cow
Bdiv_005380c	1.6236e-49	1.04061	0.316	0.126	3.66608e-46	G	Bdiv-005380c	Bdiv_cow
Bdiv_029250	3.03443e-49	1.02244	0.293	0.109	6.85175e-46	G	Bdiv-029250	Bdiv_cow
Bdiv_004660	5.11228e-49	1.14628	0.141	0.019	1.15435e-45	G	Bdiv-004660	Bdiv_cow
Bdiv_022740	5.77144e-49	1.22448	0.155	0.026	1.30319e-45	G	Bdiv-022740	Bdiv_cow
Bdiv_002850c	6.51861e-49	1.13389	0.153	0.025	1.4719e-45	G	Bdiv-002850c	Bdiv_cow
Bdiv_021260	1.25511e-48	1.0745	0.304	0.12	2.83404e-45	G	Bdiv-021260	Bdiv_cow
Bdiv_034090c	1.4133e-48	1.16415	0.136	0.017	3.19122e-45	G	Bdiv-034090c	Bdiv_cow
Bdiv_030460	4.21432e-48	1.08656	0.233	0.072	9.51594e-45	G	Bdiv-030460	Bdiv_cow
Bdiv_005640c	4.80878e-48	1.01171	0.339	0.149	1.08582e-44	G	Bdiv-005640c	Bdiv_cow
Bdiv_024050c	3.19567e-47	1.09586	0.136	0.018	7.21582e-44	G	Bdiv-024050c	Bdiv_cow
Bdiv_019480	3.24074e-47	1.08871	0.141	0.02	7.31758e-44	G	Bdiv-019480	Bdiv_cow
Bdiv_037470	4.90356e-47	1.04852	0.238	0.076	1.10722e-43	G	Bdiv-037470	Bdiv_cow
Bdiv_020890c	1.29023e-46	1.02967	0.27	0.098	2.91334e-43	G	Bdiv-020890c	Bdiv_cow
Bdiv_021410	1.967e-46	1.08008	0.253	0.088	4.44148e-43	G	Bdiv-021410	Bdiv_cow
Bdiv_009210	3.78056e-46	1.06078	0.271	0.102	8.53651e-43	G	Bdiv-009210	Bdiv_cow
Bdiv_019800	5.73668e-46	1.14016	0.138	0.02	1.29534e-42	G	Bdiv-019800	Bdiv_cow
Bdiv_038440	1.00202e-44	1.02642	0.262	0.095	2.26255e-41	G	Bdiv-038440	Bdiv_cow
Bdiv_025460	1.89726e-44	1.14805	0.138	0.022	4.28401e-41	G	Bdiv-025460	Bdiv_cow
Bdiv_027620	3.4464e-44	1.12627	0.142	0.024	7.78197e-41	G	Bdiv-027620	Bdiv_cow
Bdiv_005870	4.13997e-44	1.03214	0.244	0.085	9.34805e-41	G	Bdiv-005870	Bdiv_cow
Bdiv_034610c	7.73405e-44	1.05081	0.149	0.028	1.74635e-40	G	Bdiv-034610c	Bdiv_cow
Bdiv_028230c	1.94501e-42	1.01641	0.254	0.094	4.39183e-39	G	Bdiv-028230c	Bdiv_cow
Bdiv_037050	3.30044e-42	1.065	0.186	0.051	7.4524e-39	G	Bdiv-037050	Bdiv_cow
Bdiv_037040c	2.91887e-40	1.01023	0.168	0.043	6.59081e-37	G	Bdiv-037040c	Bdiv_cow
Bdiv_008150c	3.68125e-40	1.02598	0.182	0.051	8.31227e-37	G	Bdiv-008150c	Bdiv_cow
Bdiv_007650	8.82963e-40	1.02696	0.172	0.045	1.99373e-36	G	Bdiv-007650	Bdiv_cow
Bdiv_036890c	1.42531e-39	1.06999	0.129	0.022	3.21835e-36	G	Bdiv-036890c	Bdiv_cow
Bdiv_018230	1.63879e-39	1.01367	0.135	0.025	3.7004e-36	G	Bdiv-018230	Bdiv_cow
Bdiv_034140	2.99867e-39	1.00278	0.191	0.057	6.771e-36	G	Bdiv-034140	Bdiv_cow
Bdiv_030490c	2.62039e-38	1.03598	0.141	0.03	5.91685e-35	G	Bdiv-030490c	Bdiv_cow
Bdiv_020530c	8.42103e-38	1.05111	0.148	0.034	1.90147e-34	G	Bdiv-020530c	Bdiv_cow
Bdiv_010780c	2.39268e-36	1.04653	0.181	0.056	5.40268e-33	G	Bdiv-010780c	Bdiv_cow
Bdiv_034550	1.13716e-34	1.05915	0.142	0.035	2.56772e-31	G	Bdiv-034550	Bdiv_cow
Bdiv_031200c	3.78701e-139	2.51641	0.793	0.17	8.55108e-136	MC	Bdiv-031200c	Bdiv_cow
Bdiv_040360	7.05951e-135	2.39652	0.868	0.217	1.59404e-131	MC	Bdiv-040360	Bdiv_cow
Bdiv_002680c	4.28322e-123	2.59992	0.901	0.333	9.67151e-120	MC	Bdiv-002680c	Bdiv_cow
Bdiv_002420	2.18034e-119	2.10732	0.983	0.396	4.9232e-116	MC	Bdiv-002420	Bdiv_cow
Bdiv_006100	6.98665e-114	2.08679	0.988	0.513	1.57758e-110	MC	Bdiv-006100	Bdiv_cow
Bdiv_037960	2.7998e-99	2.33147	0.798	0.244	6.32196e-96	MC	Bdiv-037960	Bdiv_cow
Bdiv_031730c	8.61273e-98	1.83464	0.983	0.73	1.94475e-94	MC	Bdiv-031730c	Bdiv_cow
Bdiv_038160c	1.802e-95	2.48682	0.64	0.16	4.06892e-92	MC	Bdiv-038160c	Bdiv_cow
Bdiv_004940c	8.71343e-94	2.24671	0.665	0.17	1.96749e-90	MC	Bdiv-004940c	Bdiv_cow
Bdiv_028330	9.85792e-94	1.6797	0.975	0.414	2.22592e-90	MC	Bdiv-028330	Bdiv_cow
Bdiv_019460c	2.0758e-93	2.22052	0.756	0.233	4.68715e-90	MC	Bdiv-019460c	Bdiv_cow
Bdiv_037800c	4.83471e-86	2.15575	0.727	0.238	1.09168e-82	MC	Bdiv-037800c	Bdiv_cow
Bdiv_004410c	1.77395e-83	1.2986	0.996	0.898	4.00559e-80	MC	Bdiv-004410c	Bdiv_cow
Bdiv_012980	1.906e-79	1.54219	0.983	0.559	4.30374e-76	MC	Bdiv-012980	Bdiv_cow
Bdiv_001220	4.81208e-78	2.1289	0.612	0.166	1.08657e-74	MC	Bdiv-001220	Bdiv_cow
Bdiv_024370c	6.4921e-76	1.64068	0.905	0.389	1.46592e-72	MC	Bdiv-024370c	Bdiv_cow
Bdiv_032630c	1.81998e-75	1.47963	0.992	0.503	4.10952e-72	MC	Bdiv-032630c	Bdiv_cow
Bdiv_009180	1.05759e-71	1.33751	0.95	0.42	2.38805e-68	MC	Bdiv-009180	Bdiv_cow
Bdiv_018420c	1.61465e-69	2.06995	0.632	0.199	3.64587e-66	MC	Bdiv-018420c	Bdiv_cow
Bdiv_017800	8.14567e-69	2.00395	0.649	0.218	1.83929e-65	MC	Bdiv-017800	Bdiv_cow
Bdiv_007890	6.47993e-68	1.07644	0.996	0.923	1.46317e-64	MC	Bdiv-007890	Bdiv_cow
Bdiv_028100	1.24589e-65	2.01524	0.579	0.171	2.81322e-62	MC	Bdiv-028100	Bdiv_cow
Bdiv_037780	1.36059e-65	1.57259	0.86	0.443	3.07222e-62	MC	Bdiv-037780	Bdiv_cow
Bdiv_039980c	1.59878e-64	1.29596	0.979	0.49	3.61005e-61	MC	Bdiv-039980c	Bdiv_cow
Bdiv_000810	2.97759e-61	1.80313	0.636	0.212	6.7234e-58	MC	Bdiv-000810	Bdiv_cow
Bdiv_025310	1.5532e-59	1.86452	0.562	0.162	3.50712e-56	MC	Bdiv-025310	Bdiv_cow
Bdiv_023730	1.08462e-58	1.28657	0.946	0.503	2.44907e-55	MC	Bdiv-023730	Bdiv_cow
Bdiv_005010c	6.00384e-58	1.18118	0.967	0.654	1.35567e-54	MC	Bdiv-005010c	Bdiv_cow
Bdiv_028640	9.41379e-58	1.25483	0.926	0.646	2.12563e-54	MC	Bdiv-028640	Bdiv_cow
Bdiv_025340c	1.1728e-57	1.77425	0.574	0.181	2.64819e-54	MC	Bdiv-025340c	Bdiv_cow
Bdiv_020490	4.84366e-57	1.29123	0.905	0.485	1.0937e-53	MC	Bdiv-020490	Bdiv_cow
Bdiv_035640	8.15323e-56	1.35586	0.88	0.54	1.841e-52	MC	Bdiv-035640	Bdiv_cow
Bdiv_009230c	1.25712e-55	1.12893	0.934	0.674	2.83859e-52	MC	Bdiv-009230c	Bdiv_cow
Bdiv_016060	3.43716e-55	1.79979	0.541	0.165	7.76112e-52	MC	Bdiv-016060	Bdiv_cow
Bdiv_038310	6.24589e-55	1.09037	0.946	0.718	1.41032e-51	MC	Bdiv-038310	Bdiv_cow
Bdiv_010140c	1.65005e-54	1.22059	0.95	0.531	3.72582e-51	MC	Bdiv-010140c	Bdiv_cow
Bdiv_030890	7.17668e-52	1.974	0.393	0.093	1.62049e-48	MC	Bdiv-030890	Bdiv_cow
Bdiv_002460	1.21512e-50	1.23086	0.847	0.519	2.74375e-47	MC	Bdiv-002460	Bdiv_cow
Bdiv_005460c	9.83093e-50	1.08059	0.946	0.769	2.21982e-46	MC	Bdiv-005460c	Bdiv_cow
Bdiv_028170c	3.64321e-49	1.67888	0.645	0.268	8.22638e-46	MC	Bdiv-028170c	Bdiv_cow
Bdiv_022850c	2.08564e-47	1.36658	0.843	0.544	4.70937e-44	MC	Bdiv-022850c	Bdiv_cow
Bdiv_005540	6.05536e-44	1.61214	0.587	0.237	1.3673e-40	MC	Bdiv-005540	Bdiv_cow
Bdiv_020970	1.11675e-43	1.6846	0.558	0.217	2.52163e-40	MC	Bdiv-020970	Bdiv_cow
Bdiv_038320	2.34331e-41	1.18967	0.839	0.523	5.29118e-38	MC	Bdiv-038320	Bdiv_cow
Bdiv_020680c	1.65358e-40	1.52526	0.715	0.435	3.73379e-37	MC	Bdiv-020680c	Bdiv_cow
Bdiv_014590c	1.71537e-40	1.01369	0.95	0.687	3.8733e-37	MC	Bdiv-014590c	Bdiv_cow
Bdiv_000940c	5.03886e-40	1.58771	0.467	0.153	1.13777e-36	MC	Bdiv-000940c	Bdiv_cow
Bdiv_027890	7.45767e-40	1.20717	0.814	0.575	1.68394e-36	MC	Bdiv-027890	Bdiv_cow
Bdiv_005370c	7.48754e-40	1.67786	0.545	0.225	1.69069e-36	MC	Bdiv-005370c	Bdiv_cow
Bdiv_036290	4.59033e-39	1.41105	0.674	0.334	1.0365e-35	MC	Bdiv-036290	Bdiv_cow
Bdiv_000370c	2.48082e-38	1.38766	0.512	0.176	5.6017e-35	MC	Bdiv-000370c	Bdiv_cow
Bdiv_013520c	3.78362e-38	1.35747	0.715	0.39	8.54341e-35	MC	Bdiv-013520c	Bdiv_cow
Bdiv_020190c	1.66108e-37	1.58567	0.483	0.181	3.75072e-34	MC	Bdiv-020190c	Bdiv_cow
Bdiv_030430c	4.8488e-37	1.38524	0.649	0.31	1.09486e-33	MC	Bdiv-030430c	Bdiv_cow
Bdiv_002520c	2.14752e-36	1.41621	0.657	0.357	4.8491e-33	MC	Bdiv-002520c	Bdiv_cow
Bdiv_011800	1.24759e-35	1.67115	0.293	0.071	2.81706e-32	MC	Bdiv-011800	Bdiv_cow
Bdiv_015820c	2.78414e-35	1.25963	0.616	0.27	6.2866e-32	MC	Bdiv-015820c	Bdiv_cow
Bdiv_020690	4.64846e-35	1.54303	0.665	0.388	1.04962e-31	MC	Bdiv-020690	Bdiv_cow
Bdiv_034350c	2.46395e-33	1.10446	0.587	0.247	5.56359e-30	MC	Bdiv-034350c	Bdiv_cow
Bdiv_037760	5.90426e-33	1.4438	0.521	0.22	1.33318e-29	MC	Bdiv-037760	Bdiv_cow
Bdiv_038490	1.06891e-32	1.15962	0.682	0.344	2.41359e-29	MC	Bdiv-038490	Bdiv_cow
Bdiv_016990c	3.49849e-32	1.32964	0.599	0.286	7.8996e-29	MC	Bdiv-016990c	Bdiv_cow
Bdiv_034910c	1.03944e-31	1.61277	0.335	0.1	2.34705e-28	MC	Bdiv-034910c	Bdiv_cow
Bdiv_031210	1.17239e-31	1.3541	0.562	0.265	2.64727e-28	MC	Bdiv-031210	Bdiv_cow
Bdiv_039410c	1.48098e-31	1.60902	0.269	0.066	3.34405e-28	MC	Bdiv-039410c	Bdiv_cow
Bdiv_014940	1.60981e-31	1.37384	0.579	0.303	3.63496e-28	MC	Bdiv-014940	Bdiv_cow
Bdiv_017400c	1.70269e-30	1.40983	0.595	0.326	3.84467e-27	MC	Bdiv-017400c	Bdiv_cow
Bdiv_011790c	3.61198e-29	1.58684	0.231	0.054	8.15585e-26	MC	Bdiv-011790c	Bdiv_cow
Bdiv_002510c	1.82451e-28	1.30645	0.504	0.224	4.11974e-25	MC	Bdiv-002510c	Bdiv_cow
Bdiv_011270c	9.12841e-27	1.4284	0.36	0.127	2.0612e-23	MC	Bdiv-011270c	Bdiv_cow
Bdiv_005280c	1.13585e-26	1.25328	0.612	0.371	2.56474e-23	MC	Bdiv-005280c	Bdiv_cow
Bdiv_020240c	1.20909e-26	1.59677	0.231	0.058	2.73013e-23	MC	Bdiv-020240c	Bdiv_cow
Bdiv_000820	1.94728e-26	1.4101	0.45	0.192	4.39695e-23	MC	Bdiv-000820	Bdiv_cow
Bdiv_027570c	6.58124e-26	1.06066	0.624	0.333	1.48604e-22	MC	Bdiv-027570c	Bdiv_cow
Bdiv_030420c	7.53676e-26	1.29613	0.508	0.242	1.7018e-22	MC	Bdiv-030420c	Bdiv_cow
Bdiv_033350	7.98926e-26	1.41387	0.273	0.08	1.80398e-22	MC	Bdiv-033350	Bdiv_cow
Bdiv_035020c	1.05663e-24	1.09731	0.661	0.417	2.38586e-21	MC	Bdiv-035020c	Bdiv_cow
Bdiv_018790	8.35765e-24	1.35731	0.347	0.13	1.88716e-20	MC	Bdiv-018790	Bdiv_cow
Bdiv_039230	8.88982e-24	1.12397	0.612	0.365	2.00732e-20	MC	Bdiv-039230	Bdiv_cow
Bdiv_005000c	6.49547e-22	1.04448	0.554	0.297	1.46668e-18	MC	Bdiv-005000c	Bdiv_cow
Bdiv_015200	1.02089e-20	1.01378	0.657	0.447	2.30517e-17	MC	Bdiv-015200	Bdiv_cow
Bdiv_029730c	4.57208e-19	1.20801	0.446	0.23	1.03238e-15	MC	Bdiv-029730c	Bdiv_cow
Bdiv_013260	5.33456e-18	1.30579	0.223	0.072	1.20454e-14	MC	Bdiv-013260	Bdiv_cow
Bdiv_029800c	1.43017e-17	1.16276	0.182	0.051	3.22932e-14	MC	Bdiv-029800c	Bdiv_cow
Bdiv_017690c	2.58533e-17	1.14914	0.467	0.261	5.83767e-14	MC	Bdiv-017690c	Bdiv_cow
Bdiv_015030	1.52501e-16	1.14579	0.293	0.117	3.44347e-13	MC	Bdiv-015030	Bdiv_cow
Bdiv_011090c	1.74781e-16	1.16269	0.397	0.203	3.94657e-13	MC	Bdiv-011090c	Bdiv_cow
Bdiv_036750c	1.46276e-14	1.04366	0.252	0.099	3.30292e-11	MC	Bdiv-036750c	Bdiv_cow
Bdiv_023260c	2.86107e-14	1.14522	0.244	0.096	6.4603e-11	MC	Bdiv-023260c	Bdiv_cow
Bdiv_022910c	3.04271e-14	1.20433	0.298	0.134	6.87044e-11	MC	Bdiv-022910c	Bdiv_cow
Bdiv_010170c	9.93902e-14	1.11433	0.227	0.087	2.24423e-10	MC	Bdiv-010170c	Bdiv_cow
Bdiv_038660	7.72461e-13	1.05342	0.298	0.14	1.74422e-09	MC	Bdiv-038660	Bdiv_cow
Bdiv_015260c	1.09645e-12	1.13318	0.256	0.112	2.47578e-09	MC	Bdiv-015260c	Bdiv_cow
Bdiv_004840	1.18998e-12	1.13517	0.269	0.123	2.68698e-09	MC	Bdiv-004840	Bdiv_cow
Bdiv_023040	1.73079e-12	1.10562	0.219	0.088	3.90812e-09	MC	Bdiv-023040	Bdiv_cow
Bdiv_002380c	1.75584e-12	1.14283	0.215	0.086	3.96469e-09	MC	Bdiv-002380c	Bdiv_cow
Bdiv_023290c	6.93275e-12	1.06539	0.264	0.121	1.56541e-08	MC	Bdiv-023290c	Bdiv_cow
Bdiv_022680	7.9605e-12	1.08309	0.364	0.208	1.79748e-08	MC	Bdiv-022680	Bdiv_cow
Bdiv_016660c	1.13051e-11	1.03478	0.318	0.166	2.5527e-08	MC	Bdiv-016660c	Bdiv_cow
Bdiv_030700c	1.5968e-11	1.09281	0.252	0.115	3.60557e-08	MC	Bdiv-030700c	Bdiv_cow
Bdiv_016270c	1.80678e-11	1.07936	0.36	0.21	4.07971e-08	MC	Bdiv-016270c	Bdiv_cow
Bdiv_011280	5.78935e-11	1.14055	0.169	0.064	1.30724e-07	MC	Bdiv-011280	Bdiv_cow
Bdiv_003680c	1.306e-10	1.09193	0.306	0.162	2.94895e-07	MC	Bdiv-003680c	Bdiv_cow
Bdiv_009340	1.02872e-09	1.06338	0.269	0.143	2.32285e-06	MC	Bdiv-009340	Bdiv_cow
Bdiv_023430c	2.07456e-08	1.00847	0.223	0.111	4.68435e-05	MC	Bdiv-023430c	Bdiv_cow

## Sheet: Bdiv_human cell cycle markers
GeneID	p_val	avg_log2FC	pct.1	pct.2	p_val_adj	cluster	gene	spp
Bdiv_023990c	0	3.69239	0.887	0.102	0	C	Bdiv-023990c	Bdiv_human
Bdiv_013580c	0	3.50149	0.99	0.308	0	C	Bdiv-013580c	Bdiv_human
Bdiv_009180	1.35486e-307	3.04131	0.991	0.376	2.82353e-304	C	Bdiv-009180	Bdiv_human
Bdiv_003910c	1.58357e-306	2.93889	0.983	0.52	3.30016e-303	C	Bdiv-003910c	Bdiv_human
Bdiv_028030	1.66703e-297	4.78882	0.784	0.062	3.47409e-294	C	Bdiv-028030	Bdiv_human
Bdiv_006490c	1.95232e-274	3.26984	0.849	0.171	4.06864e-271	C	Bdiv-006490c	Bdiv_human
Bdiv_021160	3.16589e-270	1.82548	0.996	0.829	6.59772e-267	C	Bdiv-021160	Bdiv_human
Bdiv_028330	2.61091e-266	2.46394	0.974	0.384	5.44113e-263	C	Bdiv-028330	Bdiv_human
Bdiv_009230c	1.22026e-261	2.66827	0.974	0.585	2.54301e-258	C	Bdiv-009230c	Bdiv_human
Bdiv_007890	2.05171e-258	1.7844	1	0.868	4.27576e-255	C	Bdiv-007890	Bdiv_human
Bdiv_039280c	4.90903e-254	2.63812	0.91	0.3	1.02304e-250	C	Bdiv-039280c	Bdiv_human
Bdiv_010240c	3.1534e-252	3.39203	0.726	0.076	6.57169e-249	C	Bdiv-010240c	Bdiv_human
Bdiv_003870c	8.83812e-241	3.1043	0.775	0.135	1.84186e-237	C	Bdiv-003870c	Bdiv_human
Bdiv_033990c	2.19571e-207	2.66172	0.766	0.172	4.57586e-204	C	Bdiv-033990c	Bdiv_human
Bdiv_038310	4.82028e-180	1.62158	0.955	0.647	1.00455e-176	C	Bdiv-038310	Bdiv_human
Bdiv_034350c	3.2699e-176	2.57586	0.718	0.179	6.81448e-173	C	Bdiv-034350c	Bdiv_human
Bdiv_004890c	1.79488e-152	1.26136	0.958	0.812	3.74052e-149	C	Bdiv-004890c	Bdiv_human
Bdiv_037320c	3.11959e-137	3.3296	0.434	0.036	6.50123e-134	C	Bdiv-037320c	Bdiv_human
Bdiv_013880c	4.78857e-136	3.19535	0.428	0.033	9.97938e-133	C	Bdiv-013880c	Bdiv_human
Bdiv_032880	1.09334e-134	2.5688	0.516	0.083	2.27852e-131	C	Bdiv-032880	Bdiv_human
Bdiv_002420	2.27975e-126	1.57341	0.864	0.398	4.75101e-123	C	Bdiv-002420	Bdiv_human
Bdiv_025340c	4.19443e-125	2.28773	0.564	0.126	8.74119e-122	C	Bdiv-025340c	Bdiv_human
Bdiv_035640	9.86554e-117	1.5237	0.83	0.476	2.05598e-113	C	Bdiv-035640	Bdiv_human
Bdiv_001770c	8.64045e-112	1.69745	0.751	0.352	1.80067e-108	C	Bdiv-001770c	Bdiv_human
Bdiv_027870	4.27916e-109	2.2024	0.57	0.167	8.91776e-106	C	Bdiv-027870	Bdiv_human
Bdiv_013120c	1.62287e-102	2.44572	0.434	0.08	3.38206e-99	C	Bdiv-013120c	Bdiv_human
Bdiv_024410	6.70424e-96	1.8212	0.618	0.241	1.39716e-92	C	Bdiv-024410	Bdiv_human
Bdiv_000690c	2.36784e-94	2.11841	0.504	0.141	4.93457e-91	C	Bdiv-000690c	Bdiv_human
Bdiv_032710	3.22584e-91	1.53786	0.695	0.344	6.72265e-88	C	Bdiv-032710	Bdiv_human
Bdiv_005540	7.22359e-77	1.72127	0.53	0.185	1.5054e-73	C	Bdiv-005540	Bdiv_human
Bdiv_036750c	1.58231e-72	1.94409	0.374	0.082	3.29754e-69	C	Bdiv-036750c	Bdiv_human
Bdiv_002410c	1.2831e-68	1.0163	0.82	0.572	2.67398e-65	C	Bdiv-002410c	Bdiv_human
Bdiv_040540	2.36928e-67	2.00982	0.366	0.089	4.93758e-64	C	Bdiv-040540	Bdiv_human
Bdiv_028640	6.75187e-66	1.13523	0.825	0.636	1.40709e-62	C	Bdiv-028640	Bdiv_human
Bdiv_032850c	4.42215e-64	1.75997	0.429	0.136	9.21576e-61	C	Bdiv-032850c	Bdiv_human
Bdiv_015420c	1.21107e-60	1.61992	0.489	0.204	2.52388e-57	C	Bdiv-015420c	Bdiv_human
Bdiv_004390c	1.9389e-54	1.01644	0.719	0.484	4.04067e-51	C	Bdiv-004390c	Bdiv_human
Bdiv_010630	5.79721e-52	1.27997	0.574	0.298	1.20814e-48	C	Bdiv-010630	Bdiv_human
Bdiv_023270	4.82983e-51	1.62714	0.471	0.226	1.00654e-47	C	Bdiv-023270	Bdiv_human
Bdiv_035020c	9.79548e-45	1.11494	0.593	0.344	2.04138e-41	C	Bdiv-035020c	Bdiv_human
Bdiv_004710	3.82186e-39	1.17689	0.531	0.312	7.96476e-36	C	Bdiv-004710	Bdiv_human
Bdiv_035970	3.86444e-39	1.26089	0.414	0.188	8.0535e-36	C	Bdiv-035970	Bdiv_human
Bdiv_002520c	3.97296e-39	1.22599	0.432	0.198	8.27965e-36	C	Bdiv-002520c	Bdiv_human
Bdiv_005030c	7.53885e-39	1.31194	0.44	0.212	1.5711e-35	C	Bdiv-005030c	Bdiv_human
Bdiv_020470c	2.03286e-38	1.39184	0.356	0.144	4.23649e-35	C	Bdiv-020470c	Bdiv_human
Bdiv_037350c	6.23405e-38	1.12946	0.53	0.312	1.29918e-34	C	Bdiv-037350c	Bdiv_human
Bdiv_021640	4.39365e-36	1.24601	0.451	0.239	9.15637e-33	C	Bdiv-021640	Bdiv_human
Bdiv_001550	6.99704e-36	1.05956	0.546	0.334	1.45818e-32	C	Bdiv-001550	Bdiv_human
Bdiv_005370c	2.122e-32	1.21588	0.362	0.159	4.42225e-29	C	Bdiv-005370c	Bdiv_human
Bdiv_028170c	2.95541e-31	1.01005	0.442	0.221	6.15908e-28	C	Bdiv-028170c	Bdiv_human
Bdiv_014870	6.63672e-31	1.28442	0.326	0.141	1.38309e-27	C	Bdiv-014870	Bdiv_human
Bdiv_035870	2.1098e-29	1.05664	0.455	0.258	4.39682e-26	C	Bdiv-035870	Bdiv_human
Bdiv_020210c	1.53969e-25	1.1251	0.4	0.227	3.20872e-22	C	Bdiv-020210c	Bdiv_human
Bdiv_034800	1.96289e-25	1.02952	0.426	0.248	4.09066e-22	C	Bdiv-034800	Bdiv_human
Bdiv_001930c	1.79118e-23	1.2982	0.25	0.106	3.73282e-20	C	Bdiv-001930c	Bdiv_human
Bdiv_012610c	2.29572e-23	1.02301	0.42	0.248	4.78428e-20	C	Bdiv-012610c	Bdiv_human
Bdiv_004440	9.0749e-23	1.23388	0.24	0.099	1.89121e-19	C	Bdiv-004440	Bdiv_human
Bdiv_015850c	2.6875e-17	1.0501	0.271	0.142	5.60074e-14	C	Bdiv-015850c	Bdiv_human
Bdiv_016310c	3.8138e-248	2.68399	0.956	0.277	7.94796e-245	SM	Bdiv-016310c	Bdiv_human
Bdiv_000760c	1.63979e-234	3.19006	0.679	0.053	3.41732e-231	SM	Bdiv-000760c	Bdiv_human
Bdiv_010140c	1.83335e-227	2.40678	0.946	0.279	3.82069e-224	SM	Bdiv-010140c	Bdiv_human
Bdiv_034020c	4.68421e-220	2.68522	0.82	0.156	9.76189e-217	SM	Bdiv-034020c	Bdiv_human
Bdiv_039980c	8.4814e-217	2.44719	0.879	0.196	1.76752e-213	SM	Bdiv-039980c	Bdiv_human
Bdiv_030660	4.83695e-205	3.02046	0.628	0.055	1.00802e-201	SM	Bdiv-030660	Bdiv_human
Bdiv_020490	6.75963e-204	2.36806	0.892	0.241	1.40871e-200	SM	Bdiv-020490	Bdiv_human
Bdiv_032630c	8.63305e-198	2.08294	0.946	0.296	1.79913e-194	SM	Bdiv-032630c	Bdiv_human
Bdiv_022340	7.8994e-197	2.64706	0.784	0.161	1.64623e-193	SM	Bdiv-022340	Bdiv_human
Bdiv_005010c	1.91532e-186	2.00707	0.957	0.389	3.99153e-183	SM	Bdiv-005010c	Bdiv_human
Bdiv_012980	2.6114e-169	1.8055	0.943	0.346	5.44217e-166	SM	Bdiv-012980	Bdiv_human
Bdiv_033720	8.42036e-168	1.99656	0.866	0.275	1.7548e-164	SM	Bdiv-033720	Bdiv_human
Bdiv_023730	1.43181e-161	2.03575	0.843	0.242	2.98389e-158	SM	Bdiv-023730	Bdiv_human
Bdiv_024370c	2.07179e-159	2.23228	0.703	0.135	4.31761e-156	SM	Bdiv-024370c	Bdiv_human
Bdiv_039100	7.98208e-155	2.20665	0.775	0.225	1.66347e-151	SM	Bdiv-039100	Bdiv_human
Bdiv_004640c	1.82468e-154	2.71292	0.487	0.041	3.80264e-151	SM	Bdiv-004640c	Bdiv_human
Bdiv_014590c	2.93581e-150	1.74715	0.907	0.371	6.11823e-147	SM	Bdiv-014590c	Bdiv_human
Bdiv_019540c	3.40168e-147	2.23977	0.767	0.24	7.08911e-144	SM	Bdiv-019540c	Bdiv_human
Bdiv_015820c	6.10948e-140	2.06407	0.585	0.088	1.27321e-136	SM	Bdiv-015820c	Bdiv_human
Bdiv_016930	1.25195e-138	2.18066	0.639	0.131	2.60906e-135	SM	Bdiv-016930	Bdiv_human
Bdiv_011450c	2.28716e-134	2.18996	0.748	0.23	4.76644e-131	SM	Bdiv-011450c	Bdiv_human
Bdiv_022900	2.64201e-130	2.18937	0.533	0.08	5.50595e-127	SM	Bdiv-022900	Bdiv_human
Bdiv_005150	2.81578e-127	2.57501	0.436	0.044	5.86808e-124	SM	Bdiv-005150	Bdiv_human
Bdiv_038490	2.27276e-125	2.22791	0.534	0.087	4.73642e-122	SM	Bdiv-038490	Bdiv_human
Bdiv_016250	5.84295e-124	2.11738	0.584	0.118	1.21767e-120	SM	Bdiv-016250	Bdiv_human
Bdiv_004320	8.75738e-123	1.62543	0.836	0.32	1.82504e-119	SM	Bdiv-004320	Bdiv_human
Bdiv_013610	1.15708e-122	2.35152	0.511	0.084	2.41135e-119	SM	Bdiv-013610	Bdiv_human
Bdiv_009450	4.37404e-120	2.18181	0.482	0.066	9.11551e-117	SM	Bdiv-009450	Bdiv_human
Bdiv_038320	4.44929e-120	1.68678	0.844	0.352	9.27231e-117	SM	Bdiv-038320	Bdiv_human
Bdiv_021450	1.25447e-118	1.64562	0.852	0.386	2.61431e-115	SM	Bdiv-021450	Bdiv_human
Bdiv_034720	9.63693e-118	2.27615	0.462	0.064	2.00834e-114	SM	Bdiv-034720	Bdiv_human
Bdiv_004410c	1.7239e-117	1.19793	0.99	0.816	3.5926e-114	SM	Bdiv-004410c	Bdiv_human
Bdiv_017670c	2.91052e-116	1.89287	0.651	0.167	6.06552e-113	SM	Bdiv-017670c	Bdiv_human
Bdiv_001620c	8.83121e-115	2.13338	0.507	0.085	1.84043e-111	SM	Bdiv-001620c	Bdiv_human
Bdiv_037960	4.69274e-114	2.17428	0.548	0.107	9.77967e-111	SM	Bdiv-037960	Bdiv_human
Bdiv_032340c	1.72628e-113	2.92214	0.313	0.012	3.59757e-110	SM	Bdiv-032340c	Bdiv_human
Bdiv_015990c	1.62743e-112	2.41409	0.336	0.019	3.39156e-109	SM	Bdiv-015990c	Bdiv_human
Bdiv_019030	1.39987e-110	2.13772	0.549	0.118	2.91733e-107	SM	Bdiv-019030	Bdiv_human
Bdiv_027330	1.44363e-110	2.19074	0.474	0.072	3.00852e-107	SM	Bdiv-027330	Bdiv_human
Bdiv_013990	1.85313e-108	2.18745	0.475	0.079	3.86192e-105	SM	Bdiv-013990	Bdiv_human
Bdiv_037780	1.18856e-106	1.85949	0.626	0.165	2.47696e-103	SM	Bdiv-037780	Bdiv_human
Bdiv_000370c	8.41337e-105	2.273	0.438	0.063	1.75335e-101	SM	Bdiv-000370c	Bdiv_human
Bdiv_019910	1.82053e-104	1.89203	0.544	0.117	3.79398e-101	SM	Bdiv-019910	Bdiv_human
Bdiv_031070	1.05603e-103	2.32361	0.305	0.016	2.20076e-100	SM	Bdiv-031070	Bdiv_human
Bdiv_026840c	1.93947e-100	2.78634	0.313	0.022	4.04185e-97	SM	Bdiv-026840c	Bdiv_human
Bdiv_005110	1.64122e-99	2.24681	0.331	0.027	3.4203e-96	SM	Bdiv-005110	Bdiv_human
Bdiv_011320	1.70915e-98	1.7669	0.656	0.209	3.56188e-95	SM	Bdiv-011320	Bdiv_human
Bdiv_027570c	1.70012e-97	1.78765	0.552	0.13	3.54306e-94	SM	Bdiv-027570c	Bdiv_human
Bdiv_017140	2.77288e-97	2.00338	0.436	0.07	5.77867e-94	SM	Bdiv-017140	Bdiv_human
Bdiv_019630	4.33253e-95	2.07829	0.364	0.042	9.02899e-92	SM	Bdiv-019630	Bdiv_human
Bdiv_037570c	5.02132e-95	1.3448	0.843	0.407	1.04644e-91	SM	Bdiv-037570c	Bdiv_human
Bdiv_025310	5.69184e-95	2.22096	0.384	0.05	1.18618e-91	SM	Bdiv-025310	Bdiv_human
Bdiv_031650c	1.41051e-93	2.10634	0.41	0.064	2.93951e-90	SM	Bdiv-031650c	Bdiv_human
Bdiv_039530	7.00764e-92	1.7494	0.592	0.174	1.46039e-88	SM	Bdiv-039530	Bdiv_human
Bdiv_018110c	2.11551e-91	2.11797	0.343	0.038	4.40872e-88	SM	Bdiv-018110c	Bdiv_human
Bdiv_033980	6.02206e-89	1.73561	0.728	0.307	1.255e-85	SM	Bdiv-033980	Bdiv_human
Bdiv_028580c	6.21729e-88	2.44423	0.238	0.007	1.29568e-84	SM	Bdiv-028580c	Bdiv_human
Bdiv_020020c	5.4228e-86	1.70112	0.536	0.139	1.13011e-82	SM	Bdiv-020020c	Bdiv_human
Bdiv_015780c	6.63279e-86	2.43177	0.507	0.145	1.38227e-82	SM	Bdiv-015780c	Bdiv_human
Bdiv_010620	2.77921e-85	2.20551	0.287	0.024	5.79187e-82	SM	Bdiv-010620	Bdiv_human
Bdiv_040360	2.01425e-84	1.73427	0.489	0.111	4.19769e-81	SM	Bdiv-040360	Bdiv_human
Bdiv_009640c	1.27392e-82	1.29472	0.826	0.428	2.65485e-79	SM	Bdiv-009640c	Bdiv_human
Bdiv_024900c	9.08013e-82	2.24216	0.231	0.009	1.8923e-78	SM	Bdiv-024900c	Bdiv_human
Bdiv_005000c	6.32165e-81	1.83168	0.411	0.079	1.31743e-77	SM	Bdiv-005000c	Bdiv_human
Bdiv_016990c	4.03135e-80	1.65868	0.379	0.061	8.40134e-77	SM	Bdiv-016990c	Bdiv_human
Bdiv_017390	1.14875e-77	1.80757	0.416	0.085	2.394e-74	SM	Bdiv-017390	Bdiv_human
Bdiv_011310c	1.25979e-77	1.80439	0.487	0.123	2.6254e-74	SM	Bdiv-011310c	Bdiv_human
Bdiv_029480c	1.42913e-76	1.68908	0.364	0.06	2.9783e-73	SM	Bdiv-029480c	Bdiv_human
Bdiv_014150	8.10277e-76	1.65482	0.297	0.033	1.68862e-72	SM	Bdiv-014150	Bdiv_human
Bdiv_003890	1.00533e-75	1.55594	0.536	0.162	2.09511e-72	SM	Bdiv-003890	Bdiv_human
Bdiv_000800c	4.19644e-75	1.6743	0.462	0.116	8.74538e-72	SM	Bdiv-000800c	Bdiv_human
Bdiv_001720c	5.60572e-75	1.52699	0.57	0.183	1.16823e-71	SM	Bdiv-001720c	Bdiv_human
Bdiv_030430c	7.64283e-75	1.60001	0.507	0.137	1.59277e-71	SM	Bdiv-030430c	Bdiv_human
Bdiv_024360	1.55605e-74	1.7268	0.413	0.089	3.24282e-71	SM	Bdiv-024360	Bdiv_human
Bdiv_009410	7.93468e-73	1.98549	0.221	0.012	1.65359e-69	SM	Bdiv-009410	Bdiv_human
Bdiv_033440	9.09749e-73	1.86585	0.277	0.03	1.89592e-69	SM	Bdiv-033440	Bdiv_human
Bdiv_039780c	3.00757e-72	1.55371	0.598	0.223	6.26777e-69	SM	Bdiv-039780c	Bdiv_human
Bdiv_005460c	1.05561e-71	1.22099	0.8	0.432	2.1999e-68	SM	Bdiv-005460c	Bdiv_human
Bdiv_036410	1.64246e-69	1.61768	0.389	0.082	3.42288e-66	SM	Bdiv-036410	Bdiv_human
Bdiv_016330	3.00267e-69	1.87484	0.233	0.018	6.25756e-66	SM	Bdiv-016330	Bdiv_human
Bdiv_035340c	5.35523e-68	1.69033	0.321	0.053	1.11603e-64	SM	Bdiv-035340c	Bdiv_human
Bdiv_000810	5.99297e-68	1.61392	0.438	0.109	1.24894e-64	SM	Bdiv-000810	Bdiv_human
Bdiv_022660c	3.13425e-66	1.3217	0.626	0.251	6.53177e-63	SM	Bdiv-022660c	Bdiv_human
Bdiv_002670	2.8859e-65	1.73104	0.338	0.064	6.01422e-62	SM	Bdiv-002670	Bdiv_human
Bdiv_003130c	7.50957e-65	1.96115	0.2	0.011	1.56499e-61	SM	Bdiv-003130c	Bdiv_human
Bdiv_013740c	7.87501e-65	1.82672	0.185	0.007	1.64115e-61	SM	Bdiv-013740c	Bdiv_human
Bdiv_015030	1.07375e-64	1.67348	0.27	0.035	2.23769e-61	SM	Bdiv-015030	Bdiv_human
Bdiv_015140c	1.07845e-64	1.47847	0.552	0.19	2.24749e-61	SM	Bdiv-015140c	Bdiv_human
Bdiv_004760c	1.09934e-64	1.66879	0.321	0.057	2.29102e-61	SM	Bdiv-004760c	Bdiv_human
Bdiv_031830	2.09629e-64	1.81577	0.251	0.029	4.36867e-61	SM	Bdiv-031830	Bdiv_human
Bdiv_000940c	3.47274e-64	1.87691	0.334	0.065	7.23718e-61	SM	Bdiv-000940c	Bdiv_human
Bdiv_016320	5.05248e-64	1.20139	0.685	0.295	1.05294e-60	SM	Bdiv-016320	Bdiv_human
Bdiv_016060	6.24999e-64	1.91059	0.272	0.037	1.3025e-60	SM	Bdiv-016060	Bdiv_human
Bdiv_020310	2.23559e-63	1.77941	0.364	0.082	4.65897e-60	SM	Bdiv-020310	Bdiv_human
Bdiv_032780	9.83165e-63	1.68574	0.29	0.046	2.04892e-59	SM	Bdiv-032780	Bdiv_human
Bdiv_027890	1.02986e-60	1.13928	0.774	0.43	2.14624e-57	SM	Bdiv-027890	Bdiv_human
Bdiv_037760	1.12135e-60	1.50363	0.346	0.073	2.33688e-57	SM	Bdiv-037760	Bdiv_human
Bdiv_017880	3.46289e-60	1.62829	0.38	0.093	7.21667e-57	SM	Bdiv-017880	Bdiv_human
Bdiv_011490	1.59844e-59	1.84138	0.238	0.029	3.33114e-56	SM	Bdiv-011490	Bdiv_human
Bdiv_014780	1.50529e-58	1.56146	0.29	0.05	3.13702e-55	SM	Bdiv-014780	Bdiv_human
Bdiv_004730	2.58906e-58	1.53662	0.298	0.054	5.3956e-55	SM	Bdiv-004730	Bdiv_human
Bdiv_035650	2.08259e-57	1.70231	0.215	0.022	4.34011e-54	SM	Bdiv-035650	Bdiv_human
Bdiv_030420c	6.82616e-57	1.39549	0.372	0.091	1.42257e-53	SM	Bdiv-030420c	Bdiv_human
Bdiv_018010c	8.6177e-57	1.71534	0.223	0.026	1.79593e-53	SM	Bdiv-018010c	Bdiv_human
Bdiv_014630	1.0597e-56	1.69763	0.267	0.044	2.20842e-53	SM	Bdiv-014630	Bdiv_human
Bdiv_034980c	5.20827e-56	1.33639	0.467	0.149	1.0854e-52	SM	Bdiv-034980c	Bdiv_human
Bdiv_023160	8.13719e-56	1.63763	0.146	0.003	1.69579e-52	SM	Bdiv-023160	Bdiv_human
Bdiv_016010	6.62247e-55	1.53614	0.216	0.025	1.38012e-51	SM	Bdiv-016010	Bdiv_human
Bdiv_003170c	9.1246e-55	1.19847	0.685	0.35	1.90157e-51	SM	Bdiv-003170c	Bdiv_human
Bdiv_013030c	1.16203e-54	1.62167	0.246	0.036	2.42167e-51	SM	Bdiv-013030c	Bdiv_human
Bdiv_029910c	2.1514e-54	1.20988	0.562	0.22	4.48351e-51	SM	Bdiv-029910c	Bdiv_human
Bdiv_007790	2.26789e-54	1.76513	0.28	0.053	4.72627e-51	SM	Bdiv-007790	Bdiv_human
Bdiv_004650	2.53608e-54	1.5439	0.308	0.064	5.28519e-51	SM	Bdiv-004650	Bdiv_human
Bdiv_025210	1.50241e-53	1.49356	0.308	0.065	3.13101e-50	SM	Bdiv-025210	Bdiv_human
Bdiv_009020c	1.6312e-53	1.48415	0.272	0.049	3.39941e-50	SM	Bdiv-009020c	Bdiv_human
Bdiv_004990	2.03316e-53	1.75893	0.22	0.028	4.23711e-50	SM	Bdiv-004990	Bdiv_human
Bdiv_015570	5.7727e-53	1.31354	0.538	0.206	1.20303e-49	SM	Bdiv-015570	Bdiv_human
Bdiv_017040	1.13138e-51	1.57081	0.338	0.085	2.3578e-48	SM	Bdiv-017040	Bdiv_human
Bdiv_031750	3.14069e-51	1.34198	0.413	0.126	6.5452e-48	SM	Bdiv-031750	Bdiv_human
Bdiv_004240	3.64061e-51	1.56598	0.236	0.036	7.58702e-48	SM	Bdiv-004240	Bdiv_human
Bdiv_035920	3.6494e-51	1.72177	0.187	0.018	7.60535e-48	SM	Bdiv-035920	Bdiv_human
Bdiv_018820c	2.14541e-49	1.42701	0.246	0.041	4.47104e-46	SM	Bdiv-018820c	Bdiv_human
Bdiv_006420	2.35681e-49	1.3971	0.257	0.046	4.9116e-46	SM	Bdiv-006420	Bdiv_human
Bdiv_003260	1.71912e-48	1.56644	0.333	0.089	3.58264e-45	SM	Bdiv-003260	Bdiv_human
Bdiv_033660	2.42849e-48	1.26523	0.349	0.092	5.06096e-45	SM	Bdiv-033660	Bdiv_human
Bdiv_022680	7.49525e-48	1.26552	0.375	0.109	1.56201e-44	SM	Bdiv-022680	Bdiv_human
Bdiv_005270	1.03461e-46	1.40733	0.274	0.058	2.15613e-43	SM	Bdiv-005270	Bdiv_human
Bdiv_007750c	1.8538e-46	1.41245	0.315	0.081	3.86332e-43	SM	Bdiv-007750c	Bdiv_human
Bdiv_028100	2.09704e-46	1.21052	0.369	0.107	4.37023e-43	SM	Bdiv-028100	Bdiv_human
Bdiv_011580c	3.37554e-46	1.42848	0.221	0.036	7.03462e-43	SM	Bdiv-011580c	Bdiv_human
Bdiv_003840c	1.42184e-45	1.40657	0.336	0.094	2.96312e-42	SM	Bdiv-003840c	Bdiv_human
Bdiv_037140	1.55111e-45	1.38711	0.295	0.07	3.23251e-42	SM	Bdiv-037140	Bdiv_human
Bdiv_036290	1.67297e-45	1.29288	0.425	0.146	3.48647e-42	SM	Bdiv-036290	Bdiv_human
Bdiv_011270c	2.7363e-45	1.30999	0.249	0.047	5.70245e-42	SM	Bdiv-011270c	Bdiv_human
Bdiv_025230	6.80624e-45	1.25555	0.397	0.129	1.41842e-41	SM	Bdiv-025230	Bdiv_human
Bdiv_032110c	1.21737e-44	1.41649	0.223	0.039	2.537e-41	SM	Bdiv-032110c	Bdiv_human
Bdiv_000390c	2.03185e-44	1.56731	0.195	0.028	4.23437e-41	SM	Bdiv-000390c	Bdiv_human
Bdiv_033020	6.51398e-44	1.46133	0.187	0.025	1.35751e-40	SM	Bdiv-033020	Bdiv_human
Bdiv_034470c	1.40812e-43	1.36876	0.284	0.069	2.93453e-40	SM	Bdiv-034470c	Bdiv_human
Bdiv_034330c	1.42747e-43	1.60774	0.321	0.093	2.97486e-40	SM	Bdiv-034330c	Bdiv_human
Bdiv_036170c	2.15128e-43	1.21947	0.379	0.121	4.48327e-40	SM	Bdiv-036170c	Bdiv_human
Bdiv_008700c	4.07861e-43	1.439	0.213	0.036	8.49982e-40	SM	Bdiv-008700c	Bdiv_human
Bdiv_010660	7.46426e-43	1.3809	0.161	0.016	1.55555e-39	SM	Bdiv-010660	Bdiv_human
Bdiv_028700	1.30195e-42	1.36557	0.272	0.064	2.71327e-39	SM	Bdiv-028700	Bdiv_human
Bdiv_036720c	8.95403e-42	1.45464	0.243	0.052	1.86602e-38	SM	Bdiv-036720c	Bdiv_human
Bdiv_002620	1.17434e-41	1.33738	0.174	0.022	2.44733e-38	SM	Bdiv-002620	Bdiv_human
Bdiv_035230	3.64717e-41	1.40958	0.12	0.005	7.60071e-38	SM	Bdiv-035230	Bdiv_human
Bdiv_009740	4.72763e-41	1.33042	0.205	0.035	9.85238e-38	SM	Bdiv-009740	Bdiv_human
Bdiv_023540	4.95741e-41	1.41103	0.161	0.018	1.03313e-37	SM	Bdiv-023540	Bdiv_human
Bdiv_039120	4.96861e-41	1.34466	0.279	0.071	1.03546e-37	SM	Bdiv-039120	Bdiv_human
Bdiv_023560c	8.95283e-41	1.39786	0.162	0.019	1.86577e-37	SM	Bdiv-023560c	Bdiv_human
Bdiv_040080	1.3349e-40	1.20611	0.369	0.12	2.78193e-37	SM	Bdiv-040080	Bdiv_human
Bdiv_016660c	1.44079e-40	1.24164	0.233	0.047	3.00262e-37	SM	Bdiv-016660c	Bdiv_human
Bdiv_026900	1.52647e-40	1.30074	0.185	0.027	3.18115e-37	SM	Bdiv-026900	Bdiv_human
Bdiv_002640	1.61433e-40	1.14257	0.464	0.182	3.36426e-37	SM	Bdiv-002640	Bdiv_human
Bdiv_035450	2.89106e-40	1.27091	0.316	0.092	6.02497e-37	SM	Bdiv-035450	Bdiv_human
Bdiv_019270	5.42938e-40	1.11703	0.57	0.283	1.13148e-36	SM	Bdiv-019270	Bdiv_human
Bdiv_021000c	9.31621e-40	1.30163	0.17	0.022	1.9415e-36	SM	Bdiv-021000c	Bdiv_human
Bdiv_024440c	1.69926e-39	1.10322	0.485	0.206	3.54125e-36	SM	Bdiv-024440c	Bdiv_human
Bdiv_038390	1.74549e-39	1.07906	0.457	0.184	3.6376e-36	SM	Bdiv-038390	Bdiv_human
Bdiv_039470	1.78995e-39	1.33892	0.121	0.007	3.73025e-36	SM	Bdiv-039470	Bdiv_human
Bdiv_037690c	1.94023e-39	1.35143	0.282	0.075	4.04343e-36	SM	Bdiv-037690c	Bdiv_human
Bdiv_003940	5.22594e-39	1.43473	0.221	0.046	1.08909e-35	SM	Bdiv-003940	Bdiv_human
Bdiv_039600	5.38602e-39	1.22082	0.125	0.008	1.12245e-35	SM	Bdiv-039600	Bdiv_human
Bdiv_023430c	1.78569e-38	1.38178	0.221	0.046	3.72138e-35	SM	Bdiv-023430c	Bdiv_human
Bdiv_030950c	2.43172e-38	1.39114	0.192	0.033	5.0677e-35	SM	Bdiv-030950c	Bdiv_human
Bdiv_008910	2.92338e-38	1.30043	0.164	0.022	6.09231e-35	SM	Bdiv-008910	Bdiv_human
Bdiv_024680	6.80142e-38	1.32833	0.159	0.02	1.41741e-34	SM	Bdiv-024680	Bdiv_human
Bdiv_011090c	1.3605e-37	1.14043	0.348	0.115	2.83529e-34	SM	Bdiv-011090c	Bdiv_human
Bdiv_021830	1.49407e-37	1.33791	0.195	0.035	3.11364e-34	SM	Bdiv-021830	Bdiv_human
Bdiv_001220	5.1493e-37	1.14987	0.344	0.113	1.07311e-33	SM	Bdiv-001220	Bdiv_human
Bdiv_010170c	5.62302e-37	1.48872	0.159	0.021	1.17184e-33	SM	Bdiv-010170c	Bdiv_human
Bdiv_025380c	5.64274e-37	1.14452	0.433	0.172	1.17595e-33	SM	Bdiv-025380c	Bdiv_human
Bdiv_005930c	6.23772e-37	1.37935	0.164	0.023	1.29994e-33	SM	Bdiv-005930c	Bdiv_human
Bdiv_015170	6.55699e-37	1.13662	0.361	0.124	1.36648e-33	SM	Bdiv-015170	Bdiv_human
Bdiv_002540c	9.67318e-37	1.10582	0.382	0.137	2.01589e-33	SM	Bdiv-002540c	Bdiv_human
Bdiv_015260c	1.056e-36	1.34063	0.164	0.023	2.20071e-33	SM	Bdiv-015260c	Bdiv_human
Bdiv_040430c	4.29605e-36	1.06942	0.495	0.228	8.95297e-33	SM	Bdiv-040430c	Bdiv_human
Bdiv_002920	4.97046e-36	1.25199	0.32	0.104	1.03584e-32	SM	Bdiv-002920	Bdiv_human
Bdiv_035860	1.52763e-35	1.06436	0.446	0.189	3.18359e-32	SM	Bdiv-035860	Bdiv_human
Bdiv_040590c	4.78539e-35	1.31786	0.138	0.016	9.97276e-32	SM	Bdiv-040590c	Bdiv_human
Bdiv_025390	5.43868e-35	1.27282	0.298	0.092	1.13342e-31	SM	Bdiv-025390	Bdiv_human
Bdiv_009820c	7.29969e-35	1.25315	0.261	0.072	1.52126e-31	SM	Bdiv-009820c	Bdiv_human
Bdiv_037510c	8.03963e-35	1.30034	0.151	0.021	1.67546e-31	SM	Bdiv-037510c	Bdiv_human
Bdiv_023260c	2.11332e-34	1.31107	0.185	0.035	4.40416e-31	SM	Bdiv-023260c	Bdiv_human
Bdiv_002330	2.66958e-34	1.21255	0.262	0.073	5.5634e-31	SM	Bdiv-002330	Bdiv_human
Bdiv_028050c	3.04068e-34	1.20253	0.12	0.01	6.33677e-31	SM	Bdiv-028050c	Bdiv_human
Bdiv_008540	4.23734e-34	1.34031	0.162	0.026	8.83061e-31	SM	Bdiv-008540	Bdiv_human
Bdiv_030820c	9.43036e-34	1.26135	0.205	0.045	1.96529e-30	SM	Bdiv-030820c	Bdiv_human
Bdiv_038140c	1.09669e-33	1.15993	0.292	0.092	2.28551e-30	SM	Bdiv-038140c	Bdiv_human
Bdiv_003680c	3.27814e-33	1.21026	0.241	0.064	6.83164e-30	SM	Bdiv-003680c	Bdiv_human
Bdiv_027100c	3.97558e-33	1.14567	0.113	0.009	8.28512e-30	SM	Bdiv-027100c	Bdiv_human
Bdiv_031060c	4.25059e-32	1.08703	0.249	0.069	8.85823e-29	SM	Bdiv-031060c	Bdiv_human
Bdiv_018140c	4.78561e-32	1.02673	0.259	0.074	9.9732e-29	SM	Bdiv-018140c	Bdiv_human
Bdiv_030710c	6.9009e-32	1.20661	0.09	0.003	1.43815e-28	SM	Bdiv-030710c	Bdiv_human
Bdiv_035930	1.07373e-31	1.02197	0.346	0.128	2.23765e-28	SM	Bdiv-035930	Bdiv_human
Bdiv_007630	1.4772e-31	1.2121	0.136	0.018	3.07848e-28	SM	Bdiv-007630	Bdiv_human
Bdiv_039890c	2.54624e-31	1.14508	0.289	0.096	5.30637e-28	SM	Bdiv-039890c	Bdiv_human
Bdiv_001880c	3.53156e-31	1.30909	0.18	0.037	7.35977e-28	SM	Bdiv-001880c	Bdiv_human
Bdiv_038660	3.64248e-31	1.23843	0.27	0.084	7.59093e-28	SM	Bdiv-038660	Bdiv_human
Bdiv_039610c	3.75741e-31	1.10372	0.133	0.017	7.83044e-28	SM	Bdiv-039610c	Bdiv_human
Bdiv_037750	2.44081e-30	1.22556	0.113	0.011	5.08665e-27	SM	Bdiv-037750	Bdiv_human
Bdiv_014890c	5.92159e-30	1.14322	0.148	0.025	1.23406e-26	SM	Bdiv-014890c	Bdiv_human
Bdiv_038530	1.04566e-29	1.0775	0.075	0.001	2.17915e-26	SM	Bdiv-038530	Bdiv_human
Bdiv_009300c	1.29014e-29	1.19964	0.13	0.018	2.68865e-26	SM	Bdiv-009300c	Bdiv_human
Bdiv_015020c	1.29482e-29	1.08342	0.125	0.016	2.6984e-26	SM	Bdiv-015020c	Bdiv_human
Bdiv_038050	1.51478e-29	1.17551	0.152	0.027	3.1568e-26	SM	Bdiv-038050	Bdiv_human
Bdiv_026980	3.2355e-29	1.10795	0.187	0.043	6.74278e-26	SM	Bdiv-026980	Bdiv_human
Bdiv_037820	4.94329e-29	1.28394	0.141	0.023	1.03018e-25	SM	Bdiv-037820	Bdiv_human
Bdiv_022910c	6.17691e-29	1.09235	0.164	0.032	1.28727e-25	SM	Bdiv-022910c	Bdiv_human
Bdiv_030160	7.3625e-29	1.0649	0.134	0.021	1.53434e-25	SM	Bdiv-030160	Bdiv_human
Bdiv_001800c	8.12157e-29	1.04299	0.274	0.091	1.69254e-25	SM	Bdiv-001800c	Bdiv_human
Bdiv_025290c	4.49026e-28	1.07366	0.246	0.076	9.35771e-25	SM	Bdiv-025290c	Bdiv_human
Bdiv_010970	4.70359e-28	1.03742	0.105	0.011	9.80228e-25	SM	Bdiv-010970	Bdiv_human
Bdiv_011800	5.54253e-28	1.11746	0.18	0.041	1.15506e-24	SM	Bdiv-011800	Bdiv_human
Bdiv_037330	5.65624e-28	1.10625	0.146	0.026	1.17876e-24	SM	Bdiv-037330	Bdiv_human
Bdiv_022960c	6.63838e-28	1.18886	0.157	0.032	1.38344e-24	SM	Bdiv-022960c	Bdiv_human
Bdiv_034990	6.79363e-28	1.25465	0.138	0.023	1.41579e-24	SM	Bdiv-034990	Bdiv_human
Bdiv_010020c	8.91907e-28	1.01944	0.151	0.028	1.85873e-24	SM	Bdiv-010020c	Bdiv_human
Bdiv_013950	2.63115e-27	1.18914	0.175	0.041	5.48332e-24	SM	Bdiv-013950	Bdiv_human
Bdiv_032810c	3.70888e-27	1.04039	0.169	0.037	7.72931e-24	SM	Bdiv-032810c	Bdiv_human
Bdiv_022920c	6.67303e-27	1.15843	0.152	0.031	1.39066e-23	SM	Bdiv-022920c	Bdiv_human
Bdiv_015890	6.82057e-27	1.15577	0.139	0.025	1.42141e-23	SM	Bdiv-015890	Bdiv_human
Bdiv_019430	9.58275e-27	1.07726	0.133	0.022	1.99705e-23	SM	Bdiv-019430	Bdiv_human
Bdiv_035680	1.51208e-26	1.16366	0.123	0.019	3.15117e-23	SM	Bdiv-035680	Bdiv_human
Bdiv_016950c	1.95546e-26	1.08188	0.162	0.036	4.07518e-23	SM	Bdiv-016950c	Bdiv_human
Bdiv_010800c	2.01216e-26	1.15639	0.131	0.022	4.19334e-23	SM	Bdiv-010800c	Bdiv_human
Bdiv_002070	6.77839e-26	1.13597	0.174	0.042	1.41262e-22	SM	Bdiv-002070	Bdiv_human
Bdiv_017750c	7.96091e-26	1.10331	0.161	0.036	1.65905e-22	SM	Bdiv-017750c	Bdiv_human
Bdiv_023290c	8.58226e-26	1.15275	0.148	0.03	1.78854e-22	SM	Bdiv-023290c	Bdiv_human
Bdiv_029690c	1.05796e-25	1.16354	0.128	0.022	2.2048e-22	SM	Bdiv-029690c	Bdiv_human
Bdiv_020650	1.09891e-25	1.06783	0.195	0.053	2.29013e-22	SM	Bdiv-020650	Bdiv_human
Bdiv_039580c	1.39867e-25	1.00578	0.093	0.009	2.91482e-22	SM	Bdiv-039580c	Bdiv_human
Bdiv_005900	1.4372e-25	1.08933	0.128	0.022	2.99513e-22	SM	Bdiv-005900	Bdiv_human
Bdiv_036090	2.13797e-25	1.03296	0.126	0.021	4.45554e-22	SM	Bdiv-036090	Bdiv_human
Bdiv_004450	4.07793e-25	1.14552	0.116	0.018	8.4984e-22	SM	Bdiv-004450	Bdiv_human
Bdiv_033130	4.18703e-25	1.0817	0.113	0.017	8.72576e-22	SM	Bdiv-033130	Bdiv_human
Bdiv_039800	1.46133e-24	1.00862	0.115	0.018	3.04541e-21	SM	Bdiv-039800	Bdiv_human
Bdiv_010130	5.16002e-24	1.12878	0.126	0.023	1.07535e-20	SM	Bdiv-010130	Bdiv_human
Bdiv_035130	9.87207e-24	1.04291	0.149	0.034	2.05734e-20	SM	Bdiv-035130	Bdiv_human
Bdiv_019160	3.65534e-23	1.11255	0.197	0.06	7.61772e-20	SM	Bdiv-019160	Bdiv_human
Bdiv_014830c	7.80417e-23	1.09927	0.13	0.026	1.62639e-19	SM	Bdiv-014830c	Bdiv_human
Bdiv_013430c	1.26588e-22	1.12967	0.111	0.019	2.6381e-19	SM	Bdiv-013430c	Bdiv_human
Bdiv_038990c	2.10924e-22	1.06584	0.138	0.031	4.39566e-19	SM	Bdiv-038990c	Bdiv_human
Bdiv_011470c	5.23346e-22	1.01073	0.152	0.039	1.09065e-18	SM	Bdiv-011470c	Bdiv_human
Bdiv_001830	4.01156e-21	1.05348	0.108	0.02	8.36009e-18	SM	Bdiv-001830	Bdiv_human
Bdiv_033030c	4.82168e-21	1.043	0.139	0.034	1.00484e-17	SM	Bdiv-033030c	Bdiv_human
Bdiv_016020	2.74388e-19	1.00835	0.133	0.034	5.71825e-16	SM	Bdiv-016020	Bdiv_human
Bdiv_005660	2.26287e-16	1.00954	0.097	0.021	4.71583e-13	SM	Bdiv-005660	Bdiv_human
Bdiv_002680c	1.54616e-83	2.60875	0.813	0.247	3.22219e-80	MC	Bdiv-002680c	Bdiv_human
Bdiv_040360	9.12807e-80	2.42811	0.72	0.165	1.90229e-76	MC	Bdiv-040360	Bdiv_human
Bdiv_006100	6.7991e-73	1.93029	0.967	0.526	1.41693e-69	MC	Bdiv-006100	Bdiv_human
Bdiv_012980	8.53807e-70	1.86662	0.973	0.459	1.77933e-66	MC	Bdiv-012980	Bdiv_human
Bdiv_037960	1.61661e-67	2.2614	0.709	0.179	3.36901e-64	MC	Bdiv-037960	Bdiv_human
Bdiv_031730c	3.00947e-67	1.74365	0.978	0.717	6.27173e-64	MC	Bdiv-031730c	Bdiv_human
Bdiv_004940c	1.95638e-66	2.44364	0.665	0.174	4.0771e-63	MC	Bdiv-004940c	Bdiv_human
Bdiv_004410c	7.74323e-66	1.40335	0.989	0.85	1.61369e-62	MC	Bdiv-004410c	Bdiv_human
Bdiv_038160c	7.97586e-62	2.33294	0.648	0.179	1.66217e-58	MC	Bdiv-038160c	Bdiv_human
Bdiv_032630c	1.28542e-59	1.70469	0.929	0.422	2.67881e-56	MC	Bdiv-032630c	Bdiv_human
Bdiv_005010c	1.46142e-52	1.47806	0.94	0.5	3.0456e-49	MC	Bdiv-005010c	Bdiv_human
Bdiv_002420	1.61648e-52	1.40645	0.956	0.52	3.36874e-49	MC	Bdiv-002420	Bdiv_human
Bdiv_031200c	1.13946e-49	2.19309	0.56	0.153	2.37463e-46	MC	Bdiv-031200c	Bdiv_human
Bdiv_020490	6.81864e-49	1.5565	0.863	0.369	1.421e-45	MC	Bdiv-020490	Bdiv_human
Bdiv_024370c	9.44342e-49	1.84018	0.714	0.243	1.96801e-45	MC	Bdiv-024370c	Bdiv_human
Bdiv_010140c	1.58946e-48	1.49904	0.901	0.412	3.31243e-45	MC	Bdiv-010140c	Bdiv_human
Bdiv_001220	9.37696e-48	2.09753	0.533	0.142	1.95416e-44	MC	Bdiv-001220	Bdiv_human
Bdiv_039980c	4.28659e-46	1.65066	0.797	0.334	8.93326e-43	MC	Bdiv-039980c	Bdiv_human
Bdiv_000810	6.78005e-46	2.03666	0.56	0.163	1.41296e-42	MC	Bdiv-000810	Bdiv_human
Bdiv_015820c	1.63517e-44	1.89456	0.599	0.183	3.4077e-41	MC	Bdiv-015820c	Bdiv_human
Bdiv_037800c	5.74453e-43	1.94421	0.659	0.259	1.19716e-39	MC	Bdiv-037800c	Bdiv_human
Bdiv_000370c	1.87107e-41	1.93031	0.5	0.13	3.89931e-38	MC	Bdiv-000370c	Bdiv_human
Bdiv_023730	5.92801e-38	1.43853	0.769	0.364	1.2354e-34	MC	Bdiv-023730	Bdiv_human
Bdiv_030430c	3.48412e-36	1.70579	0.571	0.203	7.26091e-33	MC	Bdiv-030430c	Bdiv_human
Bdiv_017800	5.70715e-36	1.73447	0.604	0.239	1.18937e-32	MC	Bdiv-017800	Bdiv_human
Bdiv_028100	2.31732e-35	1.92997	0.484	0.148	4.82929e-32	MC	Bdiv-028100	Bdiv_human
Bdiv_016310c	1.66042e-34	1.13727	0.857	0.416	3.46031e-31	MC	Bdiv-016310c	Bdiv_human
Bdiv_038320	2.39896e-34	1.27759	0.813	0.45	4.99944e-31	MC	Bdiv-038320	Bdiv_human
Bdiv_011800	3.16628e-34	2.15525	0.302	0.058	6.59853e-31	MC	Bdiv-011800	Bdiv_human
Bdiv_019460c	5.47452e-34	1.80267	0.599	0.247	1.14089e-30	MC	Bdiv-019460c	Bdiv_human
Bdiv_037780	6.32522e-34	1.64506	0.626	0.254	1.31818e-30	MC	Bdiv-037780	Bdiv_human
Bdiv_025310	1.40148e-33	1.80991	0.423	0.111	2.92068e-30	MC	Bdiv-025310	Bdiv_human
Bdiv_014590c	6.04416e-33	1.30509	0.819	0.482	1.2596e-29	MC	Bdiv-014590c	Bdiv_human
Bdiv_020970	2.54728e-31	1.56676	0.659	0.307	5.30853e-28	MC	Bdiv-020970	Bdiv_human
Bdiv_036290	1.22748e-29	1.63855	0.516	0.192	2.55808e-26	MC	Bdiv-036290	Bdiv_human
Bdiv_000940c	2.77313e-29	1.75077	0.396	0.112	5.7792e-26	MC	Bdiv-000940c	Bdiv_human
Bdiv_027570c	4.52806e-29	1.68945	0.538	0.212	9.43647e-26	MC	Bdiv-027570c	Bdiv_human
Bdiv_027890	8.26525e-27	1.23394	0.764	0.497	1.72248e-23	MC	Bdiv-027890	Bdiv_human
Bdiv_039410c	9.13983e-24	1.9083	0.269	0.064	1.90474e-20	MC	Bdiv-039410c	Bdiv_human
Bdiv_030420c	1.41752e-23	1.78871	0.407	0.142	2.9541e-20	MC	Bdiv-030420c	Bdiv_human
Bdiv_018420c	1.76787e-23	1.66811	0.434	0.165	3.68424e-20	MC	Bdiv-018420c	Bdiv_human
Bdiv_022340	5.49633e-23	1.086	0.632	0.294	1.14544e-19	MC	Bdiv-022340	Bdiv_human
Bdiv_030890	2.91547e-22	1.76186	0.313	0.091	6.07583e-19	MC	Bdiv-030890	Bdiv_human
Bdiv_005460c	4.54072e-22	1.05836	0.758	0.506	9.46285e-19	MC	Bdiv-005460c	Bdiv_human
Bdiv_016060	2.5229e-20	1.55838	0.286	0.081	5.25773e-17	MC	Bdiv-016060	Bdiv_human
Bdiv_034910c	2.43381e-19	1.55913	0.258	0.07	5.07205e-16	MC	Bdiv-034910c	Bdiv_human
Bdiv_017300	2.50893e-18	1.72235	0.253	0.072	5.22861e-15	MC	Bdiv-017300	Bdiv_human
Bdiv_002460	1.04492e-17	1.01671	0.731	0.523	2.17762e-14	MC	Bdiv-002460	Bdiv_human
Bdiv_011270c	1.75703e-17	1.75739	0.269	0.085	3.66166e-14	MC	Bdiv-011270c	Bdiv_human
Bdiv_020190c	6.02725e-17	1.43596	0.418	0.187	1.25608e-13	MC	Bdiv-020190c	Bdiv_human
Bdiv_020690	1.06504e-16	1.28862	0.566	0.348	2.21953e-13	MC	Bdiv-020690	Bdiv_human
Bdiv_028170c	2.5479e-16	1.22841	0.516	0.276	5.30983e-13	MC	Bdiv-028170c	Bdiv_human
Bdiv_006110	4.7984e-16	1.01315	0.698	0.49	9.99987e-13	MC	Bdiv-006110	Bdiv_human
Bdiv_027330	6.65887e-16	1.30371	0.379	0.157	1.38771e-12	MC	Bdiv-027330	Bdiv_human
Bdiv_005540	1.12489e-15	1.08379	0.533	0.281	2.34426e-12	MC	Bdiv-005540	Bdiv_human
Bdiv_037760	1.49911e-15	1.54368	0.324	0.127	3.12415e-12	MC	Bdiv-037760	Bdiv_human
Bdiv_000820	1.69078e-15	1.37649	0.379	0.165	3.52359e-12	MC	Bdiv-000820	Bdiv_human
Bdiv_023260c	4.10686e-15	1.50575	0.214	0.061	8.5587e-12	MC	Bdiv-023260c	Bdiv_human
Bdiv_022850c	1.82612e-14	1.00903	0.67	0.49	3.80563e-11	MC	Bdiv-022850c	Bdiv_human
Bdiv_015030	2.84098e-14	1.50798	0.247	0.082	5.92061e-11	MC	Bdiv-015030	Bdiv_human
Bdiv_002510c	7.93722e-14	1.29698	0.418	0.206	1.65412e-10	MC	Bdiv-002510c	Bdiv_human
Bdiv_014940	2.60759e-13	1.38618	0.407	0.209	5.43421e-10	MC	Bdiv-014940	Bdiv_human
Bdiv_038660	1.56019e-12	1.19483	0.297	0.118	3.25144e-09	MC	Bdiv-038660	Bdiv_human
Bdiv_020020c	5.78456e-12	1.17995	0.418	0.225	1.2055e-08	MC	Bdiv-020020c	Bdiv_human
Bdiv_011550	7.02666e-12	1.25733	0.088	0.014	1.46436e-08	MC	Bdiv-011550	Bdiv_human
Bdiv_020980c	7.92623e-12	1.0388	0.5	0.299	1.65183e-08	MC	Bdiv-020980c	Bdiv_human
Bdiv_017400c	1.10526e-11	1.25484	0.429	0.244	2.30336e-08	MC	Bdiv-017400c	Bdiv_human
Bdiv_020680c	1.69784e-11	1.06034	0.61	0.459	3.5383e-08	MC	Bdiv-020680c	Bdiv_human
Bdiv_005370c	1.7422e-11	1.13661	0.407	0.212	3.63074e-08	MC	Bdiv-005370c	Bdiv_human
Bdiv_031210	1.7477e-11	1.16708	0.451	0.263	3.64221e-08	MC	Bdiv-031210	Bdiv_human
Bdiv_017140	4.49597e-11	1.16821	0.324	0.15	9.36961e-08	MC	Bdiv-017140	Bdiv_human
Bdiv_029480c	6.74117e-11	1.41235	0.286	0.125	1.40486e-07	MC	Bdiv-029480c	Bdiv_human
Bdiv_016990c	7.33808e-11	1.34091	0.291	0.13	1.52926e-07	MC	Bdiv-016990c	Bdiv_human
Bdiv_001620c	1.41649e-10	1.10896	0.363	0.179	2.95197e-07	MC	Bdiv-001620c	Bdiv_human
Bdiv_019630	2.42319e-10	1.2729	0.264	0.112	5.04992e-07	MC	Bdiv-019630	Bdiv_human
Bdiv_014470c	3.10854e-10	1.26029	0.286	0.131	6.47819e-07	MC	Bdiv-014470c	Bdiv_human
Bdiv_010170c	1.24686e-09	1.25204	0.154	0.048	2.59845e-06	MC	Bdiv-010170c	Bdiv_human
Bdiv_011700c	1.71548e-09	1.37588	0.148	0.046	3.57506e-06	MC	Bdiv-011700c	Bdiv_human
Bdiv_015020c	4.33587e-09	1.45305	0.126	0.037	9.03595e-06	MC	Bdiv-015020c	Bdiv_human
Bdiv_011790c	5.63767e-09	1.18467	0.154	0.05	1.17489e-05	MC	Bdiv-011790c	Bdiv_human
Bdiv_035340c	8.11205e-09	1.14657	0.247	0.11	1.69055e-05	MC	Bdiv-035340c	Bdiv_human
Bdiv_009690c	1.16481e-08	1.01066	0.429	0.274	2.42747e-05	MC	Bdiv-009690c	Bdiv_human
Bdiv_038490	1.43911e-08	1.04189	0.346	0.189	2.99911e-05	MC	Bdiv-038490	Bdiv_human
Bdiv_018790	1.86312e-08	1.10644	0.192	0.075	3.88274e-05	MC	Bdiv-018790	Bdiv_human
Bdiv_009450	2.2614e-08	1.1432	0.308	0.161	4.71276e-05	MC	Bdiv-009450	Bdiv_human
Bdiv_018820c	2.41201e-08	1.24971	0.203	0.084	5.02664e-05	MC	Bdiv-018820c	Bdiv_human
Bdiv_001530c	3.85723e-08	1.27025	0.143	0.049	8.03847e-05	MC	Bdiv-001530c	Bdiv_human
Bdiv_016280	6.84742e-08	1.18829	0.352	0.215	0.0001427	MC	Bdiv-016280	Bdiv_human
Bdiv_029910c	1.86392e-07	1.00816	0.44	0.296	0.00038844	MC	Bdiv-029910c	Bdiv_human
Bdiv_022680	2.61593e-07	1.12174	0.297	0.167	0.00054516	MC	Bdiv-022680	Bdiv_human
Bdiv_011090c	2.8972e-07	1.19489	0.291	0.165	0.000603776	MC	Bdiv-011090c	Bdiv_human
Bdiv_040500	3.6996e-07	1.05576	0.297	0.164	0.000770997	MC	Bdiv-040500	Bdiv_human
Bdiv_023430c	7.1744e-07	1.18161	0.187	0.083	0.00149515	MC	Bdiv-023430c	Bdiv_human
Bdiv_029800c	9.38646e-07	1.12968	0.093	0.028	0.00195614	MC	Bdiv-029800c	Bdiv_human
Bdiv_013260	1.34809e-06	1.16909	0.143	0.056	0.00280942	MC	Bdiv-013260	Bdiv_human
Bdiv_000580c	1.98273e-06	1.14585	0.137	0.054	0.004132	MC	Bdiv-000580c	Bdiv_human
Bdiv_004730	2.05692e-06	1.11424	0.214	0.108	0.00428663	MC	Bdiv-004730	Bdiv_human
Bdiv_024520	1.48288e-229	3.06105	0.718	0.094	3.09033e-226	G	Bdiv-024520	Bdiv_human
Bdiv_031540	7.80908e-222	1.52682	0.995	0.729	1.62741e-218	G	Bdiv-031540	Bdiv_human
Bdiv_039290c	4.82479e-156	2.14759	0.733	0.215	1.00549e-152	G	Bdiv-039290c	Bdiv_human
Bdiv_037120c	4.67239e-149	1.86359	0.824	0.317	9.73726e-146	G	Bdiv-037120c	Bdiv_human
Bdiv_023320c	1.09675e-148	2.60013	0.53	0.072	2.28563e-145	G	Bdiv-023320c	Bdiv_human
Bdiv_030940	8.10492e-129	2.41908	0.489	0.072	1.68906e-125	G	Bdiv-030940	Bdiv_human
Bdiv_005620c	1.10593e-121	2.54182	0.417	0.043	2.30477e-118	G	Bdiv-005620c	Bdiv_human
Bdiv_029570	1.93281e-120	1.53226	0.809	0.339	4.02798e-117	G	Bdiv-029570	Bdiv_human
Bdiv_025470	5.32679e-116	1.16007	0.939	0.656	1.1101e-112	G	Bdiv-025470	Bdiv_human
Bdiv_010550	2.53656e-114	1.83952	0.671	0.221	5.28618e-111	G	Bdiv-010550	Bdiv_human
Bdiv_028150c	4.55855e-113	1.00389	0.97	0.674	9.50002e-110	G	Bdiv-028150c	Bdiv_human
Bdiv_024560c	2.14852e-103	1.27207	0.856	0.482	4.47751e-100	G	Bdiv-024560c	Bdiv_human
Bdiv_030120c	4.83463e-86	1.77874	0.489	0.127	1.00754e-82	G	Bdiv-030120c	Bdiv_human
Bdiv_001970c	9.27277e-84	2.15193	0.337	0.048	1.93245e-80	G	Bdiv-001970c	Bdiv_human
Bdiv_030780	1.36211e-83	1.14944	0.825	0.47	2.83863e-80	G	Bdiv-030780	Bdiv_human
Bdiv_040270c	9.27269e-82	1.77321	0.478	0.129	1.93243e-78	G	Bdiv-040270c	Bdiv_human
Bdiv_001400c	5.97623e-79	1.17996	0.791	0.444	1.24545e-75	G	Bdiv-001400c	Bdiv_human
Bdiv_002810c	2.1232e-76	1.73443	0.439	0.113	4.42476e-73	G	Bdiv-002810c	Bdiv_human
Bdiv_031010c	8.49063e-75	2.00344	0.389	0.086	1.76945e-71	G	Bdiv-031010c	Bdiv_human
Bdiv_036490c	5.07088e-74	1.91863	0.366	0.076	1.05677e-70	G	Bdiv-036490c	Bdiv_human
Bdiv_010040	1.81334e-72	1.55091	0.525	0.18	3.779e-69	G	Bdiv-010040	Bdiv_human
Bdiv_028820c	7.23086e-66	1.9116	0.288	0.046	1.50691e-62	G	Bdiv-028820c	Bdiv_human
Bdiv_010500	8.04352e-66	1.97772	0.244	0.025	1.67627e-62	G	Bdiv-010500	Bdiv_human
Bdiv_016410c	2.89781e-63	1.17202	0.637	0.288	6.03903e-60	G	Bdiv-016410c	Bdiv_human
Bdiv_019270	4.72488e-63	1.0974	0.603	0.231	9.84664e-60	G	Bdiv-019270	Bdiv_human
Bdiv_036280c	7.2764e-63	1.85219	0.29	0.048	1.5164e-59	G	Bdiv-036280c	Bdiv_human
Bdiv_026870	1.05206e-61	1.99076	0.276	0.046	2.19249e-58	G	Bdiv-026870	Bdiv_human
Bdiv_014220	1.13289e-61	1.98172	0.275	0.045	2.36095e-58	G	Bdiv-014220	Bdiv_human
Bdiv_034880	1.11748e-60	1.711	0.324	0.07	2.32883e-57	G	Bdiv-034880	Bdiv_human
Bdiv_029020c	1.64893e-60	1.38379	0.522	0.206	3.43638e-57	G	Bdiv-029020c	Bdiv_human
Bdiv_004360	1.10688e-58	1.57346	0.376	0.102	2.30674e-55	G	Bdiv-004360	Bdiv_human
Bdiv_020930c	5.5679e-58	1.16408	0.575	0.249	1.16035e-54	G	Bdiv-020930c	Bdiv_human
Bdiv_017090c	2.84951e-56	1.36688	0.5	0.2	5.93838e-53	G	Bdiv-017090c	Bdiv_human
Bdiv_023480	7.57023e-56	1.4781	0.425	0.145	1.57764e-52	G	Bdiv-023480	Bdiv_human
Bdiv_029880c	1.1512e-54	1.12956	0.666	0.359	2.39911e-51	G	Bdiv-029880c	Bdiv_human
Bdiv_010750	2.12773e-53	1.5634	0.257	0.045	4.43418e-50	G	Bdiv-010750	Bdiv_human
Bdiv_039850c	4.97499e-52	1.68274	0.23	0.035	1.03679e-48	G	Bdiv-039850c	Bdiv_human
Bdiv_002570c	1.55699e-51	1.38714	0.425	0.153	3.24478e-48	G	Bdiv-002570c	Bdiv_human
Bdiv_005060c	3.29069e-51	1.62622	0.275	0.058	6.85779e-48	G	Bdiv-005060c	Bdiv_human
Bdiv_024470c	1.80406e-50	1.32794	0.382	0.121	3.75965e-47	G	Bdiv-024470c	Bdiv_human
Bdiv_024480	1.1377e-49	1.69107	0.214	0.031	2.37096e-46	G	Bdiv-024480	Bdiv_human
Bdiv_000900	1.33894e-49	1.46131	0.327	0.09	2.79035e-46	G	Bdiv-000900	Bdiv_human
Bdiv_015190	6.27516e-48	1.68923	0.251	0.052	1.30774e-44	G	Bdiv-015190	Bdiv_human
Bdiv_024120c	2.02363e-47	1.4407	0.324	0.092	4.21725e-44	G	Bdiv-024120c	Bdiv_human
Bdiv_038560c	4.98442e-47	1.70574	0.234	0.045	1.03875e-43	G	Bdiv-038560c	Bdiv_human
Bdiv_017740	5.76502e-46	1.71428	0.213	0.036	1.20143e-42	G	Bdiv-017740	Bdiv_human
Bdiv_012780c	8.11938e-45	1.12966	0.464	0.191	1.69208e-41	G	Bdiv-012780c	Bdiv_human
Bdiv_017100	9.94841e-45	1.27626	0.364	0.123	2.07325e-41	G	Bdiv-017100	Bdiv_human
Bdiv_017520c	2.6824e-44	1.26108	0.381	0.136	5.59013e-41	G	Bdiv-017520c	Bdiv_human
Bdiv_034100	3.15938e-44	1.5159	0.282	0.075	6.58415e-41	G	Bdiv-034100	Bdiv_human
Bdiv_002870	1.8356e-42	1.63571	0.223	0.045	3.82539e-39	G	Bdiv-002870	Bdiv_human
Bdiv_015660c	1.26152e-41	1.562	0.238	0.053	2.629e-38	G	Bdiv-015660c	Bdiv_human
Bdiv_009150	2.91837e-41	1.68712	0.182	0.027	6.08188e-38	G	Bdiv-009150	Bdiv_human
Bdiv_033680c	4.19076e-41	1.51121	0.179	0.026	8.73355e-38	G	Bdiv-033680c	Bdiv_human
Bdiv_010580c	1.06877e-40	1.1346	0.521	0.265	2.22731e-37	G	Bdiv-010580c	Bdiv_human
Bdiv_033760	3.36199e-39	1.13168	0.442	0.195	7.00639e-36	G	Bdiv-033760	Bdiv_human
Bdiv_015670	5.47351e-39	1.22698	0.364	0.134	1.14068e-35	G	Bdiv-015670	Bdiv_human
Bdiv_027200	2.44712e-38	1.35344	0.316	0.107	5.0998e-35	G	Bdiv-027200	Bdiv_human
Bdiv_015680	4.61577e-38	1.38931	0.27	0.078	9.61927e-35	G	Bdiv-015680	Bdiv_human
Bdiv_002800c	6.18119e-38	1.54526	0.176	0.028	1.28816e-34	G	Bdiv-002800c	Bdiv_human
Bdiv_010450	8.85617e-38	1.06395	0.468	0.219	1.84563e-34	G	Bdiv-010450	Bdiv_human
Bdiv_036320c	1.00935e-37	1.13909	0.382	0.152	2.10349e-34	G	Bdiv-036320c	Bdiv_human
Bdiv_003120	1.92699e-37	1.40248	0.246	0.066	4.01585e-34	G	Bdiv-003120	Bdiv_human
Bdiv_026940	1.95315e-37	1.40549	0.23	0.057	4.07037e-34	G	Bdiv-026940	Bdiv_human
Bdiv_017260c	3.56277e-37	1.41723	0.274	0.084	7.42481e-34	G	Bdiv-017260c	Bdiv_human
Bdiv_022740	4.20054e-37	1.45757	0.152	0.019	8.75392e-34	G	Bdiv-022740	Bdiv_human
Bdiv_028340c	4.44217e-37	1.32264	0.285	0.09	9.25749e-34	G	Bdiv-028340c	Bdiv_human
Bdiv_017920	9.25453e-37	1.49463	0.176	0.03	1.92864e-33	G	Bdiv-017920	Bdiv_human
Bdiv_034270c	2.04292e-36	1.49514	0.176	0.03	4.25744e-33	G	Bdiv-034270c	Bdiv_human
Bdiv_028230c	1.07229e-35	1.45445	0.204	0.046	2.23465e-32	G	Bdiv-028230c	Bdiv_human
Bdiv_012740c	1.47547e-35	1.10276	0.443	0.208	3.07487e-32	G	Bdiv-012740c	Bdiv_human
Bdiv_035660c	3.64651e-35	1.47422	0.16	0.024	7.59932e-32	G	Bdiv-035660c	Bdiv_human
Bdiv_002000c	5.01559e-35	1.41852	0.177	0.033	1.04525e-31	G	Bdiv-002000c	Bdiv_human
Bdiv_014230c	3.62567e-34	1.26058	0.255	0.076	7.5559e-31	G	Bdiv-014230c	Bdiv_human
Bdiv_021260	1.2283e-33	1.23184	0.287	0.097	2.55977e-30	G	Bdiv-021260	Bdiv_human
Bdiv_036620	1.34648e-33	1.30323	0.233	0.065	2.80607e-30	G	Bdiv-036620	Bdiv_human
Bdiv_006130c	1.80597e-33	1.22139	0.23	0.062	3.76365e-30	G	Bdiv-006130c	Bdiv_human
Bdiv_024860c	2.53505e-33	1.37729	0.155	0.024	5.28304e-30	G	Bdiv-024860c	Bdiv_human
Bdiv_033520c	3.24248e-33	1.06494	0.407	0.184	6.75734e-30	G	Bdiv-033520c	Bdiv_human
Bdiv_036500c	4.45282e-33	1.34468	0.124	0.012	9.27968e-30	G	Bdiv-036500c	Bdiv_human
Bdiv_023550	6.92728e-33	1.30128	0.251	0.079	1.44365e-29	G	Bdiv-023550	Bdiv_human
Bdiv_003820	1.04208e-32	1.36478	0.156	0.026	2.1717e-29	G	Bdiv-003820	Bdiv_human
Bdiv_014120c	1.40202e-32	1.17592	0.301	0.108	2.92181e-29	G	Bdiv-014120c	Bdiv_human
Bdiv_040330	1.95064e-32	1.26139	0.251	0.079	4.06514e-29	G	Bdiv-040330	Bdiv_human
Bdiv_035140	3.21281e-32	1.4617	0.173	0.036	6.69549e-29	G	Bdiv-035140	Bdiv_human
Bdiv_002880	8.26326e-32	1.35273	0.15	0.024	1.72206e-28	G	Bdiv-002880	Bdiv_human
Bdiv_032460	1.91888e-31	1.41872	0.132	0.018	3.99896e-28	G	Bdiv-032460	Bdiv_human
Bdiv_032020	8.1159e-31	1.36955	0.142	0.023	1.69135e-27	G	Bdiv-032020	Bdiv_human
Bdiv_037470	1.86948e-30	1.27971	0.245	0.079	3.896e-27	G	Bdiv-037470	Bdiv_human
Bdiv_032030c	4.9699e-30	1.26286	0.197	0.051	1.03573e-26	G	Bdiv-032030c	Bdiv_human
Bdiv_019800	1.35613e-29	1.19406	0.103	0.008	2.82618e-26	G	Bdiv-019800	Bdiv_human
Bdiv_038630	5.97312e-29	1.17766	0.28	0.105	1.2448e-25	G	Bdiv-038630	Bdiv_human
Bdiv_032840	2.72065e-28	1.23739	0.145	0.026	5.66984e-25	G	Bdiv-032840	Bdiv_human
Bdiv_017200	6.63418e-28	1.19788	0.152	0.031	1.38256e-24	G	Bdiv-017200	Bdiv_human
Bdiv_035410	6.65047e-28	1.31883	0.109	0.012	1.38596e-24	G	Bdiv-035410	Bdiv_human
Bdiv_017910	9.68102e-28	1.1457	0.281	0.109	2.01752e-24	G	Bdiv-017910	Bdiv_human
Bdiv_032440	1.36757e-27	1.13527	0.093	0.006	2.85002e-24	G	Bdiv-032440	Bdiv_human
Bdiv_009140c	1.56799e-27	1.22916	0.139	0.025	3.26768e-24	G	Bdiv-009140c	Bdiv_human
Bdiv_036680c	1.69836e-27	1.25719	0.131	0.022	3.53938e-24	G	Bdiv-036680c	Bdiv_human
Bdiv_034310c	3.5949e-27	1.14024	0.266	0.101	7.49177e-24	G	Bdiv-034310c	Bdiv_human
Bdiv_007650	5.05861e-27	1.24465	0.151	0.032	1.05421e-23	G	Bdiv-007650	Bdiv_human
Bdiv_036190	6.52345e-27	1.08152	0.261	0.097	1.35949e-23	G	Bdiv-036190	Bdiv_human
Bdiv_008310	9.776e-27	1.08042	0.165	0.038	2.03732e-23	G	Bdiv-008310	Bdiv_human
Bdiv_016220	1.07883e-26	1.23704	0.23	0.079	2.24829e-23	G	Bdiv-016220	Bdiv_human
Bdiv_037340c	1.0882e-26	1.18705	0.124	0.019	2.26781e-23	G	Bdiv-037340c	Bdiv_human
Bdiv_023760c	1.58172e-26	1.21662	0.157	0.036	3.29631e-23	G	Bdiv-023760c	Bdiv_human
Bdiv_012710	1.61768e-26	1.21534	0.129	0.022	3.37125e-23	G	Bdiv-012710	Bdiv_human
Bdiv_005870	8.07771e-26	1.17509	0.193	0.057	1.6834e-22	G	Bdiv-005870	Bdiv_human
Bdiv_004070c	8.70374e-26	1.17445	0.181	0.05	1.81386e-22	G	Bdiv-004070c	Bdiv_human
Bdiv_039000c	9.43658e-26	1.12055	0.119	0.018	1.96658e-22	G	Bdiv-039000c	Bdiv_human
Bdiv_021680	9.65979e-26	1.15612	0.178	0.048	2.0131e-22	G	Bdiv-021680	Bdiv_human
Bdiv_035500	1.02431e-25	1.11819	0.234	0.082	2.13466e-22	G	Bdiv-035500	Bdiv_human
Bdiv_009200c	1.07592e-25	1.12039	0.152	0.035	2.24222e-22	G	Bdiv-009200c	Bdiv_human
Bdiv_006190c	1.15994e-25	1.24773	0.12	0.019	2.41731e-22	G	Bdiv-006190c	Bdiv_human
Bdiv_021860c	1.58189e-25	1.28659	0.197	0.06	3.29667e-22	G	Bdiv-021860c	Bdiv_human
Bdiv_002850c	4.7159e-25	1.24984	0.126	0.023	9.82793e-22	G	Bdiv-002850c	Bdiv_human
Bdiv_036390c	5.84226e-25	1.08663	0.109	0.015	1.21753e-21	G	Bdiv-036390c	Bdiv_human
Bdiv_034550	6.15346e-25	1.16119	0.119	0.019	1.28238e-21	G	Bdiv-034550	Bdiv_human
Bdiv_011000	1.09791e-24	1.22756	0.111	0.017	2.28804e-21	G	Bdiv-011000	Bdiv_human
Bdiv_027770c	1.42008e-24	1.19332	0.212	0.072	2.95944e-21	G	Bdiv-027770c	Bdiv_human
Bdiv_005050	1.7806e-24	1.20108	0.125	0.023	3.71077e-21	G	Bdiv-005050	Bdiv_human
Bdiv_034130c	2.94284e-24	1.10921	0.131	0.026	6.13287e-21	G	Bdiv-034130c	Bdiv_human
Bdiv_023090	4.39381e-24	1.02124	0.225	0.079	9.1567e-21	G	Bdiv-023090	Bdiv_human
Bdiv_022810c	5.38052e-24	1.16314	0.151	0.037	1.1213e-20	G	Bdiv-022810c	Bdiv_human
Bdiv_010540c	5.48268e-24	1.01477	0.262	0.106	1.14259e-20	G	Bdiv-010540c	Bdiv_human
Bdiv_027180	2.46152e-23	1.11646	0.118	0.021	5.1298e-20	G	Bdiv-027180	Bdiv_human
Bdiv_006080	3.11644e-23	1.07722	0.165	0.045	6.49466e-20	G	Bdiv-006080	Bdiv_human
Bdiv_004580	4.02548e-23	1.06635	0.189	0.059	8.38909e-20	G	Bdiv-004580	Bdiv_human
Bdiv_000620	4.38703e-23	1.10407	0.199	0.067	9.14257e-20	G	Bdiv-000620	Bdiv_human
Bdiv_025460	5.42489e-23	1.20571	0.113	0.019	1.13055e-19	G	Bdiv-025460	Bdiv_human
Bdiv_033910c	1.09747e-22	1.14202	0.14	0.033	2.28713e-19	G	Bdiv-033910c	Bdiv_human
Bdiv_013840c	1.12802e-22	1.15054	0.142	0.035	2.3508e-19	G	Bdiv-013840c	Bdiv_human
Bdiv_028140	1.131e-22	1.10708	0.088	0.009	2.357e-19	G	Bdiv-028140	Bdiv_human
Bdiv_036310	1.42253e-22	1.12876	0.156	0.042	2.96455e-19	G	Bdiv-036310	Bdiv_human
Bdiv_004660	2.21397e-22	1.15326	0.109	0.019	4.6139e-19	G	Bdiv-004660	Bdiv_human
Bdiv_020530c	2.35163e-22	1.13278	0.118	0.023	4.9008e-19	G	Bdiv-020530c	Bdiv_human
Bdiv_037850	3.22576e-22	1.00063	0.092	0.011	6.72249e-19	G	Bdiv-037850	Bdiv_human
Bdiv_018230	3.62266e-22	1.1563	0.113	0.021	7.54962e-19	G	Bdiv-018230	Bdiv_human
Bdiv_039830c	1.23453e-21	1.03124	0.115	0.023	2.57276e-18	G	Bdiv-039830c	Bdiv_human
Bdiv_021410	1.7486e-21	1.12174	0.202	0.073	3.64409e-18	G	Bdiv-021410	Bdiv_human
Bdiv_030150	2.06585e-21	1.06841	0.119	0.024	4.30523e-18	G	Bdiv-030150	Bdiv_human
Bdiv_039270	4.04409e-21	1.02653	0.171	0.053	8.42788e-18	G	Bdiv-039270	Bdiv_human
Bdiv_034090c	4.49224e-21	1.15881	0.089	0.012	9.36182e-18	G	Bdiv-034090c	Bdiv_human
Bdiv_008590	4.55145e-21	1.13162	0.111	0.022	9.48522e-18	G	Bdiv-008590	Bdiv_human
Bdiv_004600c	5.32061e-21	1.06176	0.157	0.046	1.10881e-17	G	Bdiv-004600c	Bdiv_human
Bdiv_027840	1.46214e-20	1.04502	0.095	0.015	3.0471e-17	G	Bdiv-027840	Bdiv_human
Bdiv_004850	1.62153e-20	1.11428	0.098	0.016	3.37927e-17	G	Bdiv-004850	Bdiv_human
Bdiv_014000	1.69744e-20	1.10278	0.175	0.058	3.53746e-17	G	Bdiv-014000	Bdiv_human
Bdiv_016980c	3.54071e-20	1.03427	0.105	0.02	7.37883e-17	G	Bdiv-016980c	Bdiv_human
Bdiv_034680c	4.86658e-20	1.00413	0.199	0.073	1.0142e-16	G	Bdiv-034680c	Bdiv_human
Bdiv_013570	5.09715e-20	1.08115	0.234	0.099	1.06225e-16	G	Bdiv-013570	Bdiv_human
Bdiv_012560	7.66843e-20	1.05788	0.181	0.063	1.5981e-16	G	Bdiv-012560	Bdiv_human
Bdiv_008150c	9.33842e-20	1.00122	0.157	0.048	1.94613e-16	G	Bdiv-008150c	Bdiv_human
Bdiv_038790c	1.79334e-19	1.01844	0.193	0.072	3.73733e-16	G	Bdiv-038790c	Bdiv_human
Bdiv_021190c	2.62896e-19	1.0444	0.111	0.024	5.47875e-16	G	Bdiv-021190c	Bdiv_human
Bdiv_025000c	5.60599e-19	1.03108	0.105	0.022	1.16829e-15	G	Bdiv-025000c	Bdiv_human
Bdiv_036890c	6.33745e-19	1.0202	0.084	0.013	1.32072e-15	G	Bdiv-036890c	Bdiv_human
Bdiv_018000	1.18537e-18	1.05107	0.199	0.078	2.47031e-15	G	Bdiv-018000	Bdiv_human
Bdiv_036420	2.89925e-18	1.02044	0.118	0.03	6.04203e-15	G	Bdiv-036420	Bdiv_human
Bdiv_005380c	4.54865e-18	1.00656	0.197	0.079	9.47938e-15	G	Bdiv-005380c	Bdiv_human
Bdiv_037050	5.18998e-18	1.05899	0.114	0.028	1.08159e-14	G	Bdiv-037050	Bdiv_human
Bdiv_017290	5.62979e-18	1.00073	0.075	0.01	1.17325e-14	G	Bdiv-017290	Bdiv_human
Bdiv_006040	6.65942e-18	1.06897	0.108	0.025	1.38782e-14	G	Bdiv-006040	Bdiv_human
Bdiv_030810c	2.73212e-16	1.09345	0.101	0.025	5.69374e-13	G	Bdiv-030810c	Bdiv_human
Bdiv_015300	1.65418e-15	1.00636	0.125	0.04	3.44731e-12	G	Bdiv-015300	Bdiv_human

## Sheet: conserved markers 
GeneID	phase	spp	max_avg_log2FC	minimump_p_val	max_pval	p_val	pct.1	pct.2	p_val_adj	ProductDescriptionBdiv	GeneID_Toxo	ProductDescriptionToxo
Bdiv_000370c	SM	Bbig	3.04655	7.20015e-190	7.03695e-105	1.80004e-190	0.44	0.031	3.09067e-187	membrane protein, putative	TGGT1_300100	rhoptry neck protein RON2
Bdiv_000390c	SM	Bbig	1.73066	5.93391e-87	2.05814e-44	1.48348e-87	0.381	0.096	2.54713e-84	sortilin, putative	TGGT1_290160	putative sortilin
Bdiv_000590	SM	Bbov	1.28426	2.04531e-62	1.66524e-15	5.11327e-63	0.403	0.161	8.77948e-60	fumarate hydratase, putative	TGGT1_267330	fumarate hydratase
Bdiv_000600	G	Bbig	1.31616	2.36399e-64	4.92779e-10	5.90999e-65	0.374	0.115	1.01474e-61	splicing factor 3a protein, putative	TGGT1_221950	putative splicesome-associated protein
Bdiv_000620	G	Bdiv_human	1.15443	2.65841e-26	6.07522e-19	4.10129e-23	0.199	0.067	7.04192e-20	nuclear movement domain containing protein	TGGT1_219190	nuclear movement protein domain containing protein
Bdiv_000760c	SM	Bdiv_human	3.25008	0	1.51424e-188	1.63724e-234	0.679	0.053	2.81114e-231	hypothetical protein	TGGT1_219100	cyclin-dependent kinase regulatory subunit protein
Bdiv_000800c	SM	Bdiv_human	1.71148	1.66675e-74	2.70464e-16	4.16688e-75	0.462	0.116	7.15454e-72	hypothetical protein
Bdiv_000810	SM	Bbov	2.78074	3.3964e-243	4.56471e-68	8.49099e-244	0.538	0.054	1.4579e-240	hypothetical protein	TGGT1_285990	Filamin/ABP280 repeat-containing protein
Bdiv_000940c	SM	Bbig	2.87167	6.96664e-198	2.89263e-64	1.74166e-198	0.513	0.062	2.99043e-195	conserved hypothetical protein	TGGT1_315220	rhoptry protein ROP14
Bdiv_001120c	MC	Bbov	1.23149	1.44853e-14	1.86163e-06	3.62133e-15	0.87	0.639	6.21782e-12	conserved hypothetical protein	TGGT1_237000	putative polyphosphoinositide binding protein
Bdiv_001220	MC	Bdiv_cow	2.16435	1.97673e-77	0.000281896	4.94184e-78	0.612	0.166	8.48513e-75	conserved hypothetical protein	TGGT1_261440	ARM repeats containing protein
Bdiv_001400c	G	Bbig	1.47233	1.80463e-150	6.41942e-71	4.70314e-111	0.621	0.223	8.07529e-108	adenosylhomocysteinase (S-adenosyl-L- homocysteinehydrolase)	TGGT1_225050	putative adenosylhomocysteinase
Bdiv_001550	C	Bdiv_cow	1.20284	1.03294e-130	1.46888e-15	1.56937e-64	0.641	0.348	2.69461e-61	conserved hypothetical protein	TGGT1_310030	putative cyclase-associated protein
Bdiv_001620c	SM	Bdiv_human	2.18192	8.6164e-245	8.92316e-26	6.50126e-115	0.507	0.085	1.11627e-111	conserved hypothetical protein	TGGT1_247380	hypothetical protein
Bdiv_001720c	SM	Bdiv_human	1.55068	1.02013e-129	0.000123036	5.0311e-75	0.57	0.183	8.6384e-72	tetratricopeptide repeat domain containing protein	TGGT1_294898	tetratricopeptide repeat-containing protein
Bdiv_001770c	C	Bdiv_cow	1.98784	2.80542e-202	2.23648e-06	7.01355e-203	0.902	0.449	1.20423e-199	myosin A	TGGT1_235470	myosin A
Bdiv_001830	SM	Bdiv_human	1.12024	1.03469e-32	1.55369e-07	4.06774e-21	0.108	0.02	6.98432e-18	phosphoenolpyruvate carboxykinase, putative	TGGT1_289650	PEP-carboxykinase I
Bdiv_001930c	C	Bbig	1.75822	3.61289e-84	2.32451e-23	9.03221e-85	0.425	0.129	1.55083e-81	FHA domain containing protein	TGGT1_202840	FHA domain-containing protein
Bdiv_001970c	C	Bbig	1.92433	5.30844e-173	4.27337e-36	1.32711e-173	0.852	0.428	2.27865e-170	thioredoxin, putative
Bdiv_002000c	G	Bdiv_human	1.49467	1.78055e-81	5.13515e-25	4.87013e-35	0.177	0.033	8.36201e-32	conserved hypothetical protein	TGGT1_240970	hypothetical protein
Bdiv_002330	SM	Bbov	1.88429	2.46126e-157	8.2828e-22	6.15316e-158	0.576	0.167	1.0565e-154	cyclic nucleotide-binding domain containing protein	TGGT1_219070	cyclic nucleotide-binding domain-containing protein
Bdiv_002410c	C	Bdiv_cow	1.0953	1.19092e-162	2.37213e-64	2.9773e-163	0.982	0.867	5.11203e-160	hypothetical protein	TGGT1_318610	AP2 domain transcription factor AP2IV-3
Bdiv_002420	MC	Bdiv_cow	2.12571	2.95741e-119	0.000509926	7.39352e-120	0.983	0.396	1.26947e-116	gliding-associated protein 45, putative	TGGT1_223940	GAP45 protein
Bdiv_002520c	MC	Bbov	2.12672	5.65556e-36	5.13752e-07	5.95964e-25	0.826	0.4	1.02327e-21	hypothetical protein
Bdiv_002590	SM	Bbig	2.17502	2.52712e-118	8.81957e-09	6.3178e-119	0.328	0.035	1.08477e-115	ADP-ribosylation factor, putative
Bdiv_002640	G	Bbov	1.83146	2.17769e-159	2.61317e-05	5.44423e-160	0.563	0.149	9.34775e-157	phosphatidylinositol synthase, putative	TGGT1_207710	putative phosphatidylinositol synthase
Bdiv_002670	SM	Bdiv_human	1.78009	3.3239e-124	2.68091e-18	3.22655e-65	0.338	0.064	5.53998e-62	choline-phosphate cytidylyltransferase	TGGT1_216930	cholinephosphate cytidylyltransferase
Bdiv_002680c	MC	Bdiv_human	2.62567	1.39468e-122	2.04216e-21	1.54824e-83	0.813	0.247	2.65832e-80	hypothetical protein	TGGT1_217780	Sec20 protein
Bdiv_002800c	G	Bbov	1.64703	6.40856e-95	5.93906e-38	1.60214e-95	0.294	0.048	2.75088e-92	chain A of Ferredoxin, putative	TGGT1_215070	ferodoxin FD
Bdiv_002900c	G	Bbov	1.17414	7.27938e-136	2.43832e-62	1.81984e-136	0.836	0.477	3.12467e-133	thioredoxin peroxidase-like protein	TGGT1_217890	putative alkyl hydroperoxide reductase/ Thiol specific antioxidant/ Mal allergen
Bdiv_002920	SM	Bdiv_human	1.28463	4.06071e-62	1.79799e-13	4.91411e-36	0.32	0.104	8.43753e-33	adenylosuccinate synthetase, putative	TGGT1_279450	putative adenylosuccinate synthetase
Bdiv_003680c	SM	Bdiv_human	1.25732	2.1228e-36	4.14365e-08	3.08321e-33	0.241	0.064	5.29387e-30	brain protein 44-like protein, putative	TGGT1_235880	brain protein 44 family protein
Bdiv_003700	G	Bbig	1.19844	2.37912e-55	3.05575e-09	5.9478e-56	0.417	0.164	1.02124e-52	u1 snRNP, putative	TGGT1_205180	RNA recognition motif-containing protein
Bdiv_003820	G	Bdiv_cow	1.61208	1.43654e-83	3.33763e-30	3.59134e-84	0.264	0.048	6.16633e-81	DNA replication licensing factor MCM2, putative	TGGT1_214970	putative DNA replication licensing factor
Bdiv_003870c	C	Bbig	4.40009	0	4.87768e-240	0	0.951	0.273	0	conserved hypothetical protein	TGGT1_313380	hypothetical protein
Bdiv_003910c	C	Bdiv_cow	3.29407	0	1.09457e-16	0	0.957	0.446	0	Profilin	TGGT1_293690	profilin PRF
Bdiv_004070c	G	Bdiv_human	1.23719	1.86088e-54	5.97011e-25	8.26697e-26	0.181	0.05	1.41944e-22	hypothetical protein
Bdiv_004310	G	Bdiv_human	1.00904	1.32829e-40	3.97522e-18	3.97522e-18	0.193	0.075	6.82544e-15	hypothetical protein
Bdiv_004360	G	Bdiv_cow	1.74838	3.32609e-128	1.83158e-27	8.31523e-129	0.428	0.102	1.42772e-125	Mitochondrial carrier protein, putative	TGGT1_277090	carrier superfamily protein
Bdiv_004390c	C	Bdiv_cow	1.1637	1.99241e-82	4.03693e-09	4.98103e-83	0.806	0.544	8.55243e-80	rRNA-processing protein FCF1 homolog	TGGT1_319950	putative rRNA-processing protein FCF1
Bdiv_004410c	SM	Bbov	1.8591	0	9.79833e-119	0	0.998	0.787	0	histone H2A.F/Z,41-2 protein antigen precursor	TGGT1_300200	histone H2AZ
Bdiv_004440	C	Bdiv_human	1.24516	3.45148e-35	6.33078e-08	1.3385e-22	0.24	0.099	2.2982e-19	hypothetical protein	TGGT1_315950	zinc finger, C3HC4 type (RING finger) domain-containing protein
Bdiv_004450	SM	Bdiv_human	1.21427	2.23222e-34	7.62903e-11	4.08615e-25	0.116	0.018	7.01592e-22	conserved hypothetical protein	TGGT1_223480	sushi domain (scr repeat) domain-containing protein
Bdiv_004510c	G	Bbig	1.10085	5.3743e-46	2.28533e-21	1.34357e-46	0.351	0.136	2.30692e-43	conserved hypothetical protein
Bdiv_004580	G	Bdiv_cow	1.30722	9.76762e-56	3.86226e-23	2.44191e-56	0.239	0.064	4.19275e-53	Ribosomal RNA assembly protein mis3, putative	TGGT1_262070	putative ribosomal rna assembly protein mis3
Bdiv_004640c	SM	Bdiv_human	2.79047	1.93963e-252	6.10172e-13	2.11965e-154	0.487	0.041	3.63944e-151	DnaJ domain containing protein	TGGT1_232050	DnaJ domain-containing protein
Bdiv_004660	G	Bdiv_human	1.23372	2.00078e-48	3.68809e-18	2.17092e-22	0.109	0.019	3.72748e-19	ubiquitin-conjugating enzyme E2	TGGT1_295990	putative ubiquitin conjugating enzyme E2
Bdiv_004710	C	Bdiv_cow	1.4262	4.00823e-148	7.78128e-07	1.00206e-148	0.899	0.541	1.72053e-145	hypothetical protein
Bdiv_004730	SM	Bbig	2.33461	2.68285e-166	2.54112e-58	6.70713e-167	0.479	0.069	1.15161e-163	conserved hypothetical protein	TGGT1_244350	DnaJ domain-containing protein
Bdiv_004890c	C	Bbov	1.42576	3.27483e-206	1.67153e-25	2.34328e-170	0.916	0.688	4.02341e-167	conserved hypothetical protein	TGGT1_309560	nmda receptor glutamate-binding chain
Bdiv_004940c	MC	Bdiv_human	2.47822	2.83247e-93	8.06569e-12	1.71658e-66	0.665	0.174	2.94737e-63	membrane skeletal protein, putative	TGGT1_275670	alveolin domain containing intermediate filament IMC15
Bdiv_005000c	SM	Bbov	1.91026	3.80112e-237	5.99404e-81	9.50281e-238	0.819	0.324	1.63163e-234	hypothetical protein	TGGT1_265180	hypothetical protein
Bdiv_005010c	SM	Bdiv_human	2.02378	0	7.92833e-148	6.59573e-187	0.957	0.389	1.13249e-183	calmodulin	TGGT1_249240	putative calmodulin
Bdiv_005060c	G	Bdiv_human	1.69605	5.69758e-114	2.99513e-20	2.9008e-51	0.275	0.058	4.98068e-48	hypothetical protein	TGGT1_246630	DNA-directed RNA polymerase I RPA43
Bdiv_005110	SM	Bbov	2.45987	2.6963e-211	1.49683e-99	8.84261e-168	0.369	0.025	1.51828e-164	hypothetical protein	TGGT1_271880	B-box zinc finger domain-containing protein
Bdiv_005150	SM	Bdiv_human	2.64923	9.68263e-136	2.36448e-11	3.0259e-127	0.436	0.044	5.19547e-124	lipoate-protein ligase A, putative	TGGT1_271820	lipoyltransferase and lipoate-protein ligase subfamily protein
Bdiv_005160c	G	Bbig	1.42248	7.57964e-77	3.69079e-13	1.89491e-77	0.379	0.1	3.25356e-74	hypothetical protein	TGGT1_286790	nuclear factor NF2
Bdiv_005180c	G	Bbov	2.0207	2.34611e-163	2.02863e-10	5.86528e-164	0.437	0.062	1.00707e-160	ribonucleoside-diphosphate reductase beta subunit, putative
Bdiv_005240c	G	Bbov	1.26492	2.99338e-65	8.07927e-07	7.48346e-66	0.28	0.068	1.28491e-62	30S ribosomal protein S8, putative	TGGT1_261380	putative ribosomal protein S8
Bdiv_005270	SM	Bbig	1.68698	7.85696e-90	9.82676e-08	1.96424e-90	0.393	0.096	3.3726e-87	conserved hypothetical protein	TGGT1_209900	hypothetical protein
Bdiv_005370c	MC	Bdiv_cow	1.71248	2.41266e-39	1.37205e-05	6.03165e-40	0.545	0.225	1.03563e-36	conserved hypothetical protein	TGGT1_256780	hypothetical protein
Bdiv_005420	G	Bbig	1.26438	8.92967e-56	5.78317e-17	8.84692e-51	0.303	0.094	1.51902e-47	heat shock protein 60, putative	TGGT1_247550	heat shock protein HSP60
Bdiv_005460c	SM	Bbov	1.9353	0	2.96008e-17	0	0.997	0.738	0	histone H2B.1, putative	TGGT1_209910	histone H2Bv
Bdiv_005470	G	Bbig	1.15104	2.1119e-50	1.14667e-06	4.36401e-44	0.307	0.108	7.493e-41	splicing factor, arginine/serine-rich 3, putative	TGGT1_211420	RNA recognition motif-containing protein
Bdiv_005510	G	Bdiv_cow	1.14238	1.32549e-70	2.00761e-18	3.31374e-71	0.41	0.16	5.68968e-68	inosine-5'-monophosphate dehydrogenase, putative	TGGT1_233110	IMP dehydrogenasa
Bdiv_005540	MC	Bbov	2.81149	1.37017e-43	7.76535e-16	1.39865e-39	0.536	0.088	2.40148e-36	hypothetical protein,hypothetical protein	TGGT1_307020	hypothetical protein
Bdiv_005620c	G	Bdiv_human	2.63188	1.53e-265	9.83065e-122	9.83065e-122	0.417	0.043	1.68792e-118	chaperonin cpn60, putative	TGGT1_240600	putative chaperonin cpn60
Bdiv_005640c	G	Bdiv_cow	1.04827	1.4742e-47	1.36928e-13	3.68549e-48	0.339	0.149	6.32799e-45	hypothetical protein	TGGT1_216510	putative thioredoxin
Bdiv_005870	G	Bbig	1.51477	2.70725e-60	7.32989e-26	6.76813e-61	0.224	0.038	1.16209e-57	ATP dependent DNA helicase, putative	TGGT1_237220	putative DNA replication licensing factor Mcm7
Bdiv_005930c	SM	Bdiv_cow	1.6203	5.52171e-87	1.41923e-11	1.38043e-87	0.253	0.044	2.37019e-84	hypothetical protein	TGGT1_312840	hypothetical protein
Bdiv_006100	SM	Bbov	2.36575	0	1.42374e-34	0	0.894	0.288	0	conserved hypothetical protein
Bdiv_006110	MC	Bbig	1.40733	1.27906e-15	3.41003e-10	1.38768e-14	0.774	0.358	2.38265e-11	S1/P1 nuclease, putative	TGGT1_240280	S1/P1nuclease
Bdiv_006420	SM	Bbov	2.46023	3.42372e-183	2.3342e-49	8.5593e-184	0.412	0.032	1.46963e-180	serine/threonine protein kinase, putative	TGGT1_231070	protein kinase
Bdiv_006490c	C	Bdiv_human	3.27574	0	5.08411e-132	9.80534e-274	0.849	0.171	1.68358e-270	aspartyl protease, putative	TGGT1_246550	aspartyl protease ASP3
Bdiv_007630	SM	Bdiv_cow	1.36277	2.33134e-58	6.75403e-17	5.82835e-59	0.207	0.046	1.00073e-55	Plasmodium falciparum CPW-WPC domain containing protein	TGGT1_206440	cpw-wpc domain-containing protein
Bdiv_007730c	SM	Bdiv_human	1.00148	3.22499e-46	1.363e-19	1.77935e-32	0.398	0.163	3.05514e-29	Bax inhibitor-1, putative	TGGT1_255900	putative Bax inhibitor-1
Bdiv_007750c	SM	Bdiv_human	1.45874	7.99666e-87	1.84338e-46	1.84338e-46	0.315	0.081	3.16508e-43	formate/nitrite transporter family protein, putative	TGGT1_229170	formate/nitrite transporter protein
Bdiv_007790	SM	Bdiv_human	1.82061	1.00513e-53	1.07758e-05	2.51283e-54	0.28	0.053	4.31452e-51	XPG N-terminal domain and XPG I-region domain containing protein	TGGT1_251620	putative flap structure-specific endonuclease 1
Bdiv_007890	C	Bdiv_cow	1.85125	3.70487e-304	5.02425e-68	9.26217e-305	1	0.913	1.59031e-301	actin	TGGT1_209030	actin ACT1
Bdiv_008130c	G	Bbig	1.03677	1.70235e-26	2.2968e-09	4.25588e-27	0.138	0.035	7.30734e-24	conserved hypothetical protein	TGGT1_264130	hypothetical protein
Bdiv_008150c	G	Bdiv_cow	1.08496	1.38587e-39	2.89852e-14	3.46467e-40	0.182	0.051	5.94883e-37	conserved hypothetical protein	TGGT1_254650	zinc finger protein
Bdiv_008200c	G	Bbig	1.06932	3.52007e-38	2.76137e-13	6.64323e-32	0.139	0.029	1.14064e-28	protein phosphatase 2C domain containing protein	TGGT1_208500	protein phosphatase 2C domain-containing protein
Bdiv_008310	G	Bdiv_human	1.13605	5.50915e-34	4.13713e-18	9.56943e-27	0.165	0.038	1.64307e-23	ribosomal protein S14p/S29e domain containing protein	TGGT1_286610	putative ribosomal protein RPS14
Bdiv_008540	SM	Bdiv_human	1.4027	3.70273e-53	1.60937e-14	4.30163e-34	0.162	0.026	7.38589e-31	hypothetical protein
Bdiv_008590	G	Bbov	2.09199	6.52945e-159	2.86546e-17	1.63236e-159	0.412	0.054	2.80277e-156	membrane protein, putative
Bdiv_008700c	SM	Bdiv_human	1.50146	1.86528e-53	7.8101e-15	3.98676e-43	0.213	0.036	6.84526e-40	phosphatase inhibitor 2 domain-containing protein	TGGT1_232760	protein phosphatase inhibitor IPP2
Bdiv_009020c	SM	Bdiv_human	1.54259	9.55279e-77	2.00722e-17	1.60263e-53	0.272	0.049	2.75171e-50	SPFH domain / Band 7 family domain-containing protein	TGGT1_221850	putative prohibitin family protein
Bdiv_009100	G	Bbov	1.02665	3.12129e-90	1.0445e-06	7.80323e-91	0.711	0.358	1.33981e-87	ran binding-like protein 1	TGGT1_293340	putative ran binding family protein 1
Bdiv_009140c	G	Bdiv_cow	1.56618	7.05529e-79	1.50823e-27	1.76382e-79	0.24	0.04	3.02848e-76	ClpB, putative	TGGT1_275690	putative ClpB
Bdiv_009180	C	Bdiv_cow	3.56854	0	4.97243e-39	0	0.999	0.341	0	small heat shock protein	TGGT1_324600	heat shock protein
Bdiv_009200c	G	Bbov	1.54566	2.06847e-73	1.04667e-25	5.17119e-74	0.226	0.035	8.87893e-71	membrane protein, putative	TGGT1_205760	membrane protein
Bdiv_009230c	C	Bdiv_cow	2.91258	0	7.03865e-261	0	0.991	0.629	0	p29 protein	TGGT1_224530	alveolin domain containing intermediate filament IMC5
Bdiv_009380	G	Bbig	1.13894	1.26962e-35	4.83057e-08	3.17406e-36	0.179	0.044	5.44986e-33	u5 snRNP-specific 40 kDa protein, putative	TGGT1_310860	U5 snRNP-specific protein
Bdiv_009450	SM	Bbig	2.61135	9.53654e-231	7.85506e-107	3.58988e-180	0.443	0.039	6.16382e-177	sf-assemblin/beta giardin family protein	TGGT1_218880	putative SF-assemblin
Bdiv_009530c	SM	Bbig	1.00802	1.11482e-46	3.68756e-08	2.78705e-47	0.375	0.146	4.78537e-44	hypothetical protein	TGGT1_241160	hemolysin-III related subfamily protein
Bdiv_009600c	SM	Bbig	1.25696	3.53495e-45	7.98421e-11	8.83737e-46	0.306	0.109	1.51738e-42	adaptin N terminal region family protein	TGGT1_313670	adaptin n terminal region domain-containing protein
Bdiv_009640c	SM	Bdiv_human	1.30499	9.85572e-202	1.74191e-47	1.03564e-82	0.826	0.428	1.7782e-79	thioredoxin, putative	TGGT1_293870	putative thioredoxin
Bdiv_009650	G	Bbov	1.17787	9.43863e-51	5.13181e-05	2.35966e-51	0.208	0.047	4.05153e-48	transportin, putative	TGGT1_216590	HEAT repeat-containing protein
Bdiv_009690c	SM	Bbig	1.80247	3.28358e-88	4.3966e-14	8.20894e-89	0.344	0.073	1.40947e-85	Phosphatidylcholine transfer protein, putative
Bdiv_009710c	G	Bbig	1.28335	1.45595e-50	2.90598e-12	3.63986e-51	0.275	0.078	6.24965e-48	mago nashi protein, putative	TGGT1_267420	putative mago nashi family protein 2
Bdiv_009740	SM	Bbov	2.39248	3.26746e-157	1.5652e-07	8.16864e-158	0.367	0.031	1.40256e-154	conserved hypothetical protein	TGGT1_234410	transporter, small conductance mechanosensitive ion channel (MscS) family protein
Bdiv_010000	SM	Bbig	2.33141	8.5655e-142	0.000205191	2.14137e-142	0.361	0.03	3.67674e-139	conserved hypothetical protein	TGGT1_242000	DUF51 family protein
Bdiv_010080c	SM	Bbig	1.34754	8.39315e-46	3.52333e-06	2.09829e-46	0.223	0.056	3.60276e-43	prenyltransferase, UbiA family protein	TGGT1_206310	prenyltransferase, UbiA family protein
Bdiv_010140c	SM	Bbig	2.47247	0	2.28972e-26	0	0.964	0.314	0	conserved hypothetical protein	TGGT1_249850	GAP40 protein
Bdiv_010170c	SM	Bbov	2.59028	9.60136e-159	5.34974e-37	2.40034e-159	0.374	0.034	4.12139e-156	hypothetical protein
Bdiv_010240c	C	Bbig	4.41439	0	8.69789e-252	0	0.653	0.042	0	hypothetical protein	TGGT1_265790	hypothetical protein
Bdiv_010360	SM	Bbov	1.30508	1.48793e-57	1.36051e-23	3.71982e-58	0.292	0.089	6.38692e-55	dynamin-like protein	TGGT1_321620	dynamin-related protein DRPB
Bdiv_010500	G	Bdiv_human	2.07091	7.44533e-89	4.48474e-24	7.58259e-66	0.244	0.025	1.30193e-62	hypothetical protein
Bdiv_010550	G	Bdiv_cow	2.0131	0	3.22676e-38	0	0.869	0.321	0	splicing factor, arginine/serine-rich 3, putative	TGGT1_217540	RNA recognition motif-containing protein
Bdiv_010580c	G	Bdiv_cow	1.34413	5.38965e-106	6.5184e-18	1.34741e-106	0.54	0.22	2.31351e-103	cyclin, N-terminal domain containing protein	TGGT1_267580	cyclin2 related protein
Bdiv_010620	SM	Bdiv_human	2.28993	1.95318e-98	1.26059e-60	2.88094e-85	0.287	0.024	4.94658e-82	membrane protein, putativve
Bdiv_010750	G	Bdiv_cow	1.70508	6.09403e-108	1.98566e-53	1.52351e-108	0.319	0.055	2.61586e-105	replication factor C3 protein, putative	TGGT1_213000	putative replication factor C, subunit 5
Bdiv_010780c	G	Bdiv_cow	1.10403	8.97836e-36	4.77881e-11	2.24459e-36	0.181	0.056	3.85396e-33	hypothetical protein
Bdiv_011040	G	Bbig	1.52361	6.13945e-79	0.000156023	1.53486e-79	0.34	0.077	2.63536e-76	U4/U6 small nuclear ribonucleoprotein Prp3, putative	TGGT1_219790B	pre-mRNA processing factor PRP3
Bdiv_011270c	SM	Bbov	1.9605	6.36903e-181	2.43667e-45	1.59226e-181	0.619	0.173	2.73391e-178	Palmitoyltransferase PFA3, related	TGGT1_278850	DHHC zinc finger domain-containing protein
Bdiv_011310c	SM	Bdiv_human	1.82962	3.84647e-145	4.26518e-75	1.50722e-77	0.487	0.123	2.58789e-74	Histone H2A protein	TGGT1_261580	histone H2AX
Bdiv_011320	SM	Bbov	1.85035	1.14156e-147	2.39354e-62	2.85389e-148	0.567	0.165	4.90013e-145	Histone H3, putative	TGGT1_261240	histone H3
Bdiv_011450c	SM	Bdiv_human	2.20003	1.34278e-156	3.21403e-57	2.73755e-134	0.748	0.23	4.70037e-131	histone 2B protein, putative	TGGT1_305160	histone H2Ba
Bdiv_011490	SM	Bdiv_human	1.91821	2.36926e-108	1.23038e-05	1.70576e-59	0.238	0.029	2.92879e-56	hypothetical protein	TGGT1_205070	hypothetical protein
Bdiv_011580c	SM	Bbov	2.09208	7.68578e-138	6.76019e-11	1.92144e-138	0.46	0.107	3.29912e-135	hypothetical protein	TGGT1_232290	hypothetical protein
Bdiv_011690	C	Bbov	1.42488	5.21684e-83	2.02501e-09	1.30421e-83	0.643	0.381	2.23933e-80	vacuolar ATP synthase subunit d, putative	TGGT1_259010	putative vacuolar ATP synthase subunit d
Bdiv_011700c	SM	Bbov	1.32079	2.3126e-49	1.30885e-14	5.78151e-50	0.158	0.024	9.92685e-47	hypothetical protein	TGGT1_200330	hypothetical protein
Bdiv_011800	SM	Bbov	2.68175	9.0411e-185	5.36566e-28	2.26028e-185	0.451	0.052	3.88089e-182	membrane protein, putative	TGGT1_230350	hypothetical protein
Bdiv_012610c	C	Bdiv_cow	1.24652	8.08912e-53	3.27555e-10	2.02228e-53	0.51	0.241	3.47226e-50	conserved hypothetical protein	TGGT1_315860	EF hand domain-containing protein
Bdiv_012710	G	Bdiv_human	1.29411	5.37055e-37	1.25599e-07	1.5754e-26	0.129	0.022	2.70496e-23	Der1-like family, putative
Bdiv_012730c	G	Bbig	1.05942	1.07429e-33	8.32516e-12	2.68573e-34	0.232	0.078	4.6114e-31	CAAX metallo endopeptidase, putative	TGGT1_221170	CAAX metallo endopeptidase
Bdiv_012790	C	Bbov	1.66282	1.7832e-200	5.27125e-10	4.45801e-201	0.926	0.706	7.65441e-198	surface protein D	TGGT1_255330	hypothetical protein
Bdiv_012980	SM	Bbig	2.18018	0	4.7101e-170	4.2662e-288	0.904	0.238	7.32507e-285	conserved hypothetical protein	TGGT1_267500	hypothetical protein
Bdiv_013030c	SM	Bbov	3.12964	3.94176e-296	1.17576e-54	9.85441e-297	0.592	0.048	1.692e-293	conserved hypothetical protein	TGGT1_216460	hypothetical protein
Bdiv_013120c	G	Bbig	1.17255	2.01071e-43	9.55971e-28	5.02678e-44	0.215	0.052	8.63099e-41	conserved hypothetical protein	TGGT1_312630	putative anonymous antigen-1
Bdiv_013240	G	Bbov	1.10383	4.08084e-54	1.90537e-14	1.02021e-54	0.313	0.103	1.7517e-51	prefoldin subunit 5 (c-myc binding protein) , putative	TGGT1_315110	prefoldin, alpha subunit protein
Bdiv_013440	SM	Bbig	1.49362	5.33244e-161	0.000737974	1.33311e-161	0.843	0.379	2.28895e-158	fatty acyl-CoA synthetase 3
Bdiv_013490	G	Bbig	1.12188	2.62699e-30	2.34614e-05	4.46181e-29	0.108	0.018	7.66093e-26	DNA-directed RNA polymerase, alpha subunit, putative	TGGT1_313120	DNA-directed RNA polymerase, alpha subunit
Bdiv_013520c	MC	Bdiv_cow	1.3783	8.90922e-38	1.87497e-06	2.2273e-38	0.715	0.39	3.82428e-35	protein disulfide-isomerase, putative	TGGT1_224060	putative thioredoxin
Bdiv_013580c	C	Bdiv_cow	3.99068	0	7.94633e-292	0	0.979	0.244	0	hypothetical protein
Bdiv_013840c	G	Bdiv_human	1.21817	8.35277e-32	2.43892e-20	1.07007e-22	0.142	0.035	1.83731e-19	U3 small nucleolar ribonucleoprotein protein, putative	TGGT1_311410	putative M phase phosphoprotein MPP10
Bdiv_013880c	C	Bbov	4.31037	0	6.13507e-136	0	0.71	0.052	0	MAC/perforin domain containing protein	TGGT1_204130	perforin-like protein PLP1
Bdiv_014000	G	Bdiv_human	1.15882	2.8966e-86	4.93692e-09	1.63773e-20	0.175	0.058	2.81198e-17	antioxidant, AhpC/TSA family
Bdiv_014020c	G	Bbov	2.09088	4.94725e-196	3.50178e-10	1.23681e-196	0.559	0.105	2.12361e-193	chaperonin, 10 kDa domain containing protein	TGGT1_263530	putative chaperonin
Bdiv_014040	G	Bbov	1.85637	3.67538e-148	1.54359e-32	9.18845e-149	0.443	0.077	1.57766e-145	prohibitin, putative	TGGT1_233100	SPFH domain / Band 7 family protein
Bdiv_014120c	G	Bbig	1.82853	2.79014e-133	5.97184e-20	9.62075e-101	0.344	0.056	1.65188e-97	conserved hypothetical protein	TGGT1_255320	mRNA turnover 4 (MRT4) family protein
Bdiv_014130	G	Bbig	1.38186	1.42868e-49	3.47912e-14	3.5717e-50	0.201	0.038	6.13261e-47	conserved hypothetical protein	TGGT1_220570	hypothetical protein
Bdiv_014220	G	Bdiv_human	2.06666	2.28149e-142	2.95604e-58	1.0362e-61	0.275	0.045	1.77916e-58	ATP-dependent Clp protease adaptor protein ClpS domain containing protein	TGGT1_295910	ATP-dependent Clp protease adaptor protein ClpS protein
Bdiv_014590c	SM	Bbig	1.82817	9.47422e-274	1.70396e-132	2.09558e-184	0.774	0.294	3.5981e-181	Phosphatidate cytidylyltransferase domain- containing protein	TGGT1_271170	dolichol kinase
Bdiv_014880c	G	Bdiv_cow	1.09619	1.23982e-58	4.19104e-21	3.09955e-59	0.397	0.17	5.32192e-56	translation initiation factor IF-2, putative	TGGT1_214270	putative translation initiation factor IF-2
Bdiv_015030	SM	Bdiv_human	1.73812	1.73363e-99	1.05203e-64	1.05203e-64	0.27	0.035	1.80633e-61	60S ribosomal protein L27, putative	TGGT1_312680	putative 60S ribosomal protein L27
Bdiv_015050	G	Bbig	1.56964	2.02309e-61	1.50195e-15	5.05773e-62	0.19	0.022	8.68413e-59	conserved hypothetical protein	TGGT1_261680	hypothetical protein
Bdiv_015170	SM	Bbov	1.35276	1.0122e-71	5.14362e-19	2.53049e-72	0.393	0.135	4.34485e-69	WD domain, G-beta repeat containing protein	TGGT1_311870	WD domain, G-beta repeat-containing protein
Bdiv_015420c	G	Bbig	2.15981	9.34758e-152	2.44809e-17	2.3369e-152	0.493	0.089	4.01245e-149	hypothetical protein	TGGT1_252430	hypothetical protein
Bdiv_015750	C	Bbig	1.51848	1.44705e-83	1.11362e-07	3.61764e-84	0.566	0.242	6.21148e-81	CRAL/TRIO domain containing protein	TGGT1_269390	CRAL/TRIO domain-containing protein
Bdiv_015820c	SM	Bbig	2.80558	1.05044e-299	4.09646e-140	4.71188e-187	0.43	0.028	8.09029e-184	hypothetical protein	TGGT1_299190	B-box zinc finger domain-containing protein
Bdiv_015850c	C	Bbig	1.20031	4.14037e-36	3.8493e-13	1.03509e-36	0.367	0.177	1.77725e-33	hypothetical protein	TGGT1_216030A	hypothetical protein
Bdiv_016010	SM	Bbov	3.26718	0	6.69274e-55	0	0.731	0.073	0	NLI interacting factor-like phosphatase family protein
Bdiv_016020	SM	Bbov	1.2665	5.20018e-87	4.27548e-19	1.30004e-87	0.549	0.238	2.23218e-84	hypothetical protein	TGGT1_275680	hypothetical protein
Bdiv_016060	SM	Bbig	3.51986	0	5.66443e-64	0	0.731	0.05	0	hypothetical protein	TGGT1_208340	hypothetical protein
Bdiv_016220	C	Bbov	1.27507	2.34552e-49	2.79975e-12	5.8638e-50	0.476	0.272	1.00681e-46	thioredoxin domain containing protein
Bdiv_016230c	SM	Bbig	2.54488	3.20424e-222	6.72688e-06	8.01061e-223	0.609	0.094	1.37542e-219	histone deacetylase	TGGT1_227290	histone deacetylase HDAC3
Bdiv_016250	SM	Bbov	2.23733	8.81278e-198	5.8046e-106	2.71451e-178	0.514	0.101	4.66082e-175	hypothetical protein	TGGT1_309040	hypothetical protein
Bdiv_016260	G	Bbig	1.40094	1.76889e-122	1.86823e-26	4.42222e-123	0.678	0.257	7.59295e-120	Ser/Thr protein phosphatase family protein	TGGT1_286210	protein phosphatase 4, catalytic subunit
Bdiv_016310c	G	Bbov	1.42473	7.99748e-271	1.71501e-19	6.13577e-135	0.67	0.263	1.05351e-131	peptidyl-prolyl cis-trans isomerase, cyclophilin- type f domain containing protein
Bdiv_016320	G	Bbov	1.63302	2.29714e-179	1.57008e-14	5.74284e-180	0.746	0.278	9.86045e-177	nuclear transport factor domain containing protein	TGGT1_233350	putative nuclear transport factor 2
Bdiv_016330	SM	Bbov	2.72827	4.7026e-228	2.20754e-68	1.17565e-228	0.551	0.077	2.01859e-225	hypothetical protein	TGGT1_229010	rhoptry neck protein RON4
Bdiv_016410c	G	Bdiv_cow	1.39138	6.77168e-143	1.0178e-12	1.69292e-143	0.666	0.286	2.90674e-140	inorganic pyrophosphatase family protein	TGGT1_283830	type I inorganic pyrophosphatase PPase
Bdiv_016930	SM	Bdiv_human	2.21418	3.41198e-276	4.99413e-16	1.58627e-138	0.639	0.131	2.72362e-135	long-chain acyl-CoA synthetase, putative	TGGT1_247760	AMP-binding enzyme domain-containing protein
Bdiv_017090c	G	Bdiv_cow	1.46744	4.00232e-162	7.02501e-21	1.00058e-162	0.723	0.34	1.718e-159	eukaryotic translation initiation factor 4A, putative	TGGT1_250770	putative eukaryotic initiation factor-4A
Bdiv_017100	G	Bdiv_cow	1.39848	1.93462e-89	4.65801e-08	4.83656e-90	0.424	0.149	8.30437e-87	tRNA binding domain containing protein	TGGT1_223140	tRNA binding domain-containing protein
Bdiv_017140	SM	Bbig	2.37667	0	2.187e-97	0	0.96	0.333	0	conserved hypothetical protein	TGGT1_260500	putative COPI associated protein
Bdiv_017200	G	Bdiv_cow	1.50957	3.77874e-74	1.04939e-25	9.44685e-75	0.226	0.036	1.62202e-71	pyruvate kinase family protein	TGGT1_299070	pyruvate kinase PyKII
Bdiv_017260c	G	Bdiv_human	1.46934	1.04741e-84	2.98226e-31	3.22277e-37	0.274	0.084	5.5335e-34	protein kinase domain containing protein	TGGT1_292140	NIMA-related protein kinase NIMA1
Bdiv_017300	SM	Bbig	2.2018	1.68935e-123	5.63872e-20	1.12244e-115	0.309	0.03	1.92723e-112	dynamin central region family protein	TGGT1_267800	dynamin-related protein DRPA
Bdiv_017390	G	Bbov	1.07329	2.12868e-35	1.77354e-06	5.3217e-36	0.12	0.021	9.13736e-33	conserved hypothetical protein	TGGT1_257180	RecF/RecN/SMC N terminal domain-containing protein
Bdiv_017520c	G	Bdiv_cow	1.37834	5.75404e-109	8.30539e-05	1.43851e-109	0.496	0.176	2.46992e-106	GTP-binding protein engA, putative	TGGT1_211480	putative GTP-binding protein engA
Bdiv_017670c	SM	Bdiv_human	1.92008	1.68529e-133	2.94097e-10	2.68028e-116	0.651	0.167	4.60205e-113	protein transport protein sec61, putative	TGGT1_269980	putative preprotein translocase Sec61
Bdiv_017800	MC	Bbov	2.2214	2.28096e-68	3.21209e-10	2.62125e-29	0.768	0.265	4.50068e-26	hypothetical protein	TGGT1_223790	hypothetical protein
Bdiv_017860	SM	Bbig	1.23331	3.53171e-45	2.32199e-05	8.82927e-46	0.315	0.117	1.51599e-42	conserved hypothetical protein	TGGT1_264710	bucentaur or craniofacial development domain-containing protein
Bdiv_017910	G	Bdiv_human	1.18545	2.42714e-40	0.00116425	8.70961e-28	0.281	0.109	1.49544e-24	conserved hypothetical protein
Bdiv_017920	G	Bbig	1.74885	5.87422e-94	9.10619e-37	1.46855e-94	0.338	0.058	2.52151e-91	p68 RNA helicase protein, putative	TGGT1_313240	putative ethylene-responsive RNA helicase
Bdiv_018000	G	Bbig	1.15319	8.72062e-53	6.49869e-15	1.25181e-35	0.169	0.04	2.14935e-32	signal peptidase, putative	TGGT1_280740	signal peptidase
Bdiv_018020	G	Bbov	1.0781	1.875e-56	1.30491e-12	4.68749e-57	0.37	0.137	8.04843e-54	hypothetical protein
Bdiv_018070c	SM	Bdiv_human	1.01335	2.85474e-20	1.1756e-09	7.13685e-21	0.244	0.093	1.2254e-17	hypothetical protein
Bdiv_018750c	G	Bbig	1.09377	7.806e-53	3.47775e-12	1.9515e-53	0.498	0.23	3.35072e-50	pentatricopeptide repeat domain containing protein	TGGT1_252210	pentatricopeptide repeat domain-containing protein
Bdiv_018790	MC	Bbov	1.59552	2.9584e-23	1.83343e-08	1.17185e-11	0.565	0.287	2.01207e-08	conserved hypothetical protein	TGGT1_205490	putative integral membrane protein
Bdiv_018800	G	Bbov	1.3562	4.37452e-65	2.81267e-13	1.09363e-65	0.219	0.039	1.87776e-62	prohibitin	TGGT1_243950	putative prohibitin
Bdiv_018820c	SM	Bdiv_human	1.48161	2.05607e-71	1.23995e-22	2.19288e-49	0.246	0.041	3.76518e-46	endoplasmic reticulum oxidoreductin, putative	TGGT1_300380	putative endoplasmic reticulum oxidoreductin
Bdiv_018850c	SM	Bbig	1.61544	1.08442e-80	0.00449892	2.71105e-81	0.37	0.098	4.65487e-78	ubiquitin family domain containing protein	TGGT1_212820	ubiquitin family protein
Bdiv_019030	SM	Bdiv_human	2.17334	6.08043e-307	1.07315e-10	1.62737e-110	0.549	0.118	2.79419e-107	protein disulfide-isomerase	TGGT1_211680	protein disulfide isomerase
Bdiv_019100c	G	Bbig	1.38397	1.06617e-65	2.08826e-11	7.0931e-59	0.311	0.087	1.21789e-55	U3 small nucleolar ribonucleoprotein protein IMP3-like protein	TGGT1_209430	putative 40S ribosomal protein S4
Bdiv_019270	SM	Bdiv_human	1.11955	1.70489e-56	2.57482e-05	7.41019e-40	0.57	0.283	1.27233e-36	proliferating cell nuclear antigen 1	TGGT1_247460	proliferating cell nuclear antigen PCNA1
Bdiv_019460c	MC	Bbov	2.82218	4.68426e-93	1.07143e-16	2.69824e-54	0.928	0.232	4.63288e-51	hypothetical protein, conserved	TGGT1_289910	hypothetical protein
Bdiv_019540c	SM	Bdiv_cow	2.32525	0	2.21291e-36	0	0.89	0.38	0	high mobility group protein-like protein NHP1	TGGT1_210408	HMG (high mobility group) box domain-containing protein
Bdiv_019640c	SM	Bbig	1.8834	1.63801e-90	1.30336e-07	4.09503e-91	0.326	0.06	7.03116e-88	clathrin heavy chain	TGGT1_290950	putative clathrin heavy chain
Bdiv_019800	G	Bdiv_human	1.28242	8.99542e-47	1.34196e-29	1.34196e-29	0.103	0.008	2.30415e-26	cell division cycle protein ATPase, putative	TGGT1_321640	cell division protein CDC48AP
Bdiv_019890	SM	Bbig	1.22013	5.69801e-46	1.11244e-05	1.4245e-46	0.317	0.114	2.44587e-43	conserved hypothetical protein	TGGT1_219080	putative edge expressed protein
Bdiv_020020c	SM	Bdiv_cow	1.79438	4.21103e-171	0.00178438	1.05276e-171	0.658	0.245	1.80758e-168	conserved hypothetical protein	TGGT1_309240	CorA family Mg2+ transporter protein
Bdiv_020190c	C	Bbov	1.08319	1.22613e-28	3.41415e-07	3.06532e-29	0.378	0.228	5.26315e-26	NADH dehydrogenase, putative	TGGT1_288830	NADH dehydrogenase (NDH2-II)
Bdiv_020210c	C	Bbig	1.26086	7.70544e-54	3.20004e-14	2.1935e-54	0.506	0.244	3.76624e-51	hypothetical protein	TGGT1_250790	hypothetical protein
Bdiv_020470c	SM	Bbig	1.87617	9.22658e-88	4.66858e-06	2.30664e-88	0.308	0.054	3.96051e-85	cytochrome b5-like Heme/Steroid binding domain containing protein	TGGT1_276110	cytochrome b5 family heme/steroid binding domain-containing protein
Bdiv_020490	SM	Bdiv_human	2.39194	0	3.86746e-36	3.4079e-204	0.892	0.241	5.85136e-201	acid phosphatase, putative	TGGT1_219320	acid phosphatase GAP50
Bdiv_020650	SM	Bdiv_cow	1.52338	2.78052e-86	1.05146e-25	6.95131e-87	0.33	0.086	1.19354e-83	hypothetical protein	TGGT1_277910	thrombospondin type 1 domain-containing protein
Bdiv_020680c	SM	Bbig	1.00975	1.42758e-38	0.00183225	3.56895e-39	0.367	0.166	6.12789e-36	conserved hypothetical protein	TGGT1_249970	hypothetical protein
Bdiv_020900c	G	Bbig	1.29988	1.21422e-89	2.00492e-11	3.03555e-90	0.57	0.217	5.21204e-87	small nuclear ribonucleoprotein Sm subunit, putative	TGGT1_267350	LSM domain-containing protein
Bdiv_020930c	G	Bdiv_cow	1.75576	4.894e-166	3.40763e-12	1.2235e-166	0.582	0.177	2.10075e-163	regulator of ribosome biosynthesis, putative	TGGT1_320450	ribosome biogenesis regulatory protein (rrs1) protein
Bdiv_021060	SM	Bbig	1.42043	1.18551e-59	1.515e-07	2.96377e-60	0.295	0.077	5.08879e-57	heat shock protein 90, putative
Bdiv_021160	C	Bdiv_cow	1.82409	2.88794e-307	2.73846e-65	7.21986e-308	0.997	0.866	1.23965e-304	conserved hypothetical protein	TGGT1_220400	actin depolymerizing factor ADF
Bdiv_021270c	C	Bbig	2.0089	2.27407e-95	1.38256e-15	5.68518e-96	0.436	0.122	9.76146e-93	membrane protein, putative
Bdiv_021450	SM	Bdiv_human	1.6581	9.41802e-254	4.70353e-74	8.55485e-119	0.852	0.386	1.46887e-115	hypothetical protein	TGGT1_211040	Sec61beta family protein
Bdiv_021640	C	Bdiv_human	1.23975	1.64619e-44	2.65652e-12	1.5112e-35	0.451	0.239	2.59473e-32	Rab2	TGGT1_312050	putative small GTPase Rab2
Bdiv_021830	SM	Bdiv_human	1.39704	4.2801e-146	1.57326e-32	1.53432e-37	0.195	0.035	2.63443e-34	protein disulfide isomerase related protein	TGGT1_249270	putative protein disulfide isomerase-related protein (provisional)
Bdiv_021840c	G	Bbov	2.15384	0	2.96624e-26	0	0.962	0.381	0	GMP synthase, putative	TGGT1_230450	bifunctional GMP synthase/glutamine amidotransferase protein
Bdiv_021870	G	Bbig	1.06042	4.17967e-29	2.09998e-09	1.04492e-29	0.151	0.039	1.79412e-26	conserved hypothetical protein	TGGT1_250060	DNA-directed RNA polymerase I RPA12
Bdiv_022340	SM	Bdiv_human	2.67837	0	3.84774e-14	5.20204e-197	0.784	0.161	8.9319e-194	dephospho-CoA kinase, putative
Bdiv_022650	G	Bbov	1.18477	4.15357e-112	8.55247e-36	1.03839e-112	0.656	0.26	1.78292e-109	DnaJ chaperone, putative	TGGT1_311240	putative DnaJ family chaperone
Bdiv_022660c	SM	Bdiv_human	1.34211	2.504e-113	3.06387e-13	2.51004e-66	0.626	0.251	4.30974e-63	conserved hypothetical protein	TGGT1_258740	putative eukaryotic initiation factor-2A
Bdiv_022740	G	Bbig	2.09591	1.40568e-99	4.09886e-37	3.51419e-100	0.255	0.017	6.03387e-97	triose phosphate/phosphate translocator, putative
Bdiv_022810c	G	Bbig	2.0042	2.38315e-97	5.1252e-24	5.95788e-98	0.275	0.027	1.02297e-94	DNA replication licensing factor MCM5, putative	TGGT1_243920	putative DNA replication licensing factor MCM5
Bdiv_022850c	C	Bdiv_cow	1.12835	4.16993e-78	1.17256e-10	1.04248e-78	0.795	0.514	1.78994e-75	3'5'-cyclic nucleotide phosphodiesterase, putative
Bdiv_022900	SM	Bdiv_human	2.23478	2.77037e-225	1.62825e-27	2.94412e-130	0.533	0.08	5.05506e-127	glycerophosphoryl diester phosphodiesterase, putative
Bdiv_023090	G	Bdiv_human	1.05692	1.7072e-23	0.000589238	4.268e-24	0.225	0.079	7.32816e-21	hypothetical protein
Bdiv_023160	SM	Bbov	2.31827	1.48383e-102	3.28298e-50	3.70957e-103	0.234	0.014	6.36934e-100	membrane protein, putative	TGGT1_216940	hypothetical protein
Bdiv_023260c	SM	Bbov	2.59106	7.73154e-188	1.99564e-34	1.93288e-188	0.461	0.055	3.31876e-185	membrane protein, putative
Bdiv_023290c	SM	Bbov	2.69323	2.52906e-217	8.72541e-26	6.32266e-218	0.501	0.05	1.0856e-214	hypothetical protein	TGGT1_205670	SF-assemblin/beta giardin protein
Bdiv_023320c	G	Bdiv_human	2.6718	5.16103e-252	8.65497e-149	8.65497e-149	0.53	0.072	1.48606e-145	conserved hypothetical protein
Bdiv_023480	G	Bdiv_human	1.51831	6.00911e-108	1.79023e-25	4.54175e-56	0.425	0.145	7.79819e-53	mitochondrial import inner membrane protein, putative	TGGT1_214150	putative mitochondrial inner membrane translocase subunit TIM17
Bdiv_023560c	SM	Bbov	1.53617	6.14802e-65	9.15009e-41	1.537e-65	0.174	0.017	2.63904e-62	membrane protein, putative	TGGT1_262090	hypothetical protein
Bdiv_023730	SM	Bdiv_cow	2.1015	0	3.14955e-106	0	0.944	0.344	0	conserved hypothetical multi-pas transmembrane protein	TGGT1_206690	glideosome-associated protein with multiple-membrane spans GAPM2B
Bdiv_023820c	SM	Bbov	1.20281	9.98451e-44	6.65548e-16	2.49613e-44	0.197	0.05	4.28585e-41	WD40 repeat myosin-like protein, putative	TGGT1_278870	myosin F
Bdiv_023990c	C	Bbig	4.24173	0	0	0	0.775	0.086	0	apical membrane antigen 1	TGGT1_300130	apical membrane antigen 1 domain-containing protein
Bdiv_024000c	SM	Bbig	2.69259	6.24592e-199	5.41926e-11	1.56148e-199	0.492	0.048	2.68106e-196	hypothetical protein	TGGT1_232040	hypothetical protein
Bdiv_024130	G	Bbov	1.05834	2.43355e-148	6.40838e-18	6.08388e-149	0.914	0.634	1.0446e-145	adenylate kinase 2	TGGT1_224900	putative adenylate kinase
Bdiv_024140c	G	Bbig	1.49993	5.87241e-87	0.0027994	1.4681e-87	0.467	0.146	2.52073e-84	zinc finger protein 207	TGGT1_286710	zinc finger, c2h2 type domain-containing protein
Bdiv_024280c	G	Bbig	1.65793	5.4552e-85	5.01005e-16	1.3638e-85	0.357	0.08	2.34165e-82	replication factor C 38 kDa subunit	TGGT1_273950	putative replication factor C subunit 5
Bdiv_024360	C	Bbov	3.25319	6.97758e-262	2.70992e-40	1.7444e-262	0.727	0.181	2.99513e-259	conserved hypothetical protein	TGGT1_301350	SNARE associated protein
Bdiv_024370c	SM	Bdiv_human	2.26225	0	1.39046e-18	1.01724e-159	0.703	0.135	1.7466e-156	hexose transporter	TGGT1_214320	facilitative glucose transporter GT1
Bdiv_024410	C	Bdiv_cow	2.0943	5.81817e-163	2.19757e-23	1.45454e-163	0.665	0.205	2.49745e-160	calcium-dependent protein kinase 4	TGGT1_305860	calcium-dependent protein kinase CDPK3
Bdiv_024440c	SM	Bbig	1.74151	1.02852e-139	2.08684e-10	2.57131e-140	0.627	0.203	4.41494e-137	hypothetical protein
Bdiv_024470c	G	Bbov	1.78689	4.26556e-153	7.95214e-06	1.06639e-153	0.532	0.12	1.83099e-150	nucleosome assembly protein	TGGT1_288630	putative nucleosome assembly protein (NAP)
Bdiv_024520	G	Bbov	3.46842	0	8.75395e-230	0	0.927	0.153	0	hypothetical protein
Bdiv_024660c	C	Bbov	1.81503	1.22244e-68	5.52245e-11	3.05611e-69	0.218	0.037	5.24734e-66	conserved hypothetical protein
Bdiv_024680	SM	Bdiv_human	1.4018	2.16948e-57	1.73516e-32	6.55072e-38	0.159	0.02	1.12476e-34	myosin B	TGGT1_243250	myosin H
Bdiv_024860c	G	Bbig	1.82488	8.41304e-89	2.49382e-33	4.43665e-83	0.23	0.02	7.61773e-80	cell division protein metalloprotease FtsH, putative
Bdiv_024900c	SM	Bbov	3.25207	1.87494e-241	9.1215e-82	4.68734e-242	0.452	0.011	8.04817e-239	hypothetical protein
Bdiv_025000c	G	Bbig	1.42729	3.75889e-52	1.85978e-17	9.39723e-53	0.151	0.014	1.6135e-49	ubiquitin fusion degradation protein UFD1, putative	TGGT1_285700	ubiquitin fusion degradation protein UFD1AP
Bdiv_025210	G	Bbov	1.10766	6.35529e-67	4.67534e-10	1.58882e-67	0.472	0.199	2.72801e-64	transmembrane CLPTM1 family protein	TGGT1_205240	cleft lip and palate transmembrane protein 1 (clptm1) protein
Bdiv_025310	SM	Bbov	2.54871	6.83635e-158	9.20697e-94	1.63085e-148	0.33	0.021	2.80017e-145	membrane protein, putative	TGGT1_311470	rhoptry neck protein RON5
Bdiv_025340c	MC	Bbov	3.24605	1.33087e-83	4.66905e-05	3.32719e-84	0.884	0.121	5.71278e-81	hypothetical protein	TGGT1_253600	hypothetical protein
Bdiv_025470	G	Bdiv_human	1.17446	3.84973e-241	1.64482e-41	1.1364e-117	0.939	0.656	1.95121e-114	lactate dehydrogenase	TGGT1_291040	lactate dehydrogenase LDH2
Bdiv_026900	SM	Bdiv_human	1.36418	2.68688e-67	1.50434e-40	1.50434e-40	0.185	0.027	2.58296e-37	GCC2 and GCC3 domain containing protein
Bdiv_026940	G	Bdiv_human	1.46589	9.13442e-41	3.54101e-31	1.84593e-37	0.23	0.057	3.16946e-34	membrane protein, putative
Bdiv_027100c	SM	Bbov	1.57034	5.27503e-65	3.99592e-33	1.31876e-65	0.197	0.028	2.26431e-62	membrane protein, putative	TGGT1_321580	putative membrane protein
Bdiv_027180	G	Bdiv_cow	1.25595	3.27192e-55	2.41655e-23	8.1798e-56	0.166	0.024	1.40447e-52	hypothetical protein
Bdiv_027200	G	Bbig	1.59901	1.40125e-187	2.09348e-38	3.50312e-188	0.867	0.39	6.01486e-185	conserved hypothetical protein	TGGT1_271810	putative lanp
Bdiv_027290c	G	Bbig	1.66627	1.95901e-102	1.22716e-18	3.0847e-75	0.251	0.036	5.29643e-72	ribosomal protein L35, putative	TGGT1_285530	ribosomal protein RPL35
Bdiv_027330	SM	Bdiv_cow	2.47766	6.59783e-253	0.000210266	1.64946e-253	0.554	0.078	2.83212e-250	serine hydroxymethyltransferase, putative	TGGT1_234190	putative serine hydroxymethyltransferase 2
Bdiv_027520c	G	Bbov	1.01992	5.42651e-75	4.73071e-07	1.35663e-75	0.645	0.334	2.32933e-72	proliferation-associated protein 2g4, putative	TGGT1_279390	putative proliferation-associated protein 2G4
Bdiv_027570c	SM	Bbov	3.16395	5.89533e-231	1.36156e-97	1.47383e-231	0.483	0.037	2.53057e-228	mitogen-activated protein kinase, putative	TGGT1_207820	putative cell-cycle-associated protein kinase MAPK
Bdiv_027750	G	Bbig	1.14988	9.36592e-38	2.95489e-08	2.34148e-38	0.237	0.074	4.02032e-35	WD domain, G-beta repeat containing protein	TGGT1_290850	WD-40 repeat protein
Bdiv_027800	G	Bbig	1.45127	9.07922e-75	0.000271354	2.26981e-75	0.393	0.117	3.89726e-72	bromodomain protein, putative	TGGT1_264640	bromodomain-containing protein
Bdiv_027810c	SM	Bbov	1.34097	2.87656e-121	7.54043e-07	7.19139e-122	0.694	0.335	1.23476e-118	succinate dehydrogenase iron-sulfur subunit, putative	TGGT1_215280	succinate dehydrogenase [ubiquinone] iron-sulfur protein
Bdiv_027870	C	Bdiv_cow	2.57339	1.62178e-204	0.00423807	4.05445e-205	0.622	0.129	6.96148e-202	serine/threonin protein phosphatase, putative	TGGT1_251850	serine/threonine protein phosphatase
Bdiv_028030	C	Bbov	5.92755	0	6.14832e-236	0	0.956	0.113	0	membrane protein, putative
Bdiv_028100	MC	Bdiv_cow	2.05038	4.74122e-65	4.83646e-09	1.1853e-65	0.579	0.171	2.03517e-62	hypothetical protein
Bdiv_028150c	G	Bbov	1.59288	0	4.49201e-116	1.66998e-266	0.946	0.464	2.86736e-263	cyclophilin, putative	TGGT1_230520	putative cyclophilin 1
Bdiv_028170c	MC	Bbov	2.47559	8.69533e-49	0.0046298	2.57311e-40	0.768	0.193	4.41803e-37	hypothetical protein
Bdiv_028230c	G	Bdiv_human	1.52443	7.24634e-42	7.03166e-18	1.05226e-35	0.204	0.046	1.80673e-32	ABC transporter	TGGT1_239020	ABC transporter transmembrane region domain-containing protein
Bdiv_028300	G	Bbov	1.17881	6.06824e-64	1.33258e-05	1.51706e-64	0.386	0.14	2.60479e-61	dihydrolipoamide succinyltransferase, putative	TGGT1_219550	dihydrolipoyllysine-residue succinyltransferase component of oxoglutarate dehydrogenase
Bdiv_028330	C	Bbov	4.94829	0	1.78305e-132	0	0.943	0.071	0	membrane protein, putative
Bdiv_028440c	G	Bbig	1.31982	8.19356e-51	5.89901e-17	1.68032e-45	0.164	0.026	2.88511e-42	translation elongation factor G (EF-G), putative	TGGT1_223970	putative translation elongation and release factors (gtpases)
Bdiv_028580c	SM	Bdiv_human	2.55615	2.12398e-146	3.41923e-68	6.39527e-88	0.238	0.007	1.09807e-84	hypothetical protein	TGGT1_208330	hypothetical protein
Bdiv_028690	G	Bbov	1.03548	3.18885e-54	2.30043e-20	6.35575e-42	0.179	0.043	1.09128e-38	serine/threonine-protein kinase , putative	TGGT1_313180	putative cell-cycle-associated protein kinase PRP4
Bdiv_028940c	G	Bbig	1.02455	1.70142e-37	2.57128e-11	1.11489e-32	0.206	0.065	1.91426e-29	conserved hypothetical protein	TGGT1_218570	Nin one binding (NOB1) Zn-ribbon family protein
Bdiv_029250	G	Bdiv_cow	1.06412	1.0132e-48	9.4334e-21	2.533e-49	0.293	0.109	4.34916e-46	RNA recognition motif containing protein	TGGT1_215400	RNA recognition motif-containing protein
Bdiv_029570	G	Bbig	2.13419	1.55196e-258	1.29524e-105	3.80219e-202	0.681	0.161	6.52836e-199	heat shock protein 70	TGGT1_251780	heat shock protein
Bdiv_029880c	G	Bdiv_cow	1.16542	2.12158e-176	1.37866e-55	5.30394e-177	0.868	0.511	9.10687e-174	eIF-4A-like DEAD family RNA helicase, putative	TGGT1_216860	DEAD (Asp-Glu-Ala-Asp) box polypeptide DDX39
Bdiv_029910c	SM	Bbig	1.37823	5.13688e-143	2.01424e-54	2.47496e-142	0.831	0.445	4.24951e-139	protein transport protein SEC61 gamma subunit, putative	TGGT1_230380	protein translocation complex, SEC61 gamma subunit
Bdiv_030120c	G	Bdiv_human	1.81988	4.09248e-158	2.39262e-20	2.95468e-86	0.489	0.127	5.07318e-83	glucose-6-phosphate isomerase protein	TGGT1_283780	glucose-6-phosphate isomerase GPI
Bdiv_030410c	G	Bbig	1.58022	1.62493e-58	2.45722e-09	4.06232e-59	0.195	0.026	6.97501e-56	Zinc-finger double-stranded RNA-binding domain- containing protein
Bdiv_030420c	SM	Bdiv_cow	1.67825	3.80413e-146	5.43529e-24	9.51033e-147	0.52	0.14	1.63292e-143	predicted protein,predicted protein	TGGT1_314770	tRNA (guanine-N1)-methyltransferase
Bdiv_030820c	SM	Bdiv_cow	1.36763	6.9219e-75	7.29101e-06	1.73048e-75	0.281	0.069	2.97123e-72	hypothetical protein	TGGT1_281380	hypothetical protein
Bdiv_030890	MC	Bbov	2.63421	2.63242e-51	6.25281e-10	5.04731e-44	0.899	0.26	8.66622e-41	Metacaspase-1	TGGT1_278975	ICE family protease (caspase) p20 domain-containing protein
Bdiv_030950c	SM	Bbig	1.51176	5.03515e-57	2.16336e-28	5.92387e-55	0.164	0.018	1.01713e-51	B-box zinc finger domain-containing protein	TGGT1_242320	B-box zinc finger domain-containing protein
Bdiv_031010c	G	Bdiv_human	2.0529	1.10071e-94	2.82034e-13	7.31208e-75	0.389	0.086	1.25548e-71	triosephosphate isomerase protein, putative	TGGT1_225930	triose-phosphate isomerase TPI-I
Bdiv_031060c	SM	Bdiv_cow	1.2882	4.94322e-70	3.80398e-32	1.23581e-70	0.334	0.106	2.12188e-67	Phosphatidate phosphatase LPIN, putative	TGGT1_230690	LNS2 (Lipin/Ned1/Smp2) protein
Bdiv_031070	SM	Bdiv_human	2.42678	2.74589e-181	4.01164e-84	1.08943e-103	0.305	0.016	1.87055e-100	DHHC zinc finger domain/ankyrin repeat containing protein	TGGT1_293730	DHHC zinc finger domain-containing protein
Bdiv_031200c	MC	Bbov	2.80129	1.53814e-138	2.39015e-15	7.18102e-57	0.913	0.202	1.23298e-53	conserved hypothetical protein	TGGT1_231630	alveolin domain containing intermediate filament IMC4
Bdiv_031540	G	Bdiv_human	1.54076	0	3.33484e-66	4.53586e-224	0.995	0.729	7.78807e-221	hypothetical protein	TGGT1_260440	nuclear factor NF3
Bdiv_031550	G	Bbov	1.37927	1.55333e-67	3.5844e-20	3.88332e-68	0.226	0.04	6.66766e-65	armadillo/beta-catenin-like repeat domain containing protein	TGGT1_252290	putative importin alpha
Bdiv_031730c	SM	Bbov	2.83703	0	3.47965e-39	0	0.999	0.537	0	membrane protein, putative	TGGT1_205330	hypothetical protein
Bdiv_031750	SM	Bdiv_human	1.37817	1.5512e-56	0.000133183	2.40741e-51	0.413	0.126	4.13352e-48	Glutamate/Leucine/Phenylalanine/Valine dehydrogenase family protein	TGGT1_249390	glutamate/leucine/phenylalanine/valine dehydrogenase family protein
Bdiv_031830	G	Bbig	1.29701	1.16977e-43	0.000179495	2.92443e-44	0.227	0.06	5.02124e-41	hypothetical protein	TGGT1_271030	AP2 domain transcription factor AP2VIII-6
Bdiv_031930	G	Bdiv_cow	1.02115	2.3703e-183	8.4546e-44	5.92576e-184	0.933	0.63	1.01745e-180	NAC domain containing protein	TGGT1_205558	NAC domain-containing protein
Bdiv_032030c	G	Bdiv_cow	1.44652	1.60356e-69	1.83716e-08	4.0089e-70	0.286	0.078	6.88328e-67	MYG1 protein, putative	TGGT1_315250	putative GAMM1 protein
Bdiv_032340c	SM	Bdiv_human	3.03127	1.02999e-181	1.42601e-34	1.73436e-113	0.313	0.012	2.97789e-110	Plasmodium falciparum CPW-WPC domain containing protein	TGGT1_278690	cpw-wpc domain-containing protein
Bdiv_032630c	SM	Bdiv_cow	2.28571	0	3.38086e-184	0	0.974	0.334	0	conserved hypothetical protein	TGGT1_271970	glideosome-associated protein with multiple-membrane spans GAPM3
Bdiv_032710	C	Bdiv_human	1.52576	4.25209e-89	2.43161e-05	1.06302e-89	0.695	0.344	1.82521e-86	hypothetical protein	TGGT1_299020	AP2 domain transcription factor AP2III-4
Bdiv_032780	SM	Bbig	1.93728	6.43964e-138	5.17953e-25	4.27862e-124	0.441	0.088	7.34639e-121	vacuolar protein sorting-associated protein 26 family protein	TGGT1_263500	putative vacuolar protein sorting-associated protein 26
Bdiv_032810c	SM	Bdiv_human	1.09213	4.82279e-37	4.25534e-10	3.63591e-27	0.169	0.037	6.24286e-24	membrane protein, putative	TGGT1_232120	hypothetical protein
Bdiv_032840	G	Bbig	1.56087	1.50164e-59	2.40719e-16	3.75411e-60	0.169	0.014	6.44581e-57	tRNA synthetases class I (W and Y) family protein	TGGT1_254110	tryptophanyl-tRNA synthetase (TrpRS1)
Bdiv_032880	C	Bdiv_cow	2.75578	9.6719e-280	1.35439e-10	2.41798e-280	0.653	0.091	4.15166e-277	WD domain, G-beta repeat containing protein	TGGT1_216970	putative coronin
Bdiv_033310c	C	Bbov	1.11371	2.77954e-32	0.000372166	2.51387e-23	0.33	0.203	4.31631e-20	V-type ATPase 116kDa subunit family protein	TGGT1_232830	putative vacuolar proton translocating ATPase subunit A
Bdiv_033680c	G	Bdiv_human	1.59664	1.67979e-52	1.11389e-36	3.97585e-41	0.179	0.026	6.82653e-38	hypothetical protein	TGGT1_207960	hypothetical protein
Bdiv_033720	SM	Bdiv_human	2.01184	6.68946e-287	1.02315e-66	7.94422e-168	0.866	0.275	1.36402e-164	heat shock protein 70 precursor, putative	TGGT1_311720	chaperonin protein BiP
Bdiv_033730	G	Bbov	1.41671	8.47471e-218	8.35611e-09	2.11868e-218	0.926	0.492	3.63777e-215	casein kinase II, alpha chain (CK II)	TGGT1_263070	CMGC kinase, CK2 family
Bdiv_033870	G	Bbig	1.11622	7.33785e-43	1.37725e-08	1.73801e-40	0.274	0.094	2.98416e-37	WD domain, G-beta repeat containing protein	TGGT1_218420	WD domain, G-beta repeat-containing protein
Bdiv_033940	G	Bbov	1.22567	1.01952e-47	1.71246e-16	2.54879e-48	0.211	0.054	4.37628e-45	hypothetical protein	TGGT1_254500	hypothetical protein
Bdiv_033960	SM	Bbig	1.43255	2.83271e-59	4.18159e-23	7.08177e-60	0.288	0.077	1.21594e-56	conserved hypothetical protein	TGGT1_237010	hypothetical protein
Bdiv_033980	SM	Bdiv_human	1.74955	3.64832e-225	5.86351e-19	5.4562e-89	0.728	0.307	9.36829e-86	core histone H2A/H2B/H3/H4 family protein	TGGT1_239260	histone H4
Bdiv_033990c	C	Bdiv_cow	3.02787	0	3.9187e-81	0	0.832	0.155	0	protein kinase domain containing protein	TGGT1_239420	protein kinase
Bdiv_034020c	SM	Bdiv_human	2.71329	0	3.39647e-201	5.92257e-220	0.82	0.156	1.01691e-216	membrane-associated calcum-binding protein, putative	TGGT1_229480	putative calcium binding protein precursor
Bdiv_034130c	G	Bbig	1.548	1.44383e-98	2.90027e-24	3.60958e-99	0.496	0.148	6.19765e-96	heat shock protein 90
Bdiv_034270c	G	Bbig	1.93417	8.88174e-152	1.96842e-36	2.22043e-152	0.586	0.147	3.81249e-149	isocitrate dehydrogenase, NADP-dependent family protein	TGGT1_266760	isocitrate dehydrogenase
Bdiv_034310c	G	Bdiv_human	1.18902	2.99504e-144	2.83626e-27	2.83626e-27	0.266	0.101	4.86985e-24	acetyltransferase, GNAT family protein	TGGT1_289900	n-acetyltransferase family protein
Bdiv_034330c	SM	Bdiv_human	1.64511	3.3226e-51	7.01549e-20	1.4558e-43	0.321	0.093	2.49962e-40	conserved hypothetical protein	TGGT1_221190	putative mrna cleavage factor family protein
Bdiv_034350c	C	Bdiv_cow	2.92533	0	2.97637e-22	0	0.806	0.158	0	conserved hypothetical protein	TGGT1_258410	photosensitized INA-labeled protein PHIL1
Bdiv_034690	SM	Bbig	1.3564	1.25281e-55	1.77038e-08	3.13203e-56	0.359	0.128	5.37769e-53	hypothetical protein	TGGT1_260250	cyclin domain protein, cyclin H family protein
Bdiv_034720	SM	Bdiv_human	2.33454	6.6927e-171	8.08559e-30	1.1169e-117	0.462	0.064	1.91772e-114	small GTP-binding protein, putative
Bdiv_034800	C	Bdiv_cow	1.05664	1.67581e-39	0.000194841	4.18952e-40	0.479	0.244	7.19341e-37	membrane protein, putative
Bdiv_034880	G	Bbov	2.41267	5.07579e-213	4.94354e-43	1.26895e-213	0.499	0.059	2.17878e-210	chaperonin, 10 kDa family protein	TGGT1_273960	chaperonin GroS protein
Bdiv_034980c	SM	Bdiv_human	1.36328	2.28958e-55	3.35848e-08	5.72396e-56	0.467	0.149	9.82804e-53	thymidylate kinase, putative	TGGT1_306970	thymidylate kinase
Bdiv_035010c	SM	Bbov	2.10259	1.98343e-175	1.332e-10	4.95857e-176	0.657	0.213	8.51387e-173	membrane protein, putative
Bdiv_035130	SM	Bdiv_cow	1.25006	1.91702e-62	3.05884e-05	4.79255e-63	0.249	0.063	8.22882e-60	apurinic endonuclease (APN1) family protein	TGGT1_288680	endonuclease IV APN
Bdiv_035170c	G	Bdiv_cow	1.08292	1.70194e-58	6.80302e-16	4.25485e-59	0.355	0.138	7.30558e-56	WD domain, G-beta repeat containing protein	TGGT1_228100	hypothetical protein
Bdiv_035230	SM	Bbov	2.58644	1.55728e-228	0.000613201	3.89319e-229	0.558	0.079	6.68461e-226	hypothetical protein
Bdiv_035250	G	Bbig	1.7066	5.51672e-160	1.1174e-12	1.37918e-160	0.713	0.249	2.36805e-157	Sm domain containing protein	TGGT1_300280	LSM domain-containing protein
Bdiv_035340c	SM	Bbov	2.54427	6.26791e-220	4.53599e-33	1.56698e-220	0.521	0.062	2.6905e-217	hypothetical protein	TGGT1_261500	hydrolase
Bdiv_035500	G	Bdiv_human	1.16599	1.08917e-50	0.000287318	8.8473e-26	0.234	0.082	1.51908e-22	RNA recognition motif domaining containing protein
Bdiv_035640	C	Bdiv_cow	1.70133	9.81076e-177	4.55914e-89	2.45269e-177	0.895	0.493	4.21127e-174	protein kinase domain containing protein	TGGT1_226030	AGC kinase
Bdiv_035650	SM	Bbov	2.27226	6.29559e-145	2.06237e-57	1.5739e-145	0.319	0.019	2.70238e-142	conserved hypothetical protein
Bdiv_035870	C	Bbov	1.73049	4.44015e-80	7.99928e-29	1.11004e-80	0.504	0.227	1.90594e-77	hypothetical protein	TGGT1_248460	putative ubiquitin
Bdiv_036290	SM	Bdiv_cow	1.33588	4.62507e-109	2.23364e-08	1.15627e-109	0.589	0.248	1.98531e-106	hypothetical protein	TGGT1_320580	hypothetical protein
Bdiv_036320c	G	Bbov	1.80725	1.8434e-171	6.06124e-38	4.60849e-172	0.581	0.135	7.91278e-169	conserved hypothetical protein	TGGT1_255245	hypothetical protein
Bdiv_036330	G	Bbig	1.2732	8.16208e-56	4.27537e-15	2.04052e-56	0.326	0.099	3.50357e-53	U1 zinc finger family protein	TGGT1_306380	U1 zinc finger protein
Bdiv_036410	SM	Bbov	2.02108	1.70811e-121	0.00417875	4.27026e-122	0.392	0.077	7.33204e-119	transporter, major facilitator family	TGGT1_253700	transporter, major facilitator family protein
Bdiv_036490c	G	Bdiv_human	1.97688	7.36142e-172	4.69241e-74	4.69241e-74	0.366	0.076	8.05686e-71	EF hand domain containing protein	TGGT1_247230	centrin
Bdiv_036680c	G	Bbig	2.18759	3.93528e-124	1.68278e-27	9.8382e-125	0.357	0.041	1.68922e-121	hypothetical protein	TGGT1_256840	hypothetical protein
Bdiv_036720c	SM	Bbov	2.54457	1.4757e-189	9.39954e-42	3.68926e-190	0.4	0.022	6.33446e-187	SNARE domain containing protein
Bdiv_036750c	C	Bdiv_cow	2.14914	1.76707e-156	1.40141e-43	4.41767e-157	0.396	0.05	7.58514e-154	conserved hypothetical protein	TGGT1_315160	hypothetical protein
Bdiv_036910c	G	Bbig	1.13225	1.94468e-68	5.44635e-16	3.94649e-60	0.507	0.23	6.77612e-57	ATPase, AFG1 family protein,'chromo' (CHRromatin Organization MOdifier) domain containing protein	TGGT1_217020	ATPase, AFG1 family protein
Bdiv_036920c	G	Bbig	1.33345	9.44003e-59	1.77035e-21	2.00774e-48	0.195	0.037	3.4473e-45	hypothetical protein	TGGT1_239680	hypothetical protein
Bdiv_037120c	G	Bdiv_human	1.88249	1.18181e-297	7.53727e-141	1.15024e-149	0.824	0.317	1.97496e-146	hsp90 protein	TGGT1_288380	heat shock protein HSP90
Bdiv_037130	G	Bbov	1.17008	1.88951e-76	0.00111665	4.72378e-77	0.449	0.162	8.11073e-74	dnaK family protein	TGGT1_219310	DnaK family protein
Bdiv_037290c	G	Bbov	1.02501	3.09276e-82	2.83676e-08	5.33954e-53	0.374	0.147	9.168e-50	hypothetical protein
Bdiv_037320c	C	Bbig	3.42003	7.22123e-247	9.97976e-121	3.13802e-181	0.443	0.043	5.38798e-178	hypothetical protein
Bdiv_037350c	C	Bbig	1.28928	1.53442e-93	2.66929e-26	3.83605e-94	0.776	0.499	6.58649e-91	Ras family protein	TGGT1_310460	Rab6
Bdiv_037470	G	Bdiv_human	1.33077	1.82717e-46	0.00432067	1.58411e-30	0.245	0.079	2.71991e-27	hypothetical protein
Bdiv_037760	SM	Bbig	1.99106	3.36571e-133	8.85363e-61	1.11094e-112	0.359	0.054	1.90748e-109	hypothetical protein	TGGT1_232150	hypothetical protein
Bdiv_037780	SM	Bdiv_human	1.88596	1.77823e-240	9.89251e-107	9.89251e-107	0.626	0.165	1.69854e-103	tubulin beta chain	TGGT1_212240	putative beta-1 tubulin
Bdiv_037800c	MC	Bbov	2.82315	1.29872e-85	2.76186e-27	9.1481e-50	0.841	0.201	1.57073e-46	hypothetical protein	TGGT1_235370	hypothetical protein
Bdiv_037940	G	Bbig	1.39377	2.50077e-59	6.93424e-10	6.25192e-60	0.265	0.059	1.07345e-56	hypothetical protein	TGGT1_268950	hypothetical protein
Bdiv_037960	SM	Bbov	3.61725	0	4.00534e-114	0	0.694	0.065	0	DHHC zinc finger domain containing protein	TGGT1_252200	cell cycle regulator with zn-finger domain-containing protein
Bdiv_038080c	SM	Bdiv_human	1.00151	1.17272e-26	9.4745e-11	4.50835e-20	0.136	0.034	7.74084e-17	ThiF family protein	TGGT1_231940	ThiF family protein
Bdiv_038160c	MC	Bbov	2.7662	5.96378e-95	9.64657e-45	3.92294e-48	0.768	0.163	6.73568e-45	hypothetical protein	TGGT1_297340	hypothetical protein
Bdiv_038310	C	Bdiv_cow	1.73755	1.2325e-228	2.88784e-39	3.08125e-229	0.978	0.682	5.29051e-226	hypothetical protein	TGGT1_257680	myosin light chain MLC1
Bdiv_038320	MC	Bbov	2.68531	5.22201e-41	6.25665e-21	3.20904e-36	0.942	0.526	5.50993e-33	hypothetical protein	TGGT1_267300	hypothetical protein
Bdiv_038330c	SM	Bbig	1.51602	2.30416e-57	0.00228209	5.76039e-58	0.265	0.065	9.89059e-55	conserved hypothetical protein
Bdiv_038390	SM	Bdiv_human	1.09743	7.05491e-105	1.83341e-39	1.83341e-39	0.457	0.184	3.14796e-36	membrane protein, putative	TGGT1_258820	hypothetical protein
Bdiv_038450c	G	Bbig	1.09382	8.64855e-35	1.73136e-10	2.16214e-35	0.257	0.093	3.71239e-32	SNF2 family N-terminal domain containing protein	TGGT1_229460	SWI2/SNF2-containing protein
Bdiv_038490	SM	Bdiv_human	2.27952	3.37424e-295	1.70133e-125	1.70133e-125	0.534	0.087	2.92118e-122	tubulin alpha chain, putative	TGGT1_316400B	alpha tubulin TUBA1
Bdiv_038630	G	Bdiv_human	1.214	7.28033e-52	5.28462e-10	5.04781e-29	0.28	0.105	8.66708e-26	structure specific recognition protein, putative	TGGT1_261460	transcriptional elongation factor FACT80
Bdiv_038990c	SM	Bbov	2.87154	5.99774e-222	2.1887e-22	1.49944e-222	0.44	0.019	2.57453e-219	DHHC zinc finger domain containing protein
Bdiv_039000c	G	Bdiv_cow	1.36237	2.56151e-67	9.44467e-26	6.40378e-68	0.274	0.071	1.09953e-64	ubiquitin family protein	TGGT1_258720	putative Ubiquitin family protein
Bdiv_039100	SM	Bdiv_human	2.22984	2.54385e-281	3.70796e-49	7.35175e-155	0.775	0.225	1.26229e-151	hypothetical protein
Bdiv_039190c	G	Bbov	1.03591	7.22846e-47	2.01582e-07	1.80711e-47	0.21	0.052	3.10282e-44	conserved hypothetical protein	TGGT1_268600	DNA polymerase epsilon subunit B protein
Bdiv_039290c	G	Bdiv_human	2.17801	2.33903e-275	1.87549e-148	1.93673e-156	0.733	0.215	3.32537e-153	conserved hypothetical protein	TGGT1_214790	glycoprotein
Bdiv_039410c	MC	Bbov	2.47323	7.60491e-36	9.25017e-24	1.90123e-36	0.739	0.19	3.26441e-33	hypothetical protein
Bdiv_039530	SM	Bdiv_human	1.77615	1.44616e-145	4.15413e-54	6.80922e-92	0.592	0.174	1.16914e-88	centrin, putative	TGGT1_250340	centrin 2
Bdiv_039740	C	Bbov	1.48244	5.42013e-35	0.00453454	1.35503e-35	0.181	0.053	2.32659e-32	conserved hypothetical protein	TGGT1_222030	hypothetical protein
Bdiv_039780c	SM	Bdiv_human	1.57037	6.49331e-105	1.30279e-08	3.61639e-72	0.598	0.223	6.20933e-69	Rab7	TGGT1_248880	GTPase RAB7
Bdiv_039890c	SM	Bdiv_cow	1.38914	2.3432e-95	1.55593e-06	5.85799e-96	0.47	0.17	1.00582e-92	regulator of chromosome condensation (RCC1) domain containing protein	TGGT1_213900	regulator of chromosome condensation RCC1
Bdiv_039980c	SM	Bdiv_human	2.47074	0	2.66695e-205	3.88823e-217	0.879	0.196	6.67609e-214	conserved hypothetical protein	TGGT1_202510	multi-pass transmembrane protein
Bdiv_040080	SM	Bdiv_human	1.23715	2.16348e-65	1.95229e-14	1.28383e-40	0.369	0.12	2.20433e-37	hypothetical protein	TGGT1_225810	BIR protein
Bdiv_040100c	G	Bbig	1.10696	3.66234e-45	4.74406e-11	9.15584e-46	0.382	0.161	1.57206e-42	hypothetical protein	TGGT1_209860	SRP40, C-terminal domain-containing protein
Bdiv_040270c	G	Bdiv_human	1.81884	9.3479e-143	6.80877e-20	4.6029e-82	0.478	0.129	7.90318e-79	eukaryotic translation initiation factor 5, putative	TGGT1_244650	putative eukaryotic initiation factor-5
Bdiv_040360	MC	Bbov	2.87258	3.27787e-134	6.63458e-29	1.36501e-47	1	0.38	2.34373e-44	conserved hypothetical protein	TGGT1_265420	hypothetical protein
Bdiv_040490c	G	Bbig	1.22209	2.99848e-45	1.16689e-05	7.4962e-46	0.27	0.082	1.2871e-42	T-complex protein beta subunit, putative	TGGT1_243710	t-complex protein beta subunit
Bdiv_040500	SM	Bbov	2.58461	2.56546e-173	1.2418e-12	6.41366e-174	0.472	0.074	1.10122e-170	conserved hypothetical protein
Bdiv_040540	C	Bdiv_cow	2.7997	2.94856e-239	6.83826e-23	7.37141e-240	0.665	0.13	1.26567e-236	hypothetical protein
Bdiv_040570	C	Bbig	1.01398	2.02884e-73	1.5015e-11	5.07211e-74	0.821	0.584	8.70881e-71	Rab1b	TGGT1_214770	putative small GTP binding protein rab1a

## Sheet: species specific markers
GeneID	p_val	avg_log2FC	pct.1	pct.2	p_val_adj	ref	ref.spp	phase	pct.ratio	ProductDescriptionBdiv	GeneID_Toxo	ProductDescriptionToxo
Bdiv_000300	8.78965e-180	2.00132	0.417	0.064	1.50918e-176	Bbov:SM	Bbov	SM	6.51562	conserved hypothetical protein
Bdiv_000590	3.40591e-59	1.137	0.403	0.178	5.84794e-56	Bbov:SM	Bbov	SM	2.26404	fumarate hydratase, putative	TGGT1_267330	fumarate hydratase
Bdiv_000760c	3.87204e-138	1.16557	0.829	0.479	6.64829e-135	Bdiv_cow:SM	Bdiv_cow	SM	1.73069	hypothetical protein	TGGT1_219100	cyclin-dependent kinase regulatory subunit protein
Bdiv_000950	8.85677e-48	3.45017	0.899	0.171	1.52071e-44	Bbov:MC	Bbov	MC	5.25731	thiodoxin reductase, putative	TGGT1_309730	thioredoxin reductase
Bdiv_001120c	0	2.61461	0.943	0.473	0	Bbig:C	Bbig	C	1.99366	conserved hypothetical protein	TGGT1_237000	putative polyphosphoinositide binding protein
Bdiv_001420c	1.10939e-170	1.84903	0.472	0.119	1.90483e-167	Bbig:G	Bbig	G	3.96639	base excision DNA repair protein, HhH-GPD family domain containing protein,hypothetical protein	TGGT1_305920	endonuclease III family 1 protein
Bdiv_001550	1.36314e-106	1.37501	0.607	0.32	2.34051e-103	Bbov:SM	Bbov	SM	1.89688	conserved hypothetical protein	TGGT1_310030	putative cyclase-associated protein
Bdiv_001800c	2.38083e-142	2.21983	0.438	0.064	4.08789e-139	Bbig:C	Bbig	C	6.84375	endonuclease/exonuclease/phosphatase family domain containing protein	TGGT1_204410	endonuclease/exonuclease/phosphatase family protein
Bdiv_001970c	0	5.37536	0.852	0.024	0	Bbig:C	Bbig	C	35.5	thioredoxin, putative
Bdiv_002160	4.27923e-61	5.43776	0.986	0.191	7.34744e-58	Bbov:MC	Bbov	MC	5.1623	nucleotide-binding protein 1, putative	TGGT1_280730	putative cytosolic fe-s cluster assembling factor nbp35
Bdiv_002330	1.28748e-99	1.26248	0.576	0.275	2.21061e-96	Bbov:SM	Bbov	SM	2.09455	cyclic nucleotide-binding domain containing protein	TGGT1_219070	cyclic nucleotide-binding domain-containing protein
Bdiv_002520c	2.20895e-152	1.75822	0.677	0.3	3.79277e-149	Bbov:SM	Bbov	SM	2.25667	hypothetical protein
Bdiv_002780c	0	2.95768	0.81	0.181	0	Bbov:SM	Bbov	SM	4.47514	Copper transporter 1, putative	TGGT1_262710	Ctr copper transporter family protein
Bdiv_002810c	5.60912e-128	1.13809	0.529	0.186	9.63086e-125	Bdiv_cow:G	Bdiv_cow	G	2.84409	cytidine diphosphate-diacylglycerol synthase, putative	TGGT1_281980	phosphatidate cytidylyltransferase
Bdiv_002840c	3.3127e-99	1.69067	0.52	0.164	5.6879e-96	Bbig:C	Bbig	C	3.17073	cell cycle regulator protein, putative	TGGT1_221490	cell cycle regulator protein
Bdiv_002900c	1.22865e-243	1.23462	0.98	0.769	2.10958e-240	Bbig:SM	Bbig	SM	1.27438	thioredoxin peroxidase-like protein	TGGT1_217890	putative alkyl hydroperoxide reductase/ Thiol specific antioxidant/ Mal allergen
Bdiv_003170c	1.54224e-118	1.12176	0.679	0.284	2.64802e-115	Bdiv_cow:SM	Bdiv_cow	SM	2.39085	secretory protein, putative	TGGT1_260790	RAP domain-containing protein
Bdiv_003260	1.05065e-20	1.02862	0.333	0.183	1.80397e-17	Bdiv_human:SM	Bdiv_human	SM	1.81967	DHHC zinc finger domain containing protein	TGGT1_301370	DHHC zinc finger domain-containing protein
Bdiv_003360	9.19822e-67	1.2708	0.259	0.077	1.57933e-63	Bbov:G	Bbov	G	3.36364	suppressor Mra1 family domain containing protein	TGGT1_313980	putative ribosome biogenesis protein nep1
Bdiv_003390	1.75999e-185	1.93233	0.39	0.061	3.0219e-182	Bbov:G	Bbov	G	6.39344	transcription factor S-II (TFIIS)and transcription factor S-II (TFIIS) central domain containing protein	TGGT1_293670	transcription elongation factor A TFIIS
Bdiv_003530	5.3951e-06	1.20746	0.339	0.122	0.00926339	Bbig:MC	Bbig	MC	2.77869	DnaJ domain containing protein	TGGT1_313310	DnaJ domain-containing protein
Bdiv_003610c	5.1823e-94	1.25168	0.454	0.156	8.89801e-91	Bdiv_cow:SM	Bdiv_cow	SM	2.91026	calcium ATPase SERCA-like, putative	TGGT1_230420	sarco/endoplasmic reticulum Ca2+-ATPase
Bdiv_003870c	1.16508e-185	2.129	0.951	0.836	2.00044e-182	Bbig:C	Bbig	C	1.13756	conserved hypothetical protein	TGGT1_313380	hypothetical protein
Bdiv_003890	9.20695e-98	1.05299	0.665	0.325	1.58083e-94	Bdiv_cow:SM	Bdiv_cow	SM	2.04615	Rab11b protein, putative	TGGT1_320480	Rab11b
Bdiv_003910c	0	2.67367	0.965	0.52	0	Bbov:G	Bbov	G	1.85577	Profilin	TGGT1_293690	profilin PRF
Bdiv_004100c	4.17355e-42	1.62889	0.218	0.061	7.16598e-39	Bbov:C	Bbov	C	3.57377	guanylate kinase, putative	TGGT1_242730	guanylate kinase family protein
Bdiv_004440	6.80294e-20	1.09356	0.24	0.118	1.16806e-16	Bdiv_human:C	Bdiv_human	C	2.0339	hypothetical protein	TGGT1_315950	zinc finger, C3HC4 type (RING finger) domain-containing protein
Bdiv_004710	1.17658e-181	1.71309	0.899	0.326	2.0202e-178	Bdiv_cow:C	Bdiv_cow	C	2.75767	hypothetical protein
Bdiv_004850	5.20781e-69	1.11905	0.287	0.088	8.94181e-66	Bbov:G	Bbov	G	3.26136	gcpE protein	TGGT1_262430	4-hydroxy-3-methylbut-2-en-1-yl diphosphate synthase
Bdiv_004940c	7.54819e-49	1.18126	0.492	0.288	1.29602e-45	Bbov:SM	Bbov	SM	1.70833	membrane skeletal protein, putative	TGGT1_275670	alveolin domain containing intermediate filament IMC15
Bdiv_004990	7.61064e-92	1.53045	0.274	0.064	1.30675e-88	Bbig:G	Bbig	G	4.28125	conserved hypothetical protein	TGGT1_304900	hypothetical protein
Bdiv_005000c	4.01189e-184	1.47506	0.819	0.48	6.88842e-181	Bbov:SM	Bbov	SM	1.70625	hypothetical protein	TGGT1_265180	hypothetical protein
Bdiv_005030c	6.10126e-28	1.04548	0.44	0.27	1.04759e-24	Bdiv_human:C	Bdiv_human	C	1.62963	conserved hypothetical protein	TGGT1_288910	DUF866 domain-containing protein
Bdiv_005170	4.69449e-139	1.46889	0.707	0.369	8.06044e-136	Bbig:SM	Bbig	SM	1.91599	conserved hypothetical protein	TGGT1_237250	hypothetical protein
Bdiv_005210c	3.22586e-81	1.25338	0.364	0.114	5.53881e-78	Bbov:SM	Bbov	SM	3.19298	3'5'-cyclic nucleotide phosphodiesterase, putative	TGGT1_202540	3'5'-cyclic nucleotide phosphodiesterase domain-containing protein
Bdiv_005290c	1.28299e-66	1.33556	0.192	0.042	2.20289e-63	Bbig:G	Bbig	G	4.57143	conserved hypothetical protein	TGGT1_270960	hypothetical protein
Bdiv_005340	4.86999e-50	1.01472	0.265	0.09	8.36177e-47	Bdiv_cow:SM	Bdiv_cow	SM	2.94444	hypothetical protein
Bdiv_005370c	4.1656e-206	1.9468	0.51	0.113	7.15233e-203	Bbov:G	Bbov	G	4.51327	conserved hypothetical protein	TGGT1_256780	hypothetical protein
Bdiv_005380c	4.79625e-270	1.68671	0.879	0.371	8.23515e-267	Bbov:SM	Bbov	SM	2.36927	single stranded G-strand telomeric DNA-binding protein, putative	TGGT1_262620	RNA recognition motif-containing protein
Bdiv_005460c	0	1.78544	0.997	0.738	0	Bbov:SM	Bbov	SM	1.35095	histone H2B.1, putative	TGGT1_209910	histone H2Bv
Bdiv_005510	1.17713e-63	1.02621	0.586	0.377	2.02112e-60	Bbig:G	Bbig	G	1.55438	inosine-5'-monophosphate dehydrogenase, putative	TGGT1_233110	IMP dehydrogenasa
Bdiv_005540	2.07928e-37	1.0099	0.53	0.321	3.57012e-34	Bdiv_human:C	Bdiv_human	C	1.65109	hypothetical protein,hypothetical protein	TGGT1_307020	hypothetical protein
Bdiv_005700c	1.76086e-79	1.29448	0.26	0.065	3.02339e-76	Bbov:G	Bbov	G	4	minichromosome maintenance protein 3, putative	TGGT1_216730	MCM2/3/5 family protein
Bdiv_005720c	9.28683e-223	2.22837	0.63	0.175	1.59455e-219	Bbig:SM	Bbig	SM	3.6	conserved hypothetical protein	TGGT1_231130	hypothetical protein
Bdiv_006130c	1.67605e-25	2.6795	0.391	0.035	2.87778e-22	Bbov:MC	Bbov	MC	11.1714	GTPase activator protein, putative	TGGT1_203910	TBC domain-containing protein
Bdiv_006490c	1.09387e-18	1.68402	0.758	0.223	1.87818e-15	Bbig:MC	Bbig	MC	3.3991	aspartyl protease, putative	TGGT1_246550	aspartyl protease ASP3
Bdiv_007600	5.2727e-40	1.0916	0.366	0.195	9.05322e-37	Bbig:SM	Bbig	SM	1.87692	hexokinase	TGGT1_265450	hexokinase
Bdiv_007730c	1.02543e-27	2.12488	0.903	0.3	1.76067e-24	Bbig:MC	Bbig	MC	3.01	Bax inhibitor-1, putative	TGGT1_255900	putative Bax inhibitor-1
Bdiv_007780	9.36927e-160	2.10028	0.312	0.029	1.6087e-156	Bbov:SM	Bbov	SM	10.7586	conserved hypothetical protein	TGGT1_219300	ran binding protein
Bdiv_008390c	1.5897e-75	1.2741	0.329	0.103	2.72951e-72	Bbov:SM	Bbov	SM	3.19417	adenylate and guanylate cyclase catalytic domain containing protein	TGGT1_254370	guanylyl cyclase
Bdiv_008440	7.99724e-45	1.03185	0.197	0.058	1.37313e-41	Bbov:SM	Bbov	SM	3.39655	MIZ zinc finger domain containing protein	TGGT1_278640	MIZ/SP-RING zinc finger domain-containing protein
Bdiv_008540	1.39076e-50	1.0011	0.32	0.128	2.38793e-47	Bbov:SM	Bbov	SM	2.5	hypothetical protein
Bdiv_008590	1.14622e-60	1.01316	0.412	0.184	1.96806e-57	Bbov:G	Bbov	G	2.23913	membrane protein, putative
Bdiv_008710	3.71585e-74	1.17469	0.163	0.024	6.38012e-71	Bbov:G	Bbov	G	6.79167	hypothetical protein	TGGT1_211250	hypothetical protein
Bdiv_009180	8.48693e-33	1.91717	0.986	0.938	1.45721e-29	Bbov:MC	Bbov	MC	1.05117	small heat shock protein	TGGT1_324600	heat shock protein
Bdiv_009230c	1.46056e-33	1.60355	1	0.887	2.50779e-30	Bbov:MC	Bbov	MC	1.1274	p29 protein	TGGT1_224530	alveolin domain containing intermediate filament IMC5
Bdiv_009530c	1.3263e-29	2.49413	0.742	0.142	2.27725e-26	Bbig:MC	Bbig	MC	5.22535	hypothetical protein	TGGT1_241160	hemolysin-III related subfamily protein
Bdiv_009780c	2.29064e-126	1.73633	0.416	0.109	3.93303e-123	Bbov:SM	Bbov	SM	3.81651	conserved hypothetical protein
Bdiv_009990c	1.34671e-56	1.14313	0.362	0.147	2.31231e-53	Bbig:SM	Bbig	SM	2.46259	hypothetical protein
Bdiv_010000	7.65288e-44	1.07746	0.361	0.175	1.314e-40	Bbig:SM	Bbig	SM	2.06286	conserved hypothetical protein	TGGT1_242000	DUF51 family protein
Bdiv_010020c	5.48375e-61	1.12171	0.237	0.061	9.41561e-58	Bdiv_cow:SM	Bdiv_cow	SM	3.88525	hypothetical protein
Bdiv_010110c	1.05158e-125	1.87424	0.465	0.15	1.80557e-122	Bbig:SM	Bbig	SM	3.1	hypothetical protein
Bdiv_010340c	9.71208e-81	1.62135	0.326	0.098	1.66756e-77	Bbig:SM	Bbig	SM	3.32653	glycoprotease family protein	TGGT1_202310	O-sialoglycoprotein endopeptidase
Bdiv_010420	2.69239e-40	1.16346	0.105	0.016	4.62284e-37	Bbig:SM	Bbig	SM	6.5625	DHHC zinc finger domain containing protein	TGGT1_213550	DHHC zinc finger domain-containing protein
Bdiv_010580c	4.43557e-107	1.52966	0.655	0.294	7.61588e-104	Bbov:C	Bbov	C	2.22789	cyclin, N-terminal domain containing protein	TGGT1_267580	cyclin2 related protein
Bdiv_010590	1.87357e-92	1.01923	0.899	0.743	3.21692e-89	Bbov:C	Bbov	C	1.20996	proteolipid subunit c, putative	TGGT1_212310	vacuolar ATP synthetase
Bdiv_010630	1.00315e-99	1.78299	0.574	0.221	1.72241e-96	Bdiv_human:C	Bdiv_human	C	2.59729	arginyl-tRNA synthetase, putative	TGGT1_210840	arginyl-tRNA synthetase family protein
Bdiv_010930c	6.72477e-18	2.02927	0.532	0.116	1.15464e-14	Bbig:MC	Bbig	MC	4.58621	tyrosyl-tRNA synthetase, putative	TGGT1_251880	tRNA synthetases class I family protein
Bdiv_011270c	4.22647e-07	1.03641	0.661	0.329	0.000725685	Bbig:MC	Bbig	MC	2.00912	Palmitoyltransferase PFA3, related	TGGT1_278850	DHHC zinc finger domain-containing protein
Bdiv_011550	2.12145e-11	1.52123	0.484	0.136	3.64253e-08	Bbig:MC	Bbig	MC	3.55882	Potassium channel, putative	TGGT1_238995	ion channel protein
Bdiv_011580c	6.32184e-78	1.35371	0.46	0.208	1.08546e-74	Bbov:SM	Bbov	SM	2.21154	hypothetical protein	TGGT1_232290	hypothetical protein
Bdiv_011610c	3.7979e-89	1.41124	0.631	0.271	6.52099e-86	Bbig:C	Bbig	C	2.32841	hypothetical protein	TGGT1_310950	AP2 domain transcription factor AP2XI-3
Bdiv_011690	1.2654e-86	1.42334	0.643	0.338	2.17269e-83	Bbov:C	Bbov	C	1.90237	vacuolar ATP synthase subunit d, putative	TGGT1_259010	putative vacuolar ATP synthase subunit d
Bdiv_011800	7.81422e-85	1.55088	0.451	0.185	1.3417e-81	Bbov:SM	Bbov	SM	2.43784	membrane protein, putative	TGGT1_230350	hypothetical protein
Bdiv_012610c	1.36535e-36	1.27413	0.42	0.226	2.34431e-33	Bdiv_human:C	Bdiv_human	C	1.85841	conserved hypothetical protein	TGGT1_315860	EF hand domain-containing protein
Bdiv_012630c	3.59568e-83	1.1599	0.604	0.364	6.17379e-80	Bbig:G	Bbig	G	1.65934	T-complex protein 1 zeta subunit	TGGT1_318410	putative TCP-1 chaperonin
Bdiv_012930	1.36478e-36	1.24166	0.206	0.056	2.34333e-33	Bbig:C	Bbig	C	3.67857	jmjC transcription factor, putative	TGGT1_307010	histone lysine demethylase JMJC1/KDM5D/JARID1D
Bdiv_013040c	3.1076e-98	1.20298	0.76	0.286	5.33574e-95	Bdiv_cow:C	Bdiv_cow	C	2.65734	hypothetical protein	TGGT1_276930	hypothetical protein
Bdiv_013090c	2.70513e-43	1.26431	0.201	0.063	4.64471e-40	Bbig:SM	Bbig	SM	3.19048	hypothetical protein
Bdiv_013120c	1.45634e-33	1.12202	0.434	0.245	2.50053e-30	Bdiv_human:C	Bdiv_human	C	1.77143	conserved hypothetical protein	TGGT1_312630	putative anonymous antigen-1
Bdiv_013360c	1.09106e-30	1.03264	0.186	0.076	1.87336e-27	Bbov:G	Bbov	G	2.44737	hypothetical protein	TGGT1_245650	hypothetical protein
Bdiv_013370	1.32656e-80	1.34144	0.272	0.071	2.2777e-77	Bbov:G	Bbov	G	3.83099	S-adenosyl methyltransferase, putative	TGGT1_215510	MraW methylase family protein
Bdiv_013440	0	2.92772	0.843	0.238	0	Bbig:SM	Bbig	SM	3.54202	fatty acyl-CoA synthetase 3
Bdiv_013520c	1.80929e-87	1.40482	0.656	0.243	3.10654e-84	Bdiv_cow:C	Bdiv_cow	C	2.69959	protein disulfide-isomerase, putative	TGGT1_224060	putative thioredoxin
Bdiv_013580c	2.4173e-25	1.75833	0.986	0.73	4.15051e-22	Bbov:MC	Bbov	MC	1.35068	hypothetical protein
Bdiv_013610	1.50318e-195	1.82071	0.643	0.198	2.58095e-192	Bdiv_cow:SM	Bdiv_cow	SM	3.24747	chromatin assembly factor 1 subunit C, putative	TGGT1_247250	RbAp46
Bdiv_013880c	2.08372e-76	1.28241	0.71	0.417	3.57774e-73	Bbov:C	Bbov	C	1.70264	MAC/perforin domain containing protein	TGGT1_204130	perforin-like protein PLP1
Bdiv_014000	8.88757e-168	1.65684	0.702	0.284	1.526e-164	Bbig:SM	Bbig	SM	2.47183	antioxidant, AhpC/TSA family
Bdiv_014630	1.31444e-49	1.00201	0.34	0.142	2.25689e-46	Bdiv_cow:SM	Bdiv_cow	SM	2.39437	human hepatopoietin-like protein, putative	TGGT1_210787	Erv1 / Alr family protein
Bdiv_014710	1.07226e-282	2.83646	0.725	0.108	1.84107e-279	Bbig:C	Bbig	C	6.71296	1-phosphatidylinositol-4-phosphate 5-kinase , putative	TGGT1_230490	phosphatidylinositol-4-phosphate 5-kinase
Bdiv_015020c	2.1723e-150	1.99458	0.477	0.127	3.72984e-147	Bbov:SM	Bbov	SM	3.75591	hypothetical protein
Bdiv_015140c	5.30781e-160	1.3913	0.647	0.211	9.11351e-157	Bdiv_cow:SM	Bdiv_cow	SM	3.06635	conserved hypothetical protein
Bdiv_015160c	6.5133e-62	1.21264	0.2	0.043	1.11833e-58	Bbov:SM	Bbov	SM	4.65116	hypothetical protein	TGGT1_228400	WD domain, G-beta repeat-containing protein
Bdiv_015180c	7.25885e-48	1.03686	0.237	0.077	1.24635e-44	Bbov:SM	Bbov	SM	3.07792	vacuolar sorting protein 9 (VPS9) domain containing protein	TGGT1_230140	vacuolar sorting protein 9 (vps9) domain-containing protein
Bdiv_015190	0	3.77088	0.907	0.135	0	Bbig:SM	Bbig	SM	6.71852	acyltransferase family protein	TGGT1_240860	acyltransferase domain-containing protein
Bdiv_015240c	6.56803e-43	1.31113	0.16	0.04	1.12773e-39	Bbig:SM	Bbig	SM	4	Conserved oligomeric Golgi complex subunit 4, related	TGGT1_212150	hypothetical protein
Bdiv_015420c	3.30299e-123	1.62363	0.493	0.188	5.67124e-120	Bbig:G	Bbig	G	2.62234	hypothetical protein	TGGT1_252430	hypothetical protein
Bdiv_015570	3.89083e-53	1.31589	0.538	0.259	6.68055e-50	Bdiv_human:SM	Bdiv_human	SM	2.07722	hypothetical protein	TGGT1_216090	hypothetical protein
Bdiv_015670	1.4527e-178	1.45976	0.481	0.11	2.49428e-175	Bdiv_cow:G	Bdiv_cow	G	4.37273	RNA pseudouridylate synthase family protein	TGGT1_298980	RNA pseudouridine synthase superfamily protein
Bdiv_015780c	9.99309e-74	1.46272	0.463	0.215	1.71581e-70	Bdiv_cow:SM	Bdiv_cow	SM	2.15349	anti-silencing protein, ASF1-like family protein	TGGT1_209140	anti-silencing protein, ASF1 family protein
Bdiv_016010	1.8034e-39	3.39942	0.725	0.119	3.09644e-36	Bbov:MC	Bbov	MC	6.09244	NLI interacting factor-like phosphatase family protein
Bdiv_016020	1.07436e-104	1.35626	0.549	0.236	1.84467e-101	Bbov:SM	Bbov	SM	2.32627	hypothetical protein	TGGT1_275680	hypothetical protein
Bdiv_016060	5.57153e-116	1.32247	0.731	0.414	9.56631e-113	Bbig:SM	Bbig	SM	1.7657	hypothetical protein	TGGT1_208340	hypothetical protein
Bdiv_016220	6.0418e-141	2.30584	0.476	0.099	1.03738e-137	Bbov:C	Bbov	C	4.80808	thioredoxin domain containing protein
Bdiv_016230c	2.41709e-95	1.34687	0.609	0.328	4.15015e-92	Bbig:SM	Bbig	SM	1.85671	histone deacetylase	TGGT1_227290	histone deacetylase HDAC3
Bdiv_016240	3.62931e-73	1.14446	0.24	0.058	6.23153e-70	Bbov:G	Bbov	G	4.13793	tRNA synthetase class II core domain containing protein
Bdiv_016260	2.44215e-125	1.44807	0.678	0.411	4.19317e-122	Bbig:G	Bbig	G	1.64964	Ser/Thr protein phosphatase family protein	TGGT1_286210	protein phosphatase 4, catalytic subunit
Bdiv_016310c	5.47842e-191	1.0689	0.976	0.691	9.40644e-188	Bdiv_cow:SM	Bdiv_cow	SM	1.41245	peptidyl-prolyl cis-trans isomerase, cyclophilin- type f domain containing protein
Bdiv_016330	1.9374e-108	1.49529	0.551	0.236	3.32652e-105	Bbov:SM	Bbov	SM	2.33475	hypothetical protein	TGGT1_229010	rhoptry neck protein RON4
Bdiv_016360c	3.16195e-49	1.01617	0.437	0.246	5.42906e-46	Bbig:G	Bbig	G	1.77642	deoxyhypusine synthase, putative	TGGT1_235620	deoxyhypusine synthase
Bdiv_016480	5.36841e-19	1.97764	0.387	0.049	9.21756e-16	Bbig:MC	Bbig	MC	7.89796	conserved hypothetical protein	TGGT1_237870	FYVE zinc finger domain-containing protein
Bdiv_016930	5.90672e-255	2.64476	0.736	0.141	1.01418e-251	Bbig:C	Bbig	C	5.21986	long-chain acyl-CoA synthetase, putative	TGGT1_247760	AMP-binding enzyme domain-containing protein
Bdiv_016990c	1.83227e-91	1.03963	0.635	0.302	3.146e-88	Bdiv_cow:SM	Bdiv_cow	SM	2.10265	conserved hypothetical protein	TGGT1_209890	hypothetical protein
Bdiv_017040	1.49561e-66	1.01645	0.43	0.179	2.56796e-63	Bdiv_cow:SM	Bdiv_cow	SM	2.40223	hypothetical protein	TGGT1_305340	corepressor complex CRC230
Bdiv_017060c	9.23229e-52	1.2611	0.321	0.133	1.58518e-48	Bbig:SM	Bbig	SM	2.41353	hypothetical protein	TGGT1_217160	Der1 family protein
Bdiv_017140	9.11364e-220	1.29499	0.96	0.723	1.56481e-216	Bbig:SM	Bbig	SM	1.3278	conserved hypothetical protein	TGGT1_260500	putative COPI associated protein
Bdiv_017200	1.19429e-224	2.75558	0.638	0.117	2.05059e-221	Bbov:C	Bbov	C	5.45299	pyruvate kinase family protein	TGGT1_299070	pyruvate kinase PyKII
Bdiv_017290	2.9588e-65	1.24485	0.332	0.125	5.08026e-62	Bbov:G	Bbov	G	2.656	ubiquitin family protein
Bdiv_017390	1.68256e-189	1.81267	0.519	0.106	2.88895e-186	Bdiv_cow:SM	Bdiv_cow	SM	4.89623	conserved hypothetical protein	TGGT1_257180	RecF/RecN/SMC N terminal domain-containing protein
Bdiv_017520c	3.69664e-108	1.09753	0.496	0.186	6.34714e-105	Bdiv_cow:G	Bdiv_cow	G	2.66667	GTP-binding protein engA, putative	TGGT1_211480	putative GTP-binding protein engA
Bdiv_017540	8.88784e-281	2.7963	0.528	0.063	1.52604e-277	Bbig:SM	Bbig	SM	8.38095	geranylgeranyl transferase type II beta subunit, putative	TGGT1_316270	putative Rab geranylgeranyl transferase type II beta subunit
Bdiv_017690c	7.27882e-74	1.13461	0.489	0.23	1.24977e-70	Bbov:SM	Bbov	SM	2.12609	conserved hypothetical protein
Bdiv_017880	1.20443e-23	1.1256	0.38	0.219	2.06801e-20	Bdiv_human:SM	Bdiv_human	SM	1.73516	conserved hypothetical protein	TGGT1_320005	hypothetical protein
Bdiv_017910	2.00588e-52	1.25629	0.285	0.108	3.44409e-49	Bbov:SM	Bbov	SM	2.63889	conserved hypothetical protein
Bdiv_018110c	2.89666e-20	1.06227	0.343	0.197	4.97356e-17	Bdiv_human:SM	Bdiv_human	SM	1.74112	hypothetical protein	TGGT1_235670	hypothetical protein
Bdiv_018140c	4.4302e-118	1.49512	0.353	0.071	7.60665e-115	Bdiv_cow:SM	Bdiv_cow	SM	4.97183	prenyltransferase, UbiA family protein	TGGT1_259130	4-hydroxybenzoate polyprenyl transferase
Bdiv_018420c	6.86015e-196	1.9549	0.608	0.178	1.17789e-192	Bbov:SM	Bbov	SM	3.41573	conserved hypothetical protein	TGGT1_225530	metal cation transporter, ZIP family protein
Bdiv_018750c	1.81754e-109	1.76065	0.498	0.216	3.12072e-106	Bbig:G	Bbig	G	2.30556	pentatricopeptide repeat domain containing protein	TGGT1_252210	pentatricopeptide repeat domain-containing protein
Bdiv_018790	1.29023e-54	1.18497	0.455	0.198	2.21533e-51	Bbov:C	Bbov	C	2.29798	conserved hypothetical protein	TGGT1_205490	putative integral membrane protein
Bdiv_018850c	6.76564e-62	1.34658	0.37	0.159	1.16166e-58	Bbig:SM	Bbig	SM	2.32704	ubiquitin family domain containing protein	TGGT1_212820	ubiquitin family protein
Bdiv_019030	5.87657e-207	1.27061	0.973	0.689	1.00901e-203	Bbig:SM	Bbig	SM	1.41219	protein disulfide-isomerase	TGGT1_211680	protein disulfide isomerase
Bdiv_019460c	3.78163e-18	1.40898	0.928	0.71	6.49306e-15	Bbov:MC	Bbov	MC	1.30704	hypothetical protein, conserved	TGGT1_289910	hypothetical protein
Bdiv_019640c	9.11506e-08	1.42739	0.355	0.112	0.000156506	Bbig:MC	Bbig	MC	3.16964	clathrin heavy chain	TGGT1_290950	putative clathrin heavy chain
Bdiv_019910	2.8784e-110	1.17187	0.664	0.3	4.94221e-107	Bdiv_cow:SM	Bdiv_cow	SM	2.21333	glucose-6-phosphate dehydrogenase-6- phosphogluconolactonase	TGGT1_278830	glucose-6-phosphate 1-dehydrogenase
Bdiv_020020c	4.33105e-93	1.08101	0.658	0.324	7.43641e-90	Bdiv_cow:SM	Bdiv_cow	SM	2.03086	conserved hypothetical protein	TGGT1_309240	CorA family Mg2+ transporter protein
Bdiv_020210c	2.81057e-10	1.25071	0.677	0.276	4.82574e-07	Bbig:MC	Bbig	MC	2.4529	hypothetical protein	TGGT1_250790	hypothetical protein
Bdiv_020470c	7.44817e-58	1.65119	0.356	0.123	1.27885e-54	Bdiv_human:C	Bdiv_human	C	2.89431	cytochrome b5-like Heme/Steroid binding domain containing protein	TGGT1_276110	cytochrome b5 family heme/steroid binding domain-containing protein
Bdiv_020480	4.07526e-11	1.29961	0.812	0.595	6.99723e-08	Bbov:MC	Bbov	MC	1.36471	membrane protein, putative
Bdiv_020970	1.33701e-14	1.27412	0.659	0.397	2.29565e-11	Bdiv_human:MC	Bdiv_human	MC	1.65995	choline/ethanolamine kinase, putative	TGGT1_306540	phosphotransferase enzyme family protein
Bdiv_021000c	4.84017e-13	2.05687	0.478	0.15	8.31057e-10	Bbov:MC	Bbov	MC	3.18667	hypothetical protein	TGGT1_310930	hypothetical protein
Bdiv_021160	2.7009e-159	1.09051	0.996	0.83	4.63745e-156	Bdiv_human:C	Bdiv_human	C	1.2	conserved hypothetical protein	TGGT1_220400	actin depolymerizing factor ADF
Bdiv_021230	5.60616e-34	1.01435	0.379	0.224	9.62578e-31	Bbig:SM	Bbig	SM	1.69196	conserved hypothetical protein	TGGT1_311400	WD domain, G-beta repeat-containing protein
Bdiv_021250c	1.28663e-94	1.41143	0.323	0.087	2.20914e-91	Bbov:G	Bbov	G	3.71264	RNAse P protein subunit domain containing protein
Bdiv_021260	0	2.83828	0.854	0.211	0	Bbov:G	Bbov	G	4.04739	hypothetical protein	TGGT1_244515	hypothetical protein
Bdiv_021640	6.00458e-59	1.46021	0.451	0.19	1.03099e-55	Bdiv_human:C	Bdiv_human	C	2.37368	Rab2	TGGT1_312050	putative small GTPase Rab2
Bdiv_021690c	2.73258e-145	1.82524	0.431	0.096	4.69185e-142	Bbov:SM	Bbov	SM	4.48958	hypothetical protein	TGGT1_216670	FUSE-binding protein 2 / KH-type splicing regulatory protein
Bdiv_021830	3.78257e-256	3.54923	0.47	0.009	6.49467e-253	Bbov:C	Bbov	C	52.2222	protein disulfide isomerase related protein	TGGT1_249270	putative protein disulfide isomerase-related protein (provisional)
Bdiv_022250c	2.94483e-67	1.36018	0.175	0.033	5.05627e-64	Bbig:G	Bbig	G	5.30303	conserved hypothetical protein
Bdiv_022340	6.79819e-174	1.20981	0.871	0.437	1.16725e-170	Bdiv_cow:SM	Bdiv_cow	SM	1.99314	dephospho-CoA kinase, putative
Bdiv_022710	3.30949e-53	1.15538	0.408	0.198	5.68239e-50	Bbig:SM	Bbig	SM	2.06061	mu1 adaptin	TGGT1_289770	mu1 adaptin
Bdiv_022790	9.15797e-30	3.1209	0.667	0.144	1.57242e-26	Bbov:MC	Bbov	MC	4.63194	P-type ATPase4, putative	TGGT1_278660	putative P-type ATPase4
Bdiv_022880c	1.48056e-42	1.0957	0.232	0.089	2.54213e-39	Bbig:G	Bbig	G	2.60674	hypothetical protein	TGGT1_285520	RNA cap guanine-N2 methyltransferase
Bdiv_022900	3.63667e-236	2.08326	0.641	0.198	6.24416e-233	Bbig:G	Bbig	G	3.23737	glycerophosphoryl diester phosphodiesterase, putative
Bdiv_023040	1.0809e-44	1.02549	0.241	0.091	1.8559e-41	Bbig:G	Bbig	G	2.64835	conserved hypothetical protein	TGGT1_266470	hypothetical protein
Bdiv_023150c	3.21108e-55	1.25929	0.182	0.046	5.51342e-52	Bbig:G	Bbig	G	3.95652	vacuolar sorting protein 28, putative
Bdiv_023260c	1.76048e-65	1.23265	0.461	0.221	3.02275e-62	Bbov:SM	Bbov	SM	2.08597	membrane protein, putative
Bdiv_023270	8.49065e-39	3.10899	0.754	0.13	1.45785e-35	Bbov:MC	Bbov	MC	5.8	mitogen activated protein kinase, putative	TGGT1_233010	putative cell-cycle-assocaited protein kinase ERK7
Bdiv_023440	1.93849e-107	1.67453	0.324	0.069	3.32839e-104	Bbov:SM	Bbov	SM	4.69565	conserved hypothetical protein	TGGT1_313570	regulator of chromosome condensation (RCC1) repeat-containing protein
Bdiv_023470	5.84407e-155	2.59077	0.325	0.013	1.00343e-151	Bbig:C	Bbig	C	25	ubiquitin-conjugating enzyme, putative	TGGT1_235450	ubiquitin-conjugating enzyme subfamily protein
Bdiv_023670	5.16661e-80	1.38342	0.291	0.075	8.87107e-77	Bbov:SM	Bbov	SM	3.88	DNA mismatch repair protein, putative	TGGT1_266390	DNA mismatch repair protein, C-terminal domain-containing protein
Bdiv_023690c	2.28641e-60	1.27384	0.299	0.112	3.92576e-57	Bbig:G	Bbig	G	2.66964	hypothetical protein	TGGT1_288040	hypothetical protein
Bdiv_024000c	2.99109e-86	1.45483	0.492	0.22	5.1357e-83	Bbig:SM	Bbig	SM	2.23636	hypothetical protein	TGGT1_232040	hypothetical protein
Bdiv_024130	3.17026e-210	1.22698	0.914	0.58	5.44333e-207	Bbov:G	Bbov	G	1.57586	adenylate kinase 2	TGGT1_224900	putative adenylate kinase
Bdiv_024360	7.41305e-24	1.88704	0.935	0.389	1.27282e-20	Bbig:MC	Bbig	MC	2.4036	conserved hypothetical protein	TGGT1_301350	SNARE associated protein
Bdiv_024370c	2.39237e-116	1.13787	0.845	0.564	4.10769e-113	Bdiv_cow:SM	Bdiv_cow	SM	1.49823	hexose transporter	TGGT1_214320	facilitative glucose transporter GT1
Bdiv_024470c	9.49035e-246	2.26038	0.66	0.17	1.62949e-242	Bbig:SM	Bbig	SM	3.88235	nucleosome assembly protein	TGGT1_288630	putative nucleosome assembly protein (NAP)
Bdiv_024560c	2.9343e-222	1.28124	0.957	0.711	5.03819e-219	Bbig:SM	Bbig	SM	1.34599	translation elongation factor-1 beta subunit	TGGT1_226410	EF-1 guanine nucleotide exchange domain-containing protein
Bdiv_024580	3.69828e-36	1.19345	0.201	0.072	6.34995e-33	Bbig:SM	Bbig	SM	2.79167	DNA-directed RNA polymerase II large subunit, putative,DNA-directed RNA polymerase II large subunit, putative	TGGT1_232210	hypothetical protein
Bdiv_024650c	4.27709e-06	1.0966	0.522	0.298	0.00734376	Bbov:MC	Bbov	MC	1.75168	Putative GTP-ase activating protein for Arf	TGGT1_273070	putative GTPase activating protein for adp ribosylation factor
Bdiv_024660c	1.15843e-38	1.10049	0.453	0.235	1.98903e-35	Bbig:C	Bbig	C	1.92766	conserved hypothetical protein
Bdiv_025010	9.16247e-68	4.4797	0.797	0.045	1.5732e-64	Bbov:MC	Bbov	MC	17.7111	UDP-galactose transporter, putative	TGGT1_254580	UDP-galactose transporter family protein
Bdiv_025210	9.81729e-101	1.2835	0.472	0.176	1.68563e-97	Bbov:G	Bbov	G	2.68182	transmembrane CLPTM1 family protein	TGGT1_205240	cleft lip and palate transmembrane protein 1 (clptm1) protein
Bdiv_025230	7.73882e-83	1.08319	0.535	0.238	1.32876e-79	Bdiv_cow:SM	Bdiv_cow	SM	2.2479	DnaJ domain containing protein	TGGT1_259980	DnaJ domain-containing protein
Bdiv_025340c	2.27101e-19	1.67705	0.884	0.516	3.89933e-16	Bbov:MC	Bbov	MC	1.71318	hypothetical protein	TGGT1_253600	hypothetical protein
Bdiv_027200	0	2.10104	0.867	0.415	0	Bbig:G	Bbig	G	2.08916	conserved hypothetical protein	TGGT1_271810	putative lanp
Bdiv_027250	2.07387e-26	2.81003	0.551	0.095	3.56083e-23	Bbov:MC	Bbov	MC	5.8	endonuclease/exonuclease/phosphatase, putative	TGGT1_271120	endonuclease/exonuclease/phosphatase family protein
Bdiv_027330	8.02563e-238	1.83762	0.648	0.175	1.378e-234	Bbov:G	Bbov	G	3.70286	serine hydroxymethyltransferase, putative	TGGT1_234190	putative serine hydroxymethyltransferase 2
Bdiv_027460	4.19524e-84	1.40463	0.303	0.088	7.20323e-81	Bbig:G	Bbig	G	3.44318	conserved hypothetical protein	TGGT1_272770	hypothetical protein
Bdiv_027800	8.80887e-49	1.02047	0.393	0.202	1.51248e-45	Bbig:G	Bbig	G	1.94554	bromodomain protein, putative	TGGT1_264640	bromodomain-containing protein
Bdiv_027870	8.26252e-61	1.31371	0.322	0.131	1.41867e-57	Bbig:G	Bbig	G	2.45802	serine/threonin protein phosphatase, putative	TGGT1_251850	serine/threonine protein phosphatase
Bdiv_027900c	3.89269e-71	1.39521	0.387	0.154	6.68374e-68	Bbig:SM	Bbig	SM	2.51299	glycerol-3-phosphate-acyltransferase, putative	TGGT1_256980	glycerol-3-phosphate-acyltransferase
Bdiv_028030	1.20545e-271	2.2376	0.956	0.689	2.06975e-268	Bbov:C	Bbov	C	1.38752	membrane protein, putative
Bdiv_028150c	2.73407e-299	1.03559	0.995	0.968	4.6944e-296	Bbig:G	Bbig	G	1.02789	cyclophilin, putative	TGGT1_230520	putative cyclophilin 1
Bdiv_028430	5.75212e-41	1.09185	0.266	0.117	9.87638e-38	Bbig:G	Bbig	G	2.2735	MYND finger domain protein, putative	TGGT1_310850	MYND finger domain-containing protein
Bdiv_028640	5.40362e-74	1.11787	0.825	0.67	9.27802e-71	Bdiv_human:C	Bdiv_human	C	1.23134	conserved hypothetical protein
Bdiv_028820c	2.16419e-97	1.06066	0.41	0.137	3.71591e-94	Bdiv_cow:G	Bdiv_cow	G	2.9927	membrane protein, putative
Bdiv_028830c	4.25572e-81	1.45385	0.25	0.061	7.30708e-78	Bbig:G	Bbig	G	4.09836	DegP protease, putative	TGGT1_290840	serine protease
Bdiv_028840c	4.0833e-28	2.06859	0.661	0.099	7.01103e-25	Bbig:MC	Bbig	MC	6.67677	glutaredoxin-like protein, putative	TGGT1_279400	putative glutaredoxin
Bdiv_028900c	0	2.65752	0.899	0.312	0	Bbig:SM	Bbig	SM	2.88141	conserved, membrane protein, putative	TGGT1_310750	emp24/gp25L/p24 family protein
Bdiv_029480c	7.64927e-119	1.41822	0.441	0.119	1.31338e-115	Bdiv_cow:SM	Bdiv_cow	SM	3.70588	DHHC zinc finger domain containing protein	TGGT1_269150	DHHC zinc finger domain-containing protein
Bdiv_029700c	3.72252e-251	2.48677	0.436	0.054	6.39156e-248	Bbig:G	Bbig	G	8.07407	conserved hypothetical protein	TGGT1_312670	hypothetical protein
Bdiv_029730c	3.02554e-88	1.42607	0.42	0.091	5.19485e-85	Bdiv_cow:C	Bdiv_cow	C	4.61538	hypothetical protein	TGGT1_288270	hypothetical protein
Bdiv_029930c	2.35389e-56	1.23731	0.145	0.022	4.04163e-53	Bbov:SM	Bbov	SM	6.59091	conserved hypothetical protein	TGGT1_275430	hypothetical protein
Bdiv_029940	2.39995e-109	1.69368	0.359	0.102	4.12071e-106	Bbig:G	Bbig	G	3.51961	ATP-NAD-dependent kinase, putative	TGGT1_244700	NAD(+)/NADH kinase domain-containing protein
Bdiv_029960	8.99541e-71	1.23298	0.178	0.032	1.54451e-67	Bbov:G	Bbov	G	5.5625	conserved hypothetical protein	TGGT1_217900	hypothetical protein
Bdiv_030000	5.92709e-49	1.26113	0.256	0.098	1.01768e-45	Bbig:G	Bbig	G	2.61224	mitochondrial carrier protein, putative	TGGT1_248950	carrier superfamily protein
Bdiv_030420c	9.73066e-90	1.1488	0.52	0.21	1.67075e-86	Bdiv_cow:SM	Bdiv_cow	SM	2.47619	predicted protein,predicted protein	TGGT1_314770	tRNA (guanine-N1)-methyltransferase
Bdiv_030490c	6.51362e-64	1.87093	0.143	0.007	1.11839e-60	Bbov:C	Bbov	C	20.4286	hypothetical protein	TGGT1_312970	hypothetical protein
Bdiv_030500	2.95472e-91	4.49814	0.839	0.01	5.07326e-88	Bbig:MC	Bbig	MC	83.9	mannosyltransferase (PIG-M) containing domain	TGGT1_310100	mannosyltransferase (pig-m) protein
Bdiv_030600c	9.75555e-82	1.42229	0.314	0.088	1.67503e-78	Bbov:SM	Bbov	SM	3.56818	Mitochondrial ribosomal protein L37, related	TGGT1_201830	ribosomal protein L37
Bdiv_030660	0	2.05286	0.771	0.16	0	Bdiv_cow:SM	Bdiv_cow	SM	4.81875	dihydrofolate reductase/thymidylate synthase	TGGT1_249180	bifunctional dihydrofolate reductase-thymidylate synthase
Bdiv_030700c	1.01333e-17	1.15444	0.187	0.082	1.73988e-14	Bdiv_human:SM	Bdiv_human	SM	2.28049	hypothetical protein	TGGT1_216250	RecF/RecN/SMC N terminal domain-containing protein
Bdiv_030780	1.32532e-265	1.34695	0.98	0.744	2.27557e-262	Bbig:SM	Bbig	SM	1.3172	Elongation factor 1 gamma, conserved domain- containing protein	TGGT1_300140	putative elongation factor 1-gamma
Bdiv_030820c	4.91373e-79	1.53493	0.27	0.076	8.43688e-76	Bbig:G	Bbig	G	3.55263	hypothetical protein	TGGT1_281380	hypothetical protein
Bdiv_030860	1.76082e-98	1.96173	0.351	0.061	3.02332e-95	Bbig:C	Bbig	C	5.7541	hypothetical protein	TGGT1_249480	tetratricopeptide repeat-containing protein
Bdiv_030890	1.16626e-31	2.81682	0.899	0.366	2.00246e-28	Bbov:MC	Bbov	MC	2.45628	Metacaspase-1	TGGT1_278975	ICE family protease (caspase) p20 domain-containing protein
Bdiv_030970	3.54311e-131	1.65525	0.387	0.094	6.08353e-128	Bbov:G	Bbov	G	4.11702	lysyl-tRNA synthetase, putative
Bdiv_031200c	9.24011e-16	1.3949	0.913	0.673	1.58653e-12	Bbov:MC	Bbov	MC	1.35661	conserved hypothetical protein	TGGT1_231630	alveolin domain containing intermediate filament IMC4
Bdiv_031730c	2.50901e-35	2.29712	1	0.984	4.30797e-32	Bbig:MC	Bbig	MC	1.01626	membrane protein, putative	TGGT1_205330	hypothetical protein
Bdiv_032180c	2.25945e-75	4.83442	0.681	0.006	3.87947e-72	Bbov:MC	Bbov	MC	113.5	hypothetical protein
Bdiv_032350	2.76923e-65	1.63933	0.262	0.078	4.75476e-62	Bbov:SM	Bbov	SM	3.35897	conserved hypothetical protein	TGGT1_254780	hypothetical protein
Bdiv_032670c	9.41285e-55	1.17689	0.263	0.087	1.61619e-51	Bbov:SM	Bbov	SM	3.02299	hypothetical protein	TGGT1_253360	hypothetical protein
Bdiv_033040c	7.7427e-151	2.04055	0.456	0.116	1.32942e-147	Bbig:SM	Bbig	SM	3.93103	Dcp1-like decapping family protein
Bdiv_033380	2.16579e-18	2.77526	0.333	0.041	3.71867e-15	Bbov:MC	Bbov	MC	8.12195	hypothetical protein	TGGT1_203620	hypothetical protein
Bdiv_033400	5.03388e-111	1.73742	0.577	0.188	8.64318e-108	Bbig:C	Bbig	C	3.06915	dehydrogenase E1 component family protein	TGGT1_239490	dehydrogenase E1 component family protein
Bdiv_033440	2.29951e-22	1.08401	0.277	0.133	3.94826e-19	Bdiv_human:SM	Bdiv_human	SM	2.08271	hypothetical protein
Bdiv_033630	4.54515e-50	3.22404	0.581	0.022	7.80402e-47	Bbig:MC	Bbig	MC	26.4091	conserved hypothetical protein	TGGT1_223510	hypothetical protein
Bdiv_033720	2.16223e-211	1.05487	0.987	0.862	3.71255e-208	Bbig:SM	Bbig	SM	1.14501	heat shock protein 70 precursor, putative	TGGT1_311720	chaperonin protein BiP
Bdiv_033730	0	1.99427	0.926	0.48	0	Bbov:G	Bbov	G	1.92917	casein kinase II, alpha chain (CK II)	TGGT1_263070	CMGC kinase, CK2 family
Bdiv_033910c	4.22244e-288	2.8231	0.571	0.086	7.24993e-285	Bbig:SM	Bbig	SM	6.63953	membrane protein, putative	TGGT1_235660	hypothetical protein
Bdiv_033930c	1.58401e-105	1.48561	0.34	0.085	2.71975e-102	Bbov:G	Bbov	G	4	hypothetical protein	TGGT1_213690	ring box protein 1 family protein
Bdiv_033980	1.98938e-172	1.2807	0.946	0.733	3.41576e-169	Bbov:SM	Bbov	SM	1.29059	core histone H2A/H2B/H3/H4 family protein	TGGT1_239260	histone H4
Bdiv_033990c	3.06434e-14	1.52485	0.783	0.436	5.26148e-11	Bbov:MC	Bbov	MC	1.79587	protein kinase domain containing protein	TGGT1_239420	protein kinase
Bdiv_034020c	5.37787e-31	1.92605	1	0.586	9.23381e-28	Bbig:MC	Bbig	MC	1.70648	membrane-associated calcum-binding protein, putative	TGGT1_229480	putative calcium binding protein precursor
Bdiv_034130c	1.91262e-86	1.29095	0.496	0.228	3.28396e-83	Bbig:G	Bbig	G	2.17544	heat shock protein 90
Bdiv_034270c	9.84264e-75	1.05443	0.586	0.337	1.68998e-71	Bbig:G	Bbig	G	1.73887	isocitrate dehydrogenase, NADP-dependent family protein	TGGT1_266760	isocitrate dehydrogenase
Bdiv_034310c	0	3.02459	0.965	0.296	0	Bbov:C	Bbov	C	3.26014	acetyltransferase, GNAT family protein	TGGT1_289900	n-acetyltransferase family protein
Bdiv_034350c	1.95441e-144	1.76995	0.441	0.105	3.35571e-141	Bbov:SM	Bbov	SM	4.2	conserved hypothetical protein	TGGT1_258410	photosensitized INA-labeled protein PHIL1
Bdiv_034460	3.84983e-142	2.22739	0.413	0.052	6.61015e-139	Bbig:C	Bbig	C	7.94231	nucleolar protein,Nop52 family protein	TGGT1_224970	nucleolar protein
Bdiv_035090	6.6166e-110	1.56001	0.542	0.231	1.13607e-106	Bbig:SM	Bbig	SM	2.34632	membrane protein, putative	TGGT1_289800	hypothetical protein
Bdiv_035230	4.16736e-204	2.14353	0.558	0.137	7.15536e-201	Bbov:SM	Bbov	SM	4.07299	hypothetical protein
Bdiv_035350c	4.36253e-148	1.66413	0.661	0.296	7.49047e-145	Bbig:SM	Bbig	SM	2.23311	conserved hypothetical protein	TGGT1_209950	putative thioredoxin
Bdiv_035490	6.88306e-28	1.08677	0.125	0.037	1.18182e-24	Bbig:SM	Bbig	SM	3.37838	hypothetical protein	TGGT1_231800	putative helicase
Bdiv_035870	3.8937e-175	1.5797	0.698	0.334	6.68549e-172	Bbig:G	Bbig	G	2.08982	hypothetical protein	TGGT1_248460	putative ubiquitin
Bdiv_036040c	5.79729e-39	1.02938	0.228	0.091	9.95395e-36	Bbig:G	Bbig	G	2.50549	metal-binding domain in RNase L inhibitor, RLI family protein	TGGT1_204540	DUF367 domain-containing protein
Bdiv_036080c	9.10804e-76	1.39035	0.267	0.075	1.56385e-72	Bbig:G	Bbig	G	3.56	hypothetical protein	TGGT1_239930	putative beta-catenin family protein 1
Bdiv_036280c	1.69387e-86	1.1122	0.357	0.119	2.90837e-83	Bdiv_cow:G	Bdiv_cow	G	3	conserved hypothetical protein	TGGT1_305020	hypothetical protein
Bdiv_036290	6.7709e-83	1.03442	0.589	0.277	1.16256e-79	Bdiv_cow:SM	Bdiv_cow	SM	2.12635	hypothetical protein	TGGT1_320580	hypothetical protein
Bdiv_036410	4.39662e-51	1.13066	0.315	0.138	7.54899e-48	Bbig:G	Bbig	G	2.28261	transporter, major facilitator family	TGGT1_253700	transporter, major facilitator family protein
Bdiv_036430	1.67649e-218	2.12915	0.877	0.423	2.87853e-215	Bbig:C	Bbig	C	2.07329	membrane protein, putative	TGGT1_224205	putative ER lumen protein retaining receptor
Bdiv_036520	5.3632e-80	1.78418	0.198	0.029	9.20862e-77	Bbov:SM	Bbov	SM	6.82759	eukaryotic aspartyl protease family protein	TGGT1_262940	putative aspartyl proteinase (eimepsin)
Bdiv_036720c	2.30024e-06	1.25016	0.355	0.13	0.00394951	Bbig:MC	Bbig	MC	2.73077	SNARE domain containing protein
Bdiv_036750c	2.83341e-16	2.07247	0.623	0.228	4.86497e-13	Bbov:MC	Bbov	MC	2.73246	conserved hypothetical protein	TGGT1_315160	hypothetical protein
Bdiv_037020c	1.21194e-168	2.51076	0.433	0.043	2.08089e-165	Bbig:C	Bbig	C	10.0698	Dullard-like phosphatase domain containing protein	TGGT1_310660	Dullard family phosphatase domain-containing protein
Bdiv_037090c	3.10501e-64	1.09608	0.572	0.362	5.3313e-61	Bbig:G	Bbig	G	1.58011	conserved hypothetical protein	TGGT1_312400	putative exosomal 3'-5' exoribonuclease complex subunit
Bdiv_037140	9.9597e-97	1.25396	0.436	0.14	1.71008e-93	Bdiv_cow:SM	Bdiv_cow	SM	3.11429	SCO1/SenC family protein	TGGT1_257440	SCO1/SenC protein
Bdiv_037320c	1.54113e-17	2.36688	0.468	0.089	2.64613e-14	Bbig:MC	Bbig	MC	5.25843	hypothetical protein
Bdiv_037500	1.66592e-18	2.38119	0.348	0.045	2.86038e-15	Bbov:MC	Bbov	MC	7.73333	hypothetical protein	TGGT1_263240	hypothetical protein
Bdiv_037690c	1.53176e-19	1.80148	0.726	0.203	2.63004e-16	Bbig:MC	Bbig	MC	3.57635	diacylglycerol kinase, putative	TGGT1_202460	diacylglycerol kinase accessory domain (presumed) domain-containing protein
Bdiv_037770	1.07762e-99	1.868	0.313	0.073	1.85028e-96	Bbov:SM	Bbov	SM	4.28767	FHA domain containing protein	TGGT1_208310	hypothetical protein
Bdiv_037820	5.43371e-78	1.20506	0.277	0.067	9.32968e-75	Bdiv_cow:SM	Bdiv_cow	SM	4.13433	ABC transporter family protein	TGGT1_269000	ABC transporter family protein
Bdiv_038040c	1.50984e-83	1.45973	0.329	0.107	2.5924e-80	Bbig:G	Bbig	G	3.07477	mitochondrial carrier protein family protein	TGGT1_274060	2-oxoglutarate/malate translocase OMT
Bdiv_038170	1.57919e-100	1.61135	0.452	0.164	2.71147e-97	Bbig:SM	Bbig	SM	2.7561	SRP54-type protein, GTPase domain containing protein	TGGT1_280610	signal recognition particle receptor alpha subunit
Bdiv_038180c	0	3.42625	0.85	0.139	0	Bbov:G	Bbov	G	6.11511	nucleoside diphosphate kinase family protein	TGGT1_295350	putative nucleoside diphosphate kinase
Bdiv_038210	1.34083e-131	2.02046	0.328	0.055	2.3022e-128	Bbig:SM	Bbig	SM	5.96364	clathrin adaptor complex small chain family protein
Bdiv_038320	4.67399e-28	2.08048	0.942	0.817	8.02523e-25	Bbov:MC	Bbov	MC	1.153	hypothetical protein	TGGT1_267300	hypothetical protein
Bdiv_038560c	3.08073e-125	1.38126	0.528	0.19	5.28962e-122	Bbov:G	Bbov	G	2.77895	conserved hypothetical protein	TGGT1_227970	histone family DNA-binding protein
Bdiv_038660	6.46596e-13	1.01768	0.27	0.161	1.11021e-09	Bdiv_human:SM	Bdiv_human	SM	1.67702	conserved hypothetical protein	TGGT1_312660	hypothetical protein
Bdiv_038950c	1.1231e-99	1.82216	0.319	0.076	1.92836e-96	Bbig:SM	Bbig	SM	4.19737	ribose 5-phosphate isomerase A family protein	TGGT1_239310	ribulose 5-phosphate isomerase
Bdiv_038960	3.68127e-78	1.59116	0.34	0.111	6.32074e-75	Bbig:SM	Bbig	SM	3.06306	hypothetical protein	TGGT1_269060	hypothetical protein
Bdiv_038990c	9.37406e-07	1.43175	0.274	0.077	0.00160953	Bbig:MC	Bbig	MC	3.55844	DHHC zinc finger domain containing protein
Bdiv_039280c	2.13236e-166	1.56041	0.91	0.444	3.66127e-163	Bdiv_human:C	Bdiv_human	C	2.04955	ATPase associated with various cellular activities (AAA) family protein	TGGT1_242625	ATPase family associated with various cellular activities (AAA) subfamily protein
Bdiv_039410c	8.08189e-23	2.54084	0.739	0.286	1.38766e-19	Bbov:MC	Bbov	MC	2.58392	hypothetical protein
Bdiv_039470	1.17256e-36	1.07017	0.26	0.111	2.01329e-33	Bbig:SM	Bbig	SM	2.34234	hypothetical protein	TGGT1_249880	hypothetical protein
Bdiv_039600	5.03691e-65	1.14229	0.385	0.157	8.64837e-62	Bbov:SM	Bbov	SM	2.45223	hypothetical protein
Bdiv_039610c	1.43824e-59	1.15001	0.265	0.078	2.46946e-56	Bdiv_cow:SM	Bdiv_cow	SM	3.39744	3-oxo-5-alpha-steroid 4-dehydrogenase family protein	TGGT1_285240	3-oxo-5-alpha-steroid 4-dehydrogenase
Bdiv_039890c	7.76561e-107	1.27987	0.47	0.148	1.33336e-103	Bdiv_cow:SM	Bdiv_cow	SM	3.17568	regulator of chromosome condensation (RCC1) domain containing protein	TGGT1_213900	regulator of chromosome condensation RCC1
Bdiv_039920	1.19119e-68	1.18904	0.454	0.195	2.04528e-65	Bbig:SM	Bbig	SM	2.32821	hypothetical protein
Bdiv_040280	7.61536e-87	1.52417	0.203	0.027	1.30756e-83	Bdiv_cow:SM	Bdiv_cow	SM	7.51852	hypothetical protein	TGGT1_311750	mago binding protein
Bdiv_040320	0	2.61567	0.651	0.123	0	Bbov:SM	Bbov	SM	5.29268	conserved hypothetical protein	TGGT1_204370	WD-40 repeat protein
Bdiv_040360	1.31748e-37	1.74579	0.63	0.477	2.26212e-34	Bbov:SM	Bbov	SM	1.32075	conserved hypothetical protein	TGGT1_265420	hypothetical protein
Bdiv_040430c	2.95642e-169	1.51562	0.613	0.184	5.07617e-166	Bdiv_cow:SM	Bdiv_cow	SM	3.33152	FAD-dependent glycerol-3-phosphate dehydrogenase, putative	TGGT1_263730	FAD-dependent glycerol-3-phosphate dehydrogenase
Bdiv_040460	0	2.71973	0.783	0.171	0	Bbov:G	Bbov	G	4.57895	membrane protein, putative
Bdiv_040500	6.58715e-65	1.45116	0.472	0.251	1.13101e-61	Bbov:SM	Bbov	SM	1.88048	conserved hypothetical protein
Bdiv_040540	2.3641e-195	1.83532	0.868	0.406	4.05916e-192	Bbig:C	Bbig	C	2.13793	hypothetical protein

## Sheet: Bdiv_human vs Bdiv_cow
GeneID	p_val	avg_log2FC	pct.1	pct.2	p_val_adj	ref	ref.spp	phase	pct.ratio	ProductDescriptionBdiv	GeneID_Toxo	ProductDescriptionToxo
Bdiv_002410c	9.66316e-97	1.02897	0.982	0.82	1.65916e-93	Bdiv_cow:C	Bdiv_cow	C	1.19756	hypothetical protein	TGGT1_318610	AP2 domain transcription factor AP2IV-3
Bdiv_002520c	1.37812e-15	0.604752	0.684	0.432	2.36623e-12	Bdiv_cow:C	Bdiv_cow	C	1.58333	hypothetical protein
Bdiv_004710	1.78331e-45	0.862203	0.899	0.531	3.06194e-42	Bdiv_cow:C	Bdiv_cow	C	1.69303	hypothetical protein
Bdiv_005180c	8.71393e-27	0.876673	0.336	0.12	1.49618e-23	Bdiv_cow:G	Bdiv_cow	G	2.8	ribonucleoside-diphosphate reductase beta subunit, putative
Bdiv_005340	2.30318e-12	0.679145	0.265	0.116	3.95456e-09	Bdiv_cow:SM	Bdiv_cow	SM	2.28448	hypothetical protein
Bdiv_005460c	1.43775e-18	0.934425	0.946	0.758	2.46862e-15	Bdiv_cow:MC	Bdiv_cow	MC	1.24802	histone H2B.1, putative	TGGT1_209910	histone H2Bv
Bdiv_006490c	1.02775e-48	1.02562	0.849	0.785	1.76465e-45	Bdiv_human:C	Bdiv_human	C	1.08153	aspartyl protease, putative	TGGT1_246550	aspartyl protease ASP3
Bdiv_007750c	1.12206e-19	0.72304	0.557	0.315	1.92659e-16	Bdiv_cow:SM	Bdiv_cow	SM	1.76825	formate/nitrite transporter family protein, putative	TGGT1_229170	formate/nitrite transporter protein
Bdiv_013030c	1.79093e-22	0.804955	0.506	0.246	3.07503e-19	Bdiv_cow:SM	Bdiv_cow	SM	2.05691	conserved hypothetical protein	TGGT1_216460	hypothetical protein
Bdiv_014020c	2.30339e-38	1.00987	0.421	0.139	3.95493e-35	Bdiv_cow:G	Bdiv_cow	G	3.02878	chaperonin, 10 kDa domain containing protein	TGGT1_263530	putative chaperonin
Bdiv_016020	3.17973e-12	0.593141	0.289	0.133	5.4596e-09	Bdiv_cow:SM	Bdiv_cow	SM	2.17293	hypothetical protein	TGGT1_275680	hypothetical protein
Bdiv_016060	5.54913e-06	0.688731	0.541	0.286	0.00952785	Bdiv_cow:MC	Bdiv_cow	MC	1.89161	hypothetical protein	TGGT1_208340	hypothetical protein
Bdiv_016220	3.13833e-24	0.621691	0.481	0.23	5.3885e-21	Bdiv_cow:G	Bdiv_cow	G	2.0913	thioredoxin domain containing protein
Bdiv_016990c	1.38166e-07	0.786414	0.599	0.291	0.000237232	Bdiv_cow:MC	Bdiv_cow	MC	2.05842	conserved hypothetical protein	TGGT1_209890	hypothetical protein
Bdiv_017140	2.02506e-39	0.902573	0.758	0.436	3.47703e-36	Bdiv_cow:SM	Bdiv_cow	SM	1.73853	conserved hypothetical protein	TGGT1_260500	putative COPI associated protein
Bdiv_017290	2.61538e-15	0.640071	0.206	0.075	4.49061e-12	Bdiv_cow:G	Bdiv_cow	G	2.74667	ubiquitin family protein
Bdiv_019100c	2.80581e-26	0.755138	0.447	0.203	4.81758e-23	Bdiv_cow:G	Bdiv_cow	G	2.20197	U3 small nucleolar ribonucleoprotein protein IMP3-like protein	TGGT1_209430	putative 40S ribosomal protein S4
Bdiv_019130	1.21514e-24	0.818328	0.28	0.093	2.08639e-21	Bdiv_cow:G	Bdiv_cow	G	3.01075	replication factor C subunit 4	TGGT1_210960	putative replication factor C subunit 4
Bdiv_020970	4.08975e-06	0.807283	0.659	0.558	0.0070221	Bdiv_human:MC	Bdiv_human	MC	1.181	choline/ethanolamine kinase, putative	TGGT1_306540	phosphotransferase enzyme family protein
Bdiv_024970c	9.50816e-13	0.849079	0.2	0.069	1.63255e-09	Bdiv_cow:SM	Bdiv_cow	SM	2.89855	orotidine 5'-phosphate decarboxylase, putative	TGGT1_259690	orotidine-5-phosphate decarboxylase/orotate phosphoribosyltransferase
Bdiv_029960	4.85035e-08	0.696302	0.154	0.064	8.32805e-05	Bdiv_cow:SM	Bdiv_cow	SM	2.40625	conserved hypothetical protein	TGGT1_217900	hypothetical protein
Bdiv_030460	2.17441e-14	0.627592	0.233	0.099	3.73346e-11	Bdiv_cow:G	Bdiv_cow	G	2.35354	transcription factor S-II protein, putative	TGGT1_312250	DNA-directed RNA polymerase III RPC11
Bdiv_038490	1.56957e-08	0.804465	0.682	0.346	2.69494e-05	Bdiv_cow:MC	Bdiv_cow	MC	1.9711	tubulin alpha chain, putative	TGGT1_316400B	alpha tubulin TUBA1
Bdiv_039000c	1.04718e-16	0.667004	0.274	0.119	1.79801e-13	Bdiv_cow:G	Bdiv_cow	G	2.30252	ubiquitin family protein	TGGT1_258720	putative Ubiquitin family protein
Bdiv_039600	8.18365e-10	0.634547	0.25	0.125	1.40513e-06	Bdiv_cow:SM	Bdiv_cow	SM	2	hypothetical protein
Bdiv_039610c	1.26708e-09	0.593209	0.265	0.133	2.17558e-06	Bdiv_cow:SM	Bdiv_cow	SM	1.99248	3-oxo-5-alpha-steroid 4-dehydrogenase family protein	TGGT1_285240	3-oxo-5-alpha-steroid 4-dehydrogenase
Bdiv_040280	1.12247e-17	1.13273	0.203	0.049	1.92729e-14	Bdiv_cow:SM	Bdiv_cow	SM	4.14286	hypothetical protein	TGGT1_311750	mago binding protein
Bdiv_040540	5.51702e-25	0.830762	0.665	0.366	9.47272e-22	Bdiv_cow:C	Bdiv_cow	C	1.81694	hypothetical protein

## Sheet: cow_vs_human
GeneID	p_val	avg_log2FC	pct.1	pct.2	p_val_adj	ref	ref.host	phase	gene	pct.ratio	ProductDescriptionBdiv	GeneID_Toxo	ProductDescriptionToxo
Bdiv_000300	8.0012e-18	1.02517	0.201	0.054	1.37381e-14	cow:SM	cow	SM	Bdiv-000300	3.72222	conserved hypothetical protein
Bdiv_000390c	7.19139e-16	0.733496	0.368	0.195	1.23476e-12	cow:SM	cow	SM	Bdiv-000390c	1.88718	sortilin, putative	TGGT1_290160	putative sortilin
Bdiv_000590	3.36481e-10	0.652518	0.269	0.149	5.77738e-07	cow:SM	cow	SM	Bdiv-000590	1.80537	fumarate hydratase, putative	TGGT1_267330	fumarate hydratase
Bdiv_000840c	9.90185e-47	1.03994	0.541	0.243	1.70015e-43	cow:G	cow	G	Bdiv-000840c	2.22634	4-methyl-5(B-hydroxyethyl)-thiazol monophosphate biosynthesis enzyme, putative	TGGT1_214290	DJ-1 family protein
Bdiv_000950	3.81451e-13	2.38887	0.357	0.066	6.54952e-10	cow:MC	cow	MC	Bdiv-000950	5.40909	thiodoxin reductase, putative	TGGT1_309730	thioredoxin reductase
Bdiv_001120c	1.15897e-74	1.92381	0.679	0.359	1.98996e-71	cow:C	cow	C	Bdiv-001120c	1.89136	conserved hypothetical protein	TGGT1_237000	putative polyphosphoinositide binding protein
Bdiv_001220	3.10787e-10	0.73387	0.344	0.24	5.33621e-07	human:SM	human	SM	Bdiv-001220	1.43333	conserved hypothetical protein	TGGT1_261440	ARM repeats containing protein
Bdiv_001420c	8.14685e-34	1.48237	0.233	0.043	1.39881e-30	cow:G	cow	G	Bdiv-001420c	5.4186	base excision DNA repair protein, HhH-GPD family domain containing protein,hypothetical protein	TGGT1_305920	endonuclease III family 1 protein
Bdiv_001550	2.85856e-12	0.716315	0.432	0.305	4.90815e-09	cow:SM	cow	SM	Bdiv-001550	1.41639	conserved hypothetical protein	TGGT1_310030	putative cyclase-associated protein
Bdiv_001800c	3.59471e-35	1.77837	0.211	0.022	6.17213e-32	cow:C	cow	C	Bdiv-001800c	9.59091	endonuclease/exonuclease/phosphatase family domain containing protein	TGGT1_204410	endonuclease/exonuclease/phosphatase family protein
Bdiv_001970c	1.18922e-70	4.06821	0.324	0.01	2.04189e-67	cow:C	cow	C	Bdiv-001970c	32.4	thioredoxin, putative
Bdiv_002070	1.24776e-06	0.727459	0.174	0.11	0.0021424	human:SM	human	SM	Bdiv-002070	1.58182	hypothetical protein	TGGT1_312065	hypothetical protein
Bdiv_002160	8.86573e-13	3.72415	0.383	0.099	1.52225e-09	cow:MC	cow	MC	Bdiv-002160	3.86869	nucleotide-binding protein 1, putative	TGGT1_280730	putative cytosolic fe-s cluster assembling factor nbp35
Bdiv_002410c	2.38092e-54	0.835958	0.895	0.82	4.08804e-51	cow:C	cow	C	Bdiv-002410c	1.09146	hypothetical protein	TGGT1_318610	AP2 domain transcription factor AP2IV-3
Bdiv_002420	4.23088e-51	0.829845	0.864	0.729	7.26443e-48	human:C	human	C	Bdiv-002420	1.18519	gliding-associated protein 45, putative	TGGT1_223940	GAP45 protein
Bdiv_002520c	1.42852e-22	1.12498	0.453	0.244	2.45277e-19	cow:SM	cow	SM	Bdiv-002520c	1.85656	hypothetical protein
Bdiv_002540c	1.5956e-17	0.853565	0.382	0.234	2.73965e-14	human:SM	human	SM	Bdiv-002540c	1.63248	subunit of proteaseome activator complex, putative	TGGT1_251760	putative subunit of proteaseome activator complex
Bdiv_002570c	2.42979e-09	0.600165	0.425	0.366	4.17194e-06	human:G	human	G	Bdiv-002570c	1.1612	single-strand binding protein, putative
Bdiv_002590	9.38728e-25	1.063	0.365	0.156	1.6118e-21	cow:SM	cow	SM	Bdiv-002590	2.33974	ADP-ribosylation factor, putative
Bdiv_002620	1.66884e-10	0.805153	0.174	0.092	2.8654e-07	human:SM	human	SM	Bdiv-002620	1.8913	myb-like DNA-binding domain containing protein	TGGT1_264120	Myb family DNA-binding domain-containing protein
Bdiv_002780c	2.3469e-47	2.11137	0.429	0.136	4.02962e-44	cow:SM	cow	SM	Bdiv-002780c	3.15441	Copper transporter 1, putative	TGGT1_262710	Ctr copper transporter family protein
Bdiv_002840c	6.03713e-19	0.956632	0.3	0.139	1.03658e-15	cow:C	cow	C	Bdiv-002840c	2.15827	cell cycle regulator protein, putative	TGGT1_221490	cell cycle regulator protein
Bdiv_003120	9.95936e-12	0.78344	0.246	0.159	1.71002e-08	human:G	human	G	Bdiv-003120	1.54717	hypothetical protein	TGGT1_308930	putative 50S ribosomal protein L33
Bdiv_003260	1.05065e-20	1.02862	0.333	0.183	1.80397e-17	human:SM	human	SM	Bdiv-003260	1.81967	DHHC zinc finger domain containing protein	TGGT1_301370	DHHC zinc finger domain-containing protein
Bdiv_003360	5.69744e-14	0.812436	0.136	0.041	9.78251e-11	cow:G	cow	G	Bdiv-003360	3.31707	suppressor Mra1 family domain containing protein	TGGT1_313980	putative ribosome biogenesis protein nep1
Bdiv_003390	3.84184e-22	1.17618	0.162	0.031	6.59644e-19	cow:G	cow	G	Bdiv-003390	5.22581	transcription factor S-II (TFIIS)and transcription factor S-II (TFIIS) central domain containing protein	TGGT1_293670	transcription elongation factor A TFIIS
Bdiv_003590c	9.44182e-08	0.666474	0.169	0.098	0.000162116	human:SM	human	SM	Bdiv-003590c	1.72449	hypothetical protein	TGGT1_320070	CDK-activating kinase assembly factor MAT1 protein
Bdiv_003840c	4.3914e-11	0.800695	0.336	0.23	7.54004e-08	human:SM	human	SM	Bdiv-003840c	1.46087	ubiquitin fusion degradation protein, putative	TGGT1_270530	ubiquitin fusion degradation protein UFD1CY
Bdiv_004360	2.85136e-07	0.597937	0.376	0.317	0.000489579	human:G	human	G	Bdiv-004360	1.18612	Mitochondrial carrier protein, putative	TGGT1_277090	carrier superfamily protein
Bdiv_004450	1.41785e-09	0.791528	0.223	0.116	2.43445e-06	cow:SM	cow	SM	Bdiv-004450	1.92241	conserved hypothetical protein	TGGT1_223480	sushi domain (scr repeat) domain-containing protein
Bdiv_004630	1.15161e-15	0.713732	0.206	0.082	1.97731e-12	cow:G	cow	G	Bdiv-004630	2.5122	splicing factor 3a, subunit 2, putative	TGGT1_228000	putative splicing factor 3A subunit 2
Bdiv_004730	5.70636e-19	0.667872	0.499	0.298	9.79781e-16	cow:SM	cow	SM	Bdiv-004730	1.6745	conserved hypothetical protein	TGGT1_244350	DnaJ domain-containing protein
Bdiv_004990	6.6184e-10	0.659053	0.126	0.05	1.13638e-06	cow:G	cow	G	Bdiv-004990	2.52	conserved hypothetical protein	TGGT1_304900	hypothetical protein
Bdiv_005000c	8.36194e-08	0.900579	0.568	0.291	0.000143575	cow:MC	cow	MC	Bdiv-005000c	1.95189	hypothetical protein	TGGT1_265180	hypothetical protein
Bdiv_005130c	8.06122e-15	0.738868	0.183	0.069	1.38411e-11	cow:G	cow	G	Bdiv-005130c	2.65217	conserved hypothetical protein	TGGT1_204120	hypothetical protein
Bdiv_005150	2.24615e-17	0.952301	0.436	0.301	3.85663e-14	human:SM	human	SM	Bdiv-005150	1.4485	lipoate-protein ligase A, putative	TGGT1_271820	lipoyltransferase and lipoate-protein ligase subfamily protein
Bdiv_005170	3.85234e-16	0.753287	0.476	0.308	6.61448e-13	cow:SM	cow	SM	Bdiv-005170	1.54545	conserved hypothetical protein	TGGT1_237250	hypothetical protein
Bdiv_005180c	2.44578e-31	1.00471	0.336	0.12	4.19941e-28	cow:G	cow	G	Bdiv-005180c	2.8	ribonucleoside-diphosphate reductase beta subunit, putative
Bdiv_005210c	4.63846e-21	1.18405	0.22	0.054	7.96423e-18	cow:SM	cow	SM	Bdiv-005210c	4.07407	3'5'-cyclic nucleotide phosphodiesterase, putative	TGGT1_202540	3'5'-cyclic nucleotide phosphodiesterase domain-containing protein
Bdiv_005370c	1.02053e-27	1.25374	0.237	0.067	1.75226e-24	cow:G	cow	G	Bdiv-005370c	3.53731	conserved hypothetical protein	TGGT1_256780	hypothetical protein
Bdiv_005380c	2.3605e-112	3.02389	0.606	0.123	4.05298e-109	cow:SM	cow	SM	Bdiv-005380c	4.92683	single stranded G-strand telomeric DNA-binding protein, putative	TGGT1_262620	RNA recognition motif-containing protein
Bdiv_005460c	2.42831e-16	1.272	0.893	0.758	4.16941e-13	cow:MC	cow	MC	Bdiv-005460c	1.1781	histone H2B.1, putative	TGGT1_209910	histone H2Bv
Bdiv_005470	2.3263e-48	1.12591	0.527	0.229	3.99426e-45	cow:G	cow	G	Bdiv-005470	2.30131	splicing factor, arginine/serine-rich 3, putative	TGGT1_211420	RNA recognition motif-containing protein
Bdiv_005700c	3.47448e-10	0.58735	0.125	0.047	5.96568e-07	cow:G	cow	G	Bdiv-005700c	2.65957	minichromosome maintenance protein 3, putative	TGGT1_216730	MCM2/3/5 family protein
Bdiv_005720c	5.68633e-32	1.53993	0.32	0.085	9.76342e-29	cow:SM	cow	SM	Bdiv-005720c	3.76471	conserved hypothetical protein	TGGT1_231130	hypothetical protein
Bdiv_006130c	1.447e-06	1.78493	0.118	0	0.0024845	cow:MC	cow	MC	Bdiv-006130c		GTPase activator protein, putative	TGGT1_203910	TBC domain-containing protein
Bdiv_006190c	1.11327e-06	0.671195	0.12	0.072	0.00191148	human:G	human	G	Bdiv-006190c	1.66667	conserved hypothetical portein	TGGT1_272210	hypothetical protein
Bdiv_006490c	3.13573e-64	0.86768	0.849	0.674	5.38404e-61	human:C	human	C	Bdiv-006490c	1.25964	aspartyl protease, putative	TGGT1_246550	aspartyl protease ASP3
Bdiv_007600	4.01792e-34	1.53058	0.27	0.061	6.89876e-31	cow:C	cow	C	Bdiv-007600	4.42623	hexokinase	TGGT1_265450	hexokinase
Bdiv_007730c	1.57566e-06	1.12191	0.434	0.231	0.00270541	cow:MC	cow	MC	Bdiv-007730c	1.87879	Bax inhibitor-1, putative	TGGT1_255900	putative Bax inhibitor-1
Bdiv_007780	2.42615e-19	1.39818	0.141	0.011	4.16569e-16	cow:SM	cow	SM	Bdiv-007780	12.8182	conserved hypothetical protein	TGGT1_219300	ran binding protein
Bdiv_008170c	3.50755e-06	0.611712	0.115	0.052	0.00602247	cow:SM	cow	SM	Bdiv-008170c	2.21154	preprocathepsin c precursor, putative	TGGT1_267490	putative preprocathepsin c precursor
Bdiv_008590	1.57348e-18	0.720028	0.263	0.111	2.70167e-15	cow:G	cow	G	Bdiv-008590	2.36937	membrane protein, putative
Bdiv_008880c	2.57095e-21	0.803131	0.325	0.153	4.41432e-18	cow:G	cow	G	Bdiv-008880c	2.12418	leucine aminopeptidase, putative	TGGT1_290670	leucyl aminopeptidase LAP
Bdiv_009030	5.11305e-08	0.580716	0.188	0.095	8.77911e-05	cow:SM	cow	SM	Bdiv-009030	1.97895	Repressor of RNA polymerase III transcription MAF1, putative	TGGT1_248110	hypothetical protein
Bdiv_009600c	8.53167e-14	0.784815	0.297	0.151	1.46489e-10	cow:SM	cow	SM	Bdiv-009600c	1.96689	adaptin N terminal region family protein	TGGT1_313670	adaptin n terminal region domain-containing protein
Bdiv_009770	5.69606e-09	0.624267	0.191	0.092	9.78014e-06	cow:SM	cow	SM	Bdiv-009770	2.07609	Rad51 protein, putative	TGGT1_272900	putative DNA repair protein RAD51
Bdiv_009780c	1.35617e-19	1.19411	0.233	0.07	2.32854e-16	cow:SM	cow	SM	Bdiv-009780c	3.32857	conserved hypothetical protein
Bdiv_009990c	1.33887e-21	1.33299	0.223	0.056	2.29884e-18	cow:SM	cow	SM	Bdiv-009990c	3.98214	hypothetical protein
Bdiv_010080c	2.12467e-13	0.817336	0.244	0.11	3.64805e-10	cow:SM	cow	SM	Bdiv-010080c	2.21818	prenyltransferase, UbiA family protein	TGGT1_206310	prenyltransferase, UbiA family protein
Bdiv_010590	1.159e-93	1.33593	0.853	0.583	1.99e-90	cow:C	cow	C	Bdiv-010590	1.46312	proteolipid subunit c, putative	TGGT1_212310	vacuolar ATP synthetase
Bdiv_011470c	1.78238e-09	0.797014	0.152	0.08	3.06035e-06	human:SM	human	SM	Bdiv-011470c	1.9	smc family/structural maintenance of chromosome	TGGT1_297800	RecF/RecN/SMC N terminal domain-containing protein
Bdiv_011550	1.50308e-10	1.08451	0.126	0.038	2.5808e-07	cow:SM	cow	SM	Bdiv-011550	3.31579	Potassium channel, putative	TGGT1_238995	ion channel protein
Bdiv_011610c	1.68443e-54	1.61054	0.445	0.132	2.89217e-51	cow:C	cow	C	Bdiv-011610c	3.37121	hypothetical protein	TGGT1_310950	AP2 domain transcription factor AP2XI-3
Bdiv_012550c	8.6996e-17	0.714792	0.214	0.083	1.49372e-13	cow:G	cow	G	Bdiv-012550c	2.57831	serine/threonine protein phosphatase 5	TGGT1_312200	serine/threonine protein phosphatase
Bdiv_012630c	7.12617e-22	0.663243	0.452	0.252	1.22356e-18	cow:G	cow	G	Bdiv-012630c	1.79365	T-complex protein 1 zeta subunit	TGGT1_318410	putative TCP-1 chaperonin
Bdiv_012790	2.95069e-73	0.972237	0.856	0.571	5.06633e-70	cow:C	cow	C	Bdiv-012790	1.49912	surface protein D	TGGT1_255330	hypothetical protein
Bdiv_012930	8.62458e-24	1.62972	0.126	0.005	1.48084e-20	cow:C	cow	C	Bdiv-012930	25.2	jmjC transcription factor, putative	TGGT1_307010	histone lysine demethylase JMJC1/KDM5D/JARID1D
Bdiv_013030c	3.55048e-30	0.983568	0.502	0.246	6.09618e-27	cow:SM	cow	SM	Bdiv-013030c	2.04065	conserved hypothetical protein	TGGT1_216460	hypothetical protein
Bdiv_013120c	1.49752e-27	1.30402	0.252	0.078	2.57124e-24	cow:G	cow	G	Bdiv-013120c	3.23077	conserved hypothetical protein	TGGT1_312630	putative anonymous antigen-1
Bdiv_013360c	2.52206e-14	0.821252	0.117	0.027	4.33038e-11	cow:G	cow	G	Bdiv-013360c	4.33333	hypothetical protein	TGGT1_245650	hypothetical protein
Bdiv_013440	6.38894e-48	2.22195	0.428	0.131	1.09698e-44	cow:SM	cow	SM	Bdiv-013440	3.26718	fatty acyl-CoA synthetase 3
Bdiv_013520c	9.68286e-30	0.857009	0.612	0.374	1.66255e-26	cow:SM	cow	SM	Bdiv-013520c	1.63636	protein disulfide-isomerase, putative	TGGT1_224060	putative thioredoxin
Bdiv_013580c	8.67459e-97	0.739691	0.99	0.934	1.48943e-93	human:C	human	C	Bdiv-013580c	1.05996	hypothetical protein
Bdiv_013920c	3.20579e-19	0.943116	0.201	0.067	5.50435e-16	cow:G	cow	G	Bdiv-013920c	3	hypothetical protein
Bdiv_014000	4.98888e-45	1.78013	0.427	0.141	8.56591e-42	cow:SM	cow	SM	Bdiv-014000	3.02837	antioxidant, AhpC/TSA family
Bdiv_014020c	8.62026e-46	1.18519	0.421	0.139	1.4801e-42	cow:G	cow	G	Bdiv-014020c	3.02878	chaperonin, 10 kDa domain containing protein	TGGT1_263530	putative chaperonin
Bdiv_014710	1.10418e-68	2.60649	0.353	0.031	1.89587e-65	cow:C	cow	C	Bdiv-014710	11.3871	1-phosphatidylinositol-4-phosphate 5-kinase , putative	TGGT1_230490	phosphatidylinositol-4-phosphate 5-kinase
Bdiv_015160c	1.92616e-09	0.68903	0.105	0.028	3.30721e-06	cow:SM	cow	SM	Bdiv-015160c	3.75	hypothetical protein	TGGT1_228400	WD domain, G-beta repeat-containing protein
Bdiv_015180c	7.01687e-09	0.766201	0.142	0.057	1.2048e-05	cow:SM	cow	SM	Bdiv-015180c	2.49123	vacuolar sorting protein 9 (VPS9) domain containing protein	TGGT1_230140	vacuolar sorting protein 9 (vps9) domain-containing protein
Bdiv_015190	9.17277e-38	2.26952	0.359	0.111	1.57496e-34	cow:SM	cow	SM	Bdiv-015190	3.23423	acyltransferase family protein	TGGT1_240860	acyltransferase domain-containing protein
Bdiv_015260c	3.69942e-14	0.903659	0.101	0.019	6.35191e-11	cow:G	cow	G	Bdiv-015260c	5.31579	hypothetical protein	TGGT1_297130	hypothetical protein
Bdiv_015570	3.89083e-53	1.31589	0.538	0.259	6.68055e-50	human:SM	human	SM	Bdiv-015570	2.07722	hypothetical protein	TGGT1_216090	hypothetical protein
Bdiv_016010	9.72072e-07	1.64689	0.252	0.077	0.00166905	cow:MC	cow	MC	Bdiv-016010	3.27273	NLI interacting factor-like phosphatase family protein
Bdiv_016020	1.70361e-29	1.18343	0.372	0.133	2.9251e-26	cow:SM	cow	SM	Bdiv-016020	2.79699	hypothetical protein	TGGT1_275680	hypothetical protein
Bdiv_016040	1.19201e-16	0.963885	0.122	0.024	2.04669e-13	cow:G	cow	G	Bdiv-016040	5.08333	glycosyl transferase, group 2 family protein	TGGT1_277970	dolichol-phosphate-mannose synthase family protein
Bdiv_016060	1.62259e-26	0.809853	0.528	0.272	2.78599e-23	cow:SM	cow	SM	Bdiv-016060	1.94118	hypothetical protein	TGGT1_208340	hypothetical protein
Bdiv_016220	2.33539e-34	1.66129	0.252	0.051	4.00987e-31	cow:C	cow	C	Bdiv-016220	4.94118	thioredoxin domain containing protein
Bdiv_016240	5.17825e-20	1.15727	0.119	0.012	8.89106e-17	cow:G	cow	G	Bdiv-016240	9.91667	tRNA synthetase class II core domain containing protein
Bdiv_016310c	4.91289e-25	0.716841	0.507	0.296	8.43543e-22	cow:G	cow	G	Bdiv-016310c	1.71284	peptidyl-prolyl cis-trans isomerase, cyclophilin- type f domain containing protein
Bdiv_016490c	9.61872e-23	1.20664	0.171	0.036	1.65153e-19	cow:G	cow	G	Bdiv-016490c	4.75	hypothetical protein	TGGT1_297360	hypothetical protein
Bdiv_016930	9.07506e-85	3.01761	0.393	0.022	1.55819e-81	cow:C	cow	C	Bdiv-016930	17.8636	long-chain acyl-CoA synthetase, putative	TGGT1_247760	AMP-binding enzyme domain-containing protein
Bdiv_017140	7.56139e-108	1.58481	0.838	0.436	1.29829e-104	cow:SM	cow	SM	Bdiv-017140	1.92202	conserved hypothetical protein	TGGT1_260500	putative COPI associated protein
Bdiv_017200	2.42478e-64	2.6358	0.336	0.03	4.16335e-61	cow:C	cow	C	Bdiv-017200	11.2	pyruvate kinase family protein	TGGT1_299070	pyruvate kinase PyKII
Bdiv_017290	4.69437e-15	0.709378	0.195	0.075	8.06024e-12	cow:G	cow	G	Bdiv-017290	2.6	ubiquitin family protein
Bdiv_017540	3.33705e-30	2.052	0.204	0.013	5.72972e-27	cow:SM	cow	SM	Bdiv-017540	15.6923	geranylgeranyl transferase type II beta subunit, putative	TGGT1_316270	putative Rab geranylgeranyl transferase type II beta subunit
Bdiv_017860	3.46916e-29	1.40916	0.323	0.102	5.95655e-26	cow:SM	cow	SM	Bdiv-017860	3.16667	conserved hypothetical protein	TGGT1_264710	bucentaur or craniofacial development domain-containing protein
Bdiv_017910	4.4503e-09	0.725898	0.281	0.209	7.64116e-06	human:G	human	G	Bdiv-017910	1.3445	conserved hypothetical protein
Bdiv_018020	4.65131e-17	0.634573	0.343	0.182	7.9863e-14	cow:G	cow	G	Bdiv-018020	1.88462	hypothetical protein
Bdiv_018340	1.60138e-15	0.969269	0.27	0.123	2.74958e-12	cow:SM	cow	SM	Bdiv-018340	2.19512	nonclathrin coat protein zeta2-cop-related protein, putative	TGGT1_280550	clathrin adaptor complex small chain subfamily protein
Bdiv_018420c	6.62031e-08	0.648354	0.334	0.23	0.000113671	cow:SM	cow	SM	Bdiv-018420c	1.45217	conserved hypothetical protein	TGGT1_225530	metal cation transporter, ZIP family protein
Bdiv_018750c	4.6868e-18	0.947472	0.307	0.155	8.04724e-15	cow:G	cow	G	Bdiv-018750c	1.98065	pentatricopeptide repeat domain containing protein	TGGT1_252210	pentatricopeptide repeat domain-containing protein
Bdiv_018790	2.01234e-46	1.66016	0.334	0.071	3.45518e-43	cow:C	cow	C	Bdiv-018790	4.70423	conserved hypothetical protein	TGGT1_205490	putative integral membrane protein
Bdiv_018860	3.93179e-13	0.634204	0.18	0.074	6.75088e-10	cow:G	cow	G	Bdiv-018860	2.43243	hypothetical protein	TGGT1_288570	hypothetical protein
Bdiv_019130	1.61859e-27	0.950969	0.276	0.093	2.77913e-24	cow:G	cow	G	Bdiv-019130	2.96774	replication factor C subunit 4	TGGT1_210960	putative replication factor C subunit 4
Bdiv_020310	7.7892e-09	0.585621	0.364	0.258	1.33741e-05	human:SM	human	SM	Bdiv-020310	1.41085	ribonucleoside-diphosphate reductase large chain	TGGT1_294640	ribonucleoside-diphosphate reductase large chain
Bdiv_020470c	7.44817e-58	1.65119	0.356	0.123	1.27885e-54	human:C	human	C	Bdiv-020470c	2.89431	cytochrome b5-like Heme/Steroid binding domain containing protein	TGGT1_276110	cytochrome b5 family heme/steroid binding domain-containing protein
Bdiv_020480	2.27384e-25	0.69804	0.73	0.53	3.90418e-22	cow:SM	cow	SM	Bdiv-020480	1.37736	membrane protein, putative
Bdiv_020490	1.1399e-26	0.588888	0.892	0.837	1.95721e-23	human:SM	human	SM	Bdiv-020490	1.06571	acid phosphatase, putative	TGGT1_219320	acid phosphatase GAP50
Bdiv_020650	1.45834e-13	0.684844	0.35	0.195	2.50398e-10	cow:SM	cow	SM	Bdiv-020650	1.79487	hypothetical protein	TGGT1_277910	thrombospondin type 1 domain-containing protein
Bdiv_020930c	6.31381e-23	0.702463	0.575	0.473	1.08408e-19	human:G	human	G	Bdiv-020930c	1.21564	regulator of ribosome biosynthesis, putative	TGGT1_320450	ribosome biogenesis regulatory protein (rrs1) protein
Bdiv_021000c	1.98142e-11	0.796342	0.301	0.17	3.4021e-08	cow:SM	cow	SM	Bdiv-021000c	1.77059	hypothetical protein	TGGT1_310930	hypothetical protein
Bdiv_021230	2.61187e-10	0.660627	0.279	0.161	4.48459e-07	cow:SM	cow	SM	Bdiv-021230	1.73292	conserved hypothetical protein	TGGT1_311400	WD domain, G-beta repeat-containing protein
Bdiv_021250c	2.99426e-12	0.643912	0.16	0.063	5.14115e-09	cow:G	cow	G	Bdiv-021250c	2.53968	RNAse P protein subunit domain containing protein
Bdiv_021690c	4.62232e-35	2.07804	0.237	0.018	7.93653e-32	cow:SM	cow	SM	Bdiv-021690c	13.1667	hypothetical protein	TGGT1_216670	FUSE-binding protein 2 / KH-type splicing regulatory protein
Bdiv_021830	4.2574e-37	2.40412	0.179	0.001	7.30995e-34	cow:C	cow	C	Bdiv-021830	179	protein disulfide isomerase related protein	TGGT1_249270	putative protein disulfide isomerase-related protein (provisional)
Bdiv_022680	6.07065e-11	0.618448	0.375	0.258	1.04233e-07	human:SM	human	SM	Bdiv-022680	1.45349	proteasome 26S regulatory subunit, putative	TGGT1_313410	proteasome 26S regulatory subunit
Bdiv_022710	2.27313e-17	1.02338	0.272	0.113	3.90296e-14	cow:SM	cow	SM	Bdiv-022710	2.40708	mu1 adaptin	TGGT1_289770	mu1 adaptin
Bdiv_022790	8.83149e-08	1.75775	0.273	0.077	0.000151637	cow:MC	cow	MC	Bdiv-022790	3.54545	P-type ATPase4, putative	TGGT1_278660	putative P-type ATPase4
Bdiv_022900	1.22316e-35	1.38923	0.337	0.118	2.10017e-32	cow:G	cow	G	Bdiv-022900	2.85593	glycerophosphoryl diester phosphodiesterase, putative
Bdiv_022920c	8.57939e-09	0.795608	0.152	0.083	1.47308e-05	human:SM	human	SM	Bdiv-022920c	1.83133	hypothetical protein	TGGT1_253960	oxidoreductase, short chain dehydrogenase/reductase family protein
Bdiv_022960c	3.14739e-11	0.871254	0.157	0.078	5.40407e-08	human:SM	human	SM	Bdiv-022960c	2.01282	zinc finger, C3HC4 type domain containing protein	TGGT1_304460	zinc finger, C3HC4 type (RING finger) domain-containing protein
Bdiv_023090	4.32001e-06	0.644116	0.225	0.17	0.00741746	human:G	human	G	Bdiv-023090	1.32353	hypothetical protein
Bdiv_023260c	1.47845e-10	0.63139	0.319	0.185	2.53849e-07	cow:SM	cow	SM	Bdiv-023260c	1.72432	membrane protein, putative
Bdiv_023290c	7.6907e-07	1.16392	0.271	0.082	0.00132049	cow:MC	cow	MC	Bdiv-023290c	3.30488	hypothetical protein	TGGT1_205670	SF-assemblin/beta giardin protein
Bdiv_023440	1.40572e-10	0.790138	0.167	0.066	2.41363e-07	cow:SM	cow	SM	Bdiv-023440	2.5303	conserved hypothetical protein	TGGT1_313570	regulator of chromosome condensation (RCC1) repeat-containing protein
Bdiv_023470	1.21777e-24	1.6775	0.128	0.004	2.09091e-21	cow:C	cow	C	Bdiv-023470	32	ubiquitin-conjugating enzyme, putative	TGGT1_235450	ubiquitin-conjugating enzyme subfamily protein
Bdiv_023550	5.56969e-09	0.71111	0.251	0.179	9.56316e-06	human:G	human	G	Bdiv-023550	1.40223	conserved hypothetical protein	TGGT1_316760	hypothetical protein
Bdiv_023670	3.39264e-10	0.726734	0.16	0.062	5.82517e-07	cow:SM	cow	SM	Bdiv-023670	2.58065	DNA mismatch repair protein, putative	TGGT1_266390	DNA mismatch repair protein, C-terminal domain-containing protein
Bdiv_023690c	4.5388e-30	1.40922	0.181	0.021	7.79312e-27	cow:G	cow	G	Bdiv-023690c	8.61905	hypothetical protein	TGGT1_288040	hypothetical protein
Bdiv_024000c	8.38497e-15	0.830115	0.309	0.152	1.4397e-11	cow:SM	cow	SM	Bdiv-024000c	2.03289	hypothetical protein	TGGT1_232040	hypothetical protein
Bdiv_024080	8.31469e-14	0.733394	0.157	0.056	1.42763e-10	cow:G	cow	G	Bdiv-024080	2.80357	hypothetical protein	TGGT1_306195	hypothetical protein
Bdiv_024130	2.26997e-108	1.72222	0.722	0.342	3.89754e-105	cow:G	cow	G	Bdiv-024130	2.11111	adenylate kinase 2	TGGT1_224900	putative adenylate kinase
Bdiv_024360	6.20832e-110	4.48251	0.462	0.021	1.06597e-106	cow:C	cow	C	Bdiv-024360	22	conserved hypothetical protein	TGGT1_301350	SNARE associated protein
Bdiv_024560c	3.32042e-20	0.610808	0.792	0.644	5.70117e-17	cow:SM	cow	SM	Bdiv-024560c	1.22981	translation elongation factor-1 beta subunit	TGGT1_226410	EF-1 guanine nucleotide exchange domain-containing protein
Bdiv_024640	5.83392e-17	0.626379	0.33	0.172	1.00168e-13	cow:G	cow	G	Bdiv-024640	1.9186	peptidyl-prolyl cis-trans isomerase, putative	TGGT1_285760	U-snRNP-associated cyclophilin family protein
Bdiv_024970c	3.83227e-20	1.1739	0.234	0.069	6.58e-17	cow:SM	cow	SM	Bdiv-024970c	3.3913	orotidine 5'-phosphate decarboxylase, putative	TGGT1_259690	orotidine-5-phosphate decarboxylase/orotate phosphoribosyltransferase
Bdiv_025010	1.64368e-35	2.26282	0.259	0.031	2.8222e-32	cow:SM	cow	SM	Bdiv-025010	8.35484	UDP-galactose transporter, putative	TGGT1_254580	UDP-galactose transporter family protein
Bdiv_025210	1.03162e-36	1.36127	0.282	0.068	1.77129e-33	cow:G	cow	G	Bdiv-025210	4.14706	transmembrane CLPTM1 family protein	TGGT1_205240	cleft lip and palate transmembrane protein 1 (clptm1) protein
Bdiv_025260c	1.80873e-48	1.15042	0.608	0.304	3.10559e-45	cow:C	cow	C	Bdiv-025260c	2	superoxide dismutase, putative	TGGT1_316310	superoxide dismutase
Bdiv_025380c	1.33735e-08	0.624123	0.433	0.338	2.29623e-05	human:SM	human	SM	Bdiv-025380c	1.28107	ethanolamine phosphatidyltransferase, putative	TGGT1_257510	CDP-alcohol phosphatidyltransferase superfamily protein
Bdiv_026840c	2.96367e-06	0.715138	0.313	0.244	0.00508862	human:SM	human	SM	Bdiv-026840c	1.28279	41K blood stage antigen precursor 41-3	TGGT1_268620	putative blood stage antigen 41-3 precursor
Bdiv_027250	1.06605e-26	1.52249	0.286	0.08	1.83041e-23	cow:SM	cow	SM	Bdiv-027250	3.575	endonuclease/exonuclease/phosphatase, putative	TGGT1_271120	endonuclease/exonuclease/phosphatase family protein
Bdiv_027330	1.72634e-72	2.56388	0.34	0.024	2.96412e-69	cow:G	cow	G	Bdiv-027330	14.1667	serine hydroxymethyltransferase, putative	TGGT1_234190	putative serine hydroxymethyltransferase 2
Bdiv_027460	5.64863e-14	0.774437	0.155	0.053	9.6987e-11	cow:G	cow	G	Bdiv-027460	2.92453	conserved hypothetical protein	TGGT1_272770	hypothetical protein
Bdiv_028420	8.10369e-60	0.791826	0.926	0.749	1.3914e-56	cow:SM	cow	SM	Bdiv-028420	1.23632	histamine-releasing factor, putative	TGGT1_251680	putative histamine-releasing factor
Bdiv_028430	3.75703e-14	0.794834	0.169	0.063	6.45083e-11	cow:G	cow	G	Bdiv-028430	2.68254	MYND finger domain protein, putative	TGGT1_310850	MYND finger domain-containing protein
Bdiv_028640	5.40362e-74	1.11787	0.825	0.67	9.27802e-71	human:C	human	C	Bdiv-028640	1.23134	conserved hypothetical protein
Bdiv_028830c	9.94978e-17	0.949151	0.121	0.022	1.70838e-13	cow:G	cow	G	Bdiv-028830c	5.5	DegP protease, putative	TGGT1_290840	serine protease
Bdiv_028840c	8.52818e-58	2.44487	0.376	0.046	1.46429e-54	cow:SM	cow	SM	Bdiv-028840c	8.17391	glutaredoxin-like protein, putative	TGGT1_279400	putative glutaredoxin
Bdiv_028900c	4.44338e-31	1.39356	0.488	0.257	7.62928e-28	cow:SM	cow	SM	Bdiv-028900c	1.89883	conserved, membrane protein, putative	TGGT1_310750	emp24/gp25L/p24 family protein
Bdiv_029570	4.30435e-38	0.63193	0.809	0.719	7.39058e-35	human:G	human	G	Bdiv-029570	1.12517	heat shock protein 70	TGGT1_251780	heat shock protein
Bdiv_029700c	5.36096e-23	1.24839	0.165	0.031	9.20477e-20	cow:G	cow	G	Bdiv-029700c	5.32258	conserved hypothetical protein	TGGT1_312670	hypothetical protein
Bdiv_029910c	1.44818e-69	1.29023	0.814	0.562	2.48653e-66	cow:SM	cow	SM	Bdiv-029910c	1.4484	protein transport protein SEC61 gamma subunit, putative	TGGT1_230380	protein translocation complex, SEC61 gamma subunit
Bdiv_029940	2.31266e-13	0.778953	0.179	0.074	3.97084e-10	cow:G	cow	G	Bdiv-029940	2.41892	ATP-NAD-dependent kinase, putative	TGGT1_244700	NAD(+)/NADH kinase domain-containing protein
Bdiv_030420c	6.9949e-08	0.646977	0.372	0.286	0.000120102	human:SM	human	SM	Bdiv-030420c	1.3007	predicted protein,predicted protein	TGGT1_314770	tRNA (guanine-N1)-methyltransferase
Bdiv_030500	1.47142e-07	2.30008	0.15	0.005	0.000252642	cow:MC	cow	MC	Bdiv-030500	30	mannosyltransferase (PIG-M) containing domain	TGGT1_310100	mannosyltransferase (pig-m) protein
Bdiv_030600c	3.8243e-12	0.868621	0.178	0.066	6.56632e-09	cow:SM	cow	SM	Bdiv-030600c	2.69697	Mitochondrial ribosomal protein L37, related	TGGT1_201830	ribosomal protein L37
Bdiv_030700c	1.01333e-17	1.15444	0.187	0.082	1.73988e-14	human:SM	human	SM	Bdiv-030700c	2.28049	hypothetical protein	TGGT1_216250	RecF/RecN/SMC N terminal domain-containing protein
Bdiv_030780	5.20565e-46	0.898333	0.834	0.605	8.9381e-43	cow:SM	cow	SM	Bdiv-030780	1.37851	Elongation factor 1 gamma, conserved domain- containing protein	TGGT1_300140	putative elongation factor 1-gamma
Bdiv_030820c	2.6747e-10	0.668696	0.135	0.054	4.59246e-07	cow:G	cow	G	Bdiv-030820c	2.5	hypothetical protein	TGGT1_281380	hypothetical protein
Bdiv_030860	4.27192e-37	2.12992	0.184	0.004	7.33488e-34	cow:C	cow	C	Bdiv-030860	46	hypothetical protein	TGGT1_249480	tetratricopeptide repeat-containing protein
Bdiv_030890	9.20715e-14	1.2522	0.328	0.184	1.58087e-10	cow:SM	cow	SM	Bdiv-030890	1.78261	Metacaspase-1	TGGT1_278975	ICE family protease (caspase) p20 domain-containing protein
Bdiv_030970	3.26584e-20	1.01764	0.186	0.053	5.60745e-17	cow:G	cow	G	Bdiv-030970	3.50943	lysyl-tRNA synthetase, putative
Bdiv_030980c	1.95069e-34	1.28544	0.31	0.097	3.34934e-31	cow:G	cow	G	Bdiv-030980c	3.19588	KE2 family protein, putative	TGGT1_293580	prefoldin subunit protein
Bdiv_031730c	4.18356e-75	1.89566	0.951	0.893	7.18317e-72	cow:SM	cow	SM	Bdiv-031730c	1.06495	membrane protein, putative	TGGT1_205330	hypothetical protein
Bdiv_031830	9.46937e-12	0.589128	0.146	0.056	1.62589e-08	cow:G	cow	G	Bdiv-031830	2.60714	hypothetical protein	TGGT1_271030	AP2 domain transcription factor AP2VIII-6
Bdiv_032110c	7.16141e-10	0.684834	0.223	0.132	1.22961e-06	human:SM	human	SM	Bdiv-032110c	1.68939	hypothetical protein
Bdiv_032180c	2.40239e-07	2.75317	0.134	0	0.000412491	cow:MC	cow	MC	Bdiv-032180c		hypothetical protein
Bdiv_032340c	6.73626e-07	0.856464	0.313	0.248	0.00115662	human:SM	human	SM	Bdiv-032340c	1.2621	Plasmodium falciparum CPW-WPC domain containing protein	TGGT1_278690	cpw-wpc domain-containing protein
Bdiv_032350	7.52767e-17	1.25744	0.156	0.03	1.2925e-13	cow:SM	cow	SM	Bdiv-032350	5.2	conserved hypothetical protein	TGGT1_254780	hypothetical protein
Bdiv_032440	6.00101e-10	0.583526	0.185	0.093	1.03037e-06	cow:G	cow	G	Bdiv-032440	1.98925	hypothetical protein	TGGT1_253510	transporter/permease protein
Bdiv_032480	7.2818e-47	1.91146	0.366	0.069	1.25028e-43	cow:SM	cow	SM	Bdiv-032480	5.30435	vacuolar protein sorting 29, putative	TGGT1_252490	putative vacuolar protein sorting 29
Bdiv_032850c	6.99904e-14	0.752062	0.429	0.317	1.20173e-10	human:C	human	C	Bdiv-032850c	1.35331	hypothetical protein
Bdiv_033030c	1.00385e-08	0.850765	0.139	0.074	1.72361e-05	human:SM	human	SM	Bdiv-033030c	1.87838	hypothetical protein	TGGT1_215710	hypothetical protein
Bdiv_033040c	3.40418e-10	0.854486	0.215	0.108	5.84497e-07	cow:SM	cow	SM	Bdiv-033040c	1.99074	Dcp1-like decapping family protein
Bdiv_033310c	1.34063e-14	0.70169	0.321	0.171	2.30186e-11	cow:C	cow	C	Bdiv-033310c	1.87719	V-type ATPase 116kDa subunit family protein	TGGT1_232830	putative vacuolar proton translocating ATPase subunit A
Bdiv_033400	1.83769e-21	0.91633	0.338	0.154	3.15531e-18	cow:C	cow	C	Bdiv-033400	2.19481	dehydrogenase E1 component family protein	TGGT1_239490	dehydrogenase E1 component family protein
Bdiv_033440	2.29951e-22	1.08401	0.277	0.133	3.94826e-19	human:SM	human	SM	Bdiv-033440	2.08271	hypothetical protein
Bdiv_033520c	3.16611e-10	0.601212	0.407	0.327	5.43622e-07	human:G	human	G	Bdiv-033520c	1.24465	Maf-like protein family protein	TGGT1_301430	putative septum formation protein maf
Bdiv_033630	2.66885e-16	1.26522	0.216	0.079	4.58242e-13	cow:SM	cow	SM	Bdiv-033630	2.73418	conserved hypothetical protein	TGGT1_223510	hypothetical protein
Bdiv_033730	6.59961e-80	1.64582	0.642	0.306	1.13315e-76	cow:G	cow	G	Bdiv-033730	2.09804	casein kinase II, alpha chain (CK II)	TGGT1_263070	CMGC kinase, CK2 family
Bdiv_033910c	1.02834e-19	1.51619	0.227	0.072	1.76567e-16	cow:SM	cow	SM	Bdiv-033910c	3.15278	membrane protein, putative	TGGT1_235660	hypothetical protein
Bdiv_033930c	2.28301e-33	1.65981	0.173	0.009	3.91993e-30	cow:G	cow	G	Bdiv-033930c	19.2222	hypothetical protein	TGGT1_213690	ring box protein 1 family protein
Bdiv_034020c	8.80227e-08	0.745429	0.721	0.451	0.000151135	cow:MC	cow	MC	Bdiv-034020c	1.59867	membrane-associated calcum-binding protein, putative	TGGT1_229480	putative calcium binding protein precursor
Bdiv_034310c	3.32664e-142	4.00642	0.607	0.092	5.71185e-139	cow:C	cow	C	Bdiv-034310c	6.59783	acetyltransferase, GNAT family protein	TGGT1_289900	n-acetyltransferase family protein
Bdiv_034460	6.52643e-35	1.85958	0.194	0.014	1.12059e-31	cow:C	cow	C	Bdiv-034460	13.8571	nucleolar protein,Nop52 family protein	TGGT1_224970	nucleolar protein
Bdiv_034470c	1.28153e-12	0.774533	0.284	0.17	2.20038e-09	human:SM	human	SM	Bdiv-034470c	1.67059	NifU-like domain containing protein	TGGT1_212930	NifU family domain-containing protein
Bdiv_034980c	2.44873e-19	0.838639	0.467	0.312	4.20447e-16	human:SM	human	SM	Bdiv-034980c	1.49679	thymidylate kinase, putative	TGGT1_306970	thymidylate kinase
Bdiv_035010c	1.91591e-42	1.36549	0.579	0.298	3.28962e-39	cow:SM	cow	SM	Bdiv-035010c	1.94295	membrane protein, putative
Bdiv_035020c	4.67021e-29	0.83667	0.593	0.43	8.01876e-26	human:C	human	C	Bdiv-035020c	1.37907	glutaminyl-tRNA synthetase family protein	TGGT1_217460	glutaminyl-tRNA synthetase (GlnRS)
Bdiv_035130	3.32091e-11	0.67539	0.144	0.057	5.702e-08	cow:G	cow	G	Bdiv-035130	2.52632	apurinic endonuclease (APN1) family protein	TGGT1_288680	endonuclease IV APN
Bdiv_035350c	2.17858e-45	1.48323	0.339	0.084	3.74062e-42	cow:G	cow	G	Bdiv-035350c	4.03571	conserved hypothetical protein	TGGT1_209950	putative thioredoxin
Bdiv_035640	4.72425e-35	0.646031	0.83	0.737	8.11153e-32	human:C	human	C	Bdiv-035640	1.12619	protein kinase domain containing protein	TGGT1_226030	AGC kinase
Bdiv_035660c	2.18348e-07	0.752689	0.16	0.103	0.000374903	human:G	human	G	Bdiv-035660c	1.5534	tRNA pseudouridine synthase, putative	TGGT1_306520	putative tRNA pseudouridine synthase B
Bdiv_035870	4.96521e-21	0.732977	0.45	0.262	8.52527e-18	cow:G	cow	G	Bdiv-035870	1.71756	hypothetical protein	TGGT1_248460	putative ubiquitin
Bdiv_036080c	4.03667e-13	0.680901	0.135	0.042	6.93097e-10	cow:G	cow	G	Bdiv-036080c	3.21429	hypothetical protein	TGGT1_239930	putative beta-catenin family protein 1
Bdiv_036170c	3.50528e-11	0.667696	0.379	0.261	6.01857e-08	human:SM	human	SM	Bdiv-036170c	1.45211	fatty acyl-CoA synthetase family protein	TGGT1_243800	putative long-chain fatty acid CoA ligase
Bdiv_036430	1.74163e-24	0.958333	0.592	0.401	2.99038e-21	cow:C	cow	C	Bdiv-036430	1.47631	membrane protein, putative	TGGT1_224205	putative ER lumen protein retaining receptor
Bdiv_036680c	1.35135e-19	0.760052	0.293	0.131	2.32027e-16	cow:G	cow	G	Bdiv-036680c	2.23664	hypothetical protein	TGGT1_256840	hypothetical protein
Bdiv_037020c	1.67871e-13	0.924709	0.175	0.066	2.88234e-10	cow:C	cow	C	Bdiv-037020c	2.65152	Dullard-like phosphatase domain containing protein	TGGT1_310660	Dullard family phosphatase domain-containing protein
Bdiv_037500	4.27774e-06	1.53938	0.121	0.005	0.00734488	cow:MC	cow	MC	Bdiv-037500	24.2	hypothetical protein	TGGT1_263240	hypothetical protein
Bdiv_037770	1.13043e-07	0.872676	0.164	0.082	0.000194095	cow:SM	cow	SM	Bdiv-037770	2	FHA domain containing protein	TGGT1_208310	hypothetical protein
Bdiv_038000	1.49397e-20	0.615141	0.434	0.238	2.56515e-17	cow:G	cow	G	Bdiv-038000	1.82353	hypothetical protein	TGGT1_201800	hypothetical protein
Bdiv_038040c	7.87025e-22	1.14733	0.181	0.046	1.35132e-18	cow:G	cow	G	Bdiv-038040c	3.93478	mitochondrial carrier protein family protein	TGGT1_274060	2-oxoglutarate/malate translocase OMT
Bdiv_038140c	4.87443e-09	0.641847	0.292	0.198	8.36939e-06	human:SM	human	SM	Bdiv-038140c	1.47475	hypothetical protein
Bdiv_038180c	1.62376e-90	3.58702	0.37	0.004	2.788e-87	cow:G	cow	G	Bdiv-038180c	92.5	nucleoside diphosphate kinase family protein	TGGT1_295350	putative nucleoside diphosphate kinase
Bdiv_038210	1.16989e-16	1.42927	0.138	0.021	2.0087e-13	cow:SM	cow	SM	Bdiv-038210	6.57143	clathrin adaptor complex small chain family protein
Bdiv_038330c	1.28503e-07	0.584175	0.223	0.13	0.000220639	cow:SM	cow	SM	Bdiv-038330c	1.71538	conserved hypothetical protein
Bdiv_038390	1.7904e-86	1.40379	0.8	0.457	3.07411e-83	cow:SM	cow	SM	Bdiv-038390	1.75055	membrane protein, putative	TGGT1_258820	hypothetical protein
Bdiv_038490	9.3039e-07	0.634915	0.627	0.346	0.00159748	cow:MC	cow	MC	Bdiv-038490	1.81214	tubulin alpha chain, putative	TGGT1_316400B	alpha tubulin TUBA1
Bdiv_038660	6.46596e-13	1.01768	0.27	0.161	1.11021e-09	human:SM	human	SM	Bdiv-038660	1.67702	conserved hypothetical protein	TGGT1_312660	hypothetical protein
Bdiv_038950c	4.05452e-15	1.28086	0.152	0.036	6.96162e-12	cow:SM	cow	SM	Bdiv-038950c	4.22222	ribose 5-phosphate isomerase A family protein	TGGT1_239310	ribulose 5-phosphate isomerase
Bdiv_038960	8.10035e-13	1.03204	0.184	0.069	1.39083e-09	cow:SM	cow	SM	Bdiv-038960	2.66667	hypothetical protein	TGGT1_269060	hypothetical protein
Bdiv_038990c	2.20253e-18	0.924192	0.317	0.138	3.78175e-15	cow:SM	cow	SM	Bdiv-038990c	2.2971	DHHC zinc finger domain containing protein
Bdiv_039600	9.5023e-12	0.753934	0.25	0.125	1.63155e-08	cow:SM	cow	SM	Bdiv-039600	2	hypothetical protein
Bdiv_040320	5.39247e-35	1.75245	0.331	0.087	9.25886e-32	cow:SM	cow	SM	Bdiv-040320	3.8046	conserved hypothetical protein	TGGT1_204370	WD-40 repeat protein
Bdiv_040460	1.7953e-80	2.84102	0.374	0.031	3.08254e-77	cow:G	cow	G	Bdiv-040460	12.0645	membrane protein, putative
Bdiv_040540	1.04366e-32	1.04238	0.584	0.366	1.79197e-29	cow:C	cow	C	Bdiv-040540	1.59563	hypothetical protein
Bdiv_040590c	6.77214e-09	0.779904	0.138	0.071	1.16278e-05	human:SM	human	SM	Bdiv-040590c	1.94366	adenylosuccinate lyase, putative	TGGT1_263190	putative adenylosuccinate lyase
